# Supplementary material for: Association between Helicobacter pylori infection and arterial stiffness: Results from a large cross-sectional study
Source: PubMed Central journal article supplement (PMC6715239; doi:10.1371/journal.pone.0221643), 2019-08-29

Supplementary Figure 1. Distribution of CAVI values according to *H. pylori* seropositivity

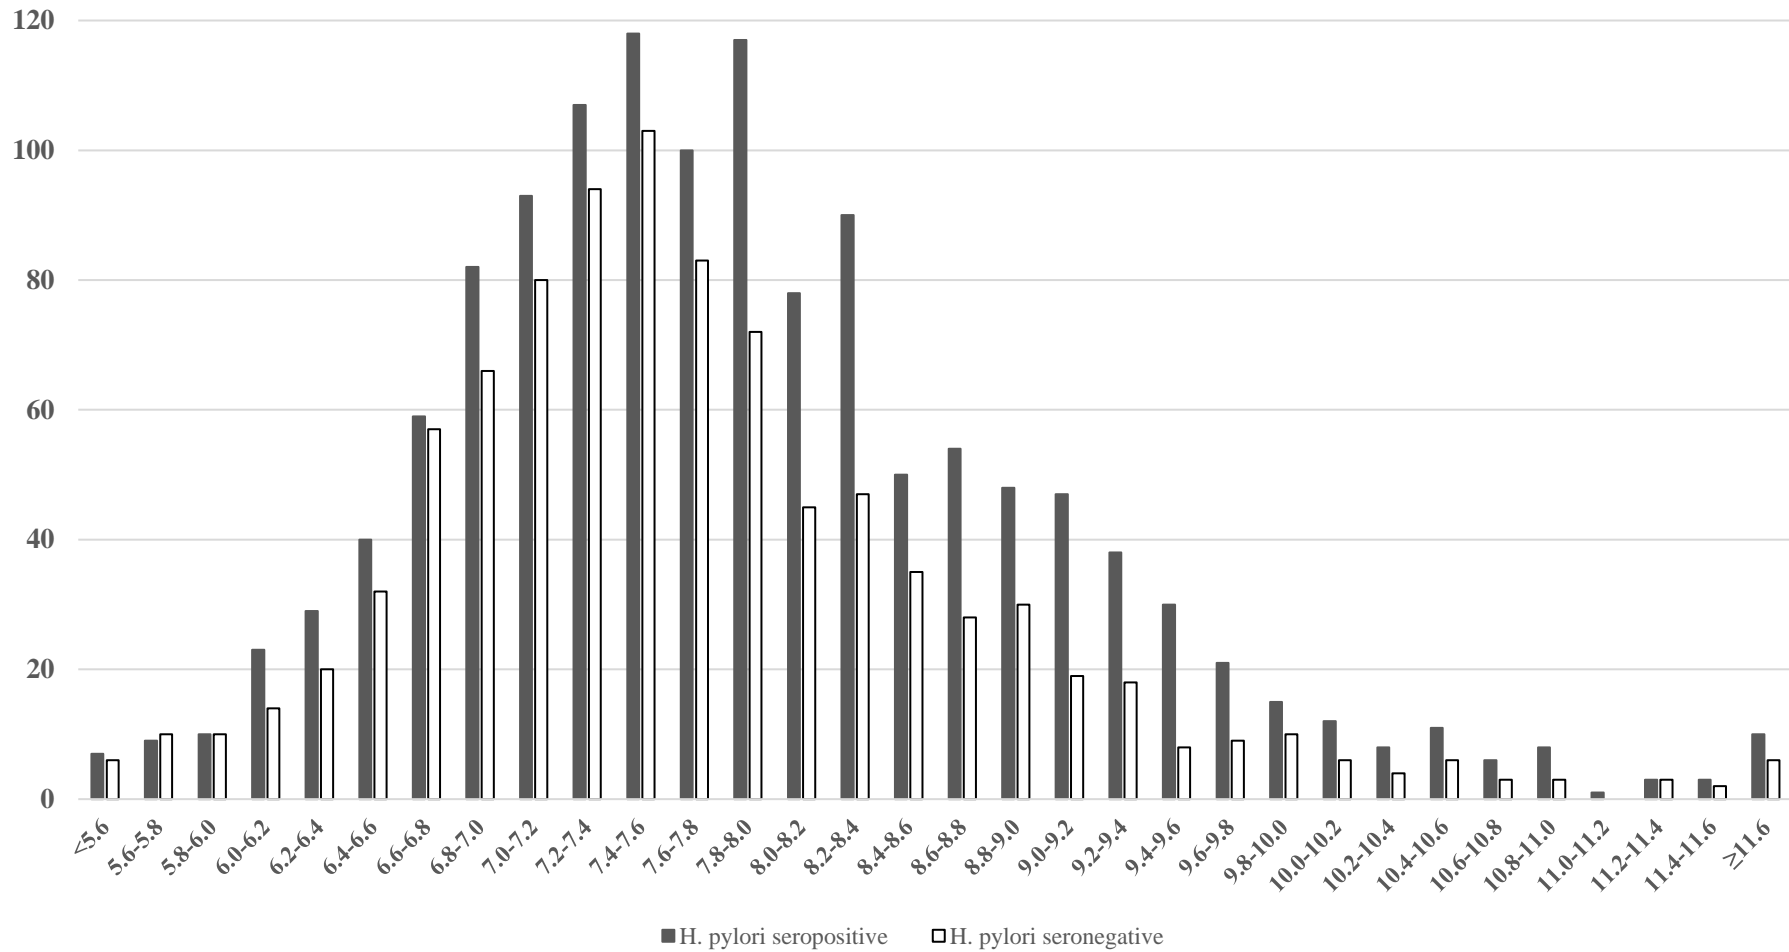

Supplement: pone.0221643.s003.pdf [file pone.0221643.s003.pdf]
