# Supplementary material for: Association between Helicobacter pylori infection and arterial stiffness: Results from a large cross-sectional study
Source: PubMed Central journal article supplement (PMC6715239; doi:10.1371/journal.pone.0221643), 2019-08-29
Supplement: pone.0221643.s006.pdf [file pone.0221643.s006.pdf]

| Sex | Age | BMI  | Waist | Smoking | Alcohol | Exercise | HTN | DM | Dyslipid | SBP | DBP | PR | CAVI_Rt | CAVI_Lt | CAVI_mean | GLU | BUN | CR   | CHOL | TG  | HDL | LDLC | HBA1C | H.pylori |
|-----|-----|------|-------|---------|---------|----------|-----|----|----------|-----|-----|----|---------|---------|-----------|-----|-----|------|------|-----|-----|------|-------|----------|
| 1   | 68  | 24.4 | 89    | 1       | 1       | 1        | 1   | 0  | 1        | 141 | 88  | 69 | 8.9     | 8.5     | 8.7       | 117 | 10  | 0.89 | 167  | 145 | 49  | 98   | 5.6   | 1        |
| 2   | 81  | 20.8 | 79    | 1       | 2       | 1        | 1   | 0  | 1        | 148 | 81  | 52 | 9.3     | 9.3     | 9.3       | 81  | 18  | 0.55 | 245  | 109 | 78  | 142  | 5.5   | 1        |
| 1   | 65  | 27.9 | 94.5  | 1       | 1       | 1        | 1   | 0  | 0        | 149 | 95  | 72 | 9.2     | 8.7     | 8.95      | 89  | 15  | 0.94 | 171  | 108 | 42  | 107  | 5.3   | 1        |
| 2   | 63  | 20.8 | 75    | 1       | 1       | 1        | 1   | 1  | 0        | 128 | 82  | 79 | 9.3     | 9.1     | 9.2       | 146 | 16  | 0.63 | 215  | 78  | 57  | 142  | 7.9   | 1        |
| 2   | 54  | 20.8 | 83    | 1       | 1       | 1        | 0   | 0  | 1        | 129 | 83  | 60 | 7.5     | 7.6     | 7.55      | 86  | 14  | 0.74 | 265  | 128 | 66  | 166  | 6.1   | 0        |
| 1   | 60  | 25.9 | 88    | 1       | 2       | 1        | 1   | 0  | 1        | 119 | 90  | 75 | 7.7     | 7.7     | 7.7       | 99  | 15  | 0.91 | 166  | 81  | 48  | 105  | 5.4   | 0        |
| 1   | 53  | 26.4 | 94    | 2       | 1       | 1        | 1   | 1  | 1        | 146 | 103 | 83 | 9       | 8.3     | 8.65      | 176 | 20  | 0.97 | 134  | 152 | 59  | 69   | 6.5   | 0        |
| 2   | 59  | 24.1 | 82    | 1       | 1       | 1        | 0   | 1  | 0        | 128 | 70  | 61 | 7.9     | 8       | 7.95      | 107 | 15  | 0.59 | 232  | 108 | 48  | 159  | 6.9   | 0        |
| 2   | 43  | 24.7 | 79    | 2       | 1       | 1        | 1   | 0  | 0        | 120 | 80  | 75 | 6.9     | 7.2     | 7.05      | 85  | 14  | 0.65 | 191  | 70  | 58  | 117  | 5.4   | 1        |
| 2   | 43  | 22.6 | 84    | 2       | 1       | 1        | 1   | 0  | 0        | 114 | 74  | 65 | 6.9     | 6.9     | 6.9       | 80  | 10  | 0.69 | 159  | 64  | 44  | 96   | 5.6   | 1        |
| 1   | 56  | 28.7 | 100   | 2       | 1       | 1        | 0   | 0  | 1        | 127 | 84  | 65 | 6.6     | 6.6     | 6.6       | 112 | 12  | 0.82 | 229  | 162 | 47  | 143  | 5.9   | 1        |
| 1   | 65  | 25.4 | 91    | 1       | 1       | 1        | 0   | 1  | 0        | 128 | 85  | 63 | 10      | 10.1    | 10.05     | 93  | 27  | 1.25 | 137  | 63  | 56  | 69   | 6.1   | 0        |
| 2   | 59  | 27.7 | 87    | 1       | 1       | 1        | 0   | 0  | 1        | 138 | 89  | 62 | 7.7     | 7.5     | 7.6       | 106 | 21  | 0.84 | 257  | 113 | 58  | 170  | 5.7   | 0        |
| 2   | 51  | 27.1 | 89    | 1       | 1       | 1        | 0   | 0  | 0        | 115 | 77  | 66 | 7.5     | 7.6     | 7.55      | 84  | 13  | 0.83 | 188  | 53  | 50  | 127  | 5.9   | 1        |
| 2   | 44  | 27.7 | 90    | 1       | 1       | 1        | 1   | 0  | 0        | 121 | 77  | 59 | 7.4     | 7.1     | 7.25      | 88  | 12  | 0.79 | 144  | 69  | 45  | 85   | 5.4   | 0        |
| 2   | 51  | 22.5 | 83    | 2       | 1       | 1        | 0   | 0  | 0        | 129 | 76  | 73 | 6.5     | 6.3     | 6.4       | 80  | 11  | 0.7  | 177  | 67  | 73  | 89   | 5.4   | 1        |
| 1   | 72  | 24.9 | 85    | 1       | 1       | 1        | 1   | 1  | 1        | 138 | 97  | 73 | 10.9    | 10.2    | 10.55     | 79  | 17  | 0.83 | 154  | 67  | 35  | 113  | 6.4   | 1        |
| 1   | 67  | 22.1 | 82    | 1       | 1       | 1        | 1   | 0  | 0        | 160 | 105 | 89 | 10      | 9.7     | 9.85      | 113 | 24  | 0.88 | 239  | 54  | 88  | 135  | 5.4   | 0        |
| 1   | 55  | 23.4 | 85    | 2       | 1       | 1        | 1   | 0  | 0        | 138 | 96  | 59 | 10.5    | 7.5     | 9         | 108 | 12  | 0.76 | 197  | 71  | 64  | 119  | 5.4   | 1        |
| 2   | 62  | 21.3 | 84    | 1       | 1       | 2        | 0   | 0  | 1        | 109 | 69  | 80 | 7.5     | 7.5     | 7.5       | 95  | 12  | 0.69 | 171  | 89  | 53  | 101  | 5.6   | 1        |
| 2   | 56  | 20.8 | 71    | 1       | 1       | 1        | 0   | 0  | 1        | 104 | 69  | 66 | 8.4     | 8.1     | 8.25      | 81  | 22  | 0.72 | 275  | 58  | 77  | 175  | 5.6   | 1        |
| 1   | 49  | 20.0 | 74    | 2       | 1       | 1        | 0   | 0  | 1        | 111 | 79  | 73 | 7.7     | 7.9     | 7.8       | 78  | 19  | 0.82 | 244  | 83  | 69  | 154  | 5.4   | 0        |
| 1   | 68  | 26.9 | 91    | 2       | 1       | 2        | 1   | 0  | 1        | 134 | 84  | 55 | 8.2     | 8       | 8.1       | 96  | 13  | 1.19 | 140  | 164 | 32  | 83   | 5.5   | 1        |
| 1   | 21  | 28.7 | 94    | 1       | 1       | 2        | 0   | 0  | 0        | 137 | 65  | 61 | 5.8     | 5.6     | 5.7       | 89  | 12  | 0.9  | 153  | 104 | 45  | 89   | 4.8   | 0        |
| 2   | 33  | 24.1 | 77    | 1       | 1       | 1        | 0   | 0  | 0        | 107 | 63  | 59 | 6.1     | 6.1     | 6.1       | 83  | 13  | 0.79 | 181  | 79  | 52  | 111  | 5.3   | 1        |

|   |    |      |      |   |   |   |   |   |   |     |     |    |      |      |       |     |    |      |     |     |    |     |      |   |
|---|----|------|------|---|---|---|---|---|---|-----|-----|----|------|------|-------|-----|----|------|-----|-----|----|-----|------|---|
| 1 | 68 | 24.3 | 83   | 2 | 1 | 1 | 0 | 0 | 0 | 125 | 81  | 54 | 9.2  | 8.9  | 9.05  | 94  | 19 | 0.8  | 149 | 36  | 54 | 85  | 5.4  | 1 |
| 2 | 71 | 21.5 | 83   | 1 | 1 | 1 | 1 | 0 | 1 | 127 | 88  | 71 | 10   | 9.8  | 9.9   | 94  | 7  | 0.55 | 166 | 119 | 35 | 106 | 5.4  | 1 |
| 2 | 57 | 21.9 | 86   | 1 | 1 | 1 | 0 | 0 | 0 | 101 | 70  | 66 | 7.2  | 7.5  | 7.35  | 91  | 13 | 0.59 | 235 | 91  | 58 | 153 | 4.8  | 0 |
| 1 | 61 | 19.3 | 74.5 | 2 | 1 | 1 | 0 | 0 | 0 | 125 | 75  | 63 | 7.3  | 7.4  | 7.35  | 113 | 12 | 0.95 | 156 | 93  | 51 | 80  | 5.7  | 1 |
| 1 | 56 | 26.9 | 100  | 2 | 1 | 1 | 1 | 1 | 1 | 139 | 90  | 59 | 10.2 | 9    | 9.6   | 94  | 19 | 0.76 | 140 | 95  | 46 | 81  | 6.8  | 1 |
| 2 | 58 | 23.0 | 86   | 1 | 1 | 1 | 1 | 0 | 1 | 132 | 72  | 74 | 7.4  | 7.5  | 7.45  | 86  | 23 | 0.7  | 252 | 60  | 66 | 163 | 5.3  | 0 |
| 2 | 66 | 23.8 | 81   | 1 | 1 | 1 | 1 | 0 | 1 | 117 | 80  | 47 | 8.1  | 8    | 8.05  | 96  | 20 | 0.89 | 170 | 150 | 41 | 106 | 6.1  | 1 |
| 1 | 68 | 28.3 | 96   | 1 | 1 | 1 | 1 | 1 | 1 | 121 | 75  | 44 | 8.8  | 9    | 8.9   | 155 | 20 | 1.05 | 223 | 204 | 47 | 148 | 7.6  | 0 |
| 2 | 64 | 20.3 | 72   | 2 | 1 | 1 | 0 | 0 | 1 | 121 | 62  | 43 | 9.6  | 9.3  | 9.45  | 91  | 18 | 0.7  | 302 | 131 | 57 | 201 | 5.6  | 1 |
| 1 | 34 | 26.2 | 85   | 1 | 2 | 2 | 0 | 0 | 1 | 134 | 86  | 59 | 6.7  | 6.7  | 6.7   | 109 | 17 | 0.9  | 358 | 209 | 48 | 282 | 5.6  | 0 |
| 2 | 35 | 18.8 | 68   | 1 | 1 | 2 | 0 | 0 | 0 | 118 | 71  | 53 | 6.4  | 6.5  | 6.45  | 84  | 16 | 0.85 | 183 | 66  | 57 | 108 | 5.4  | 1 |
| 1 | 63 | 22.1 | 88   | 2 | 1 | 1 | 1 | 0 | 1 | 125 | 77  | 62 | 9.5  | 9.4  | 9.45  | 114 | 17 | 1.05 | 269 | 312 | 39 | 163 | 5.9  | 1 |
| 1 | 46 | 29.1 | 99   | 1 | 2 | 1 | 1 | 1 | 1 | 154 | 106 | 72 | 8.3  | 8.7  | 8.5   | 208 | 10 | 0.84 | 158 | 209 | 48 | 58  | 11.4 | 1 |
| 1 | 64 | 24.7 | 93   | 1 | 1 | 2 | 1 | 1 | 1 | 131 | 93  | 76 | 10.8 | 9.2  | 10    | 140 | 18 | 0.92 | 175 | 53  | 61 | 107 | 7.4  | 1 |
| 2 | 69 | 24.0 | 85   | 1 | 1 | 1 | 1 | 0 | 1 | 118 | 74  | 47 | 8.6  | 8.4  | 8.5   | 93  | 17 | 0.75 | 173 | 178 | 57 | 88  | 5.4  | 0 |
| 1 | 66 | 29.4 | 103  | 1 | 2 | 1 | 1 | 0 | 1 | 137 | 92  | 59 | 8.6  | 9.4  | 9     | 107 | 20 | 0.99 | 180 | 135 | 58 | 99  | 5.6  | 1 |
| 1 | 60 | 21.5 | 82   | 1 | 2 | 1 | 0 | 0 | 0 | 122 | 84  | 56 | 7.8  | 7.6  | 7.7   | 98  | 15 | 0.86 | 190 | 60  | 71 | 98  | 5.4  | 0 |
| 2 | 54 | 24.3 | 84   | 1 | 1 | 2 | 0 | 0 | 1 | 110 | 67  | 54 | 6.3  | 6.4  | 6.35  | 86  | 14 | 0.72 | 385 | 68  | 79 | 264 | 5.4  | 0 |
| 2 | 53 | 21.0 | 78   | 1 | 1 | 2 | 0 | 0 | 0 | 113 | 75  | 53 | 7.3  | 7.4  | 7.35  | 92  | 18 | 0.76 | 233 | 96  | 52 | 149 | 5.5  | 1 |
| 1 | 44 | 27.4 | 95   | 1 | 2 | 1 | 1 | 0 | 1 | 146 | 99  | 53 | 9    | 7.7  | 8.35  | 101 | 13 | 0.93 | 229 | 132 | 60 | 154 | 5.3  | 0 |
| 1 | 71 | 26.6 | 89   | 2 | 2 | 1 | 1 | 1 | 1 | 155 | 90  | 80 | 10.9 | 12.2 | 11.55 | 132 | 19 | 0.91 | 195 | 65  | 43 | 148 | 6.3  | 1 |
| 1 | 70 | 20.0 | 76   | 1 | 1 | 2 | 0 | 0 | 1 | 108 | 71  | 65 | 8    | 7.8  | 7.9   | 90  | 20 | 1.06 | 244 | 57  | 61 | 165 | 5.7  | 1 |
| 1 | 53 | 30.5 | 100  | 2 | 1 | 2 | 0 | 0 | 1 | 136 | 89  | 69 | 6.8  | 6.6  | 6.7   | 109 | 15 | 1.03 | 151 | 116 | 52 | 80  | 5.8  | 1 |
| 2 | 68 | 20.6 | 85   | 1 | 1 | 1 | 1 | 0 | 0 | 131 | 85  | 77 | 10.3 | 10.1 | 10.2  | 83  | 23 | 0.67 | 205 | 80  | 65 | 119 | 5.2  | 0 |
| 2 | 70 | 21.2 | 80   | 1 | 1 | 1 | 0 | 1 | 1 | 127 | 81  | 63 | 8.8  | 9.3  | 9.05  | 102 | 16 | 0.7  | 185 | 242 | 50 | 86  | 6.6  | 1 |
| 1 | 67 | 22.0 | 87   | 1 | 1 | 2 | 0 | 0 | 1 | 128 | 83  | 59 | 8.2  | 7.8  | 8     | 91  | 24 | 0.72 | 259 | 92  | 63 | 177 | 5.5  | 0 |
| 1 | 51 | 24.5 | 86   | 1 | 1 | 1 | 0 | 0 | 0 | 119 | 88  | 58 | 8    | 7.6  | 7.8   | 106 | 17 | 0.82 | 194 | 181 | 48 | 109 | 5.6  | 1 |
| 1 | 60 | 25.7 | 91   | 2 | 1 | 2 | 1 | 1 | 0 | 140 | 95  | 70 | 8.1  | 8    | 8.05  | 128 | 15 | 1.03 | 212 | 177 | 59 | 131 | 6.7  | 1 |
| 2 | 57 | 19.5 | 79.5 | 1 | 1 | 2 | 0 | 0 | 0 | 120 | 70  | 62 | 7.4  | 7.6  | 7.5   | 89  | 15 | 0.55 | 201 | 78  | 57 | 130 | 5.4  | 0 |

|   |    |      |      |   |   |   |   |   |   |     |    |    |     |      |      |     |    |      |     |     |    |     |     |   |
|---|----|------|------|---|---|---|---|---|---|-----|----|----|-----|------|------|-----|----|------|-----|-----|----|-----|-----|---|
| 2 | 56 | 20.4 | 79   | 1 | 1 | 1 | 0 | 0 | 1 | 117 | 74 | 69 | 8.5 | 8.2  | 8.35 | 94  | 16 | 0.72 | 201 | 212 | 50 | 111 | 5.9 | 1 |
| 2 | 55 | 24.7 | 88   | 1 | 1 | 2 | 1 | 0 | 0 | 148 | 90 | 57 | 8.7 | 8.3  | 8.5  | 91  | 17 | 0.47 | 186 | 54  | 57 | 115 | 5.9 | 0 |
| 2 | 65 | 27.2 | 102  | 1 | 2 | 2 | 1 | 1 | 1 | 137 | 94 | 50 | 8   | 8    | 8    | 143 | 15 | 0.58 | 246 | 74  | 75 | 152 | 5.3 | 0 |
| 1 | 65 | 29.0 | 99   | 2 | 1 | 2 | 1 | 0 | 1 | 145 | 85 | 58 | 8.8 | 9    | 8.9  | 114 | 16 | 0.8  | 208 | 204 | 38 | 138 | 5.7 | 1 |
| 1 | 65 | 23.0 | 92   | 2 | 2 | 2 | 1 | 0 | 1 | 125 | 85 | 64 | 8   | 8.8  | 8.4  | 90  | 14 | 0.9  | 232 | 78  | 48 | 174 | 5.6 | 1 |
| 1 | 72 | 20.8 | 81.5 | 2 | 1 | 2 | 1 | 1 | 1 | 134 | 79 | 68 | 12  | 10.6 | 11.3 | 206 | 12 | 0.85 | 153 | 160 | 33 | 103 | 7.5 | 1 |
| 2 | 67 | 25.6 | 93   | 1 | 1 | 2 | 1 | 1 | 0 | 152 | 87 | 57 | 8.7 | 8.9  | 8.8  | 118 | 17 | 0.74 | 172 | 106 | 45 | 114 | 6.7 | 1 |
| 1 | 68 | 24.0 | 84   | 2 | 1 | 2 | 0 | 0 | 1 | 116 | 74 | 64 | 9   | 9.1  | 9.05 | 95  | 14 | 0.85 | 240 | 56  | 56 | 173 | 5.4 | 1 |
| 2 | 57 | 19.8 | 76   | 1 | 1 | 1 | 0 | 0 | 1 | 110 | 71 | 63 | 8.3 | 8.4  | 8.35 | 94  | 15 | 0.76 | 166 | 54  | 68 | 90  | 5.9 | 0 |
| 2 | 42 | 18.3 | 71   | 1 | 1 | 1 | 0 | 0 | 0 | 115 | 72 | 66 | 8.2 | 7.6  | 7.9  | 91  | 11 | 0.59 | 196 | 51  | 64 | 116 | 5.4 | 1 |
| 1 | 56 | 25.1 | 81   | 2 | 1 | 1 | 0 | 1 | 1 | 126 | 86 | 67 | 9.9 | 12.5 | 11.2 | 169 | 15 | 1.04 | 231 | 155 | 67 | 130 | 7.5 | 0 |
| 1 | 51 | 22.3 | 87   | 2 | 1 | 2 | 1 | 0 | 0 | 121 | 79 | 72 | 6.9 | 7    | 6.95 | 120 | 16 | 0.76 | 197 | 88  | 45 | 141 | 5.6 | 1 |
| 1 | 41 | 27.8 | 91   | 2 | 1 | 1 | 1 | 0 | 1 | 128 | 83 | 84 | 7.5 | 7.6  | 7.55 | 115 | 11 | 0.88 | 168 | 200 | 48 | 96  | 5.8 | 1 |
| 2 | 66 | 19.8 | 82   | 1 | 1 | 1 | 0 | 1 | 0 | 122 | 79 | 64 | 8   | 7.8  | 7.9  | 124 | 15 | 0.73 | 225 | 66  | 72 | 130 | 7.4 | 0 |
| 1 | 44 | 32.2 | 99   | 2 | 1 | 1 | 1 | 0 | 1 | 147 | 84 | 47 | 6   | 5.9  | 5.95 | 85  | 16 | 0.91 | 226 | 177 | 40 | 164 | 5.4 | 0 |
| 2 | 54 | 27.5 | 98   | 1 | 1 | 1 | 0 | 0 | 0 | 115 | 70 | 58 | 6.3 | 6.4  | 6.35 | 92  | 13 | 0.96 | 214 | 87  | 52 | 138 | 5.5 | 1 |
| 2 | 58 | 26.3 | 90   | 1 | 1 | 1 | 1 | 0 | 1 | 143 | 95 | 83 | 7.6 | 7.9  | 7.75 | 100 | 11 | 0.53 | 175 | 66  | 57 | 101 | 5.5 | 0 |
| 1 | 45 | 25.8 | 90   | 2 | 1 | 1 | 0 | 0 | 0 | 128 | 84 | 56 | 7   | 7    | 7    | 89  | 12 | 1.16 | 214 | 127 | 43 | 152 | 5.4 | 0 |
| 1 | 43 | 26.3 | 87   | 2 | 2 | 1 | 0 | 0 | 0 | 120 | 86 | 71 | 7.5 | 7.4  | 7.45 | 95  | 11 | 1.06 | 214 | 161 | 69 | 129 | 5.3 | 1 |
| 1 | 43 | 27.4 | 95   | 2 | 1 | 1 | 1 | 0 | 1 | 129 | 85 | 54 | 7.3 | 7.2  | 7.25 | 98  | 16 | 0.98 | 179 | 130 | 45 | 119 | 6.1 | 1 |
| 1 | 61 | 24.9 | 90   | 2 | 2 | 1 | 1 | 0 | 1 | 145 | 89 | 55 | 8.5 | 8.4  | 8.45 | 107 | 16 | 0.78 | 231 | 102 | 47 | 162 | 5.6 | 1 |
| 1 | 60 | 24.1 | 86   | 2 | 1 | 2 | 1 | 0 | 1 | 135 | 85 | 76 | 8.3 | 8    | 8.15 | 74  | 15 | 1.15 | 181 | 61  | 65 | 101 | 5.5 | 1 |
| 2 | 36 | 17.3 | 63.5 | 1 | 1 | 1 | 0 | 0 | 0 | 91  | 58 | 64 | 7.7 | 7.7  | 7.7  | 84  | 8  | 0.71 | 212 | 116 | 61 | 116 | 5.2 | 0 |
| 1 | 41 | 26.5 | 93   | 1 | 2 | 2 | 0 | 0 | 0 | 119 | 76 | 63 | 6.9 | 6.8  | 6.85 | 90  | 14 | 0.93 | 212 | 158 | 46 | 136 | 5.3 | 0 |
| 1 | 36 | 24.0 | 90   | 2 | 2 | 2 | 0 | 0 | 0 | 132 | 86 | 47 | 7.2 | 7.3  | 7.25 | 92  | 13 | 1.18 | 206 | 194 | 57 | 121 | 5   | 1 |
| 1 | 50 | 24.4 | 87   | 2 | 2 | 1 | 0 | 0 | 1 | 121 | 85 | 69 | 7.7 | 8    | 7.85 | 105 | 14 | 0.8  | 271 | 313 | 46 | 180 | 5.4 | 0 |
| 2 | 36 | 23.6 | 84   | 1 | 1 | 2 | 0 | 0 | 0 | 122 | 73 | 56 | 6   | 6.2  | 6.1  | 92  | 9  | 0.55 | 173 | 59  | 53 | 99  | 5.8 | 1 |
| 1 | 66 | 25.1 | 92   | 2 | 1 | 1 | 0 | 0 | 0 | 108 | 71 | 57 | 8.8 | 8.4  | 8.6  | 112 | 11 | 1.06 | 167 | 55  | 41 | 116 | 5.7 | 0 |
| 2 | 67 | 24.3 | 85   | 1 | 1 | 2 | 0 | 1 | 1 | 122 | 77 | 66 | 8.2 | 7.6  | 7.9  | 102 | 15 | 0.69 | 207 | 94  | 54 | 135 | 6.5 | 1 |

|   |    |      |      |   |   |   |   |   |   |     |     |    |      |      |      |     |    |      |     |     |    |     |      |   |
|---|----|------|------|---|---|---|---|---|---|-----|-----|----|------|------|------|-----|----|------|-----|-----|----|-----|------|---|
| 2 | 53 | 19.0 | 75   | 1 | 1 | 2 | 0 | 0 | 0 | 126 | 77  | 52 | 7.8  | 8    | 7.9  | 88  | 14 | 0.58 | 208 | 66  | 78 | 112 | 5.2  | 0 |
| 1 | 44 | 33.2 | 109  | 1 | 1 | 1 | 0 | 0 | 1 | 132 | 77  | 55 | 7    | 6.9  | 6.95 | 97  | 14 | 1.08 | 195 | 198 | 37 | 133 | 5.3  | 0 |
| 1 | 47 | 25.3 | 94   | 2 | 1 | 2 | 0 | 0 | 0 | 125 | 83  | 56 | 8.2  | 8    | 8.1  | 86  | 15 | 1.24 | 192 | 89  | 57 | 118 | 5.4  | 1 |
| 1 | 41 | 29.4 | 93   | 1 | 2 | 1 | 0 | 0 | 1 | 118 | 89  | 61 | 6.8  | 6.6  | 6.7  | 100 | 18 | 1.06 | 294 | 113 | 65 | 208 | 5.3  | 1 |
| 1 | 77 | 27.3 | 96   | 2 | 2 | 2 | 1 | 1 | 1 | 126 | 80  | 74 | 9.3  | 8.9  | 9.1  | 113 | 14 | 0.89 | 203 | 66  | 46 | 145 | 6.5  | 1 |
| 1 | 46 | 25.5 | 96   | 2 | 1 | 1 | 0 | 0 | 0 | 134 | 85  | 64 | 7.2  | 7.5  | 7.35 | 103 | 16 | 0.85 | 207 | 121 | 57 | 134 | 6.2  | 0 |
| 1 | 39 | 26.0 | 92   | 1 | 1 | 2 | 0 | 0 | 0 | 108 | 67  | 51 | 7.6  | 7.5  | 7.55 | 92  | 12 | 1.17 | 150 | 77  | 41 | 95  | 5.2  | 0 |
| 2 | 31 | 18.9 | 69   | 2 | 1 | 1 | 0 | 0 | 0 | 135 | 89  | 74 | 8    | 7.4  | 7.7  | 74  | 18 | 0.65 | 232 | 67  | 75 | 139 | 5    | 1 |
| 1 | 70 | 23.3 | 95   | 1 | 2 | 2 | 1 | 0 | 1 | 131 | 97  | 63 | 9.2  | 8.5  | 8.85 | 93  | 20 | 0.78 | 228 | 294 | 52 | 139 | 5.4  | 0 |
| 1 | 56 | 22.4 | 80.5 | 2 | 1 | 1 | 1 | 0 | 1 | 134 | 93  | 60 | 8.2  | 8.1  | 8.15 | 102 | 11 | 0.85 | 284 | 88  | 41 | 230 | 5.7  | 1 |
| 1 | 61 | 26.2 | 88   | 1 | 2 | 1 | 1 | 0 | 0 | 127 | 88  | 61 | 7.7  | 8.1  | 7.9  | 112 | 19 | 1.03 | 177 | 73  | 56 | 112 | 5.5  | 0 |
| 1 | 47 | 29.3 | 107  | 2 | 1 | 1 | 0 | 0 | 1 | 139 | 88  | 77 | 7.9  | 8.1  | 8    | 99  | 13 | 1.02 | 222 | 96  | 45 | 164 | 5.3  | 0 |
| 1 | 74 | 20.1 | 77   | 2 | 2 | 1 | 1 | 0 | 0 | 126 | 79  | 55 | 10.6 | 9.8  | 10.2 | 112 | 17 | 1.09 | 238 | 179 | 57 | 157 | 6.4  | 1 |
| 1 | 58 | 26.5 | 94   | 2 | 1 | 2 | 1 | 0 | 1 | 128 | 95  | 53 | 7.7  | 7.2  | 7.45 | 99  | 12 | 1.04 | 170 | 124 | 37 | 105 | 5.8  | 1 |
| 2 | 47 | 25.6 | 87   | 1 | 1 | 1 | 0 | 0 | 0 | 128 | 81  | 65 | 6    | 5.9  | 5.95 | 97  | 11 | 0.8  | 169 | 150 | 46 | 102 | 5.3  | 0 |
| 1 | 65 | 29.1 | 108  | 1 | 2 | 1 | 1 | 1 | 1 | 153 | 101 | 66 | 10.7 | 11.1 | 10.9 | 135 | 17 | 0.92 | 207 | 91  | 60 | 131 | 5.3  | 1 |
| 2 | 63 | 20.8 | 77   | 1 | 1 | 2 | 0 | 0 | 0 | 110 | 79  | 53 | 9.4  | 9.3  | 9.35 | 86  | 16 | 0.59 | 197 | 68  | 65 | 103 | 5.4  | 0 |
| 1 | 50 | 22.5 | 87   | 1 | 1 | 1 | 0 | 0 | 0 | 104 | 72  | 50 | 7.6  | 7.6  | 7.6  | 82  | 15 | 0.94 | 201 | 59  | 69 | 116 | 5.4  | 0 |
| 1 | 59 | 27.3 | 93   | 2 | 2 | 1 | 1 | 0 | 1 | 110 | 77  | 71 | 7.6  | 7.8  | 7.7  | 119 | 17 | 0.95 | 203 | 151 | 42 | 141 | 5.8  | 1 |
| 2 | 55 | 23.9 | 81   | 1 | 1 | 1 | 0 | 0 | 1 | 117 | 79  | 64 | 6.9  | 7.2  | 7.05 | 90  | 15 | 0.64 | 251 | 173 | 69 | 143 | 5.6  | 0 |
| 1 | 49 | 21.7 | 87   | 2 | 2 | 1 | 0 | 0 | 0 | 123 | 81  | 56 | 8.5  | 8.5  | 8.5  | 98  | 9  | 0.87 | 221 | 177 | 55 | 139 | 5.7  | 0 |
| 2 | 59 | 20.5 | 75.5 | 1 | 1 | 1 | 0 | 0 | 0 | 124 | 88  | 60 | 8.4  | 8.7  | 8.55 | 83  | 15 | 0.92 | 219 | 48  | 69 | 134 | 5.6  | 0 |
| 1 | 55 | 28.3 | 97.5 | 2 | 2 | 2 | 1 | 0 | 0 | 132 | 97  | 66 | 6.6  | 6.3  | 6.45 | 77  | 12 | 0.67 | 168 | 44  | 66 | 93  | 5.7  | 1 |
| 2 | 79 | 25.2 | 94   | 1 | 1 | 1 | 1 | 1 | 0 | 137 | 82  | 91 | 10.3 | 9.7  | 10   | 174 | 21 | 0.65 | 234 | 128 | 54 | 158 | 7.8  | 1 |
| 2 | 63 | 26.6 | 92   | 1 | 1 | 2 | 1 | 0 | 1 | 140 | 87  | 62 | 9.3  | 7.7  | 8.5  | 97  | 11 | 0.65 | 293 | 160 | 56 | 213 | 6    | 1 |
| 2 | 51 | 29.2 | 101  | 1 | 1 | 1 | 0 | 1 | 1 | 119 | 81  | 75 | 7.3  | 7.1  | 7.2  | 171 | 17 | 0.56 | 266 | 294 | 48 | 160 | 10.6 | 1 |
| 2 | 74 | 25.2 | 88.5 | 1 | 1 | 2 | 1 | 0 | 0 | 143 | 83  | 80 | 8.9  | 9.1  | 9    | 81  | 18 | 0.74 | 174 | 67  | 47 | 111 | 5.7  | 1 |
| 2 | 57 | 24.0 | 83   | 1 | 1 | 1 | 1 | 0 | 0 | 136 | 92  | 64 | 10.1 | 9.7  | 9.9  | 109 | 19 | 0.63 | 237 | 81  | 70 | 145 | 5.8  | 1 |
| 1 | 39 | 25.6 | 92   | 2 | 2 | 2 | 0 | 0 | 1 | 118 | 81  | 62 | 8.1  | 7.7  | 7.9  | 108 | 13 | 0.86 | 222 | 189 | 43 | 153 | 5.5  | 1 |

|   |    |      |      |   |   |   |   |   |   |     |     |    |      |      |       |     |    |      |     |     |    |     |     |   |
|---|----|------|------|---|---|---|---|---|---|-----|-----|----|------|------|-------|-----|----|------|-----|-----|----|-----|-----|---|
| 2 | 57 | 26.8 | 86.5 | 2 | 1 | 1 | 1 | 0 | 0 | 154 | 91  | 60 | 7.5  | 7.4  | 7.45  | 89  | 18 | 0.77 | 200 | 197 | 58 | 106 | 5.4 | 1 |
| 1 | 63 | 24.7 | 93.5 | 2 | 1 | 1 | 1 | 0 | 1 | 117 | 85  | 66 | 8.4  | 7.5  | 7.95  | 86  | 15 | 0.96 | 240 | 83  | 56 | 169 | 5.5 | 1 |
| 1 | 55 | 26.3 | 95   | 2 | 1 | 1 | 1 | 1 | 0 | 144 | 98  | 61 | 9.8  | 9    | 9.4   | 153 | 12 | 0.82 | 167 | 181 | 45 | 102 | 8.1 | 1 |
| 2 | 62 | 19.9 | 84   | 1 | 1 | 1 | 0 | 0 | 1 | 111 | 77  | 73 | 7.1  | 7.2  | 7.15  | 101 | 10 | 0.75 | 235 | 80  | 49 | 163 | 5.4 | 1 |
| 1 | 55 | 23.0 | 84   | 1 | 1 | 2 | 1 | 0 | 0 | 139 | 92  | 55 | 6.3  | 6.2  | 6.25  | 90  | 11 | 0.88 | 211 | 80  | 53 | 135 | 5.6 | 1 |
| 1 | 55 | 23.8 | 89   | 1 | 1 | 2 | 1 | 0 | 0 | 133 | 91  | 65 | 7.5  | 7.1  | 7.3   | 100 | 15 | 1.07 | 208 | 132 | 46 | 140 | 5.2 | 0 |
| 1 | 48 | 24.7 | 85   | 2 | 1 | 1 | 1 | 0 | 0 | 134 | 94  | 61 | 8.1  | 7.8  | 7.95  | 97  | 21 | 0.97 | 190 | 128 | 49 | 120 | 5.1 | 1 |
| 2 | 71 | 27.6 | 91.5 | 1 | 1 | 2 | 1 | 0 | 1 | 150 | 101 | 61 | 10.4 | 9.5  | 9.95  | 88  | 19 | 0.65 | 187 | 192 | 36 | 117 | 5.9 | 0 |
| 1 | 48 | 25.1 | 92   | 2 | 2 | 1 | 1 | 1 | 1 | 137 | 90  | 66 | 8.3  | 8.1  | 8.2   | 145 | 16 | 0.69 | 208 | 227 | 49 | 112 | 7.8 | 1 |
| 1 | 60 | 23.2 | 86   | 1 | 1 | 2 | 1 | 0 | 0 | 139 | 91  | 81 | 7.7  | 7.7  | 7.7   | 99  | 18 | 0.97 | 189 | 82  | 65 | 105 | 6.1 | 0 |
| 2 | 79 | 23.1 | 84.5 | 1 | 1 | 1 | 1 | 0 | 1 | 160 | 93  | 67 | 10.5 | 10.2 | 10.35 | 101 | 16 | 0.62 | 208 | 157 | 67 | 108 | 5.8 | 1 |
| 1 | 62 | 25.2 | 84   | 2 | 2 | 1 | 1 | 0 | 1 | 150 | 104 | 62 | 8    | 7.4  | 7.7   | 104 | 16 | 0.77 | 238 | 124 | 67 | 148 | 5.4 | 1 |
| 1 | 58 | 25.9 | 93.5 | 2 | 2 | 1 | 1 | 1 | 0 | 129 | 84  | 71 | 9    | 10.6 | 9.8   | 137 | 12 | 0.69 | 188 | 108 | 43 | 126 | 7.3 | 0 |
| 2 | 60 | 26.5 | 93   | 1 | 1 | 1 | 0 | 1 | 1 | 115 | 73  | 62 | 9.3  | 9.2  | 9.25  | 123 | 19 | 0.74 | 211 | 134 | 65 | 121 | 7.1 | 1 |
| 2 | 31 | 16.2 | 59   | 1 | 1 | 1 | 0 | 0 | 0 | 108 | 70  | 62 | 7.1  | 7.1  | 7.1   | 76  | 13 | 0.72 | 166 | 41  | 63 | 92  | 5.3 | 0 |
| 2 | 61 | 22.1 | 77   | 1 | 1 | 1 | 0 | 0 | 0 | 126 | 77  | 69 | 7.1  | 6.7  | 6.9   | 100 | 13 | 0.67 | 217 | 89  | 65 | 136 | 5.7 | 0 |
| 1 | 40 | 25.0 | 82   | 2 | 1 | 1 | 0 | 0 | 1 | 120 | 69  | 79 | 7    | 6.9  | 6.95  | 74  | 12 | 1.21 | 185 | 250 | 28 | 60  | 5.4 | 1 |
| 2 | 59 | 28.6 | 95.5 | 2 | 1 | 1 | 1 | 0 | 1 | 124 | 91  | 68 | 7.9  | 7.8  | 7.85  | 96  | 11 | 0.76 | 248 | 143 | 47 | 164 | 5.5 | 1 |
| 1 | 50 | 23.9 | 90   | 1 | 2 | 1 | 1 | 0 | 0 | 123 | 84  | 73 | 6.7  | 6.5  | 6.6   | 107 | 13 | 0.83 | 136 | 89  | 43 | 83  | 5.9 | 0 |
| 1 | 55 | 25.1 | 93   | 2 | 1 | 2 | 1 | 0 | 1 | 124 | 88  | 80 | 9    | 8.8  | 8.9   | 107 | 33 | 1.15 | 137 | 74  | 36 | 93  | 5.8 | 0 |
| 2 | 53 | 24.6 | 79   | 1 | 1 | 2 | 0 | 0 | 1 | 108 | 80  | 75 | 6.9  | 6.8  | 6.85  | 73  | 23 | 0.72 | 256 | 49  | 57 | 190 | 5.5 | 0 |
| 1 | 53 | 27.6 | 97   | 2 | 2 | 1 | 0 | 1 | 1 | 123 | 87  | 61 | 7.1  | 7.4  | 7.25  | 110 | 11 | 0.99 | 146 | 274 | 37 | 78  | 7   | 1 |
| 1 | 45 | 22.4 | 84   | 1 | 1 | 1 | 0 | 0 | 1 | 116 | 83  | 65 | 8    | 7.8  | 7.9   | 94  | 11 | 1.01 | 215 | 262 | 48 | 131 | 5.4 | 1 |
| 2 | 49 | 20.6 | 71.5 | 1 | 1 | 1 | 0 | 0 | 0 | 112 | 74  | 67 | 8    | 8.1  | 8.05  | 83  | 9  | 0.68 | 185 | 44  | 57 | 111 | 5.3 | 1 |
| 2 | 58 | 29.1 | 89   | 1 | 1 | 1 | 1 | 0 | 0 | 140 | 96  | 59 | 7.6  | 7.2  | 7.4   | 101 | 10 | 0.63 | 206 | 121 | 58 | 130 | 6.1 | 1 |
| 1 | 72 | 23.2 | 89   | 1 | 1 | 1 | 1 | 0 | 1 | 148 | 88  | 72 | 8.9  | 9.4  | 9.15  | 78  | 16 | 1.43 | 245 | 96  | 55 | 191 | 5.5 | 0 |
| 1 | 40 | 25.4 | 92   | 1 | 2 | 2 | 0 | 0 | 1 | 124 | 73  | 73 | 6.4  | 6.2  | 6.3   | 77  | 17 | 1.08 | 219 | 72  | 73 | 137 | 5.7 | 1 |
| 2 | 49 | 27.2 | 88   | 1 | 1 | 1 | 0 | 0 | 0 | 109 | 76  | 75 | 7.4  | 7.2  | 7.3   | 85  | 14 | 0.54 | 199 | 33  | 56 | 139 | 5.4 | 0 |
| 1 | 55 | 23.8 | 90.5 | 2 | 2 | 1 | 1 | 0 | 0 | 129 | 81  | 72 | 8.6  | 8.1  | 8.35  | 90  | 12 | 0.64 | 160 | 66  | 75 | 84  | 5.3 | 0 |

|   |    |      |      |   |   |   |   |   |   |     |     |    |      |      |      |     |    |      |     |     |    |     |     |   |
|---|----|------|------|---|---|---|---|---|---|-----|-----|----|------|------|------|-----|----|------|-----|-----|----|-----|-----|---|
| 2 | 54 | 19.4 | 75   | 1 | 1 | 2 | 0 | 0 | 0 | 102 | 66  | 55 | 8    | 7.7  | 7.85 | 92  | 13 | 0.66 | 186 | 77  | 44 | 125 | 5.7 | 0 |
| 1 | 48 | 27.3 | 94   | 1 | 2 | 1 | 1 | 0 | 1 | 133 | 99  | 62 | 6.5  | 10   | 8.25 | 88  | 12 | 0.85 | 153 | 119 | 36 | 106 | 5.5 | 0 |
| 1 | 75 | 22.4 | 91   | 1 | 1 | 1 | 0 | 0 | 0 | 131 | 83  | 53 | 10.1 | 10.7 | 10.4 | 91  | 20 | 0.96 | 145 | 65  | 43 | 91  | 6.1 | 1 |
| 2 | 55 | 26.4 | 94   | 1 | 1 | 1 | 1 | 1 | 1 | 118 | 87  | 67 | 7.2  | 7.2  | 7.2  | 133 | 23 | 0.81 | 151 | 76  | 59 | 75  | 6.5 | 1 |
| 1 | 53 | 26.2 | 96   | 2 | 2 | 1 | 1 | 0 | 1 | 145 | 99  | 62 | 8.7  | 8.6  | 8.65 | 87  | 15 | 0.71 | 186 | 319 | 40 | 99  | 5.3 | 0 |
| 1 | 49 | 24.6 | 87   | 2 | 1 | 1 | 0 | 0 | 1 | 121 | 82  | 71 | 6.8  | 6.3  | 6.55 | 96  | 15 | 0.9  | 243 | 147 | 58 | 148 | 5.5 | 0 |
| 1 | 43 | 26.0 | 96   | 2 | 2 | 1 | 0 | 1 | 1 | 124 | 85  | 92 | 8    | 6.7  | 7.35 | 133 | 7  | 0.77 | 207 | 208 | 42 | 145 | 5.9 | 1 |
| 1 | 59 | 21.0 | 83   | 2 | 2 | 1 | 0 | 0 | 1 | 121 | 87  | 64 | 8    | 8    | 8    | 96  | 12 | 0.82 | 282 | 143 | 70 | 181 | 5.4 | 1 |
| 1 | 44 | 26.2 | 98   | 2 | 1 | 1 | 1 | 0 | 0 | 140 | 97  | 79 | 6.3  | 6.2  | 6.25 | 117 | 12 | 0.87 | 222 | 177 | 49 | 152 | 6   | 0 |
| 2 | 68 | 33.8 | 104  | 1 | 1 | 1 | 1 | 1 | 1 | 128 | 83  | 66 | 7.3  | 7.6  | 7.45 | 104 | 20 | 0.69 | 145 | 128 | 44 | 82  | 6.5 | 1 |
| 2 | 66 | 26.3 | 98   | 1 | 1 | 2 | 1 | 1 | 1 | 139 | 75  | 60 | 9.4  | 9.2  | 9.3  | 118 | 15 | 0.83 | 157 | 110 | 65 | 70  | 6.8 | 1 |
| 1 | 60 | 26.9 | 103  | 1 | 1 | 1 | 1 | 0 | 1 | 129 | 87  | 56 | 7.4  | 7.2  | 7.3  | 104 | 13 | 0.99 | 293 | 160 | 49 | 216 | 5.6 | 0 |
| 2 | 56 | 21.3 | 83   | 1 | 1 | 1 | 0 | 0 | 1 | 107 | 68  | 62 | 7.7  | 8.1  | 7.9  | 85  | 15 | 0.8  | 242 | 71  | 60 | 163 | 5.5 | 1 |
| 1 | 61 | 24.2 | 85   | 1 | 2 | 1 | 0 | 0 | 0 | 124 | 86  | 54 | 7.4  | 7.1  | 7.25 | 101 | 11 | 1.05 | 205 | 105 | 54 | 126 | 5.9 | 0 |
| 2 | 54 | 23.1 | 86   | 1 | 1 | 1 | 0 | 0 | 0 | 107 | 71  | 45 | 8.2  | 8.5  | 8.35 | 107 | 10 | 0.63 | 196 | 190 | 47 | 108 | 5.7 | 0 |
| 1 | 60 | 21.8 | 83.5 | 1 | 1 | 1 | 1 | 0 | 0 | 145 | 95  | 48 | 7.7  | 7.6  | 7.65 | 95  | 17 | 0.65 | 144 | 77  | 55 | 81  | 5.4 | 1 |
| 1 | 48 | 24.3 | 92.5 | 2 | 2 | 1 | 0 | 0 | 1 | 112 | 75  | 72 | 7.2  | 7.3  | 7.25 | 101 | 12 | 0.78 | 183 | 225 | 53 | 91  | 5.4 | 0 |
| 2 | 56 | 20.6 | 73   | 1 | 1 | 1 | 0 | 0 | 0 | 109 | 71  | 55 | 7.7  | 7.7  | 7.7  | 84  | 16 | 0.73 | 186 | 96  | 58 | 105 | 6   | 0 |
| 1 | 63 | 18.7 | 70   | 2 | 1 | 1 | 0 | 1 | 1 | 117 | 76  | 71 | 9.2  | 9.1  | 9.15 | 95  | 15 | 0.67 | 150 | 92  | 37 | 96  | 6.5 | 0 |
| 1 | 60 | 22.8 | 85.3 | 2 | 2 | 1 | 1 | 0 | 0 | 138 | 93  | 53 | 8.7  | 9.2  | 8.95 | 109 | 24 | 0.88 | 193 | 158 | 41 | 130 | 5.8 | 0 |
| 2 | 57 | 23.4 | 85   | 1 | 1 | 2 | 0 | 1 | 1 | 129 | 82  | 66 | 8.7  | 8.2  | 8.45 | 131 | 12 | 0.68 | 177 | 231 | 44 | 95  | 8.3 | 1 |
| 2 | 58 | 24.0 | 85   | 1 | 1 | 1 | 1 | 0 | 0 | 147 | 87  | 87 | 7.4  | 7.7  | 7.55 | 124 | 13 | 0.76 | 208 | 49  | 56 | 143 | 6.1 | 0 |
| 1 | 60 | 23.3 | 81   | 1 | 1 | 1 | 0 | 1 | 1 | 112 | 73  | 61 | 7.7  | 7.7  | 7.7  | 125 | 15 | 0.92 | 117 | 113 | 37 | 71  | 7.4 | 0 |
| 1 | 52 | 28.4 | 102  | 2 | 1 | 1 | 1 | 0 | 1 | 148 | 107 | 80 | 7.5  | 7.6  | 7.55 | 109 | 9  | 0.95 | 210 | 479 | 51 | 109 | 6.3 | 0 |
| 1 | 57 | 25.7 | 88   | 2 | 1 | 1 | 1 | 0 | 1 | 128 | 90  | 60 | 7.8  | 7.8  | 7.8  | 109 | 12 | 0.93 | 283 | 53  | 50 | 233 | 5.5 | 1 |
| 2 | 57 | 22.2 | 82.5 | 1 | 1 | 1 | 1 | 0 | 1 | 155 | 93  | 88 | 6.8  | 6.5  | 6.65 | 108 | 12 | 0.73 | 315 | 131 | 62 | 225 | 5.7 | 1 |
| 2 | 50 | 26.7 | 96   | 1 | 1 | 1 | 0 | 0 | 0 | 110 | 85  | 57 | 6.4  | 6.3  | 6.35 | 94  | 14 | 0.63 | 162 | 81  | 62 | 92  | 5.7 | 0 |
| 1 | 59 | 23.8 | 85   | 1 | 2 | 1 | 1 | 0 | 0 | 116 | 84  | 81 | 8.3  | 8.3  | 8.3  | 95  | 15 | 1.1  | 127 | 51  | 42 | 75  | 5.6 | 1 |
| 2 | 74 | 24.9 | 93   | 1 | 1 | 1 | 1 | 1 | 1 | 148 | 84  | 58 | 10.7 | 10.9 | 10.8 | 101 | 25 | 0.73 | 170 | 102 | 46 | 101 | 7   | 0 |

|   |    |      |      |   |   |   |   |   |   |     |     |    |      |      |      |     |    |      |     |     |    |     |     |   |
|---|----|------|------|---|---|---|---|---|---|-----|-----|----|------|------|------|-----|----|------|-----|-----|----|-----|-----|---|
| 1 | 46 | 31.5 | 104  | 1 | 2 | 1 | 1 | 1 | 1 | 147 | 97  | 90 | 7.3  | 6.8  | 7.05 | 128 | 14 | 0.82 | 161 | 246 | 48 | 79  | 6.9 | 0 |
| 1 | 39 | 29.7 | 112  | 1 | 2 | 1 | 0 | 0 | 0 | 128 | 87  | 46 | 7.5  | 7    | 7.25 | 106 | 15 | 0.76 | 193 | 155 | 40 | 132 | 5.8 | 1 |
| 2 | 37 | 18.4 | 72.5 | 1 | 1 | 2 | 0 | 0 | 0 | 94  | 66  | 61 | 5.4  | 5.4  | 5.4  | 85  | 14 | 0.75 | 160 | 45  | 68 | 81  | 5.4 | 0 |
| 2 | 47 | 19.1 | 73   | 1 | 1 | 1 | 1 | 0 | 0 | 140 | 83  | 68 | 7.8  | 7.7  | 7.75 | 84  | 13 | 0.73 | 191 | 47  | 75 | 98  | 5.3 | 1 |
| 2 | 43 | 18.1 | 66   | 1 | 1 | 1 | 0 | 0 | 0 | 135 | 82  | 64 | 7.5  | 7.6  | 7.55 | 81  | 14 | 0.84 | 226 | 54  | 89 | 119 | 5.3 | 1 |
| 1 | 89 | 21.9 | 84   | 2 | 1 | 1 | 1 | 1 | 1 | 151 | 78  | 68 | 12.2 | 10.4 | 11.3 | 131 | 19 | 0.89 | 170 | 83  | 42 | 116 | 7.6 | 1 |
| 2 | 38 | 21.8 | 83   | 1 | 1 | 1 | 0 | 0 | 0 | 122 | 86  | 56 | 6.5  | 6.3  | 6.4  | 84  | 11 | 0.71 | 176 | 51  | 63 | 99  | 5.6 | 0 |
| 2 | 45 | 19.6 | 74   | 1 | 1 | 1 | 1 | 0 | 0 | 140 | 100 | 72 | 7    | 7.1  | 7.05 | 91  | 9  | 0.67 | 220 | 54  | 79 | 124 | 5.4 | 1 |
| 2 | 64 | 17.1 | 71   | 1 | 1 | 1 | 1 | 0 | 0 | 137 | 91  | 62 | 7.2  | 6.9  | 7.05 | 92  | 18 | 0.78 | 238 | 43  | 74 | 145 | 5.5 | 1 |
| 2 | 57 | 24.8 | 76.5 | 1 | 1 | 1 | 0 | 0 | 1 | 129 | 79  | 66 | 6.9  | 7    | 6.95 | 87  | 9  | 0.69 | 143 | 70  | 39 | 96  | 5.3 | 0 |
| 1 | 45 | 28.0 | 96.8 | 1 | 2 | 1 | 1 | 0 | 0 | 140 | 94  | 61 | 8    | 7.6  | 7.8  | 106 | 13 | 1.01 | 210 | 162 | 56 | 133 | 5.4 | 1 |
| 2 | 67 | 24.2 | 88   | 1 | 1 | 1 | 1 | 0 | 0 | 113 | 78  | 61 | 8.5  | 8.2  | 8.35 | 98  | 15 | 0.72 | 239 | 113 | 75 | 131 | 5.6 | 0 |
| 1 | 51 | 26.1 | 89   | 1 | 2 | 1 | 1 | 0 | 0 | 112 | 74  | 73 | 6.7  | 6.2  | 6.45 | 104 | 22 | 0.91 | 172 | 74  | 48 | 117 | 5.4 | 1 |
| 1 | 49 | 21.9 | 83   | 1 | 1 | 1 | 1 | 1 | 1 | 134 | 95  | 75 | 7.5  | 7.4  | 7.45 | 156 | 11 | 0.75 | 253 | 239 | 48 | 164 | 7.1 | 0 |
| 1 | 49 | 23.7 | 84   | 2 | 2 | 1 | 0 | 0 | 0 | 118 | 85  | 53 | 8.7  | 8.3  | 8.5  | 106 | 21 | 1.03 | 218 | 194 | 52 | 146 | 5.5 | 0 |
| 1 | 39 | 22.8 | 86   | 1 | 1 | 1 | 0 | 0 | 0 | 122 | 84  | 66 | 7.1  | 6.9  | 7    | 99  | 12 | 1.1  | 186 | 122 | 44 | 127 | 5.5 | 0 |
| 1 | 40 | 22.0 | 77   | 2 | 1 | 1 | 0 | 0 | 0 | 109 | 59  | 48 | 7.6  | 7.4  | 7.5  | 74  | 13 | 1.11 | 158 | 45  | 49 | 99  | 5.2 | 0 |
| 2 | 53 | 26.3 | 97   | 1 | 2 | 1 | 1 | 0 | 0 | 135 | 91  | 64 | 8.5  | 8.5  | 8.5  | 101 | 16 | 0.78 | 167 | 157 | 51 | 95  | 5.7 | 0 |
| 1 | 51 | 25.1 | 90   | 1 | 1 | 1 | 1 | 0 | 0 | 111 | 75  | 62 | 7.6  | 7.6  | 7.6  | 100 | 15 | 1.14 | 212 | 104 | 47 | 148 | 5.3 | 1 |
| 1 | 60 | 20.5 | 80   | 1 | 1 | 1 | 0 | 0 | 1 | 118 | 81  | 71 | 7.1  | 7.1  | 7.1  | 87  | 15 | 1.12 | 203 | 59  | 49 | 144 | 5.5 | 1 |
| 2 | 56 | 22.1 | 78.5 | 1 | 1 | 1 | 0 | 0 | 1 | 131 | 81  | 56 | 7.8  | 7.8  | 7.8  | 73  | 12 | 0.75 | 249 | 131 | 59 | 156 | 5.6 | 1 |
| 1 | 59 | 27.8 | 100  | 1 | 1 | 1 | 1 | 0 | 1 | 135 | 86  | 55 | 7.7  | 7.4  | 7.55 | 106 | 20 | 0.83 | 177 | 118 | 39 | 122 | 6.1 | 0 |
| 2 | 61 | 29.3 | 101  | 1 | 1 | 1 | 0 | 0 | 1 | 130 | 87  | 66 | 7.5  | 7.4  | 7.45 | 110 | 14 | 0.86 | 266 | 147 | 49 | 193 | 6.4 | 1 |
| 2 | 60 | 24.1 | 83   | 1 | 1 | 1 | 1 | 0 | 0 | 149 | 94  | 63 | 7.8  | 7    | 7.4  | 92  | 14 | 0.52 | 195 | 129 | 44 | 128 | 5.8 | 0 |
| 1 | 63 | 27.4 | 98   | 2 | 2 | 1 | 1 | 0 | 1 | 121 | 84  | 75 | 8.6  | 8.6  | 8.6  | 83  | 10 | 0.69 | 139 | 116 | 47 | 81  | 5.3 | 1 |
| 1 | 48 | 25.0 | 88   | 1 | 1 | 1 | 0 | 0 | 0 | 127 | 85  | 66 | 7.7  | 7.7  | 7.7  | 94  | 11 | 0.95 | 193 | 115 | 48 | 135 | 5.3 | 1 |
| 1 | 63 | 21.0 | 82   | 2 | 2 | 1 | 1 | 0 | 0 | 135 | 96  | 48 | 8.1  | 8    | 8.05 | 104 | 13 | 0.84 | 190 | 102 | 43 | 128 | 5.4 | 1 |
| 1 | 49 | 26.0 | 86.5 | 1 | 1 | 1 | 0 | 0 | 1 | 125 | 81  | 60 | 7.1  | 6.7  | 6.9  | 103 | 15 | 1.19 | 205 | 96  | 39 | 154 | 5.9 | 1 |
| 2 | 70 | 26.1 | 95   | 1 | 1 | 1 | 0 | 0 | 1 | 112 | 74  | 55 | 7.3  | 7.3  | 7.3  | 97  | 13 | 0.69 | 202 | 62  | 63 | 124 | 5.8 | 1 |

|   |    |      |      |   |   |   |   |   |   |     |     |    |      |     |      |     |    |      |     |     |    |     |     |   |
|---|----|------|------|---|---|---|---|---|---|-----|-----|----|------|-----|------|-----|----|------|-----|-----|----|-----|-----|---|
| 2 | 39 | 25.0 | 87   | 1 | 1 | 1 | 0 | 0 | 0 | 115 | 79  | 72 | 7.1  | 7.1 | 7.1  | 90  | 12 | 0.72 | 200 | 100 | 41 | 146 | 6   | 0 |
| 1 | 51 | 25.5 | 91   | 2 | 1 | 1 | 0 | 0 | 0 | 126 | 74  | 57 | 8    | 7.9 | 7.95 | 93  | 14 | 0.78 | 208 | 66  | 61 | 135 | 5.4 | 1 |
| 1 | 43 | 29.1 | 96.5 | 2 | 1 | 1 | 1 | 0 | 1 | 144 | 93  | 92 | 8    | 7.9 | 7.95 | 117 | 12 | 1.01 | 206 | 429 | 37 | 118 | 5.6 | 1 |
| 1 | 50 | 19.4 | 77.6 | 2 | 1 | 2 | 0 | 0 | 0 | 117 | 77  | 81 | 8.3  | 8.6 | 8.45 | 91  | 20 | 0.89 | 173 | 36  | 51 | 112 | 5.8 | 0 |
| 1 | 53 | 24.4 | 87   | 1 | 1 | 1 | 1 | 1 | 1 | 129 | 76  | 61 | 7.2  | 7.6 | 7.4  | 168 | 19 | 0.91 | 161 | 176 | 69 | 80  | 6.2 | 0 |
| 2 | 48 | 22.3 | 79   | 1 | 1 | 2 | 0 | 0 | 0 | 102 | 65  | 45 | 7.4  | 7.4 | 7.4  | 67  | 17 | 0.7  | 207 | 30  | 69 | 129 | 5.4 | 1 |
| 1 | 53 | 30.1 | 103  | 1 | 1 | 1 | 1 | 1 | 1 | 154 | 106 | 59 | 9.5  | 8.5 | 9    | 164 | 24 | 1.28 | 185 | 284 | 51 | 97  | 8.2 | 1 |
| 1 | 49 | 24.7 | 88   | 2 | 1 | 2 | 0 | 0 | 0 | 126 | 79  | 78 | 7.9  | 7.8 | 7.85 | 96  | 11 | 1.01 | 179 | 145 | 40 | 113 | 5.3 | 1 |
| 1 | 51 | 24.1 | 80   | 1 | 2 | 2 | 0 | 0 | 0 | 101 | 64  | 50 | 7.2  | 7.3 | 7.25 | 92  | 10 | 0.91 | 142 | 54  | 56 | 75  | 5.3 | 1 |
| 2 | 50 | 28.4 | 93.5 | 1 | 1 | 2 | 1 | 0 | 1 | 136 | 90  | 49 | 7.8  | 7.6 | 7.7  | 123 | 15 | 0.79 | 254 | 159 | 41 | 184 | 6.4 | 0 |
| 1 | 62 | 22.9 | 90   | 2 | 1 | 1 | 0 | 0 | 0 | 124 | 79  | 62 | 8.3  | 8.6 | 8.45 | 95  | 28 | 0.92 | 192 | 51  | 66 | 119 | 5.4 | 1 |
| 1 | 63 | 16.7 | 74.5 | 2 | 2 | 1 | 1 | 0 | 0 | 127 | 92  | 75 | 8.3  | 8.2 | 8.25 | 88  | 11 | 0.89 | 171 | 79  | 46 | 103 | 5.4 | 1 |
| 1 | 42 | 22.2 | 83   | 2 | 1 | 1 | 1 | 0 | 1 | 146 | 105 | 84 | 8.3  | 7.7 | 8    | 98  | 14 | 0.97 | 226 | 131 | 42 | 165 | 5.7 | 0 |
| 1 | 62 | 26.0 | 90.5 | 1 | 1 | 1 | 1 | 0 | 1 | 108 | 76  | 52 | 7.7  | 7.7 | 7.7  | 109 | 15 | 0.85 | 216 | 118 | 36 | 154 | 5.5 | 1 |
| 1 | 52 | 21.6 | 74.8 | 2 | 2 | 1 | 0 | 0 | 1 | 123 | 78  | 54 | 8.6  | 8.6 | 8.6  | 98  | 13 | 0.76 | 176 | 52  | 56 | 102 | 5.5 | 1 |
| 2 | 47 | 25.2 | 87   | 1 | 1 | 2 | 0 | 0 | 1 | 103 | 69  | 81 | 6.9  | 6.8 | 6.85 | 90  | 15 | 0.86 | 184 | 85  | 50 | 110 | 5.8 | 0 |
| 1 | 58 | 23.4 | 88   | 2 | 1 | 1 | 0 | 0 | 1 | 117 | 79  | 58 | 8.4  | 8.2 | 8.3  | 97  | 14 | 0.93 | 218 | 203 | 46 | 145 | 5.4 | 0 |
| 2 | 65 | 20.7 | 73   | 1 | 1 | 1 | 0 | 0 | 0 | 131 | 75  | 68 | 8.9  | 8.9 | 8.9  | 85  | 21 | 0.62 | 221 | 139 | 53 | 134 | 6.2 | 0 |
| 2 | 62 | 21.8 | 77.2 | 1 | 1 | 1 | 1 | 0 | 0 | 137 | 81  | 66 | 9    | 8.6 | 8.8  | 94  | 13 | 0.59 | 230 | 53  | 67 | 144 | 5.9 | 1 |
| 1 | 45 | 26.2 | 91   | 2 | 1 | 1 | 0 | 0 | 1 | 124 | 81  | 64 | 8.1  | 7.8 | 7.95 | 94  | 14 | 0.97 | 254 | 305 | 45 | 158 | 5.4 | 1 |
| 2 | 58 | 18.4 | 62   | 1 | 1 | 1 | 0 | 0 | 0 | 116 | 69  | 66 | 7.7  | 7.9 | 7.8  | 85  | 18 | 0.8  | 187 | 44  | 89 | 75  | 5.5 | 0 |
| 2 | 55 | 19.7 | 70.5 | 1 | 1 | 2 | 0 | 0 | 0 | 126 | 78  | 46 | 7.2  | 7   | 7.1  | 98  | 19 | 0.78 | 180 | 35  | 60 | 105 | 5.8 | 1 |
| 2 | 43 | 20.8 | 72   | 1 | 1 | 1 | 0 | 0 | 0 | 107 | 69  | 62 | 6.7  | 6.9 | 6.8  | 80  | 8  | 0.56 | 132 | 36  | 45 | 75  | 5   | 0 |
| 1 | 52 | 28.1 | 101  | 1 | 1 | 1 | 1 | 0 | 1 | 135 | 90  | 72 | 6.8  | 6.7 | 6.75 | 88  | 21 | 1.16 | 241 | 124 | 50 | 162 | 5.5 | 1 |
| 1 | 66 | 20.3 | 86   | 2 | 2 | 1 | 1 | 0 | 1 | 130 | 82  | 52 | 9.3  | 9.4 | 9.35 | 100 | 10 | 0.99 | 186 | 74  | 62 | 102 | 5.3 | 1 |
| 1 | 53 | 23.5 | 80   | 2 | 1 | 1 | 0 | 0 | 1 | 117 | 74  | 59 | 7.1  | 7.2 | 7.15 | 82  | 21 | 1.07 | 267 | 86  | 41 | 215 | 5.3 | 1 |
| 2 | 53 | 23.2 | 86   | 1 | 1 | 1 | 0 | 0 | 1 | 126 | 86  | 75 | 7.3  | 7.4 | 7.35 | 95  | 14 | 0.81 | 292 | 50  | 79 | 191 | 5   | 1 |
| 1 | 61 | 21.3 | 81.5 | 2 | 1 | 1 | 1 | 0 | 0 | 116 | 89  | 71 | 10.1 | 9.3 | 9.7  | 90  | 15 | 1.05 | 179 | 71  | 45 | 112 | 5.4 | 0 |
| 1 | 69 | 22.0 | 90   | 1 | 1 | 1 | 1 | 0 | 0 | 152 | 101 | 70 | 9.6  | 8.6 | 9.1  | 111 | 13 | 0.9  | 166 | 74  | 65 | 95  | 5.4 | 0 |



|   |    |      |       |   |   |   |   |   |   |     |    |     |      |      |      |     |    |      |     |     |    |     |     |   |
|---|----|------|-------|---|---|---|---|---|---|-----|----|-----|------|------|------|-----|----|------|-----|-----|----|-----|-----|---|
| 2 | 68 | 24.6 | 95    | 1 | 1 | 1 | 0 | 0 | 1 | 139 | 79 | 55  | 10.2 | 9.8  | 10   | 110 | 14 | 0.75 | 178 | 69  | 63 | 102 | 5.9 | 1 |
| 1 | 60 | 25.3 | 88    | 1 | 2 | 1 | 0 | 0 | 0 | 108 | 69 | 66  | 7.5  | 7.5  | 7.5  | 101 | 12 | 0.81 | 184 | 64  | 45 | 117 | 5.6 | 1 |
| 2 | 48 | 22.9 | 78    | 1 | 1 | 1 | 0 | 0 | 0 | 105 | 67 | 59  | 6.5  | 6.8  | 6.65 | 70  | 14 | 0.7  | 190 | 44  | 51 | 126 | 5.2 | 1 |
| 2 | 69 | 28.4 | 101.5 | 1 | 1 | 1 | 1 | 0 | 1 | 128 | 74 | 71  | 8.1  | 8.4  | 8.25 | 96  | 11 | 0.74 | 178 | 100 | 66 | 97  | 6   | 1 |
| 1 | 48 | 27.2 | 89.6  | 2 | 2 | 2 | 0 | 0 | 0 | 121 | 79 | 71  | 6.2  | 6.8  | 6.5  | 92  | 11 | 0.88 | 183 | 105 | 52 | 109 | 5.1 | 0 |
| 1 | 75 | 29.7 | 102.5 | 2 | 1 | 1 | 1 | 1 | 1 | 146 | 95 | 73  | 12.1 | 13.1 | 12.6 | 105 | 29 | 1.29 | 217 | 120 | 49 | 149 | 7.1 | 1 |
| 2 | 60 | 31.3 | 103   | 1 | 1 | 1 | 1 | 0 | 1 | 119 | 75 | 70  | 9.1  | 8.6  | 8.85 | 100 | 19 | 1.09 | 256 | 430 | 41 | 140 | 5.7 | 1 |
| 1 | 68 | 25.6 | 99    | 2 | 1 | 2 | 1 | 1 | 1 | 150 | 96 | 90  | 10.9 | 10.9 | 10.9 | 237 | 17 | 1.03 | 185 | 97  | 51 | 122 | 7.6 | 1 |
| 1 | 54 | 20.9 | 77    | 1 | 1 | 1 | 0 | 0 | 1 | 115 | 78 | 57  | 7.2  | 7.1  | 7.15 | 92  | 17 | 0.89 | 167 | 60  | 69 | 83  | 5.4 | 0 |
| 2 | 48 | 20.7 | 72.5  | 1 | 1 | 2 | 0 | 0 | 0 | 100 | 63 | 49  | 7.5  | 7.5  | 7.5  | 80  | 12 | 0.69 | 190 | 58  | 52 | 114 | 5.1 | 1 |
| 1 | 70 | 22.5 | 78    | 2 | 1 | 1 | 1 | 0 | 1 | 146 | 88 | 69  | 9.6  | 9.1  | 9.35 | 75  | 10 | 1.03 | 217 | 49  | 61 | 134 | 5.4 | 1 |
| 1 | 53 | 21.5 | 87.5  | 2 | 1 | 2 | 0 | 0 | 1 | 116 | 80 | 65  | 7.4  | 7.3  | 7.35 | 103 | 9  | 0.74 | 221 | 270 | 33 | 132 | 5.8 | 1 |
| 2 | 64 | 25.1 | 89.5  | 1 | 1 | 1 | 0 | 0 | 1 | 136 | 88 | 71  | 8.2  | 8.4  | 8.3  | 107 | 14 | 0.8  | 316 | 116 | 76 | 216 | 6   | 0 |
| 1 | 37 | 21.2 | 77    | 2 | 2 | 2 | 0 | 0 | 0 | 114 | 71 | 59  | 7.1  | 7.1  | 7.1  | 95  | 11 | 0.93 | 188 | 65  | 82 | 98  | 5.3 | 0 |
| 1 | 44 | 21.3 | 77    | 2 | 1 | 1 | 0 | 0 | 1 | 104 | 77 | 75  | 8.9  | 8.5  | 8.7  | 80  | 16 | 0.83 | 267 | 147 | 68 | 169 | 5.4 | 0 |
| 1 | 54 | 24.4 | 86.3  | 1 | 2 | 1 | 0 | 0 | 0 | 109 | 78 | 80  | 6.3  | 6.1  | 6.2  | 87  | 19 | 0.89 | 191 | 58  | 85 | 100 | 5.3 | 1 |
| 2 | 55 | 22.1 | 77.5  | 1 | 1 | 1 | 0 | 0 | 1 | 124 | 78 | 69  | 7.6  | 7.5  | 7.55 | 87  | 9  | 0.84 | 244 | 72  | 59 | 171 | 5.6 | 1 |
| 1 | 47 | 29.6 | 103.2 | 2 | 1 | 1 | 1 | 1 | 1 | 132 | 87 | 84  | 6.8  | 5.9  | 6.35 | 197 | 14 | 0.85 | 126 | 149 | 34 | 78  | 8.1 | 0 |
| 1 | 56 | 22.8 | 84.5  | 2 | 1 | 1 | 0 | 0 | 1 | 134 | 79 | 71  | 8.8  | 8.7  | 8.75 | 93  | 16 | 0.88 | 282 | 85  | 63 | 215 | 6   | 1 |
| 2 | 34 | 23.3 | 82    | 2 | 1 | 1 | 0 | 0 | 0 | 105 | 62 | 51  | 7.2  | 7.2  | 7.2  | 78  | 11 | 0.72 | 207 | 91  | 44 | 148 | 5.3 | 0 |
| 1 | 51 | 27.5 | 103.8 | 2 | 2 | 1 | 1 | 0 | 0 | 118 | 87 | 75  | 8.5  | 8.5  | 8.5  | 119 | 16 | 0.92 | 171 | 147 | 49 | 104 | 5.6 | 0 |
| 2 | 58 | 20.8 | 73.5  | 1 | 1 | 1 | 0 | 0 | 0 | 107 | 70 | 65  | 7.7  | 7.8  | 7.75 | 92  | 10 | 0.57 | 182 | 83  | 56 | 117 | 5.6 | 0 |
| 1 | 57 | 22.1 | 83    | 2 | 1 | 1 | 1 | 1 | 0 | 136 | 91 | 59  | 8.9  | 8.5  | 8.7  | 131 | 14 | 0.97 | 167 | 153 | 44 | 105 | 5.9 | 1 |
| 2 | 69 | 24.5 | 91.2  | 1 | 1 | 2 | 1 | 0 | 0 | 143 | 97 | 102 | 9.1  | 8.9  | 9    | 93  | 12 | 0.82 | 204 | 188 | 51 | 115 | 5.7 | 1 |
| 1 | 56 | 29.1 | 100   | 1 | 1 | 1 | 1 | 0 | 1 | 128 | 87 | 70  | 8.9  | 8.9  | 8.9  | 98  | 12 | 1.16 | 248 | 163 | 48 | 183 | 5.4 | 1 |
| 1 | 41 | 27.7 | 92    | 2 | 1 | 1 | 0 | 0 | 1 | 121 | 83 | 78  | 6.9  | 7    | 6.95 | 90  | 21 | 0.83 | 183 | 99  | 33 | 141 | 5.4 | 1 |
| 2 | 55 | 28.3 | 99    | 2 | 1 | 1 | 1 | 1 | 1 | 128 | 91 | 69  | 8.1  | 7.6  | 7.85 | 147 | 13 | 0.71 | 161 | 185 | 52 | 86  | 7.6 | 0 |
| 2 | 47 | 20.6 | 78    | 1 | 1 | 1 | 0 | 0 | 0 | 97  | 63 | 59  | 6.3  | 6.3  | 6.3  | 79  | 17 | 0.88 | 198 | 56  | 59 | 131 | 5.4 | 0 |
| 2 | 52 | 19.1 | 72.7  | 1 | 1 | 1 | 0 | 0 | 1 | 117 | 77 | 77  | 7.5  | 7.4  | 7.45 | 85  | 15 | 0.62 | 163 | 119 | 39 | 102 | 5.5 | 1 |

|   |    |      |       |   |   |   |   |   |   |     |     |    |      |      |       |     |    |      |     |     |    |     |      |   |
|---|----|------|-------|---|---|---|---|---|---|-----|-----|----|------|------|-------|-----|----|------|-----|-----|----|-----|------|---|
| 2 | 70 | 27.8 | 100.5 | 1 | 1 | 1 | 1 | 1 | 1 | 148 | 82  | 68 | 10.5 | 11   | 10.75 | 209 | 13 | 0.6  | 158 | 151 | 38 | 91  | 11.4 | 1 |
| 2 | 48 | 36.0 | 105.5 | 1 | 1 | 1 | 1 | 0 | 1 | 148 | 89  | 74 | 7    | 7.2  | 7.1   | 107 | 9  | 0.55 | 219 | 108 | 46 | 171 | 5.7  | 1 |
| 1 | 50 | 30.9 | 114   | 2 | 1 | 1 | 1 | 0 | 1 | 137 | 94  | 82 | 9.4  | 8.8  | 9.1   | 106 | 18 | 1.05 | 177 | 125 | 38 | 128 | 5.8  | 1 |
| 1 | 51 | 29.7 | 99.2  | 1 | 2 | 1 | 1 | 0 | 1 | 118 | 84  | 52 | 7    | 7.1  | 7.05  | 109 | 18 | 1.12 | 207 | 266 | 41 | 126 | 5.9  | 1 |
| 2 | 58 | 27.6 | 88.5  | 1 | 1 | 1 | 1 | 0 | 0 | 120 | 69  | 48 | 8.9  | 8.9  | 8.9   | 95  | 25 | 0.65 | 201 | 65  | 61 | 132 | 5.8  | 0 |
| 1 | 46 | 23.2 | 85.5  | 1 | 1 | 1 | 0 | 0 | 0 | 117 | 81  | 60 | 7.4  | 7.4  | 7.4   | 90  | 13 | 0.79 | 189 | 93  | 41 | 143 | 5.3  | 1 |
| 1 | 59 | 25.3 | 86.5  | 1 | 2 | 2 | 0 | 0 | 1 | 130 | 80  | 52 | 7.3  | 7.2  | 7.25  | 106 | 15 | 0.84 | 151 | 88  | 57 | 84  | 5.4  | 0 |
| 1 | 64 | 27.1 | 97.5  | 1 | 1 | 1 | 1 | 0 | 1 | 155 | 106 | 65 | 9.8  | 9.7  | 9.75  | 98  | 14 | 0.99 | 239 | 139 | 43 | 174 | 5.6  | 0 |
| 1 | 51 | 28.3 | 102   | 1 | 1 | 2 | 1 | 0 | 0 | 123 | 74  | 53 | 7.4  | 7.2  | 7.3   | 93  | 16 | 0.85 | 174 | 89  | 57 | 99  | 5.4  | 0 |
| 1 | 58 | 24.5 | 84    | 2 | 1 | 1 | 0 | 0 | 1 | 131 | 87  | 67 | 8.9  | 8.1  | 8.5   | 98  | 10 | 0.84 | 291 | 326 | 52 | 185 | 5.3  | 1 |
| 1 | 66 | 21.1 | 79.5  | 1 | 1 | 1 | 0 | 0 | 0 | 117 | 78  | 61 | 8.5  | 8.4  | 8.45  | 107 | 12 | 0.73 | 209 | 50  | 61 | 140 | 5.5  | 1 |
| 1 | 61 | 36.1 | 121   | 1 | 1 | 1 | 1 | 1 | 0 | 147 | 92  | 75 | 9.2  | 9.2  | 9.2   | 157 | 17 | 0.95 | 214 | 105 | 55 | 134 | 5.9  | 1 |
| 2 | 52 | 22.7 | 84    | 1 | 1 | 1 | 0 | 0 | 1 | 116 | 71  | 70 | 8.3  | 8.1  | 8.2   | 96  | 11 | 0.72 | 280 | 67  | 44 | 233 | 5.7  | 1 |
| 1 | 58 | 25.1 | 87.7  | 1 | 1 | 2 | 0 | 0 | 1 | 123 | 86  | 59 | 6.9  | 6.7  | 6.8   | 92  | 16 | 0.85 | 145 | 79  | 47 | 91  | 5.4  | 1 |
| 1 | 62 | 22.7 | 88    | 2 | 2 | 1 | 1 | 0 | 0 | 148 | 96  | 65 | 8    | 7.7  | 7.85  | 88  | 14 | 1.19 | 216 | 91  | 52 | 148 | 5.5  | 0 |
| 2 | 72 | 24.5 | 86.1  | 1 | 1 | 1 | 1 | 1 | 1 | 156 | 84  | 49 | 9.5  | 9.3  | 9.4   | 115 | 17 | 0.79 | 187 | 229 | 66 | 101 | 6.4  | 1 |
| 1 | 58 | 26.1 | 91    | 1 | 1 | 1 | 1 | 0 | 0 | 107 | 71  | 53 | 8.3  | 7.9  | 8.1   | 105 | 18 | 1.03 | 206 | 101 | 57 | 139 | 5.8  | 0 |
| 2 | 76 | 17.7 | 70.5  | 1 | 1 | 1 | 0 | 0 | 1 | 118 | 61  | 65 | 10.6 | 10.7 | 10.65 | 84  | 14 | 0.79 | 211 | 68  | 70 | 140 | 5.8  | 1 |
| 1 | 77 | 24.7 | 95    | 2 | 1 | 2 | 1 | 0 | 1 | 130 | 71  | 62 | 11.7 | 17.1 | 14.4  | 100 | 16 | 1.01 | 115 | 80  | 56 | 54  | 5.7  | 1 |
| 1 | 33 | 31.8 | 113   | 2 | 1 | 1 | 0 | 0 | 1 | 129 | 81  | 67 | 6.5  | 6.2  | 6.35  | 103 | 12 | 0.87 | 179 | 121 | 35 | 130 | 6.4  | 0 |
| 1 | 47 | 22.5 | 84.8  | 2 | 1 | 1 | 1 | 0 | 0 | 117 | 84  | 61 | 6.7  | 6.7  | 6.7   | 95  | 11 | 1.11 | 182 | 84  | 66 | 100 | 5.6  | 1 |
| 1 | 47 | 27.7 | 94.2  | 1 | 2 | 1 | 1 | 1 | 1 | 134 | 90  | 69 | 7.6  | 7.1  | 7.35  | 161 | 15 | 0.88 | 255 | 237 | 44 | 183 | 11.9 | 1 |
| 1 | 61 | 26.7 | 94    | 2 | 1 | 1 | 1 | 1 | 1 | 125 | 80  | 56 | 8.4  | 8.6  | 8.5   | 173 | 25 | 1.07 | 262 | 246 | 33 | 191 | 8.4  | 1 |
| 1 | 51 | 23.6 | 81    | 1 | 1 | 1 | 0 | 0 | 1 | 119 | 82  | 71 | 7.2  | 7.3  | 7.25  | 98  | 11 | 0.86 | 243 | 150 | 62 | 161 | 5.6  | 1 |
| 1 | 72 | 24.6 | 89    | 1 | 1 | 1 | 1 | 1 | 1 | 132 | 81  | 71 | 10.7 | 10.1 | 10.4  | 193 | 19 | 0.94 | 174 | 101 | 46 | 123 | 7.9  | 0 |
| 2 | 60 | 21.9 | 78.5  | 1 | 1 | 1 | 0 | 0 | 0 | 103 | 67  | 59 | 7.9  | 7.7  | 7.8   | 80  | 15 | 0.66 | 124 | 63  | 86 | 30  | 5.4  | 0 |
| 1 | 64 | 22.6 | 83.5  | 1 | 1 | 1 | 1 | 0 | 0 | 120 | 82  | 70 | 7.8  | 7.8  | 7.8   | 93  | 25 | 0.96 | 201 | 108 | 62 | 130 | 5.3  | 0 |
| 2 | 48 | 20.2 | 75    | 1 | 1 | 1 | 1 | 0 | 1 | 134 | 91  | 75 | 7.1  | 7.1  | 7.1   | 93  | 15 | 0.53 | 222 | 315 | 53 | 126 | 5.2  | 0 |
| 1 | 51 | 25.0 | 90    | 2 | 2 | 1 | 1 | 0 | 1 | 135 | 98  | 61 | 8.2  | 8.2  | 8.2   | 111 | 16 | 0.85 | 182 | 99  | 58 | 112 | 5.9  | 1 |

|   |    |      |      |   |   |   |   |   |   |     |     |    |      |      |       |     |    |      |     |     |    |     |     |   |
|---|----|------|------|---|---|---|---|---|---|-----|-----|----|------|------|-------|-----|----|------|-----|-----|----|-----|-----|---|
| 2 | 63 | 24.0 | 85.7 | 1 | 1 | 1 | 1 | 0 | 1 | 141 | 92  | 77 | 9.3  | 8.5  | 8.9   | 77  | 13 | 0.62 | 224 | 65  | 89 | 126 | 5   | 1 |
| 1 | 47 | 24.8 | 90.1 | 2 | 1 | 1 | 0 | 0 | 1 | 114 | 78  | 80 | 7.4  | 7.4  | 7.4   | 113 | 15 | 0.89 | 188 | 146 | 34 | 144 | 5.6 | 1 |
| 1 | 57 | 29.8 | 99   | 1 | 2 | 1 | 1 | 1 | 1 | 129 | 81  | 84 | 8.1  | 7.8  | 7.95  | 136 | 19 | 0.95 | 167 | 188 | 52 | 100 | 6.6 | 1 |
| 1 | 43 | 24.2 | 88.5 | 1 | 1 | 1 | 1 | 0 | 0 | 138 | 100 | 77 | 7.9  | 7.5  | 7.7   | 98  | 11 | 0.76 | 239 | 161 | 66 | 152 | 5.2 | 0 |
| 2 | 69 | 23.6 | 85.3 | 1 | 1 | 1 | 1 | 1 | 1 | 132 | 75  | 66 | 8.1  | 8.2  | 8.15  | 131 | 13 | 0.49 | 166 | 174 | 52 | 80  | 6.4 | 1 |
| 1 | 53 | 24.7 | 92   | 1 | 1 | 1 | 0 | 0 | 1 | 117 | 84  | 62 | 7.8  | 7.5  | 7.65  | 103 | 18 | 1.19 | 237 | 72  | 54 | 172 | 5.2 | 1 |
| 1 | 59 | 22.2 | 88   | 2 | 2 | 1 | 1 | 0 | 1 | 136 | 95  | 71 | 11.6 | 10.3 | 10.95 | 114 | 17 | 1.13 | 212 | 232 | 49 | 137 | 5.1 | 0 |
| 2 | 64 | 23.3 | 90   | 1 | 1 | 1 | 1 | 0 | 0 | 127 | 80  | 84 | 9.1  | 8.8  | 8.95  | 81  | 21 | 0.89 | 211 | 43  | 65 | 150 | 5.4 | 0 |
| 2 | 61 | 22.5 | 86   | 1 | 1 | 1 | 1 | 0 | 1 | 141 | 93  | 66 | 7.9  | 7.8  | 7.85  | 80  | 14 | 0.65 | 170 | 43  | 73 | 101 | 5   | 1 |
| 1 | 68 | 22.4 | 85   | 1 | 1 | 1 | 1 | 0 | 1 | 120 | 88  | 68 | 7.9  | 8.4  | 8.15  | 99  | 18 | 0.98 | 226 | 61  | 62 | 161 | 5.4 | 0 |
| 2 | 63 | 24.2 | 93.4 | 1 | 1 | 1 | 0 | 0 | 0 | 120 | 82  | 66 | 8.2  | 7.9  | 8.05  | 90  | 17 | 0.61 | 181 | 102 | 49 | 118 | 5.8 | 1 |
| 1 | 43 | 22.6 | 90.5 | 1 | 1 | 1 | 1 | 0 | 0 | 143 | 81  | 74 | 6.8  | 6.6  | 6.7   | 97  | 14 | 0.91 | 222 | 63  | 55 | 159 | 5.1 | 0 |
| 2 | 37 | 23.7 | 89.2 | 1 | 1 | 1 | 0 | 0 | 0 | 119 | 70  | 68 | 7.2  | 7.3  | 7.25  | 95  | 13 | 0.71 | 198 | 103 | 46 | 140 | 5.4 | 0 |
| 2 | 61 | 23.1 | 87   | 1 | 1 | 1 | 0 | 1 | 1 | 120 | 81  | 63 | 9.3  | 9.2  | 9.25  | 124 | 15 | 0.63 | 183 | 192 | 39 | 140 | 6.5 | 0 |
| 1 | 55 | 24.4 | 89.5 | 1 | 2 | 1 | 0 | 0 | 1 | 114 | 71  | 79 | 7.6  | 7.6  | 7.6   | 93  | 14 | 0.98 | 239 | 74  | 62 | 168 | 5.3 | 1 |
| 1 | 44 | 25.9 | 94   | 1 | 1 | 2 | 0 | 0 | 0 | 125 | 83  | 83 | 6.1  | 6.1  | 6.1   | 104 | 19 | 0.84 | 198 | 91  | 49 | 144 | 5.2 | 1 |
| 2 | 46 | 20.5 | 86.7 | 1 | 1 | 1 | 0 | 0 | 0 | 110 | 62  | 53 | 7.4  | 7.3  | 7.35  | 87  | 14 | 0.74 | 204 | 67  | 41 | 153 | 5.4 | 1 |
| 1 | 45 | 27.7 | 97   | 2 | 1 | 1 | 0 | 0 | 0 | 132 | 81  | 60 | 6.8  | 6.7  | 6.75  | 104 | 13 | 0.95 | 199 | 106 | 44 | 142 | 5.7 | 1 |
| 2 | 55 | 22.6 | 84.5 | 1 | 1 | 2 | 1 | 0 | 1 | 148 | 97  | 84 | 9.8  | 9.3  | 9.55  | 98  | 9  | 0.79 | 281 | 96  | 71 | 201 | 5.6 | 1 |
| 1 | 52 | 20.1 | 76.8 | 1 | 1 | 2 | 0 | 0 | 1 | 122 | 73  | 56 | 7.1  | 7.1  | 7.1   | 95  | 14 | 0.92 | 240 | 94  | 60 | 164 | 5.4 | 1 |
| 2 | 66 | 25.5 | 95   | 1 | 1 | 1 | 0 | 0 | 1 | 126 | 82  | 56 | 8.9  | 8.7  | 8.8   | 96  | 16 | 0.66 | 238 | 94  | 69 | 167 | 5.4 | 0 |
| 1 | 43 | 24.6 | 89.1 | 2 | 1 | 1 | 1 | 0 | 0 | 128 | 91  | 74 | 7.7  | 7.3  | 7.5   | 111 | 11 | 0.84 | 205 | 108 | 47 | 148 | 5.8 | 0 |
| 2 | 68 | 21.2 | 74   | 1 | 1 | 1 | 1 | 1 | 1 | 129 | 74  | 68 | 7.8  | 7.7  | 7.75  | 131 | 22 | 0.84 | 132 | 65  | 68 | 63  | 7   | 1 |
| 1 | 44 | 23.7 | 87.6 | 2 | 2 | 1 | 0 | 0 | 0 | 115 | 73  | 51 | 5.9  | 5.8  | 5.85  | 89  | 14 | 1.03 | 164 | 158 | 47 | 101 | 5   | 1 |
| 1 | 70 | 21.8 | 80.2 | 1 | 1 | 1 | 0 | 0 | 0 | 107 | 72  | 52 | 9    | 9.2  | 9.1   | 106 | 20 | 1.16 | 206 | 99  | 48 | 152 | 5.4 | 1 |
| 1 | 50 | 27.0 | 92   | 1 | 2 | 2 | 0 | 0 | 1 | 108 | 64  | 64 | 6.5  | 6.7  | 6.6   | 101 | 15 | 0.94 | 201 | 111 | 41 | 146 | 5.3 | 1 |
| 1 | 59 | 22.2 | 82.6 | 2 | 1 | 1 | 0 | 0 | 0 | 130 | 89  | 73 | 8.3  | 8.4  | 8.35  | 86  | 15 | 0.89 | 221 | 123 | 44 | 154 | 5.4 | 1 |
| 2 | 57 | 22.1 | 83.5 | 1 | 1 | 2 | 0 | 0 | 0 | 121 | 76  | 50 | 7.5  | 7.1  | 7.3   | 93  | 13 | 0.61 | 212 | 82  | 45 | 154 | 5.4 | 0 |
| 1 | 65 | 27.2 | 95   | 1 | 1 | 1 | 1 | 0 | 0 | 129 | 84  | 70 | 8.3  | 8.6  | 8.45  | 112 | 20 | 0.93 | 198 | 109 | 40 | 148 | 5.6 | 0 |

|   |    |      |       |   |   |   |   |   |   |     |     |    |      |      |       |     |    |      |     |     |    |     |      |   |
|---|----|------|-------|---|---|---|---|---|---|-----|-----|----|------|------|-------|-----|----|------|-----|-----|----|-----|------|---|
| 2 | 47 | 21.9 | 80    | 1 | 1 | 1 | 0 | 0 | 0 | 117 | 79  | 83 | 7.7  | 7.1  | 7.4   | 93  | 7  | 0.64 | 208 | 87  | 82 | 118 | 5.1  | 1 |
| 2 | 56 | 24.2 | 84    | 1 | 1 | 1 | 1 | 1 | 1 | 135 | 85  | 95 | 8.1  | 8.3  | 8.2   | 117 | 13 | 0.6  | 138 | 76  | 58 | 80  | 6.6  | 0 |
| 1 | 50 | 26.3 | 88.6  | 2 | 1 | 1 | 0 | 0 | 0 | 109 | 71  | 51 | 7.2  | 7.1  | 7.15  | 94  | 14 | 0.99 | 187 | 95  | 72 | 112 | 5.1  | 1 |
| 1 | 45 | 21.5 | 75.1  | 2 | 1 | 1 | 1 | 0 | 1 | 131 | 92  | 75 | 6.9  | 7.2  | 7.05  | 84  | 11 | 0.87 | 224 | 170 | 45 | 162 | 5.3  | 1 |
| 1 | 52 | 23.0 | 90.8  | 1 | 2 | 1 | 0 | 0 | 1 | 120 | 75  | 60 | 7    | 6.9  | 6.95  | 107 | 22 | 1.07 | 179 | 89  | 66 | 113 | 5.5  | 1 |
| 2 | 43 | 20.8 | 78    | 1 | 1 | 1 | 0 | 0 | 0 | 117 | 78  | 66 | 7.5  | 7.4  | 7.45  | 97  | 10 | 0.81 | 183 | 82  | 48 | 121 | 5.4  | 0 |
| 1 | 48 | 28.4 | 102.2 | 2 | 1 | 1 | 0 | 1 | 1 | 120 | 80  | 65 | 7.4  | 7.3  | 7.35  | 152 | 11 | 0.74 | 139 | 186 | 34 | 84  | 5.8  | 1 |
| 2 | 56 | 23.4 | 82    | 1 | 1 | 1 | 1 | 0 | 0 | 153 | 108 | 63 | 8.5  | 8.3  | 8.4   | 89  | 20 | 0.69 | 207 | 103 | 87 | 112 | 5.6  | 0 |
| 1 | 53 | 28.3 | 93    | 1 | 2 | 2 | 1 | 0 | 1 | 129 | 92  | 76 | 7.8  | 7.5  | 7.65  | 101 | 18 | 0.75 | 230 | 78  | 79 | 152 | 5.6  | 1 |
| 1 | 36 | 21.0 | 87.5  | 2 | 1 | 1 | 0 | 0 | 0 | 124 | 80  | 76 | 6.6  | 6.7  | 6.65  | 101 | 14 | 0.79 | 154 | 117 | 54 | 88  | 5.1  | 1 |
| 1 | 57 | 23.1 | 86.8  | 1 | 2 | 2 | 0 | 0 | 0 | 121 | 86  | 73 | 7.7  | 7.8  | 7.75  | 104 | 15 | 0.84 | 173 | 103 | 54 | 115 | 5.4  | 1 |
| 2 | 45 | 21.4 | 76    | 1 | 1 | 1 | 0 | 0 | 0 | 120 | 71  | 88 | 7.6  | 7.4  | 7.5   | 92  | 13 | 0.66 | 154 | 100 | 52 | 94  | 5    | 0 |
| 1 | 44 | 30.3 | 99    | 1 | 1 | 1 | 0 | 0 | 0 | 123 | 79  | 78 | 6.9  | 6.7  | 6.8   | 91  | 10 | 0.83 | 185 | 117 | 47 | 129 | 5.6  | 1 |
| 2 | 54 | 24.5 | 82    | 1 | 1 | 1 | 0 | 0 | 1 | 121 | 80  | 70 | 8    | 8    | 8     | 102 | 17 | 0.79 | 237 | 71  | 66 | 162 | 4.8  | 1 |
| 1 | 52 | 24.1 | 80    | 2 | 2 | 1 | 0 | 0 | 1 | 126 | 88  | 67 | 8.2  | 8    | 8.1   | 98  | 11 | 0.85 | 213 | 201 | 49 | 141 | 5.3  | 1 |
| 2 | 50 | 21.4 | 82.2  | 1 | 1 | 1 | 0 | 0 | 0 | 126 | 83  | 60 | 7.7  | 7.7  | 7.7   | 82  | 14 | 0.75 | 208 | 57  | 62 | 138 | 5.3  | 1 |
| 1 | 52 | 23.4 | 86    | 2 | 2 | 1 | 0 | 0 | 1 | 117 | 89  | 67 | 8.2  | 8    | 8.1   | 110 | 14 | 0.8  | 182 | 243 | 39 | 116 | 5.2  | 0 |
| 1 | 49 | 24.7 | 91    | 1 | 1 | 1 | 1 | 0 | 1 | 131 | 95  | 58 | 8.8  | 8.4  | 8.6   | 88  | 13 | 0.99 | 196 | 277 | 34 | 124 | 5.3  | 1 |
| 1 | 33 | 24.8 | 87    | 2 | 1 | 1 | 0 | 0 | 0 | 127 | 77  | 58 | 6.1  | 6.1  | 6.1   | 84  | 17 | 0.9  | 176 | 112 | 48 | 113 | 4.9  | 0 |
| 1 | 51 | 25.3 | 88    | 2 | 1 | 1 | 0 | 0 | 0 | 110 | 78  | 72 | 7.2  | 7.3  | 7.25  | 82  | 11 | 1.06 | 158 | 40  | 41 | 116 | 6.1  | 1 |
| 1 | 50 | 36.7 | 120   | 1 | 1 | 1 | 1 | 1 | 1 | 160 | 110 | 76 | 7.8  | 7.7  | 7.75  | 111 | 10 | 0.7  | 142 | 90  | 34 | 104 | 7.5  | 1 |
| 2 | 66 | 33.9 | 112.7 | 2 | 1 | 1 | 1 | 1 | 1 | 134 | 70  | 65 | 8    | 7.7  | 7.85  | 85  | 24 | 0.45 | 163 | 233 | 43 | 96  | 5.7  | 0 |
| 1 | 67 | 24.2 | 103   | 1 | 1 | 1 | 1 | 1 | 1 | 127 | 86  | 66 | 10.3 | 10.5 | 10.4  | 138 | 16 | 0.95 | 242 | 411 | 36 | 144 | 9.9  | 1 |
| 1 | 63 | 25.6 | 96.1  | 1 | 1 | 1 | 1 | 1 | 1 | 166 | 99  | 75 | 10   | 10   | 10    | 115 | 12 | 0.66 | 161 | 121 | 36 | 118 | 11.1 | 1 |
| 1 | 72 | 23.2 | 89    | 2 | 2 | 1 | 0 | 0 | 0 | 124 | 77  | 77 | 10.8 | 10.5 | 10.65 | 73  | 15 | 1.01 | 191 | 75  | 66 | 119 | 5.1  | 0 |
| 2 | 46 | 23.3 | 83.7  | 2 | 2 | 1 | 0 | 0 | 0 | 106 | 72  | 60 | 8.9  | 8.6  | 8.75  | 103 | 15 | 0.76 | 152 | 108 | 43 | 102 | 5.4  | 0 |
| 1 | 48 | 27.4 | 98    | 2 | 2 | 2 | 1 | 0 | 1 | 132 | 96  | 56 | 9.7  | 9.6  | 9.65  | 102 | 25 | 1.02 | 196 | 250 | 36 | 129 | 5.7  | 0 |
| 2 | 24 | 18.3 | 66.1  | 1 | 1 | 1 | 0 | 0 | 0 | 105 | 81  | 65 | 6.5  | 7    | 6.75  | 82  | 11 | 0.7  | 141 | 59  | 66 | 76  | 4.8  | 0 |
| 1 | 48 | 25.4 | 84    | 2 | 1 | 1 | 1 | 0 | 1 | 135 | 92  | 89 | 6.1  | 6.1  | 6.1   | 125 | 14 | 0.94 | 231 | 61  | 65 | 164 | 5.4  | 1 |

|   |    |      |       |   |   |   |   |   |   |     |    |    |      |      |      |     |    |      |     |     |    |     |     |   |
|---|----|------|-------|---|---|---|---|---|---|-----|----|----|------|------|------|-----|----|------|-----|-----|----|-----|-----|---|
| 1 | 45 | 35.1 | 107.8 | 1 | 1 | 1 | 1 | 0 | 1 | 138 | 99 | 78 | 6.5  | 5.9  | 6.2  | 92  | 21 | 1.19 | 213 | 134 | 32 | 169 | 5.5 | 1 |
| 2 | 54 | 26.3 | 84.6  | 1 | 1 | 1 | 0 | 0 | 0 | 126 | 69 | 72 | 6.9  | 6.9  | 6.9  | 94  | 10 | 0.61 | 204 | 89  | 65 | 132 | 5.3 | 1 |
| 2 | 36 | 22.1 | 76.5  | 1 | 1 | 1 | 0 | 0 | 0 | 119 | 77 | 65 | 6.2  | 6.1  | 6.15 | 82  | 11 | 0.56 | 175 | 102 | 61 | 106 | 4.9 | 1 |
| 1 | 40 | 22.1 | 85.7  | 1 | 1 | 1 | 0 | 0 | 0 | 125 | 86 | 68 | 6.4  | 6.6  | 6.5  | 102 | 11 | 0.84 | 169 | 90  | 64 | 98  | 5.1 | 0 |
| 2 | 43 | 24.8 | 87    | 1 | 1 | 1 | 0 | 0 | 0 | 110 | 77 | 71 | 7.3  | 7.3  | 7.3  | 91  | 14 | 0.54 | 195 | 46  | 82 | 112 | 5.4 | 0 |
| 2 | 58 | 22.7 | 80    | 1 | 1 | 1 | 1 | 0 | 1 | 146 | 92 | 47 | 7.1  | 7    | 7.05 | 86  | 12 | 0.59 | 220 | 96  | 42 | 172 | 5.4 | 1 |
| 1 | 66 | 26.0 | 95    | 1 | 1 | 1 | 1 | 1 | 1 | 131 | 79 | 62 | 7.4  | 7.7  | 7.55 | 136 | 17 | 0.78 | 204 | 98  | 82 | 117 | 6.7 | 1 |
| 1 | 41 | 29.1 | 101   | 2 | 2 | 1 | 0 | 0 | 1 | 126 | 87 | 76 | 6.7  | 6.7  | 6.7  | 114 | 13 | 1.01 | 230 | 358 | 52 | 135 | 5.9 | 0 |
| 1 | 61 | 28.4 | 102.1 | 1 | 1 | 1 | 0 | 0 | 0 | 131 | 81 | 56 | 8    | 7.9  | 7.95 | 100 | 12 | 0.89 | 194 | 159 | 47 | 133 | 5.8 | 0 |
| 1 | 36 | 23.7 | 88.7  | 1 | 1 | 1 | 0 | 0 | 1 | 118 | 71 | 61 | 7.6  | 7.3  | 7.45 | 90  | 15 | 1.03 | 242 | 163 | 42 | 182 | 5.4 | 1 |
| 1 | 36 | 28.0 | 105.7 | 1 | 1 | 1 | 0 | 0 | 1 | 118 | 70 | 79 | 7.9  | 8.1  | 8    | 100 | 16 | 0.89 | 139 | 144 | 24 | 103 | 5.1 | 1 |
| 2 | 74 | 22.2 | 83.7  | 1 | 1 | 2 | 0 | 0 | 0 | 132 | 76 | 57 | 8.9  | 8.8  | 8.85 | 94  | 30 | 0.66 | 193 | 40  | 55 | 140 | 5.7 | 1 |
| 1 | 39 | 22.3 | 77.5  | 2 | 1 | 2 | 0 | 0 | 0 | 120 | 69 | 45 | 7.9  | 7.7  | 7.8  | 86  | 13 | 1.14 | 175 | 131 | 44 | 115 | 5.2 | 1 |
| 1 | 55 | 25.1 | 92.8  | 1 | 1 | 1 | 0 | 0 | 0 | 124 | 76 | 65 | 7.1  | 7.1  | 7.1  | 93  | 15 | 1.03 | 183 | 88  | 56 | 122 | 5.4 | 1 |
| 1 | 76 | 21.9 | 87    | 1 | 1 | 1 | 1 | 0 | 1 | 123 | 74 | 50 | 9.8  | 9.9  | 9.85 | 104 | 24 | 1.14 | 162 | 86  | 46 | 114 | 5.3 | 0 |
| 1 | 45 | 23.8 | 77.7  | 2 | 1 | 1 | 0 | 0 | 0 | 118 | 87 | 53 | 8.4  | 8.7  | 8.55 | 93  | 16 | 0.79 | 173 | 81  | 54 | 108 | 5   | 0 |
| 1 | 38 | 29.2 | 100.5 | 2 | 1 | 1 | 0 | 0 | 0 | 127 | 80 | 69 | 6.5  | 6.2  | 6.35 | 102 | 13 | 0.78 | 220 | 176 | 56 | 148 | 5.6 | 1 |
| 1 | 41 | 24.6 | 84.5  | 2 | 1 | 1 | 0 | 0 | 1 | 115 | 75 | 70 | 7.1  | 7    | 7.05 | 97  | 14 | 0.77 | 248 | 137 | 43 | 175 | 5.7 | 1 |
| 2 | 56 | 22.4 | 83.8  | 1 | 1 | 1 | 0 | 1 | 1 | 121 | 64 | 61 | 7.3  | 7.2  | 7.25 | 142 | 13 | 0.67 | 222 | 115 | 55 | 147 | 7   | 1 |
| 1 | 40 | 22.6 | 73.7  | 1 | 1 | 1 | 0 | 0 | 0 | 108 | 75 | 76 | 7.2  | 7.2  | 7.2  | 94  | 10 | 0.92 | 188 | 61  | 68 | 116 | 5.2 | 0 |
| 1 | 51 | 25.5 | 91    | 1 | 1 | 1 | 0 | 0 | 0 | 119 | 82 | 59 | 6.7  | 6.8  | 6.75 | 87  | 12 | 0.81 | 188 | 86  | 58 | 120 | 5.2 | 1 |
| 1 | 52 | 25.2 | 88.5  | 1 | 1 | 1 | 0 | 0 | 0 | 107 | 76 | 69 | 7.3  | 7.6  | 7.45 | 97  | 10 | 0.79 | 195 | 145 | 65 | 112 | 5.3 | 0 |
| 1 | 49 | 22.3 | 84.1  | 1 | 2 | 1 | 0 | 0 | 0 | 122 | 83 | 66 | 7.8  | 7.6  | 7.7  | 91  | 13 | 1    | 233 | 84  | 69 | 152 | 5.1 | 0 |
| 1 | 38 | 22.5 | 84    | 1 | 1 | 1 | 0 | 0 | 0 | 115 | 72 | 61 | 7.8  | 7.6  | 7.7  | 90  | 11 | 0.84 | 182 | 118 | 45 | 128 | 5.3 | 0 |
| 1 | 38 | 30.9 | 118.7 | 2 | 1 | 1 | 0 | 0 | 0 | 124 | 76 | 66 | 5.7  | 5.7  | 5.7  | 103 | 11 | 0.82 | 204 | 77  | 51 | 141 | 5.4 | 0 |
| 1 | 30 | 26.5 | 93    | 2 | 1 | 1 | 1 | 0 | 0 | 137 | 94 | 58 | 7.6  | 7.5  | 7.55 | 99  | 14 | 0.9  | 230 | 186 | 73 | 135 | 5   | 0 |
| 2 | 49 | 26.4 | 89    | 1 | 1 | 1 | 1 | 0 | 1 | 135 | 91 | 69 | 6.6  | 6.5  | 6.55 | 121 | 15 | 0.55 | 217 | 119 | 43 | 164 | 5.8 | 1 |
| 2 | 75 | 19.9 | 89    | 1 | 1 | 1 | 1 | 1 | 1 | 134 | 82 | 78 | 12.7 | 11.9 | 12.3 | 109 | 15 | 0.55 | 160 | 122 | 98 | 60  | 7.2 | 1 |
| 2 | 51 | 20.0 | 72    | 1 | 1 | 2 | 1 | 0 | 0 | 121 | 83 | 56 | 7    | 7    | 7    | 94  | 13 | 0.73 | 192 | 37  | 70 | 123 | 5.1 | 0 |

|   |    |      |       |   |   |   |   |   |   |     |     |    |      |      |       |     |    |      |     |     |     |     |      |   |
|---|----|------|-------|---|---|---|---|---|---|-----|-----|----|------|------|-------|-----|----|------|-----|-----|-----|-----|------|---|
| 1 | 63 | 25.3 | 93    | 1 | 1 | 1 | 1 | 1 | 0 | 131 | 78  | 47 | 9.4  | 8.8  | 9.1   | 117 | 19 | 0.99 | 202 | 111 | 46  | 127 | 6.5  | 1 |
| 1 | 68 | 22.4 | 75.5  | 1 | 2 | 2 | 0 | 1 | 0 | 139 | 84  | 57 | 8.2  | 8    | 8.1   | 130 | 18 | 0.79 | 236 | 91  | 73  | 159 | 6.4  | 1 |
| 2 | 48 | 38.6 | 109   | 2 | 1 | 1 | 1 | 0 | 0 | 150 | 90  | 68 | 5.5  | 5.9  | 5.7   | 93  | 13 | 0.84 | 239 | 133 | 50  | 151 | 5.7  | 1 |
| 1 | 57 | 36.0 | 123   | 1 | 1 | 1 | 1 | 1 | 1 | 130 | 88  | 58 | 9.2  | 8.7  | 8.95  | 161 | 16 | 0.95 | 225 | 246 | 45  | 134 | 8.9  | 1 |
| 1 | 81 | 26.9 | 96    | 2 | 2 | 1 | 0 | 0 | 1 | 133 | 83  | 49 | 9.4  | 9.6  | 9.5   | 113 | 20 | 1.07 | 134 | 80  | 71  | 58  | 6.1  | 1 |
| 1 | 77 | 23.6 | 85    | 1 | 1 | 1 | 1 | 1 | 1 | 147 | 83  | 90 | 11.6 | 11.8 | 11.7  | 232 | 28 | 1.01 | 157 | 69  | 68  | 76  | 9.4  | 0 |
| 1 | 54 | 25.5 | 93    | 2 | 2 | 1 | 1 | 0 | 0 | 137 | 94  | 71 | 8.6  | 8.5  | 8.55  | 98  | 14 | 1.01 | 163 | 104 | 56  | 78  | 5.4  | 0 |
| 1 | 62 | 26.3 | 101   | 2 | 2 | 2 | 0 | 0 | 1 | 123 | 71  | 46 | 7.7  | 7.8  | 7.75  | 89  | 12 | 0.97 | 266 | 169 | 56  | 169 | 5.6  | 0 |
| 2 | 56 | 22.9 | 85    | 1 | 2 | 1 | 0 | 0 | 1 | 111 | 65  | 51 | 6.7  | 6.7  | 6.7   | 101 | 9  | 0.63 | 333 | 42  | 108 | 200 | 5.4  | 1 |
| 1 | 53 | 25.3 | 92    | 1 | 2 | 1 | 0 | 0 | 0 | 122 | 80  | 66 | 7.4  | 7.3  | 7.35  | 104 | 18 | 0.83 | 202 | 173 | 48  | 122 | 5.5  | 0 |
| 2 | 42 | 21.2 | 76.8  | 1 | 1 | 1 | 0 | 0 | 1 | 110 | 73  | 68 | 6.9  | 6.8  | 6.85  | 111 | 11 | 0.91 | 240 | 121 | 45  | 160 | 5.9  | 1 |
| 1 | 58 | 24.7 | 89.5  | 2 | 1 | 1 | 1 | 0 | 0 | 128 | 83  | 66 | 8.1  | 8.2  | 8.15  | 109 | 8  | 0.89 | 212 | 187 | 53  | 122 | 6.1  | 1 |
| 2 | 40 | 29.2 | 91.5  | 1 | 1 | 2 | 0 | 0 | 0 | 136 | 84  | 62 | 6.7  | 6.7  | 6.7   | 96  | 13 | 0.72 | 231 | 119 | 52  | 152 | 5.9  | 0 |
| 2 | 52 | 31.6 | 108   | 2 | 2 | 1 | 0 | 0 | 0 | 108 | 77  | 69 | 7.8  | 8.2  | 8     | 98  | 14 | 0.64 | 187 | 79  | 57  | 116 | 6.1  | 1 |
| 1 | 59 | 26.0 | 100.5 | 2 | 1 | 1 | 1 | 0 | 0 | 151 | 89  | 61 | 9.3  | 9    | 9.15  | 97  | 22 | 1.08 | 227 | 90  | 75  | 132 | 5.7  | 1 |
| 2 | 54 | 25.5 | 87.5  | 2 | 1 | 1 | 0 | 1 | 0 | 123 | 79  | 88 | 8.3  | 8.2  | 8.25  | 257 | 20 | 0.71 | 227 | 94  | 56  | 149 | 11.2 | 1 |
| 1 | 53 | 27.8 | 80    | 2 | 1 | 1 | 1 | 0 | 1 | 139 | 87  | 67 | 8.2  | 8.1  | 8.15  | 103 | 15 | 1.07 | 232 | 206 | 41  | 144 | 6.1  | 1 |
| 2 | 65 | 24.2 | 90    | 1 | 1 | 1 | 1 | 1 | 1 | 148 | 89  | 73 | 9    | 8.6  | 8.8   | 167 | 17 | 0.68 | 277 | 138 | 67  | 173 | 7.6  | 0 |
| 1 | 54 | 23.2 | 79.5  | 2 | 1 | 1 | 1 | 1 | 1 | 146 | 94  | 52 | 8.5  | 8.3  | 8.4   | 112 | 13 | 0.93 | 178 | 171 | 42  | 107 | 6    | 1 |
| 1 | 41 | 34.5 | 112   | 2 | 1 | 1 | 0 | 0 | 1 | 108 | 77  | 71 | 7.7  | 7.3  | 7.5   | 89  | 13 | 0.83 | 163 | 88  | 36  | 112 | 6.1  | 0 |
| 1 | 55 | 26.1 | 89    | 2 | 2 | 1 | 1 | 1 | 0 | 143 | 103 | 78 | 9.5  | 9.2  | 9.35  | 141 | 11 | 0.81 | 200 | 63  | 73  | 125 | 7.4  | 1 |
| 2 | 49 | 26.1 | 87    | 1 | 1 | 1 | 0 | 0 | 0 | 107 | 73  | 60 | 7.9  | 8.1  | 8     | 107 | 22 | 0.6  | 186 | 45  | 71  | 100 | 5.6  | 1 |
| 1 | 44 | 24.1 | 89    | 1 | 1 | 1 | 0 | 0 | 1 | 128 | 85  | 72 | 7.9  | 7.8  | 7.85  | 94  | 19 | 0.89 | 162 | 212 | 33  | 98  | 5.7  | 0 |
| 1 | 50 | 29.2 | 108.5 | 1 | 1 | 1 | 1 | 1 | 1 | 136 | 93  | 55 | 8.3  | 8.4  | 8.35  | 155 | 16 | 0.82 | 158 | 173 | 39  | 92  | 7.3  | 1 |
| 2 | 57 | 17.6 | 66.3  | 1 | 1 | 1 | 0 | 0 | 0 | 128 | 85  | 66 | 7.7  | 7.7  | 7.7   | 91  | 14 | 0.69 | 229 | 56  | 103 | 120 | 5.7  | 0 |
| 1 | 40 | 30.4 | 101.5 | 1 | 1 | 1 | 1 | 0 | 1 | 140 | 76  | 67 | 6    | 6    | 6     | 114 | 16 | 1.22 | 234 | 217 | 50  | 147 | 5.6  | 1 |
| 2 | 41 | 22.4 | 81.5  | 1 | 1 | 1 | 1 | 0 | 0 | 142 | 92  | 57 | 6.5  | 6.7  | 6.6   | 92  | 13 | 0.81 | 184 | 38  | 81  | 94  | 5.3  | 0 |
| 1 | 70 | 24.5 | 93    | 2 | 1 | 1 | 0 | 1 | 1 | 106 | 89  | 66 | 10   | 10.1 | 10.05 | 111 | 16 | 1.03 | 176 | 117 | 53  | 107 | 6.4  | 0 |
| 1 | 53 | 25.9 | 93.6  | 1 | 1 | 1 | 1 | 1 | 1 | 104 | 68  | 64 | 6.8  | 6.9  | 6.85  | 104 | 28 | 1.49 | 138 | 87  | 42  | 83  | 6.5  | 1 |

|   |    |      |       |   |   |   |   |   |   |     |     |    |      |      |       |     |    |      |     |     |     |     |      |   |
|---|----|------|-------|---|---|---|---|---|---|-----|-----|----|------|------|-------|-----|----|------|-----|-----|-----|-----|------|---|
| 1 | 68 | 26.4 | 90    | 2 | 1 | 1 | 1 | 0 | 0 | 146 | 78  | 60 | 9.4  | 9.1  | 9.25  | 112 | 12 | 0.85 | 193 | 60  | 50  | 129 | 5.7  | 1 |
| 2 | 64 | 28.4 | 95.5  | 1 | 1 | 1 | 1 | 1 | 1 | 133 | 83  | 70 | 9.4  | 9.3  | 9.35  | 124 | 15 | 0.59 | 164 | 82  | 61  | 88  | 7.5  | 1 |
| 1 | 51 | 27.7 | 95.3  | 2 | 1 | 2 | 1 | 0 | 0 | 127 | 89  | 54 | 8.6  | 7.9  | 8.25  | 100 | 26 | 1.15 | 183 | 145 | 48  | 106 | 5.4  | 0 |
| 1 | 41 | 30.7 | 100.5 | 2 | 2 | 1 | 1 | 0 | 1 | 152 | 103 | 93 | 8.1  | 10.5 | 9.3   | 114 | 15 | 1.01 | 293 | 367 | 43  | 169 | 6.1  | 0 |
| 1 | 61 | 23.3 | 84    | 1 | 1 | 1 | 0 | 0 | 0 | 120 | 83  | 59 | 6.9  | 7.3  | 7.1   | 100 | 14 | 0.84 | 168 | 111 | 50  | 90  | 5.4  | 0 |
| 1 | 39 | 23.9 | 92.5  | 2 | 2 | 1 | 0 | 0 | 0 | 120 | 75  | 54 | 7.7  | 7.7  | 7.7   | 88  | 17 | 1.03 | 218 | 92  | 70  | 127 | 5.4  | 0 |
| 1 | 72 | 25.5 | 91.5  | 1 | 1 | 1 | 1 | 1 | 0 | 138 | 89  | 55 | 11.2 | 11.4 | 11.3  | 141 | 18 | 0.77 | 208 | 94  | 51  | 138 | 8.1  | 0 |
| 2 | 61 | 19.9 | 77    | 1 | 1 | 1 | 0 | 0 | 1 | 119 | 75  | 70 | 7.8  | 7.7  | 7.75  | 94  | 12 | 0.62 | 292 | 82  | 59  | 209 | 6    | 0 |
| 2 | 54 | 23.3 | 84.5  | 1 | 1 | 1 | 0 | 0 | 0 | 123 | 87  | 78 | 8.4  | 8.3  | 8.35  | 103 | 16 | 0.66 | 233 | 73  | 58  | 136 | 5.5  | 1 |
| 1 | 49 | 25.4 | 94    | 1 | 1 | 1 | 1 | 0 | 0 | 121 | 84  | 67 | 8    | 7.6  | 7.8   | 105 | 16 | 0.99 | 198 | 67  | 51  | 136 | 5.4  | 1 |
| 2 | 40 | 21.8 | 77    | 1 | 2 | 1 | 0 | 0 | 0 | 110 | 72  | 65 | 6.7  | 6.6  | 6.65  | 76  | 14 | 0.94 | 175 | 77  | 65  | 94  | 5.3  | 1 |
| 1 | 45 | 24.8 | 90.5  | 1 | 1 | 1 | 0 | 0 | 1 | 119 | 83  | 78 | 6.1  | 6    | 6.05  | 50  | 17 | 1.08 | 262 | 62  | 68  | 177 | 5.2  | 1 |
| 1 | 58 | 27.6 | 93.5  | 1 | 1 | 1 | 0 | 0 | 1 | 125 | 87  | 74 | 7.6  | 7.5  | 7.55  | 88  | 10 | 0.75 | 163 | 160 | 34  | 96  | 5.4  | 0 |
| 1 | 55 | 25.0 | 91    | 2 | 2 | 1 | 1 | 1 | 1 | 142 | 96  | 59 | 9.7  | 9.7  | 9.7   | 127 | 13 | 0.77 | 134 | 275 | 43  | 60  | 5.8  | 0 |
| 2 | 58 | 21.8 | 77.5  | 1 | 1 | 1 | 0 | 0 | 0 | 112 | 66  | 61 | 7.2  | 7.2  | 7.2   | 88  | 10 | 0.71 | 161 | 152 | 43  | 88  | 5.6  | 0 |
| 1 | 44 | 23.7 | 81    | 1 | 1 | 2 | 0 | 0 | 0 | 114 | 71  | 63 | 6.7  | 6.8  | 6.75  | 114 | 17 | 1.03 | 197 | 60  | 52  | 129 | 5.8  | 1 |
| 1 | 49 | 23.1 | 83    | 2 | 2 | 1 | 0 | 0 | 0 | 113 | 61  | 53 | 7.1  | 6.9  | 7     | 100 | 12 | 0.93 | 191 | 75  | 62  | 121 | 5.7  | 1 |
| 1 | 55 | 24.0 | 84    | 2 | 2 | 1 | 1 | 0 | 1 | 137 | 103 | 78 | 9    | 10.6 | 9.8   | 88  | 11 | 1.02 | 208 | 212 | 40  | 131 | 5.5  | 0 |
| 1 | 65 | 28.1 | 102.5 | 2 | 2 | 2 | 1 | 1 | 1 | 128 | 79  | 74 | 8.9  | 8.6  | 8.75  | 140 | 11 | 0.93 | 167 | 122 | 81  | 72  | 6.6  | 0 |
| 2 | 62 | 15.8 | 65    | 1 | 1 | 1 | 0 | 0 | 1 | 112 | 75  | 48 | 9.2  | 9.2  | 9.2   | 98  | 17 | 0.61 | 258 | 65  | 111 | 138 | 5.3  | 0 |
| 2 | 48 | 27.7 | 109   | 1 | 1 | 1 | 0 | 0 | 0 | 127 | 87  | 70 | 7    | 6.9  | 6.95  | 93  | 13 | 0.71 | 155 | 54  | 47  | 98  | 6    | 1 |
| 2 | 70 | 29.2 | 74    | 1 | 1 | 1 | 1 | 1 | 1 | 150 | 90  | 76 | 11.4 | 11.5 | 11.45 | 208 | 6  | 0.47 | 130 | 78  | 34  | 78  | 10.8 | 1 |
| 2 | 24 | 27.9 | 96    | 1 | 1 | 1 | 0 | 0 | 0 | 126 | 75  | 67 | 5.5  | 5.4  | 5.45  | 99  | 7  | 0.51 | 145 | 64  | 51  | 81  | 5.5  | 1 |
| 1 | 56 | 25.0 | 90.5  | 1 | 2 | 1 | 0 | 0 | 1 | 126 | 88  | 60 | 8.1  | 7.3  | 7.7   | 92  | 15 | 0.88 | 248 | 328 | 39  | 141 | 5.4  | 1 |
| 1 | 64 | 20.3 | 72    | 2 | 2 | 1 | 1 | 1 | 0 | 143 | 81  | 66 | 8    | 7.9  | 7.95  | 118 | 9  | 0.76 | 169 | 63  | 102 | 65  | 5.9  | 1 |
| 2 | 63 | 25.9 | 89    | 1 | 1 | 1 | 1 | 1 | 1 | 141 | 98  | 68 | 9.2  | 8.8  | 9     | 140 | 27 | 0.68 | 262 | 133 | 52  | 173 | 7.1  | 1 |
| 1 | 39 | 25.7 | 89.5  | 1 | 1 | 1 | 0 | 0 | 0 | 122 | 73  | 46 | 7.6  | 7.6  | 7.6   | 89  | 22 | 1.03 | 198 | 71  | 66  | 127 | 5.4  | 0 |
| 1 | 65 | 24.8 | 93    | 2 | 2 | 1 | 1 | 0 | 1 | 129 | 91  | 64 | 8.7  | 9.7  | 9.2   | 96  | 14 | 0.69 | 150 | 87  | 55  | 87  | 5.7  | 0 |
| 1 | 54 | 28.1 | 97    | 1 | 2 | 1 | 1 | 0 | 0 | 145 | 109 | 68 | 7.8  | 7.1  | 7.45  | 94  | 11 | 0.88 | 158 | 89  | 58  | 78  | 5.7  | 1 |

|   |    |      |      |   |   |   |   |   |   |     |     |    |      |     |       |     |    |      |     |     |    |     |     |   |
|---|----|------|------|---|---|---|---|---|---|-----|-----|----|------|-----|-------|-----|----|------|-----|-----|----|-----|-----|---|
| 1 | 54 | 23.5 | 85   | 2 | 1 | 1 | 1 | 0 | 1 | 142 | 92  | 70 | 10   | 9.4 | 9.7   | 102 | 15 | 0.91 | 196 | 202 | 59 | 110 | 5.7 | 1 |
| 1 | 51 | 24.5 | 93.5 | 2 | 1 | 1 | 1 | 0 | 0 | 135 | 94  | 74 | 7.1  | 7.1 | 7.1   | 107 | 14 | 0.95 | 157 | 81  | 40 | 101 | 5.3 | 0 |
| 1 | 47 | 23.0 | 80   | 1 | 1 | 1 | 0 | 0 | 1 | 116 | 66  | 53 | 7.8  | 7.8 | 7.8   | 98  | 13 | 0.94 | 128 | 61  | 37 | 80  | 5.9 | 0 |
| 1 | 45 | 21.1 | 76   | 2 | 2 | 1 | 0 | 0 | 1 | 126 | 83  | 92 | 6.8  | 7.1 | 6.95  | 116 | 10 | 0.58 | 284 | 67  | 98 | 181 | 5.6 | 1 |
| 2 | 42 | 22.7 | 78   | 1 | 1 | 1 | 0 | 0 | 0 | 129 | 86  | 65 | 6.9  | 6.8 | 6.85  | 105 | 11 | 0.61 | 174 | 45  | 76 | 93  | 5.7 | 1 |
| 1 | 55 | 21.2 | 81   | 1 | 1 | 1 | 0 | 0 | 0 | 114 | 74  | 71 | 6.7  | 6.5 | 6.6   | 94  | 12 | 0.99 | 187 | 44  | 53 | 124 | 5.4 | 0 |
| 1 | 63 | 28.1 | 98.5 | 2 | 2 | 2 | 1 | 1 | 1 | 120 | 93  | 64 | 6.3  | 6.1 | 6.2   | 127 | 15 | 1.06 | 178 | 80  | 56 | 113 | 6.5 | 1 |
| 2 | 59 | 21.9 | 83   | 1 | 1 | 1 | 1 | 0 | 0 | 146 | 87  | 56 | 8.8  | 8.2 | 8.5   | 97  | 12 | 0.73 | 219 | 39  | 80 | 135 | 5.9 | 1 |
| 1 | 66 | 25.8 | 91   | 1 | 1 | 1 | 0 | 0 | 0 | 138 | 88  | 69 | 9    | 8.8 | 8.9   | 110 | 10 | 0.83 | 181 | 52  | 49 | 128 | 5.4 | 1 |
| 1 | 46 | 28.4 | 93   | 1 | 1 | 1 | 1 | 1 | 0 | 124 | 76  | 83 | 7.8  | 8   | 7.9   | 126 | 14 | 1.07 | 204 | 185 | 40 | 135 | 6.2 | 1 |
| 1 | 55 | 21.7 | 83   | 2 | 1 | 2 | 1 | 0 | 1 | 134 | 90  | 71 | 9.4  | 9.2 | 9.3   | 113 | 17 | 0.82 | 249 | 131 | 61 | 171 | 5.6 | 0 |
| 1 | 41 | 24.1 | 87   | 2 | 1 | 1 | 1 | 0 | 1 | 134 | 92  | 64 | 6.4  | 6.3 | 6.35  | 95  | 11 | 0.91 | 151 | 184 | 31 | 97  | 5.3 | 1 |
| 1 | 34 | 25.2 | 90.5 | 1 | 1 | 1 | 0 | 0 | 0 | 134 | 89  | 62 | 7.4  | 7.5 | 7.45  | 97  | 13 | 0.95 | 216 | 147 | 51 | 133 | 5.3 | 1 |
| 2 | 52 | 23.6 | 79.5 | 1 | 1 | 1 | 0 | 0 | 0 | 125 | 76  | 56 | 7.1  | 7.3 | 7.2   | 99  | 13 | 0.72 | 164 | 41  | 69 | 97  | 5.9 | 0 |
| 1 | 41 | 22.8 | 82   | 2 | 2 | 1 | 0 | 0 | 1 | 125 | 86  | 79 | 6.4  | 6.2 | 6.3   | 93  | 12 | 0.78 | 195 | 213 | 50 | 107 | 5.4 | 1 |
| 1 | 57 | 22.9 | 83.5 | 2 | 2 | 2 | 0 | 0 | 1 | 126 | 86  | 55 | 8.7  | 8.3 | 8.5   | 105 | 20 | 0.81 | 214 | 358 | 45 | 127 | 5.3 | 0 |
| 1 | 48 | 21.8 | 84   | 1 | 2 | 1 | 0 | 0 | 0 | 123 | 77  | 65 | 7.2  | 7.5 | 7.35  | 88  | 19 | 0.91 | 161 | 63  | 51 | 98  | 5.4 | 1 |
| 1 | 56 | 30.1 | 97   | 1 | 1 | 1 | 0 | 0 | 1 | 133 | 72  | 60 | 5    | 4.9 | 4.95  | 89  | 12 | 0.81 | 203 | 363 | 39 | 102 | 5.4 | 1 |
| 2 | 50 | 25.1 | 92   | 1 | 1 | 1 | 0 | 0 | 0 | 127 | 83  | 72 | 6.7  | 6.6 | 6.65  | 100 | 9  | 0.73 | 201 | 43  | 69 | 126 | 5.8 | 1 |
| 1 | 58 | 23.8 | 85   | 1 | 1 | 1 | 0 | 0 | 0 | 93  | 65  | 53 | 7.8  | 7.7 | 7.75  | 99  | 16 | 0.95 | 200 | 87  | 52 | 128 | 5.5 | 1 |
| 2 | 65 | 30.5 | 105  | 1 | 1 | 1 | 1 | 1 | 1 | 138 | 89  | 73 | 10.1 | 10  | 10.05 | 119 | 10 | 0.75 | 155 | 132 | 35 | 98  | 6.4 | 1 |
| 1 | 49 | 25.0 | 94   | 2 | 1 | 1 | 0 | 0 | 1 | 122 | 88  | 67 | 7.1  | 6.9 | 7     | 114 | 8  | 0.98 | 206 | 102 | 35 | 152 | 5.7 | 1 |
| 1 | 53 | 30.7 | 113  | 1 | 1 | 1 | 1 | 0 | 0 | 159 | 103 | 68 | 8.4  | 8.2 | 8.3   | 101 | 19 | 0.9  | 117 | 42  | 47 | 66  | 5.7 | 1 |
| 2 | 70 | 25.6 | 91   | 1 | 1 | 1 | 1 | 0 | 1 | 146 | 78  | 61 | 8.9  | 8.7 | 8.8   | 114 | 19 | 0.51 | 267 | 91  | 43 | 221 | 6.2 | 0 |
| 1 | 56 | 27.0 | 94   | 2 | 2 | 2 | 0 | 0 | 1 | 119 | 77  | 67 | 7.8  | 7.7 | 7.75  | 116 | 10 | 0.85 | 246 | 332 | 43 | 121 | 5.7 | 1 |
| 1 | 50 | 23.6 | 87   | 2 | 2 | 2 | 0 | 0 | 0 | 121 | 79  | 53 | 7.4  | 7.2 | 7.3   | 92  | 11 | 0.85 | 189 | 96  | 49 | 126 | 5.4 | 1 |
| 2 | 66 | 29.3 | 103  | 1 | 1 | 1 | 0 | 1 | 1 | 136 | 80  | 57 | 7.1  | 6.8 | 6.95  | 125 | 17 | 0.64 | 355 | 152 | 58 | 261 | 6.9 | 1 |
| 1 | 71 | 21.1 | 72   | 2 | 1 | 1 | 0 | 0 | 0 | 132 | 89  | 70 | 9.3  | 9.1 | 9.2   | 93  | 20 | 1.05 | 164 | 53  | 66 | 92  | 5.3 | 1 |
| 1 | 55 | 27.0 | 88   | 1 | 1 | 1 | 1 | 0 | 1 | 136 | 85  | 55 | 7.4  | 7.1 | 7.25  | 103 | 14 | 0.88 | 193 | 215 | 38 | 119 | 5.8 | 1 |



|   |    |      |      |   |   |   |   |   |   |     |     |    |     |     |      |     |    |      |     |     |    |     |     |   |
|---|----|------|------|---|---|---|---|---|---|-----|-----|----|-----|-----|------|-----|----|------|-----|-----|----|-----|-----|---|
| 1 | 55 | 22.4 | 78   | 2 | 1 | 1 | 0 | 0 | 0 | 111 | 73  | 58 | 9.1 | 8.9 | 9    | 95  | 21 | 1.03 | 210 | 124 | 54 | 140 | 5.7 | 1 |
| 1 | 42 | 24.7 | 87   | 2 | 1 | 2 | 0 | 0 | 0 | 119 | 77  | 53 | 7.8 | 7.9 | 7.85 | 99  | 14 | 0.98 | 208 | 58  | 69 | 138 | 5.7 | 0 |
| 1 | 55 | 18.2 | 73   | 2 | 1 | 1 | 0 | 0 | 0 | 110 | 76  | 65 | 8.2 | 8.1 | 8.15 | 105 | 12 | 1.01 | 171 | 96  | 61 | 99  | 5.4 | 1 |
| 1 | 65 | 24.6 | 83   | 1 | 1 | 1 | 0 | 0 | 0 | 118 | 83  | 60 | 7.2 | 7.4 | 7.3  | 105 | 11 | 0.85 | 182 | 81  | 44 | 125 | 5.8 | 1 |
| 2 | 64 | 21.2 | 76   | 1 | 1 | 1 | 0 | 0 | 0 | 129 | 82  | 63 | 6.2 | 6   | 6.1  | 58  | 12 | 0.78 | 235 | 106 | 88 | 130 | 5.2 | 1 |
| 1 | 47 | 24.8 | 88.5 | 1 | 2 | 1 | 0 | 0 | 0 | 123 | 79  | 58 | 8.2 | 8.3 | 8.25 | 111 | 9  | 0.99 | 205 | 98  | 43 | 148 | 5.9 | 1 |
| 1 | 62 | 23.6 | 83   | 2 | 1 | 1 | 0 | 0 | 1 | 121 | 81  | 69 | 8.6 | 8.5 | 8.55 | 103 | 12 | 0.94 | 145 | 77  | 49 | 93  | 6   | 0 |
| 2 | 55 | 22.5 | 79   | 1 | 1 | 1 | 0 | 0 | 1 | 126 | 82  | 57 | 6.9 | 6.6 | 6.75 | 93  | 12 | 0.68 | 182 | 122 | 60 | 108 | 5.9 | 0 |
| 1 | 47 | 26.4 | 90   | 1 | 2 | 1 | 1 | 0 | 0 | 130 | 96  | 65 | 6.8 | 6.4 | 6.6  | 120 | 15 | 0.85 | 213 | 93  | 76 | 134 | 5.4 | 0 |
| 1 | 39 | 33.0 | 71   | 2 | 1 | 1 | 1 | 0 | 0 | 157 | 102 | 90 | 8.4 | 8   | 8.2  | 109 | 11 | 0.89 | 209 | 121 | 73 | 127 | 5.8 | 0 |
| 1 | 52 | 21.8 | 79   | 1 | 1 | 1 | 0 | 0 | 0 | 122 | 80  | 68 | 8.1 | 8.1 | 8.1  | 92  | 13 | 0.71 | 185 | 89  | 73 | 103 | 5.4 | 0 |
| 1 | 58 | 19.9 | 78.5 | 1 | 1 | 1 | 1 | 1 | 0 | 121 | 90  | 81 | 7.6 | 7.4 | 7.5  | 129 | 10 | 0.74 | 190 | 51  | 58 | 130 | 6.1 | 1 |
| 2 | 68 | 20.8 | 81   | 1 | 1 | 1 | 1 | 0 | 0 | 154 | 86  | 73 | 9.5 | 9.5 | 9.5  | 95  | 11 | 0.51 | 168 | 74  | 55 | 102 | 5.9 | 0 |
| 1 | 33 | 22.5 | 84   | 2 | 2 | 1 | 0 | 0 | 0 | 112 | 64  | 46 | 7.5 | 7.5 | 7.5  | 89  | 18 | 1.03 | 181 | 69  | 66 | 112 | 5.6 | 1 |
| 2 | 35 | 21.5 | 76   | 1 | 1 | 1 | 0 | 0 | 0 | 91  | 67  | 82 | 6.3 | 6.2 | 6.25 | 93  | 11 | 0.57 | 152 | 38  | 64 | 88  | 5.4 | 0 |
| 1 | 43 | 27.2 | 100  | 2 | 1 | 1 | 1 | 0 | 1 | 135 | 94  | 57 | 7.2 | 6.8 | 7    | 111 | 13 | 0.93 | 162 | 233 | 40 | 94  | 5.7 | 1 |
| 1 | 41 | 30.0 | 105  | 2 | 2 | 1 | 1 | 0 | 0 | 126 | 85  | 82 | 6.2 | 7   | 6.6  | 102 | 11 | 0.77 | 199 | 182 | 44 | 137 | 5.8 | 0 |
| 2 | 74 | 25.2 | 87   | 1 | 1 | 1 | 1 | 0 | 1 | 152 | 93  | 63 | 9.5 | 8.7 | 9.1  | 96  | 22 | 1.01 | 151 | 74  | 62 | 77  | 5.8 | 0 |
| 1 | 49 | 25.0 | 85.5 | 1 | 1 | 2 | 1 | 0 | 0 | 134 | 87  | 61 | 7.3 | 7   | 7.15 | 96  | 13 | 0.87 | 207 | 63  | 60 | 134 | 5.8 | 0 |
| 1 | 43 | 27.0 | 94   | 1 | 1 | 1 | 0 | 0 | 1 | 128 | 86  | 58 | 6.8 | 6.8 | 6.8  | 102 | 8  | 0.87 | 166 | 160 | 55 | 97  | 5.9 | 0 |
| 1 | 47 | 25.5 | 84   | 1 | 2 | 1 | 0 | 0 | 0 | 110 | 74  | 59 | 7.2 | 7.2 | 7.2  | 94  | 10 | 0.85 | 160 | 58  | 65 | 91  | 5.2 | 0 |
| 2 | 60 | 20.1 | 76.5 | 1 | 1 | 1 | 1 | 0 | 1 | 137 | 88  | 69 | 9.4 | 9.3 | 9.35 | 87  | 11 | 0.67 | 273 | 82  | 78 | 181 | 5.6 | 1 |
| 1 | 60 | 24.4 | 82   | 2 | 1 | 1 | 0 | 0 | 1 | 122 | 77  | 67 | 8.7 | 8.3 | 8.5  | 92  | 15 | 1.19 | 250 | 129 | 51 | 176 | 5.5 | 0 |
| 2 | 50 | 29.0 | 91   | 1 | 1 | 2 | 1 | 0 | 0 | 115 | 70  | 60 | 7.4 | 7.3 | 7.35 | 98  | 12 | 0.8  | 187 | 102 | 46 | 125 | 5.9 | 1 |
| 2 | 58 | 20.2 | 74.5 | 1 | 1 | 1 | 0 | 0 | 0 | 88  | 53  | 64 | 7.5 | 7.3 | 7.4  | 86  | 19 | 0.72 | 188 | 95  | 55 | 109 | 5.7 | 1 |
| 1 | 41 | 23.7 | 83   | 1 | 1 | 1 | 0 | 0 | 1 | 114 | 82  | 72 | 6.9 | 6.8 | 6.85 | 103 | 15 | 1    | 222 | 91  | 55 | 161 | 5.6 | 0 |
| 1 | 56 | 26.7 | 86.5 | 1 | 2 | 1 | 1 | 0 | 1 | 136 | 83  | 57 | 7   | 7   | 7    | 103 | 13 | 0.89 | 112 | 38  | 81 | 43  | 6   | 1 |
| 1 | 53 | 26.5 | 91   | 1 | 1 | 1 | 0 | 1 | 1 | 124 | 89  | 69 | 7.7 | 8.2 | 7.95 | 146 | 13 | 1.01 | 143 | 191 | 37 | 89  | 6.4 | 0 |
| 2 | 50 | 29.6 | 96.5 | 1 | 1 | 1 | 1 | 1 | 1 | 145 | 91  | 72 | 9.4 | 7.8 | 8.6  | 126 | 10 | 0.66 | 147 | 88  | 56 | 75  | 6.8 | 1 |

|   |    |      |       |   |   |   |   |   |   |     |     |    |      |      |      |     |    |      |     |     |    |     |      |   |
|---|----|------|-------|---|---|---|---|---|---|-----|-----|----|------|------|------|-----|----|------|-----|-----|----|-----|------|---|
| 1 | 54 | 26.5 | 92.5  | 1 | 1 | 1 | 0 | 0 | 0 | 111 | 77  | 57 | 7.8  | 7.9  | 7.85 | 98  | 18 | 1.07 | 198 | 179 | 40 | 96  | 5.4  | 0 |
| 2 | 56 | 23.1 | 83    | 1 | 1 | 1 | 0 | 0 | 0 | 121 | 77  | 59 | 6.8  | 7.2  | 7    | 88  | 15 | 0.68 | 175 | 50  | 79 | 95  | 5.9  | 0 |
| 1 | 56 | 24.3 | 84    | 1 | 1 | 1 | 0 | 0 | 1 | 120 | 79  | 67 | 7.1  | 7.2  | 7.15 | 94  | 15 | 0.81 | 263 | 52  | 46 | 199 | 5.6  | 0 |
| 1 | 61 | 26.0 | 93    | 2 | 2 | 1 | 1 | 0 | 1 | 155 | 101 | 61 | 10.1 | 9.5  | 9.8  | 111 | 16 | 1.05 | 188 | 481 | 46 | 77  | 6.2  | 0 |
| 1 | 60 | 26.2 | 90    | 1 | 1 | 1 | 1 | 1 | 1 | 132 | 86  | 77 | 7.1  | 7.7  | 7.4  | 127 | 17 | 0.96 | 146 | 107 | 53 | 84  | 6.6  | 1 |
| 1 | 43 | 26.1 | 94    | 2 | 1 | 2 | 0 | 0 | 0 | 116 | 78  | 63 | 7.7  | 7.5  | 7.6  | 100 | 13 | 0.86 | 217 | 105 | 52 | 150 | 6.2  | 0 |
| 1 | 53 | 22.2 | 83.5  | 2 | 1 | 1 | 1 | 0 | 0 | 126 | 81  | 70 | 8.2  | 8.2  | 8.2  | 87  | 15 | 0.97 | 192 | 166 | 49 | 116 | 5.5  | 1 |
| 2 | 68 | 28.5 | 100   | 1 | 1 | 1 | 1 | 0 | 1 | 126 | 90  | 64 | 7.6  | 8.1  | 7.85 | 101 | 19 | 0.83 | 181 | 74  | 73 | 105 | 5.9  | 1 |
| 2 | 48 | 21.2 | 78    | 1 | 1 | 1 | 0 | 0 | 0 | 124 | 80  | 56 | 7.1  | 7.1  | 7.1  | 95  | 10 | 0.8  | 168 | 44  | 60 | 107 | 5.5  | 1 |
| 2 | 54 | 19.9 | 70.5  | 1 | 1 | 1 | 0 | 0 | 1 | 119 | 76  | 55 | 7.4  | 7.4  | 7.4  | 82  | 12 | 0.64 | 285 | 109 | 89 | 181 | 5.7  | 0 |
| 1 | 46 | 26.2 | 88    | 1 | 1 | 1 | 0 | 0 | 1 | 122 | 86  | 51 | 7.5  | 7.4  | 7.45 | 93  | 11 | 0.97 | 228 | 183 | 41 | 166 | 5.8  | 0 |
| 1 | 56 | 20.4 | 79    | 2 | 2 | 2 | 0 | 0 | 0 | 122 | 76  | 63 | 8.5  | 8.4  | 8.45 | 96  | 12 | 1.09 | 176 | 130 | 40 | 119 | 5.4  | 1 |
| 1 | 65 | 23.4 | 85    | 2 | 2 | 1 | 0 | 0 | 1 | 111 | 78  | 64 | 7.3  | 7.2  | 7.25 | 88  | 10 | 0.92 | 163 | 64  | 62 | 98  | 5.5  | 0 |
| 1 | 67 | 21.6 | 86    | 2 | 1 | 1 | 1 | 0 | 1 | 141 | 96  | 84 | 8.6  | 8.3  | 8.45 | 100 | 13 | 1.03 | 218 | 118 | 36 | 163 | 5.7  | 0 |
| 2 | 66 | 20.3 | 77    | 1 | 1 | 1 | 1 | 0 | 1 | 126 | 83  | 62 | 9.3  | 8.8  | 9.05 | 103 | 8  | 0.64 | 193 | 91  | 60 | 122 | 6.2  | 1 |
| 1 | 58 | 23.2 | 88    | 1 | 1 | 1 | 0 | 0 | 0 | 133 | 85  | 49 | 6.3  | 6.7  | 6.5  | 97  | 8  | 0.83 | 200 | 46  | 89 | 110 | 5.4  | 1 |
| 1 | 49 | 25.7 | 88    | 1 | 1 | 1 | 1 | 0 | 0 | 121 | 86  | 68 | 8.1  | 7.6  | 7.85 | 99  | 8  | 0.86 | 229 | 100 | 57 | 154 | 5.4  | 0 |
| 2 | 46 | 20.8 | 79    | 1 | 1 | 2 | 1 | 0 | 0 | 139 | 94  | 59 | 6.5  | 7    | 6.75 | 97  | 13 | 0.76 | 155 | 60  | 48 | 96  | 5.3  | 0 |
| 1 | 50 | 23.0 | 86    | 2 | 1 | 2 | 1 | 0 | 0 | 140 | 90  | 63 | 7    | 7    | 7    | 101 | 6  | 0.86 | 204 | 118 | 67 | 126 | 5.6  | 0 |
| 1 | 55 | 22.2 | 84    | 1 | 1 | 1 | 1 | 0 | 0 | 125 | 93  | 67 | 8    | 7.9  | 7.95 | 101 | 16 | 0.89 | 191 | 65  | 49 | 138 | 5.8  | 0 |
| 2 | 67 | 26.0 | 87    | 1 | 1 | 1 | 1 | 0 | 1 | 154 | 92  | 64 | 8.2  | 7.4  | 7.8  | 96  | 13 | 0.57 | 251 | 92  | 71 | 164 | 5.9  | 1 |
| 2 | 57 | 36.6 | 111.5 | 1 | 1 | 1 | 0 | 0 | 1 | 134 | 81  | 60 | 7.4  | 7.4  | 7.4  | 83  | 12 | 0.81 | 248 | 66  | 91 | 154 | 5.5  | 1 |
| 2 | 58 | 19.1 | 76    | 1 | 1 | 1 | 0 | 1 | 1 | 122 | 83  | 79 | 8.2  | 8.1  | 8.15 | 248 | 13 | 0.72 | 259 | 126 | 48 | 167 | 10.6 | 0 |
| 2 | 55 | 20.8 | 74    | 2 | 2 | 1 | 1 | 0 | 0 | 120 | 82  | 75 | 8.2  | 11.4 | 9.8  | 90  | 9  | 0.52 | 221 | 117 | 68 | 142 | 5    | 1 |
| 1 | 41 | 25.7 | 90.5  | 2 | 1 | 2 | 1 | 0 | 1 | 133 | 91  | 77 | 7    | 6.6  | 6.8  | 94  | 10 | 0.92 | 222 | 116 | 34 | 170 | 5.8  | 0 |
| 2 | 52 | 24.4 | 81    | 1 | 1 | 1 | 0 | 0 | 1 | 132 | 82  | 64 | 8.9  | 7.2  | 8.05 | 104 | 12 | 0.73 | 193 | 255 | 34 | 126 | 5.6  | 1 |
| 1 | 53 | 23.8 | 90    | 1 | 2 | 1 | 0 | 1 | 0 | 131 | 80  | 66 | 7.2  | 7.2  | 7.2  | 131 | 14 | 0.76 | 146 | 71  | 56 | 88  | 6.4  | 1 |
| 2 | 70 | 25.9 | 90.5  | 2 | 1 | 1 | 1 | 1 | 1 | 126 | 82  | 65 | 11.5 | 9.3  | 10.4 | 129 | 15 | 0.95 | 200 | 188 | 79 | 98  | 6.9  | 0 |
| 2 | 68 | 21.0 | 79.5  | 1 | 1 | 1 | 1 | 0 | 1 | 132 | 79  | 66 | 7.8  | 7.4  | 7.6  | 111 | 8  | 0.7  | 185 | 66  | 91 | 93  | 6.2  | 0 |

|   |    |      |       |   |   |   |   |   |   |     |     |    |      |      |       |     |    |      |     |     |    |     |     |   |
|---|----|------|-------|---|---|---|---|---|---|-----|-----|----|------|------|-------|-----|----|------|-----|-----|----|-----|-----|---|
| 1 | 68 | 24.3 | 97    | 2 | 1 | 1 | 1 | 1 | 1 | 126 | 93  | 76 | 11   | 13.1 | 12.05 | 149 | 21 | 1.25 | 183 | 185 | 41 | 122 | 6.1 | 0 |
| 1 | 45 | 22.2 | 84    | 2 | 2 | 1 | 1 | 0 | 0 | 156 | 107 | 67 | 6.9  | 6.8  | 6.85  | 90  | 9  | 1.07 | 175 | 78  | 83 | 89  | 5.2 | 1 |
| 1 | 49 | 21.1 | 84    | 1 | 1 | 1 | 0 | 0 | 0 | 115 | 73  | 58 | 7.7  | 7.6  | 7.65  | 93  | 12 | 0.9  | 178 | 112 | 53 | 115 | 5.4 | 1 |
| 1 | 57 | 25.6 | 89    | 1 | 1 | 1 | 1 | 0 | 1 | 132 | 94  | 57 | 6.7  | 6.6  | 6.65  | 103 | 11 | 0.87 | 167 | 141 | 55 | 89  | 5.6 | 0 |
| 1 | 55 | 29.4 | 102.5 | 2 | 1 | 1 | 1 | 0 | 0 | 137 | 90  | 66 | 8.1  | 8    | 8.05  | 111 | 13 | 0.75 | 221 | 105 | 51 | 152 | 5.7 | 0 |
| 2 | 66 | 23.5 | 88.5  | 1 | 1 | 1 | 1 | 0 | 1 | 131 | 85  | 81 | 7.5  | 7.6  | 7.55  | 100 | 12 | 0.94 | 174 | 328 | 51 | 80  | 6   | 1 |
| 1 | 53 | 25.0 | 88    | 2 | 1 | 1 | 1 | 0 | 0 | 176 | 120 | 86 | 9.5  | 8.9  | 9.2   | 94  | 16 | 1.05 | 209 | 159 | 56 | 128 | 5.3 | 1 |
| 1 | 55 | 25.9 | 89    | 1 | 2 | 1 | 1 | 0 | 0 | 157 | 99  | 75 | 6.3  | 6.6  | 6.45  | 108 | 16 | 1.02 | 173 | 141 | 42 | 106 | 5.5 | 1 |
| 1 | 62 | 22.2 | 81    | 1 | 1 | 1 | 0 | 0 | 1 | 119 | 77  | 73 | 7.9  | 7.6  | 7.75  | 109 | 20 | 0.91 | 174 | 77  | 54 | 114 | 6.1 | 1 |
| 1 | 55 | 25.1 | 95.5  | 2 | 2 | 1 | 1 | 0 | 0 | 139 | 96  | 68 | 7.4  | 7.1  | 7.25  | 92  | 12 | 0.87 | 137 | 169 | 44 | 80  | 5.7 | 0 |
| 1 | 54 | 24.8 | 86    | 1 | 2 | 2 | 1 | 0 | 0 | 140 | 76  | 45 | 5.7  | 5.9  | 5.8   | 83  | 9  | 1.1  | 189 | 75  | 63 | 123 | 5.4 | 0 |
| 2 | 68 | 26.8 | 92    | 1 | 1 | 1 | 1 | 0 | 1 | 147 | 91  | 66 | 8.4  | 8.1  | 8.25  | 93  | 18 | 0.57 | 242 | 82  | 50 | 181 | 5.6 | 0 |
| 1 | 48 | 24.3 | 86    | 2 | 1 | 1 | 1 | 0 | 1 | 123 | 92  | 60 | 9    | 8.3  | 8.65  | 100 | 10 | 0.96 | 247 | 94  | 72 | 165 | 5.7 | 1 |
| 1 | 53 | 23.9 | 87.5  | 2 | 1 | 1 | 1 | 1 | 0 | 121 | 80  | 61 | 7.6  | 7.7  | 7.65  | 130 | 14 | 0.75 | 134 | 97  | 56 | 77  | 6.6 | 1 |
| 1 | 45 | 25.4 | 92    | 2 | 1 | 2 | 0 | 0 | 1 | 123 | 77  | 74 | 7.2  | 6.8  | 7     | 92  | 15 | 1.13 | 210 | 222 | 48 | 129 | 5.4 | 1 |
| 2 | 62 | 27.3 | 90    | 1 | 1 | 1 | 0 | 0 | 1 | 133 | 70  | 58 | 7.5  | 7.6  | 7.55  | 114 | 13 | 0.55 | 189 | 96  | 79 | 108 | 6   | 0 |
| 1 | 65 | 33.6 | 110.5 | 2 | 2 | 2 | 1 | 0 | 1 | 158 | 106 | 64 | 8.4  | 8    | 8.2   | 121 | 21 | 0.82 | 162 | 153 | 59 | 94  | 6.2 | 0 |
| 2 | 44 | 20.4 | 76    | 1 | 1 | 2 | 0 | 0 | 0 | 134 | 67  | 62 | 7    | 7    | 7     | 104 | 11 | 0.71 | 162 | 93  | 69 | 80  | 5.5 | 0 |
| 2 | 61 | 22.8 | 77    | 1 | 1 | 1 | 0 | 0 | 1 | 136 | 87  | 66 | 8.7  | 8    | 8.35  | 84  | 12 | 0.63 | 211 | 208 | 42 | 132 | 5.4 | 1 |
| 1 | 64 | 23.6 | 94.5  | 2 | 1 | 1 | 1 | 1 | 1 | 152 | 96  | 93 | 10.4 | 10   | 10.2  | 112 | 20 | 0.95 | 250 | 176 | 63 | 161 | 7.5 | 1 |
| 1 | 42 | 30.1 | 105   | 1 | 1 | 2 | 1 | 0 | 1 | 144 | 89  | 54 | 5.4  | 5.4  | 5.4   | 93  | 12 | 1.24 | 280 | 231 | 54 | 164 | 5.7 | 1 |
| 1 | 45 | 26.2 | 96    | 1 | 1 | 1 | 0 | 0 | 1 | 122 | 84  | 67 | 7.5  | 7    | 7.25  | 99  | 14 | 1    | 240 | 110 | 68 | 155 | 5.5 | 1 |
| 2 | 50 | 22.4 | 82.5  | 1 | 1 | 1 | 0 | 0 | 0 | 132 | 84  | 86 | 7.1  | 7    | 7.05  | 93  | 8  | 0.58 | 195 | 29  | 81 | 126 | 5.6 | 0 |
| 1 | 59 | 25.9 | 91    | 1 | 1 | 1 | 0 | 0 | 1 | 108 | 84  | 95 | 6.1  | 6.2  | 6.15  | 97  | 16 | 0.98 | 263 | 63  | 65 | 197 | 5.4 | 0 |
| 1 | 47 | 24.0 | 87    | 2 | 2 | 1 | 0 | 0 | 0 | 135 | 83  | 71 | 7.5  | 7.3  | 7.4   | 94  | 13 | 0.84 | 219 | 51  | 76 | 143 | 5.3 | 0 |
| 1 | 55 | 24.2 | 83.5  | 1 | 2 | 1 | 1 | 0 | 0 | 124 | 90  | 69 | 6.9  | 7.1  | 7     | 106 | 10 | 0.78 | 182 | 71  | 54 | 119 | 6   | 0 |
| 2 | 54 | 24.8 | 89    | 1 | 1 | 1 | 0 | 0 | 0 | 136 | 70  | 60 | 7.1  | 7    | 7.05  | 91  | 11 | 0.77 | 198 | 83  | 51 | 141 | 5.7 | 1 |
| 1 | 42 | 42.0 | 133   | 2 | 1 | 2 | 1 | 0 | 1 | 150 | 79  | 60 | 6.5  | 6.6  | 6.55  | 101 | 6  | 1.16 | 165 | 111 | 34 | 116 | 5.3 | 1 |
| 1 | 52 | 21.7 | 80    | 1 | 2 | 1 | 1 | 1 | 0 | 140 | 88  | 62 | 7.7  | 7.8  | 7.75  | 146 | 11 | 0.89 | 166 | 106 | 75 | 77  | 6.3 | 1 |

|   |    |      |       |   |   |   |   |   |   |     |     |    |      |      |       |     |    |      |     |     |    |     |     |   |
|---|----|------|-------|---|---|---|---|---|---|-----|-----|----|------|------|-------|-----|----|------|-----|-----|----|-----|-----|---|
| 1 | 56 | 23.0 | 85    | 2 | 2 | 2 | 0 | 0 | 0 | 126 | 87  | 63 | 8.5  | 8.1  | 8.3   | 97  | 15 | 0.97 | 184 | 86  | 56 | 114 | 5.5 | 1 |
| 1 | 57 | 23.4 | 86    | 2 | 1 | 1 | 0 | 0 | 0 | 112 | 78  | 70 | 7.9  | 8    | 7.95  | 80  | 23 | 0.85 | 193 | 77  | 54 | 130 | 5.4 | 1 |
| 1 | 54 | 24.2 | 84.5  | 2 | 1 | 1 | 1 | 0 | 1 | 141 | 91  | 53 | 9.3  | 8.8  | 9.05  | 109 | 18 | 0.96 | 239 | 104 | 48 | 178 | 5.8 | 0 |
| 1 | 63 | 21.0 | 78    | 1 | 1 | 2 | 0 | 0 | 1 | 107 | 72  | 62 | 8.3  | 8.1  | 8.2   | 95  | 13 | 0.92 | 185 | 218 | 49 | 103 | 5.4 | 1 |
| 1 | 56 | 21.0 | 78    | 1 | 2 | 1 | 1 | 0 | 0 | 132 | 93  | 81 | 7.7  | 7.5  | 7.6   | 115 | 12 | 0.94 | 217 | 97  | 86 | 134 | 5.8 | 1 |
| 2 | 62 | 22.9 | 87    | 1 | 1 | 1 | 0 | 0 | 1 | 111 | 72  | 72 | 7    | 7.1  | 7.05  | 94  | 11 | 0.74 | 168 | 85  | 61 | 102 | 5.5 | 1 |
| 1 | 43 | 26.0 | 89    | 1 | 1 | 2 | 1 | 0 | 1 | 141 | 97  | 55 | 6.7  | 6.6  | 6.65  | 90  | 11 | 0.75 | 191 | 262 | 50 | 104 | 5.4 | 0 |
| 1 | 56 | 25.4 | 96    | 1 | 1 | 1 | 0 | 0 | 0 | 120 | 82  | 56 | 7.4  | 7.4  | 7.4   | 95  | 14 | 0.99 | 173 | 91  | 62 | 102 | 5.8 | 0 |
| 1 | 40 | 22.7 | 82.5  | 1 | 1 | 2 | 1 | 0 | 1 | 132 | 87  | 77 | 7.3  | 7.2  | 7.25  | 96  | 12 | 1.15 | 183 | 220 | 39 | 117 | 5.7 | 0 |
| 2 | 74 | 23.5 | 85    | 1 | 1 | 1 | 1 | 1 | 1 | 126 | 72  | 71 | 10.4 | 10.2 | 10.3  | 130 | 17 | 0.77 | 139 | 167 | 34 | 82  | 7.1 | 1 |
| 1 | 54 | 25.4 | 100   | 2 | 1 | 1 | 1 | 1 | 1 | 140 | 86  | 74 | 6.9  | 7.1  | 7     | 142 | 13 | 0.69 | 130 | 135 | 35 | 80  | 6.8 | 0 |
| 1 | 57 | 26.0 | 93.5  | 1 | 1 | 1 | 1 | 0 | 1 | 130 | 96  | 61 | 7.1  | 7.3  | 7.2   | 89  | 19 | 1.07 | 171 | 231 | 39 | 82  | 5.4 | 0 |
| 2 | 59 | 18.0 | 68    | 1 | 1 | 1 | 0 | 0 | 0 | 117 | 83  | 65 | 7.9  | 8    | 7.95  | 104 | 14 | 0.62 | 205 | 79  | 92 | 116 | 5.6 | 0 |
| 2 | 64 | 35.2 | 105   | 1 | 1 | 1 | 1 | 0 | 0 | 139 | 82  | 73 | 8.8  | 7.9  | 8.35  | 92  | 11 | 0.82 | 201 | 150 | 49 | 128 | 5.9 | 1 |
| 1 | 48 | 23.8 | 86    | 1 | 1 | 1 | 0 | 0 | 1 | 116 | 82  | 73 | 7.6  | 7.7  | 7.65  | 100 | 10 | 0.81 | 191 | 226 | 38 | 121 | 5.9 | 0 |
| 1 | 59 | 18.5 | 65    | 2 | 1 | 1 | 0 | 0 | 0 | 109 | 67  | 60 | 9    | 9    | 9     | 85  | 16 | 0.97 | 131 | 77  | 51 | 74  | 5.6 | 1 |
| 1 | 42 | 22.4 | 86    | 1 | 1 | 1 | 0 | 0 | 0 | 111 | 78  | 64 | 7.9  | 7.7  | 7.8   | 92  | 16 | 1.06 | 185 | 36  | 59 | 136 | 5.8 | 1 |
| 2 | 57 | 16.9 | 68    | 1 | 1 | 1 | 0 | 0 | 0 | 118 | 65  | 54 | 8.2  | 8.4  | 8.3   | 91  | 11 | 0.76 | 195 | 82  | 83 | 106 | 5.8 | 1 |
| 1 | 52 | 31.2 | 113.5 | 1 | 1 | 1 | 1 | 0 | 0 | 165 | 108 | 51 | 6.5  | 6.7  | 6.6   | 106 | 18 | 0.94 | 183 | 39  | 63 | 124 | 5.4 | 1 |
| 2 | 54 | 27.6 | 83    | 1 | 1 | 1 | 0 | 0 | 0 | 118 | 67  | 50 | 7.3  | 6.2  | 6.75  | 101 | 15 | 0.76 | 194 | 88  | 63 | 120 | 5.8 | 1 |
| 1 | 56 | 23.7 | 82.5  | 1 | 1 | 1 | 1 | 0 | 1 | 124 | 94  | 65 | 7.8  | 8    | 7.9   | 90  | 23 | 1.11 | 143 | 56  | 49 | 96  | 5.5 | 1 |
| 2 | 51 | 18.7 | 68.5  | 1 | 1 | 1 | 0 | 0 | 1 | 109 | 70  | 62 | 7.4  | 7.4  | 7.4   | 83  | 13 | 0.75 | 240 | 37  | 73 | 175 | 5.1 | 1 |
| 1 | 60 | 26.8 | 94.5  | 2 | 2 | 2 | 0 | 0 | 0 | 132 | 89  | 60 | 7.9  | 8.2  | 8.05  | 114 | 14 | 0.87 | 205 | 112 | 59 | 134 | 5.9 | 1 |
| 1 | 69 | 22.0 | 77    | 1 | 1 | 2 | 0 | 0 | 0 | 123 | 84  | 85 | 11.2 | 9.3  | 10.25 | 87  | 18 | 1.07 | 157 | 55  | 55 | 105 | 5.6 | 1 |
| 1 | 56 | 27.1 | 92.6  | 1 | 1 | 1 | 1 | 0 | 1 | 122 | 85  | 66 | 6.3  | 6.8  | 6.55  | 114 | 19 | 1.07 | 199 | 165 | 63 | 129 | 6.4 | 1 |
| 2 | 54 | 21.2 | 78    | 1 | 1 | 1 | 0 | 0 | 0 | 124 | 85  | 55 | 6.6  | 6.5  | 6.55  | 87  | 12 | 0.57 | 189 | 32  | 45 | 143 | 5.8 | 0 |
| 2 | 54 | 30.5 | 94    | 1 | 1 | 1 | 1 | 1 | 1 | 161 | 88  | 68 | 7.2  | 7.3  | 7.25  | 119 | 12 | 0.62 | 163 | 134 | 53 | 97  | 7   | 0 |
| 2 | 69 | 24.0 | 83    | 1 | 1 | 2 | 1 | 0 | 1 | 135 | 84  | 86 | 9.5  | 9.3  | 9.4   | 88  | 14 | 0.63 | 174 | 36  | 77 | 101 | 6.1 | 1 |
| 1 | 57 | 23.5 | 83    | 2 | 2 | 1 | 0 | 0 | 0 | 130 | 84  | 66 | 7.1  | 6.7  | 6.9   | 99  | 14 | 0.98 | 202 | 73  | 47 | 153 | 6.4 | 1 |

|   |    |      |       |   |   |   |   |   |   |     |     |    |      |      |       |     |    |      |     |     |    |     |     |   |
|---|----|------|-------|---|---|---|---|---|---|-----|-----|----|------|------|-------|-----|----|------|-----|-----|----|-----|-----|---|
| 2 | 58 | 20.8 | 80.5  | 1 | 1 | 1 | 0 | 0 | 1 | 133 | 84  | 69 | 8.9  | 8.4  | 8.65  | 88  | 10 | 0.55 | 164 | 59  | 68 | 96  | 5.8 | 1 |
| 1 | 52 | 23.1 | 83    | 2 | 2 | 1 | 1 | 1 | 1 | 133 | 83  | 56 | 8.6  | 8.1  | 8.35  | 213 | 14 | 1.05 | 176 | 276 | 46 | 89  | 7.6 | 0 |
| 1 | 53 | 24.5 | 86    | 1 | 2 | 1 | 0 | 0 | 1 | 109 | 80  | 54 | 7.8  | 7.7  | 7.75  | 112 | 20 | 0.96 | 243 | 151 | 46 | 177 | 5.5 | 0 |
| 2 | 57 | 21.6 | 77    | 1 | 1 | 1 | 0 | 0 | 0 | 93  | 56  | 61 | 7.4  | 7.5  | 7.45  | 105 | 15 | 0.79 | 195 | 43  | 66 | 113 | 6   | 1 |
| 1 | 49 | 24.0 | 94.5  | 2 | 1 | 1 | 1 | 0 | 0 | 167 | 115 | 83 | 9.4  | 9.4  | 9.4   | 102 | 10 | 0.84 | 220 | 154 | 61 | 148 | 5.8 | 0 |
| 1 | 51 | 29.0 | 93    | 2 | 2 | 1 | 1 | 0 | 1 | 116 | 73  | 62 | 6.3  | 6.5  | 6.4   | 100 | 19 | 0.99 | 172 | 148 | 46 | 115 | 5.6 | 1 |
| 1 | 45 | 22.8 | 80    | 1 | 1 | 2 | 0 | 0 | 0 | 126 | 85  | 63 | 6.8  | 6.9  | 6.85  | 95  | 15 | 0.88 | 144 | 58  | 74 | 74  | 5.5 | 0 |
| 1 | 53 | 29.3 | 98.5  | 2 | 1 | 2 | 1 | 0 | 0 | 129 | 88  | 58 | 8.2  | 9.4  | 8.8   | 100 | 9  | 0.99 | 184 | 135 | 53 | 115 | 5.6 | 1 |
| 2 | 44 | 29.1 | 97    | 1 | 1 | 1 | 1 | 0 | 1 | 162 | 105 | 73 | 7.5  | 7.2  | 7.35  | 103 | 6  | 0.78 | 238 | 146 | 54 | 166 | 5.6 | 0 |
| 1 | 66 | 26.4 | 92    | 1 | 1 | 1 | 1 | 1 | 1 | 146 | 91  | 77 | 6.9  | 6.9  | 6.9   | 129 | 13 | 0.84 | 155 | 177 | 60 | 81  | 6.5 | 0 |
| 1 | 51 | 21.9 | 76    | 1 | 1 | 1 | 0 | 1 | 0 | 116 | 73  | 61 | 7.1  | 7.2  | 7.15  | 128 | 16 | 1    | 162 | 52  | 61 | 87  | 6   | 0 |
| 1 | 56 | 24.9 | 83.5  | 1 | 1 | 1 | 0 | 0 | 0 | 138 | 89  | 64 | 7.6  | 7.3  | 7.45  | 105 | 14 | 0.91 | 205 | 72  | 67 | 133 | 5.5 | 1 |
| 1 | 40 | 25.7 | 91    | 2 | 1 | 2 | 0 | 0 | 0 | 123 | 74  | 51 | 6.4  | 6.5  | 6.45  | 87  | 9  | 1.07 | 219 | 94  | 58 | 145 | 5.2 | 1 |
| 2 | 56 | 25.1 | 90    | 1 | 1 | 1 | 0 | 0 | 0 | 122 | 74  | 54 | 7    | 6.8  | 6.9   | 99  | 20 | 0.68 | 226 | 31  | 92 | 142 | 5.6 | 1 |
| 1 | 61 | 20.2 | 75    | 2 | 2 | 1 | 0 | 0 | 0 | 132 | 89  | 59 | 13.5 | 13.6 | 13.55 | 98  | 20 | 0.9  | 187 | 32  | 84 | 115 | 5.5 | 1 |
| 1 | 59 | 24.4 | 87    | 2 | 2 | 2 | 1 | 0 | 1 | 134 | 90  | 56 | 9    | 8.5  | 8.75  | 94  | 11 | 0.94 | 221 | 76  | 60 | 137 | 5.6 | 0 |
| 2 | 55 | 19.2 | 67    | 1 | 1 | 1 | 0 | 0 | 1 | 116 | 77  | 66 | 8.2  | 8.3  | 8.25  | 111 | 19 | 0.66 | 198 | 103 | 69 | 112 | 6.2 | 1 |
| 2 | 56 | 24.8 | 82    | 1 | 1 | 1 | 0 | 0 | 0 | 104 | 68  | 61 | 6.9  | 6.7  | 6.8   | 104 | 13 | 0.71 | 220 | 153 | 48 | 155 | 5.9 | 0 |
| 2 | 52 | 20.7 | 70    | 1 | 1 | 1 | 0 | 0 | 0 | 125 | 77  | 59 | 8.5  | 8.6  | 8.55  | 92  | 16 | 0.81 | 167 | 32  | 87 | 90  | 4.9 | 0 |
| 1 | 42 | 25.1 | 92    | 2 | 1 | 2 | 0 | 1 | 1 | 116 | 72  | 69 | 7.5  | 7.3  | 7.4   | 171 | 22 | 0.91 | 218 | 449 | 46 | 123 | 7.2 | 1 |
| 1 | 51 | 22.3 | 87    | 2 | 1 | 1 | 0 | 0 | 1 | 123 | 77  | 60 | 9.1  | 9.1  | 9.1   | 100 | 19 | 0.81 | 227 | 148 | 49 | 163 | 5.9 | 0 |
| 2 | 34 | 20.1 | 70.7  | 1 | 1 | 1 | 0 | 0 | 0 | 110 | 66  | 55 | 5.9  | 5.7  | 5.8   | 83  | 13 | 0.75 | 208 | 59  | 81 | 120 | 5.2 | 0 |
| 1 | 32 | 24.5 | 80.8  | 1 | 1 | 1 | 0 | 0 | 1 | 124 | 74  | 79 | 6.6  | 6.7  | 6.65  | 79  | 11 | 1    | 339 | 47  | 59 | 274 | 5.6 | 0 |
| 1 | 37 | 33.6 | 111   | 1 | 2 | 1 | 0 | 0 | 1 | 134 | 89  | 67 | 7.6  | 7.7  | 7.65  | 99  | 14 | 0.92 | 216 | 97  | 52 | 165 | 5.9 | 0 |
| 1 | 50 | 26.6 | 94.5  | 1 | 1 | 1 | 0 | 1 | 0 | 115 | 73  | 57 | 8.2  | 7.8  | 8     | 159 | 13 | 0.86 | 121 | 41  | 40 | 78  | 6.7 | 0 |
| 1 | 53 | 25.3 | 87    | 2 | 1 | 1 | 0 | 0 | 0 | 133 | 88  | 83 | 10.7 | 7    | 8.85  | 108 | 9  | 0.93 | 175 | 135 | 54 | 112 | 5.7 | 0 |
| 1 | 60 | 34.5 | 115.3 | 1 | 1 | 1 | 0 | 0 | 1 | 122 | 76  | 56 | 6.5  | 6.3  | 6.4   | 103 | 10 | 1.09 | 219 | 281 | 39 | 133 | 6   | 1 |
| 1 | 69 | 23.9 | 86.5  | 1 | 1 | 1 | 0 | 1 | 0 | 137 | 83  | 57 | 7.5  | 7.7  | 7.6   | 143 | 17 | 1    | 178 | 171 | 42 | 112 | 6.3 | 0 |
| 1 | 63 | 24.6 | 85    | 2 | 1 | 2 | 0 | 1 | 0 | 126 | 77  | 63 | 8.4  | 8.1  | 8.25  | 135 | 19 | 0.9  | 165 | 39  | 56 | 115 | 6.9 | 1 |

|   |    |      |      |   |   |   |   |   |   |     |     |     |      |     |      |     |    |      |     |     |     |     |     |   |
|---|----|------|------|---|---|---|---|---|---|-----|-----|-----|------|-----|------|-----|----|------|-----|-----|-----|-----|-----|---|
| 1 | 49 | 25.9 | 95   | 2 | 2 | 1 | 0 | 0 | 1 | 118 | 81  | 78  | 8.9  | 8.4 | 8.65 | 98  | 14 | 1.12 | 174 | 243 | 42  | 108 | 5.4 | 1 |
| 2 | 57 | 20.2 | 74   | 2 | 2 | 1 | 1 | 0 | 1 | 134 | 92  | 72  | 9.9  | 8.1 | 9    | 95  | 13 | 0.65 | 173 | 62  | 84  | 88  | 5.5 | 0 |
| 2 | 28 | 18.6 | 73   | 1 | 1 | 1 | 0 | 0 | 0 | 101 | 66  | 70  | 6    | 6.1 | 6.05 | 74  | 8  | 0.73 | 210 | 45  | 104 | 111 | 5.3 | 1 |
| 1 | 27 | 22.1 | 90   | 1 | 1 | 1 | 0 | 0 | 0 | 124 | 83  | 62  | 6.3  | 6.8 | 6.55 | 72  | 9  | 0.82 | 192 | 71  | 58  | 127 | 5.3 | 1 |
| 1 | 74 | 25.0 | 92   | 1 | 1 | 2 | 1 | 0 | 1 | 150 | 93  | 68  | 10.5 | 8.5 | 9.5  | 115 | 14 | 0.83 | 168 | 86  | 70  | 96  | 5.7 | 0 |
| 1 | 76 | 24.7 | 93.5 | 1 | 2 | 1 | 1 | 0 | 0 | 121 | 89  | 73  | 9.6  | 9   | 9.3  | 121 | 17 | 0.87 | 186 | 58  | 77  | 111 | 5.6 | 0 |
| 1 | 42 | 24.5 | 77   | 1 | 1 | 2 | 1 | 0 | 0 | 160 | 109 | 68  | 6.7  | 7.1 | 6.9  | 91  | 10 | 0.73 | 176 | 53  | 59  | 112 | 5.2 | 0 |
| 1 | 49 | 24.8 | 92   | 1 | 2 | 1 | 1 | 0 | 1 | 132 | 97  | 70  | 7.2  | 7   | 7.1  | 106 | 8  | 0.75 | 190 | 240 | 38  | 128 | 5.5 | 0 |
| 1 | 50 | 26.5 | 99   | 1 | 1 | 2 | 0 | 0 | 0 | 118 | 83  | 53  | 6.9  | 7.2 | 7.05 | 89  | 11 | 0.74 | 171 | 55  | 45  | 118 | 5.5 | 0 |
| 2 | 50 | 17.1 | 65   | 1 | 1 | 1 | 1 | 0 | 0 | 131 | 93  | 70  | 8.9  | 8.3 | 8.6  | 98  | 9  | 0.59 | 170 | 46  | 80  | 91  | 5.4 | 1 |
| 1 | 68 | 22.5 | 79   | 2 | 1 | 1 | 1 | 1 | 1 | 138 | 98  | 60  | 8.7  | 8   | 8.35 | 117 | 20 | 0.93 | 164 | 149 | 41  | 106 | 8.6 | 1 |
| 1 | 45 | 23.8 | 89   | 1 | 1 | 1 | 0 | 0 | 1 | 128 | 83  | 76  | 6.5  | 6.4 | 6.45 | 85  | 16 | 0.83 | 206 | 184 | 54  | 131 | 5.8 | 0 |
| 2 | 40 | 23.1 | 74   | 1 | 1 | 1 | 0 | 0 | 1 | 124 | 73  | 62  | 6.8  | 6.9 | 6.85 | 78  | 8  | 0.71 | 239 | 74  | 58  | 183 | 5.4 | 0 |
| 1 | 57 | 26.9 | 90   | 2 | 1 | 2 | 0 | 0 | 0 | 132 | 82  | 50  | 7.5  | 7.7 | 7.6  | 91  | 22 | 0.89 | 154 | 119 | 45  | 93  | 6.2 | 0 |
| 1 | 41 | 20.2 | 77   | 2 | 1 | 2 | 0 | 0 | 1 | 109 | 69  | 52  | 7.3  | 7.2 | 7.25 | 88  | 16 | 1.06 | 280 | 112 | 55  | 213 | 5.4 | 0 |
| 2 | 55 | 19.8 | 81.5 | 2 | 2 | 1 | 0 | 0 | 0 | 106 | 69  | 47  | 7.8  | 7.6 | 7.7  | 96  | 14 | 0.68 | 235 | 58  | 86  | 159 | 5.4 | 1 |
| 1 | 63 | 23.1 | 90.5 | 2 | 1 | 1 | 1 | 1 | 1 | 135 | 91  | 75  | 9.7  | 9.9 | 9.8  | 131 | 8  | 0.65 | 125 | 59  | 48  | 76  | 6.7 | 1 |
| 1 | 55 | 26.5 | 92   | 1 | 2 | 2 | 1 | 0 | 1 | 146 | 103 | 58  | 7.9  | 7.8 | 7.85 | 92  | 15 | 1.27 | 251 | 240 | 52  | 177 | 5.6 | 1 |
| 1 | 64 | 24.2 | 89   | 2 | 2 | 1 | 1 | 1 | 0 | 131 | 89  | 65  | 10.5 | 9.4 | 9.95 | 360 | 17 | 0.93 | 195 | 172 | 65  | 120 | 11  | 0 |
| 1 | 66 | 24.8 | 83   | 1 | 1 | 1 | 1 | 0 | 0 | 152 | 99  | 58  | 6.5  | 7   | 6.75 | 107 | 12 | 0.92 | 187 | 127 | 57  | 119 | 6.3 | 1 |
| 2 | 58 | 20.8 | 77   | 1 | 1 | 1 | 0 | 0 | 0 | 117 | 84  | 68  | 8.2  | 7.6 | 7.9  | 87  | 10 | 0.57 | 215 | 36  | 97  | 124 | 5.5 | 1 |
| 1 | 65 | 24.3 | 89   | 1 | 2 | 2 | 0 | 1 | 0 | 117 | 79  | 61  | 7.9  | 8.1 | 8    | 141 | 7  | 0.78 | 193 | 51  | 64  | 133 | 6.5 | 0 |
| 1 | 50 | 25.8 | 93   | 1 | 2 | 1 | 1 | 0 | 0 | 146 | 92  | 91  | 8.8  | 8.6 | 8.7  | 101 | 9  | 0.84 | 195 | 187 | 40  | 128 | 5.4 | 0 |
| 1 | 57 | 26.1 | 98.5 | 1 | 1 | 1 | 1 | 0 | 0 | 141 | 90  | 58  | 10.6 | 8.2 | 9.4  | 95  | 14 | 1.02 | 236 | 164 | 57  | 154 | 6   | 0 |
| 1 | 51 | 25.0 | 90   | 2 | 1 | 1 | 0 | 0 | 1 | 108 | 81  | 66  | 7.3  | 7.2 | 7.25 | 91  | 17 | 0.97 | 261 | 140 | 49  | 193 | 5.6 | 1 |
| 1 | 43 | 29.4 | 107  | 1 | 1 | 1 | 1 | 0 | 0 | 159 | 108 | 103 | 8.7  | 8.2 | 8.45 | 100 | 20 | 1.02 | 215 | 133 | 45  | 156 | 5.9 | 1 |
| 1 | 53 | 24.6 | 84   | 1 | 1 | 2 | 0 | 0 | 0 | 127 | 81  | 63  | 6.9  | 6.9 | 6.9  | 102 | 13 | 0.94 | 217 | 142 | 45  | 158 | 5.4 | 0 |
| 2 | 55 | 33.2 | 111  | 1 | 1 | 1 | 0 | 0 | 0 | 129 | 80  | 72  | 5.7  | 6.1 | 5.9  | 95  | 12 | 0.6  | 198 | 139 | 50  | 128 | 5.8 | 1 |
| 1 | 60 | 26.3 | 94   | 2 | 1 | 1 | 1 | 1 | 1 | 136 | 95  | 88  | 9.6  | 9.4 | 9.5  | 189 | 16 | 0.87 | 228 | 324 | 41  | 155 | 7.5 | 1 |

|   |    |      |      |   |   |   |   |   |   |     |     |     |     |      |       |     |    |      |     |     |    |     |      |   |
|---|----|------|------|---|---|---|---|---|---|-----|-----|-----|-----|------|-------|-----|----|------|-----|-----|----|-----|------|---|
| 1 | 76 | 26.0 | 96   | 1 | 1 | 1 | 1 | 1 | 1 | 132 | 74  | 56  | 8.8 | 8.4  | 8.6   | 180 | 15 | 0.85 | 123 | 176 | 31 | 74  | 8.7  | 0 |
| 2 | 71 | 22.8 | 80   | 1 | 1 | 1 | 1 | 0 | 1 | 152 | 87  | 66  | 8   | 12.3 | 10.15 | 122 | 19 | 0.6  | 173 | 148 | 51 | 100 | 5.8  | 1 |
| 2 | 56 | 30.0 | 103  | 1 | 1 | 1 | 1 | 0 | 0 | 141 | 86  | 67  | 8.7 | 9    | 8.85  | 93  | 8  | 0.72 | 166 | 68  | 55 | 105 | 6.1  | 0 |
| 1 | 63 | 29.1 | 98   | 2 | 2 | 1 | 1 | 1 | 0 | 141 | 97  | 73  | 8.9 | 8.3  | 8.6   | 128 | 15 | 1.01 | 204 | 170 | 47 | 142 | 6    | 1 |
| 1 | 58 | 23.4 | 82   | 2 | 2 | 1 | 0 | 0 | 0 | 115 | 87  | 73  | 9.4 | 8.1  | 8.75  | 100 | 15 | 0.88 | 219 | 128 | 44 | 154 | 5.6  | 1 |
| 2 | 68 | 24.6 | 85   | 1 | 1 | 1 | 0 | 0 | 1 | 129 | 75  | 66  | 8.6 | 8.8  | 8.7   | 96  | 11 | 0.56 | 110 | 94  | 33 | 72  | 5.6  | 1 |
| 1 | 56 | 28.0 | 94   | 2 | 2 | 1 | 1 | 0 | 1 | 143 | 89  | 100 | 8.2 | 7.6  | 7.9   | 88  | 14 | 0.83 | 144 | 202 | 31 | 90  | 5.6  | 1 |
| 1 | 58 | 24.0 | 90   | 1 | 1 | 2 | 0 | 0 | 1 | 131 | 88  | 58  | 7.6 | 7.7  | 7.65  | 118 | 18 | 0.82 | 221 | 222 | 59 | 124 | 6    | 0 |
| 1 | 68 | 30.1 | 108  | 1 | 2 | 1 | 0 | 0 | 0 | 137 | 83  | 49  | 8   | 7.9  | 7.95  | 110 | 10 | 0.79 | 195 | 78  | 59 | 131 | 6.1  | 1 |
| 2 | 65 | 23.6 | 89   | 1 | 1 | 1 | 0 | 1 | 1 | 124 | 75  | 68  | 9.3 | 9    | 9.15  | 174 | 7  | 0.61 | 159 | 139 | 42 | 100 | 10.3 | 1 |
| 1 | 66 | 26.4 | 97   | 2 | 2 | 2 | 0 | 0 | 0 | 133 | 89  | 54  | 8.7 | 8.7  | 8.7   | 98  | 18 | 1.03 | 203 | 122 | 47 | 147 | 5.5  | 1 |
| 1 | 58 | 28.1 | 96   | 2 | 2 | 1 | 1 | 0 | 0 | 152 | 96  | 48  | 7.8 | 8.1  | 7.95  | 102 | 10 | 0.81 | 217 | 154 | 46 | 155 | 5.7  | 0 |
| 2 | 56 | 23.5 | 89   | 1 | 1 | 1 | 0 | 0 | 0 | 108 | 78  | 59  | 6.8 | 7.2  | 7     | 110 | 17 | 0.56 | 218 | 108 | 66 | 136 | 5.8  | 0 |
| 1 | 46 | 24.5 | 88   | 1 | 2 | 1 | 0 | 0 | 0 | 116 | 78  | 71  | 6.3 | 6.5  | 6.4   | 104 | 14 | 1.16 | 163 | 127 | 52 | 99  | 5.3  | 1 |
| 2 | 59 | 21.4 | 81   | 1 | 1 | 1 | 0 | 1 | 0 | 124 | 77  | 56  | 7.5 | 7.2  | 7.35  | 106 | 11 | 0.62 | 169 | 76  | 67 | 99  | 6.5  | 0 |
| 1 | 65 | 25.6 | 94   | 1 | 1 | 1 | 1 | 0 | 1 | 144 | 96  | 74  | 8.4 | 8.7  | 8.55  | 93  | 14 | 0.88 | 175 | 123 | 37 | 124 | 5.5  | 0 |
| 1 | 57 | 20.5 | 79.5 | 1 | 1 | 1 | 1 | 0 | 1 | 134 | 93  | 81  | 8.2 | 8.4  | 8.3   | 90  | 18 | 1.09 | 250 | 70  | 67 | 180 | 5.5  | 1 |
| 1 | 33 | 30.5 | 100  | 2 | 1 | 1 | 0 | 0 | 1 | 136 | 89  | 85  | 6.9 | 6.6  | 6.75  | 85  | 14 | 1.04 | 248 | 159 | 40 | 190 | 5.8  | 1 |
| 1 | 53 | 27.9 | 97   | 1 | 1 | 2 | 0 | 0 | 0 | 125 | 87  | 69  | 6.3 | 6.3  | 6.3   | 96  | 13 | 0.93 | 199 | 44  | 53 | 148 | 5.6  | 1 |
| 2 | 44 | 24.3 | 83   | 1 | 1 | 1 | 0 | 0 | 1 | 117 | 79  | 61  | 7.1 | 7.1  | 7.1   | 90  | 9  | 0.58 | 226 | 83  | 46 | 172 | 5.8  | 1 |
| 1 | 49 | 26.5 | 91.5 | 1 | 2 | 1 | 1 | 1 | 1 | 142 | 105 | 78  | 8.7 | 7.4  | 8.05  | 190 | 17 | 0.66 | 243 | 177 | 49 | 169 | 8.9  | 1 |
| 2 | 55 | 24.4 | 84   | 1 | 1 | 1 | 0 | 0 | 0 | 121 | 78  | 57  | 7.8 | 8.1  | 7.95  | 101 | 14 | 0.62 | 191 | 127 | 53 | 122 | 5.2  | 1 |
| 1 | 48 | 23.5 | 90   | 2 | 1 | 1 | 1 | 0 | 1 | 135 | 97  | 75  | 7.6 | 7.9  | 7.75  | 103 | 11 | 0.93 | 245 | 116 | 42 | 185 | 5.9  | 1 |
| 2 | 67 | 21.9 | 76   | 1 | 1 | 1 | 0 | 0 | 0 | 118 | 72  | 60  | 7.9 | 7.6  | 7.75  | 107 | 7  | 0.61 | 225 | 75  | 80 | 137 | 6.1  | 0 |
| 1 | 44 | 23.0 | 76.5 | 1 | 2 | 2 | 0 | 0 | 0 | 115 | 65  | 59  | 7.9 | 7.9  | 7.9   | 89  | 12 | 0.99 | 194 | 91  | 58 | 133 | 5.3  | 0 |
| 2 | 51 | 21.7 | 75   | 1 | 1 | 1 | 0 | 0 | 0 | 126 | 82  | 66  | 7.9 | 7.7  | 7.8   | 89  | 14 | 0.59 | 145 | 34  | 53 | 92  | 5.9  | 0 |
| 1 | 45 | 22.8 | 84   | 1 | 2 | 1 | 0 | 0 | 0 | 117 | 79  | 69  | 7.7 | 7.7  | 7.7   | 103 | 16 | 0.95 | 206 | 107 | 54 | 157 | 6    | 1 |
| 2 | 46 | 22.6 | 84   | 1 | 1 | 1 | 0 | 0 | 0 | 109 | 71  | 64  | 6.8 | 6.8  | 6.8   | 98  | 9  | 0.63 | 178 | 75  | 61 | 109 | 5.3  | 0 |
| 2 | 41 | 23.0 | 90   | 1 | 1 | 1 | 0 | 0 | 0 | 111 | 77  | 65  | 7.5 | 7.4  | 7.45  | 98  | 12 | 0.91 | 208 | 67  | 81 | 115 | 5.6  | 1 |

|   |    |      |       |   |   |   |   |   |   |     |     |     |     |     |      |     |    |      |     |     |    |     |     |   |
|---|----|------|-------|---|---|---|---|---|---|-----|-----|-----|-----|-----|------|-----|----|------|-----|-----|----|-----|-----|---|
| 1 | 58 | 23.3 | 85    | 2 | 1 | 1 | 0 | 0 | 1 | 133 | 89  | 76  | 8.7 | 8.9 | 8.8  | 112 | 17 | 0.91 | 249 | 148 | 49 | 178 | 5.8 | 1 |
| 2 | 54 | 21.2 | 76    | 1 | 1 | 2 | 1 | 0 | 0 | 136 | 96  | 100 | 8.7 | 8.6 | 8.65 | 102 | 13 | 0.62 | 200 | 116 | 57 | 128 | 4.8 | 0 |
| 1 | 62 | 20.5 | 71    | 1 | 1 | 1 | 0 | 0 | 0 | 126 | 88  | 57  | 6.9 | 7   | 6.95 | 90  | 13 | 0.92 | 154 | 41  | 73 | 83  | 5.3 | 1 |
| 1 | 59 | 25.0 | 94    | 2 | 1 | 1 | 1 | 1 | 1 | 122 | 84  | 72  | 8.7 | 8.1 | 8.4  | 163 | 11 | 0.74 | 234 | 277 | 34 | 150 | 7.6 | 1 |
| 1 | 35 | 29.9 | 104   | 2 | 2 | 1 | 1 | 0 | 0 | 145 | 104 | 58  | 7.4 | 7.1 | 7.25 | 107 | 13 | 0.76 | 181 | 151 | 45 | 114 | 6.1 | 1 |
| 1 | 53 | 21.1 | 80    | 1 | 1 | 1 | 1 | 1 | 1 | 124 | 90  | 63  | 7.4 | 6.9 | 7.15 | 199 | 12 | 0.71 | 147 | 161 | 34 | 92  | 7.5 | 1 |
| 1 | 47 | 28.7 | 100   | 1 | 1 | 1 | 1 | 1 | 1 | 145 | 106 | 60  | 7.3 | 7   | 7.15 | 126 | 10 | 0.63 | 133 | 266 | 37 | 66  | 6.5 | 1 |
| 2 | 58 | 25.5 | 86    | 1 | 1 | 1 | 0 | 1 | 1 | 132 | 79  | 69  | 9.5 | 9.3 | 9.4  | 159 | 16 | 0.66 | 185 | 98  | 48 | 123 | 7.9 | 1 |
| 2 | 62 | 22.8 | 78.5  | 1 | 1 | 1 | 1 | 0 | 1 | 158 | 101 | 69  | 8.4 | 8.1 | 8.25 | 120 | 18 | 0.62 | 238 | 104 | 59 | 157 | 5.5 | 0 |
| 1 | 43 | 24.0 | 91    | 1 | 2 | 1 | 0 | 0 | 0 | 116 | 82  | 62  | 7.9 | 8.1 | 8    | 93  | 12 | 0.81 | 210 | 73  | 43 | 154 | 5.4 | 0 |
| 2 | 62 | 26.7 | 86    | 2 | 1 | 1 | 0 | 1 | 1 | 127 | 70  | 52  | 7.9 | 7.7 | 7.8  | 110 | 17 | 0.89 | 174 | 80  | 48 | 118 | 6.6 | 0 |
| 2 | 52 | 19.3 | 73    | 1 | 1 | 1 | 0 | 0 | 0 | 101 | 70  | 62  | 7.6 | 7.7 | 7.65 | 80  | 17 | 0.62 | 146 | 48  | 58 | 87  | 5.4 | 1 |
| 1 | 55 | 26.7 | 93    | 1 | 1 | 1 | 0 | 0 | 1 | 128 | 82  | 66  | 7.1 | 7   | 7.05 | 86  | 12 | 0.88 | 202 | 93  | 38 | 147 | 5.1 | 1 |
| 1 | 50 | 25.7 | 84    | 1 | 1 | 2 | 0 | 0 | 0 | 126 | 85  | 58  | 7.3 | 7.1 | 7.2  | 96  | 14 | 1    | 197 | 57  | 60 | 129 | 5.8 | 0 |
| 1 | 59 | 28.9 | 102   | 1 | 1 | 1 | 1 | 0 | 1 | 127 | 90  | 70  | 7.1 | 7.3 | 7.2  | 109 | 15 | 0.8  | 143 | 64  | 33 | 101 | 6   | 1 |
| 2 | 56 | 22.9 | 81    | 1 | 1 | 1 | 1 | 0 | 1 | 140 | 98  | 59  | 9   | 8.4 | 8.7  | 85  | 10 | 0.7  | 211 | 204 | 49 | 123 | 5.8 | 0 |
| 1 | 34 | 24.4 | 98    | 2 | 2 | 1 | 1 | 1 | 1 | 162 | 107 | 63  | 7.2 | 6.5 | 6.85 | 136 | 16 | 0.83 | 231 | 240 | 41 | 152 | 6.5 | 1 |
| 1 | 46 | 21.8 | 86    | 1 | 2 | 1 | 1 | 0 | 0 | 136 | 93  | 69  | 7.5 | 7.3 | 7.4  | 125 | 14 | 0.84 | 169 | 122 | 53 | 99  | 5.3 | 0 |
| 1 | 39 | 27.6 | 97    | 1 | 1 | 2 | 0 | 0 | 1 | 130 | 77  | 64  | 7.1 | 7.1 | 7.1  | 107 | 18 | 1.29 | 241 | 66  | 48 | 183 | 5.5 | 1 |
| 1 | 33 | 24.9 | 87    | 1 | 1 | 1 | 0 | 0 | 1 | 134 | 89  | 60  | 7.8 | 8.3 | 8.05 | 98  | 10 | 1.04 | 187 | 237 | 33 | 125 | 5.5 | 0 |
| 2 | 51 | 23.4 | 79.2  | 1 | 1 | 1 | 1 | 0 | 0 | 131 | 89  | 66  | 7.3 | 7.2 | 7.25 | 94  | 17 | 0.68 | 183 | 39  | 82 | 106 | 5.5 | 1 |
| 2 | 54 | 23.6 | 81    | 1 | 1 | 1 | 0 | 0 | 1 | 118 | 87  | 68  | 7.6 | 8.5 | 8.05 | 88  | 14 | 0.65 | 228 | 54  | 59 | 166 | 5.5 | 1 |
| 1 | 48 | 28.7 | 101.3 | 1 | 1 | 1 | 0 | 1 | 0 | 137 | 88  | 55  | 6.6 | 6.9 | 6.75 | 151 | 11 | 0.77 | 151 | 83  | 54 | 91  | 6.8 | 0 |
| 1 | 38 | 29.6 | 104   | 1 | 2 | 1 | 0 | 0 | 0 | 125 | 82  | 73  | 7.2 | 7.4 | 7.3  | 108 | 17 | 0.96 | 207 | 182 | 40 | 137 | 5.6 | 0 |
| 1 | 40 | 22.3 | 85.5  | 2 | 2 | 1 | 1 | 0 | 1 | 133 | 92  | 67  | 8.4 | 8.3 | 8.35 | 102 | 14 | 0.93 | 172 | 263 | 27 | 116 | 5.6 | 1 |
| 1 | 53 | 25.6 | 89    | 1 | 1 | 2 | 0 | 0 | 0 | 124 | 85  | 56  | 5.9 | 6.1 | 6    | 81  | 14 | 0.88 | 194 | 52  | 67 | 126 | 5.4 | 0 |
| 2 | 49 | 21.0 | 72    | 1 | 1 | 1 | 0 | 0 | 1 | 123 | 78  | 69  | 7.7 | 7.7 | 7.7  | 97  | 10 | 0.68 | 321 | 111 | 80 | 198 | 5.6 | 0 |
| 1 | 51 | 22.1 | 90    | 2 | 1 | 1 | 1 | 0 | 0 | 138 | 96  | 81  | 9.2 | 9   | 9.1  | 105 | 13 | 0.89 | 157 | 133 | 40 | 103 | 5.7 | 0 |
| 2 | 49 | 39.9 | 126   | 1 | 1 | 1 | 1 | 0 | 0 | 160 | 90  | 93  | 5.9 | 4.2 | 5.05 | 121 | 6  | 0.52 | 176 | 60  | 59 | 115 | 5.6 | 0 |



|   |    |      |       |   |   |   |   |   |   |     |     |    |      |      |       |     |    |      |     |     |     |     |     |   |
|---|----|------|-------|---|---|---|---|---|---|-----|-----|----|------|------|-------|-----|----|------|-----|-----|-----|-----|-----|---|
| 2 | 49 | 21.3 | 71    | 2 | 1 | 1 | 0 | 0 | 0 | 114 | 70  | 63 | 7.6  | 7.4  | 7.5   | 100 | 10 | 0.75 | 126 | 48  | 50  | 72  | 5.6 | 1 |
| 1 | 60 | 22.5 | 88    | 2 | 1 | 1 | 0 | 0 | 1 | 136 | 87  | 63 | 8.8  | 8.8  | 8.8   | 100 | 16 | 0.78 | 158 | 109 | 36  | 104 | 5.8 | 1 |
| 2 | 50 | 21.5 | 73    | 1 | 1 | 1 | 0 | 0 | 1 | 128 | 89  | 77 | 6.2  | 6.1  | 6.15  | 87  | 11 | 0.89 | 235 | 76  | 64  | 164 | 5.1 | 1 |
| 1 | 54 | 22.2 | 88    | 1 | 1 | 1 | 0 | 0 | 1 | 114 | 78  | 82 | 7.4  | 7.4  | 7.4   | 104 | 13 | 0.72 | 153 | 49  | 36  | 114 | 5.6 | 1 |
| 1 | 30 | 32.8 | 113.5 | 2 | 2 | 1 | 1 | 0 | 1 | 139 | 97  | 79 | 6.9  | 7.1  | 7     | 88  | 11 | 0.72 | 242 | 363 | 40  | 145 | 5.6 | 1 |
| 2 | 53 | 25.2 | 89    | 1 | 1 | 1 | 0 | 0 | 0 | 121 | 77  | 64 | 6.9  | 6.8  | 6.85  | 95  | 8  | 0.62 | 186 | 47  | 70  | 113 | 5.4 | 0 |
| 2 | 51 | 26.9 | 89    | 1 | 1 | 1 | 0 | 0 | 0 | 111 | 78  | 72 | 6.1  | 6    | 6.05  | 84  | 14 | 0.8  | 166 | 47  | 58  | 104 | 5.6 | 0 |
| 2 | 56 | 25.5 | 90    | 1 | 1 | 1 | 1 | 0 | 1 | 130 | 97  | 66 | 8.7  | 8.6  | 8.65  | 105 | 17 | 0.71 | 238 | 54  | 72  | 161 | 5.7 | 1 |
| 2 | 51 | 22.8 | 83    | 1 | 1 | 1 | 0 | 0 | 0 | 122 | 83  | 66 | 6.8  | 7    | 6.9   | 71  | 13 | 0.72 | 185 | 47  | 59  | 127 | 5.3 | 1 |
| 2 | 54 | 20.7 | 75.5  | 1 | 1 | 1 | 0 | 0 | 0 | 118 | 65  | 64 | 8.1  | 7.9  | 8     | 92  | 10 | 0.67 | 232 | 67  | 71  | 147 | 5.4 | 1 |
| 2 | 49 | 23.9 | 81    | 1 | 1 | 1 | 1 | 0 | 1 | 141 | 74  | 71 | 8.3  | 8.5  | 8.4   | 83  | 11 | 0.6  | 220 | 64  | 80  | 130 | 5.4 | 0 |
| 1 | 58 | 26.7 | 94    | 2 | 1 | 1 | 0 | 0 | 1 | 117 | 83  | 70 | 7.9  | 8.1  | 8     | 97  | 14 | 0.94 | 250 | 91  | 56  | 180 | 6.1 | 1 |
| 2 | 56 | 20.0 | 70    | 1 | 2 | 1 | 0 | 0 | 1 | 114 | 77  | 68 | 7.2  | 7.3  | 7.25  | 106 | 16 | 0.72 | 289 | 66  | 110 | 168 | 5.8 | 0 |
| 2 | 55 | 22.7 | 78    | 1 | 1 | 2 | 1 | 0 | 0 | 141 | 92  | 55 | 8.1  | 8.1  | 8.1   | 95  | 11 | 0.66 | 211 | 160 | 46  | 148 | 5.5 | 0 |
| 2 | 55 | 17.3 | 64    | 1 | 1 | 2 | 1 | 0 | 0 | 145 | 105 | 69 | 9.1  | 8.8  | 8.95  | 85  | 12 | 0.79 | 209 | 71  | 82  | 118 | 5.6 | 1 |
| 1 | 58 | 26.7 | 97    | 2 | 2 | 2 | 1 | 0 | 0 | 132 | 94  | 66 | 8.9  | 8.6  | 8.75  | 95  | 16 | 0.94 | 230 | 75  | 64  | 148 | 5.7 | 0 |
| 1 | 61 | 28.0 | 93    | 2 | 1 | 1 | 1 | 1 | 1 | 161 | 104 | 53 | 8    | 8.1  | 8.05  | 125 | 14 | 0.87 | 197 | 72  | 49  | 140 | 7.3 | 1 |
| 2 | 53 | 27.3 | 89    | 1 | 1 | 1 | 0 | 0 | 1 | 124 | 82  | 58 | 7.1  | 6.8  | 6.95  | 96  | 17 | 0.62 | 247 | 85  | 65  | 169 | 5.7 | 1 |
| 1 | 49 | 22.5 | 74.8  | 1 | 2 | 1 | 1 | 0 | 0 | 130 | 97  | 86 | 6.3  | 6.3  | 6.3   | 94  | 10 | 0.97 | 226 | 49  | 67  | 153 | 5.7 | 1 |
| 2 | 53 | 24.9 | 89    | 1 | 1 | 1 | 1 | 0 | 0 | 141 | 95  | 65 | 6.5  | 6.6  | 6.55  | 88  | 18 | 0.57 | 225 | 46  | 95  | 129 | 5.6 | 0 |
| 1 | 53 | 21.5 | 76    | 2 | 2 | 1 | 0 | 0 | 0 | 110 | 81  | 50 | 8    | 8    | 8     | 103 | 12 | 0.84 | 166 | 99  | 81  | 77  | 5.4 | 0 |
| 2 | 50 | 24.4 | 88    | 1 | 1 | 1 | 0 | 0 | 0 | 131 | 83  | 67 | 6.2  | 6.5  | 6.35  | 95  | 8  | 0.64 | 177 | 60  | 56  | 109 | 5.7 | 0 |
| 2 | 55 | 26.1 | 88    | 1 | 1 | 1 | 0 | 0 | 1 | 136 | 82  | 57 | 7.4  | 7.3  | 7.35  | 94  | 11 | 0.7  | 260 | 79  | 59  | 191 | 6.1 | 1 |
| 2 | 76 | 27.9 | 96    | 1 | 1 | 1 | 0 | 0 | 1 | 138 | 83  | 86 | 10.2 | 10.5 | 10.35 | 104 | 18 | 0.63 | 198 | 170 | 58  | 119 | 5.9 | 1 |
| 2 | 64 | 24.8 | 86    | 1 | 1 | 1 | 0 | 0 | 0 | 132 | 86  | 79 | 7.3  | 7.6  | 7.45  | 112 | 17 | 0.64 | 205 | 111 | 53  | 140 | 5.6 | 1 |
| 1 | 51 | 29.6 | 104   | 1 | 2 | 1 | 1 | 0 | 1 | 139 | 87  | 68 | 7.2  | 6.6  | 6.9   | 109 | 14 | 0.64 | 137 | 111 | 50  | 79  | 5.7 | 0 |
| 2 | 43 | 21.8 | 82    | 1 | 1 | 1 | 0 | 0 | 0 | 102 | 72  | 73 | 7.5  | 7.7  | 7.6   | 92  | 10 | 0.58 | 198 | 92  | 51  | 136 | 5.7 | 0 |
| 2 | 63 | 26.0 | 89    | 1 | 1 | 1 | 0 | 0 | 1 | 113 | 68  | 73 | 7.1  | 7.2  | 7.15  | 112 | 12 | 0.6  | 239 | 95  | 55  | 169 | 6   | 0 |
| 1 | 66 | 25.9 | 95    | 2 | 2 | 2 | 1 | 1 | 0 | 135 | 90  | 55 | 7.8  | 8    | 7.9   | 111 | 13 | 0.73 | 181 | 81  | 68  | 110 | 5.8 | 0 |

|   |    |      |      |   |   |   |   |   |   |     |     |    |      |      |      |     |    |      |     |     |     |     |     |   |
|---|----|------|------|---|---|---|---|---|---|-----|-----|----|------|------|------|-----|----|------|-----|-----|-----|-----|-----|---|
| 2 | 68 | 23.6 | 82   | 1 | 1 | 1 | 1 | 0 | 0 | 139 | 88  | 91 | 10   | 9.3  | 9.65 | 100 | 9  | 0.61 | 191 | 45  | 70  | 115 | 5.6 | 1 |
| 2 | 74 | 26.7 | 95   | 1 | 1 | 1 | 1 | 0 | 1 | 135 | 86  | 90 | 9.1  | 8.4  | 8.75 | 89  | 14 | 0.57 | 190 | 126 | 69  | 105 | 5.6 | 1 |
| 1 | 52 | 21.2 | 78   | 1 | 1 | 1 | 0 | 0 | 0 | 110 | 78  | 65 | 7.5  | 7.5  | 7.5  | 123 | 12 | 0.95 | 159 | 74  | 62  | 100 | 6.3 | 0 |
| 2 | 64 | 21.9 | 74   | 1 | 1 | 1 | 0 | 0 | 1 | 122 | 86  | 55 | 6.4  | 6.5  | 6.45 | 89  | 12 | 0.73 | 249 | 52  | 105 | 146 | 5.9 | 0 |
| 1 | 64 | 24.5 | 83.5 | 1 | 1 | 1 | 0 | 0 | 0 | 131 | 89  | 58 | 7.9  | 8.2  | 8.05 | 98  | 11 | 0.85 | 170 | 39  | 65  | 104 | 5.4 | 1 |
| 2 | 48 | 22.5 | 81   | 1 | 1 | 1 | 0 | 0 | 0 | 124 | 79  | 68 | 7.4  | 7.5  | 7.45 | 94  | 10 | 0.66 | 229 | 103 | 88  | 135 | 5.4 | 0 |
| 1 | 55 | 25.4 | 94   | 2 | 1 | 1 | 1 | 0 | 0 | 133 | 96  | 66 | 7    | 7.4  | 7.2  | 109 | 16 | 1.01 | 197 | 91  | 66  | 129 | 5.5 | 0 |
| 1 | 48 | 31.5 | 114  | 1 | 2 | 1 | 1 | 0 | 1 | 147 | 94  | 53 | 7.1  | 7.6  | 7.35 | 96  | 10 | 0.93 | 237 | 340 | 49  | 83  | 5.6 | 0 |
| 2 | 52 | 21.2 | 74   | 1 | 1 | 1 | 0 | 0 | 0 | 103 | 54  | 62 | 7.8  | 8    | 7.9  | 76  | 19 | 0.78 | 208 | 37  | 83  | 124 | 5.3 | 1 |
| 1 | 46 | 32.1 | 113  | 2 | 1 | 1 | 1 | 0 | 0 | 156 | 108 | 54 | 6.7  | 6.8  | 6.75 | 102 | 12 | 0.84 | 206 | 127 | 43  | 151 | 5.7 | 1 |
| 1 | 68 | 25.9 | 95   | 1 | 1 | 1 | 1 | 1 | 1 | 137 | 88  | 56 | 9.1  | 8.9  | 9    | 129 | 9  | 0.81 | 206 | 64  | 50  | 151 | 6.4 | 1 |
| 1 | 54 | 26.1 | 89   | 2 | 1 | 2 | 1 | 0 | 0 | 130 | 94  | 72 | 8.9  | 8.5  | 8.7  | 100 | 15 | 0.96 | 173 | 80  | 49  | 119 | 5.6 | 1 |
| 1 | 48 | 26.1 | 85   | 1 | 2 | 1 | 0 | 0 | 1 | 128 | 86  | 66 | 6.5  | 6.4  | 6.45 | 90  | 12 | 0.8  | 241 | 52  | 81  | 166 | 5.4 | 0 |
| 1 | 58 | 27.7 | 99   | 1 | 1 | 1 | 0 | 0 | 1 | 115 | 77  | 58 | 7.2  | 7.2  | 7.2  | 101 | 12 | 0.83 | 220 | 200 | 34  | 158 | 5.6 | 1 |
| 1 | 51 | 26.6 | 94   | 1 | 1 | 1 | 1 | 0 | 0 | 144 | 98  | 76 | 9.3  | 8.1  | 8.7  | 118 | 12 | 0.7  | 155 | 52  | 60  | 90  | 4.9 | 1 |
| 1 | 47 | 25.3 | 87   | 2 | 2 | 1 | 1 | 0 | 0 | 153 | 96  | 75 | 8.6  | 8.2  | 8.4  | 108 | 12 | 0.65 | 175 | 136 | 74  | 95  | 4.9 | 1 |
| 1 | 41 | 25.1 | 90   | 1 | 1 | 1 | 0 | 0 | 1 | 125 | 86  | 52 | 7.3  | 7.1  | 7.2  | 97  | 16 | 1    | 193 | 374 | 33  | 103 | 5.6 | 1 |
| 1 | 49 | 25.1 | 91   | 2 | 1 | 1 | 1 | 0 | 0 | 124 | 94  | 71 | 8.3  | 8.1  | 8.2  | 103 | 11 | 1.01 | 187 | 87  | 56  | 125 | 5.6 | 1 |
| 1 | 57 | 23.2 | 89   | 1 | 1 | 2 | 1 | 0 | 0 | 146 | 88  | 64 | 6.6  | 6.8  | 6.7  | 93  | 14 | 0.85 | 200 | 147 | 53  | 134 | 5.4 | 0 |
| 2 | 60 | 19.8 | 77   | 1 | 1 | 1 | 0 | 0 | 1 | 131 | 74  | 85 | 9.2  | 9.1  | 9.15 | 100 | 14 | 0.63 | 232 | 104 | 93  | 127 | 5.6 | 1 |
| 1 | 56 | 26.5 | 96   | 1 | 1 | 1 | 1 | 0 | 0 | 125 | 86  | 62 | 7.2  | 7.2  | 7.2  | 108 | 14 | 0.87 | 122 | 63  | 52  | 69  | 5.5 | 1 |
| 1 | 64 | 22.8 | 83   | 2 | 2 | 1 | 1 | 1 | 1 | 114 | 85  | 76 | 8.5  | 8.5  | 8.5  | 120 | 11 | 0.78 | 112 | 76  | 53  | 59  | 6.5 | 0 |
| 1 | 51 | 26.1 | 95   | 1 | 1 | 2 | 1 | 0 | 1 | 107 | 75  | 63 | 6.5  | 6.3  | 6.4  | 103 | 16 | 0.98 | 182 | 193 | 30  | 123 | 5.4 | 1 |
| 1 | 51 | 25.4 | 89   | 2 | 1 | 1 | 1 | 1 | 0 | 145 | 108 | 56 | 8.1  | 7.5  | 7.8  | 180 | 18 | 1.01 | 213 | 103 | 53  | 151 | 7.5 | 1 |
| 1 | 68 | 22.9 | 91   | 2 | 1 | 1 | 0 | 1 | 1 | 121 | 77  | 69 | 10.1 | 10.1 | 10.1 | 225 | 15 | 0.88 | 139 | 140 | 34  | 94  | 7.7 | 0 |
| 1 | 46 | 19.3 | 77   | 2 | 1 | 1 | 0 | 0 | 0 | 106 | 78  | 55 | 9.1  | 9.3  | 9.2  | 89  | 17 | 1.05 | 197 | 103 | 63  | 124 | 5.4 | 0 |
| 1 | 59 | 27.4 | 98.5 | 2 | 1 | 1 | 1 | 0 | 0 | 155 | 93  | 71 | 7.6  | 7.7  | 7.65 | 108 | 23 | 0.9  | 204 | 105 | 44  | 146 | 5.7 | 0 |
| 2 | 51 | 24.0 | 83   | 1 | 1 | 1 | 1 | 1 | 1 | 125 | 97  | 78 | 7.1  | 7.1  | 7.1  | 139 | 12 | 0.4  | 261 | 124 | 65  | 178 | 7.2 | 1 |
| 1 | 59 | 25.5 | 92   | 2 | 1 | 1 | 1 | 1 | 0 | 125 | 89  | 68 | 8.2  | 7.5  | 7.85 | 120 | 18 | 0.84 | 160 | 103 | 50  | 92  | 6.6 | 1 |

|   |    |      |      |   |   |   |   |   |   |     |    |     |      |      |       |     |    |      |     |     |    |     |      |   |
|---|----|------|------|---|---|---|---|---|---|-----|----|-----|------|------|-------|-----|----|------|-----|-----|----|-----|------|---|
| 2 | 58 | 23.1 | 81.5 | 1 | 1 | 1 | 0 | 0 | 0 | 106 | 72 | 56  | 6.7  | 6.6  | 6.65  | 106 | 17 | 0.75 | 202 | 110 | 52 | 134 | 6.1  | 1 |
| 1 | 45 | 24.7 | 95   | 2 | 1 | 1 | 0 | 0 | 1 | 108 | 72 | 82  | 7.3  | 7.3  | 7.3   | 93  | 16 | 1.09 | 219 | 215 | 34 | 150 | 5.6  | 0 |
| 2 | 41 | 22.4 | 76   | 1 | 1 | 1 | 0 | 0 | 0 | 123 | 83 | 60  | 7.4  | 7.4  | 7.4   | 86  | 11 | 0.7  | 231 | 70  | 97 | 127 | 5.5  | 1 |
| 1 | 56 | 24.6 | 94   | 2 | 1 | 2 | 0 | 0 | 0 | 124 | 89 | 53  | 7.4  | 7.5  | 7.45  | 106 | 20 | 0.81 | 156 | 186 | 44 | 93  | 5.7  | 0 |
| 2 | 65 | 23.4 | 85   | 1 | 1 | 2 | 0 | 0 | 0 | 104 | 68 | 72  | 7.7  | 7.7  | 7.7   | 75  | 11 | 0.75 | 199 | 44  | 41 | 156 | 5.8  | 0 |
| 1 | 60 | 21.6 | 82   | 1 | 1 | 1 | 0 | 0 | 0 | 108 | 78 | 77  | 9.3  | 9.3  | 9.3   | 105 | 13 | 0.81 | 206 | 70  | 88 | 116 | 5.4  | 1 |
| 1 | 35 | 24.8 | 91   | 2 | 1 | 2 | 0 | 0 | 0 | 138 | 81 | 66  | 4.5  | 4.7  | 4.6   | 89  | 15 | 1.09 | 197 | 53  | 94 | 104 | 5.4  | 0 |
| 1 | 59 | 25.2 | 90.5 | 2 | 2 | 1 | 0 | 1 | 1 | 128 | 88 | 63  | 8.3  | 8.2  | 8.25  | 143 | 13 | 0.97 | 260 | 166 | 40 | 194 | 6.8  | 1 |
| 2 | 56 | 23.7 | 80   | 1 | 1 | 1 | 0 | 0 | 0 | 114 | 71 | 63  | 8.2  | 8.4  | 8.3   | 103 | 11 | 0.62 | 209 | 122 | 57 | 134 | 5.6  | 1 |
| 1 | 56 | 22.4 | 92   | 1 | 1 | 1 | 1 | 0 | 0 | 139 | 91 | 61  | 8.7  | 8.6  | 8.65  | 108 | 20 | 0.89 | 170 | 110 | 41 | 111 | 5.9  | 0 |
| 2 | 50 | 35.5 | 105  | 1 | 1 | 1 | 0 | 0 | 0 | 116 | 80 | 71  | 5.7  | 5.7  | 5.7   | 76  | 8  | 0.64 | 187 | 58  | 60 | 118 | 5.5  | 1 |
| 1 | 58 | 21.5 | 79   | 2 | 1 | 2 | 0 | 0 | 0 | 127 | 84 | 65  | 8.3  | 8.2  | 8.25  | 119 | 19 | 0.94 | 178 | 60  | 71 | 104 | 6.2  | 1 |
| 1 | 45 | 24.9 | 92   | 2 | 2 | 1 | 0 | 0 | 1 | 130 | 85 | 47  | 7.8  | 7.3  | 7.55  | 97  | 14 | 1.01 | 223 | 221 | 49 | 142 | 5.5  | 0 |
| 1 | 44 | 23.6 | 85   | 2 | 1 | 1 | 0 | 0 | 0 | 118 | 81 | 60  | 8.4  | 8.2  | 8.3   | 88  | 14 | 0.91 | 213 | 166 | 46 | 140 | 5.4  | 0 |
| 1 | 60 | 26.3 | 87.8 | 2 | 1 | 1 | 1 | 0 | 0 | 141 | 95 | 65  | 8.3  | 7.5  | 7.9   | 94  | 16 | 0.81 | 157 | 188 | 45 | 83  | 5.9  | 0 |
| 2 | 66 | 21.8 | 78   | 1 | 1 | 1 | 1 | 1 | 1 | 148 | 98 | 102 | 9.8  | 9.8  | 9.8   | 194 | 15 | 0.69 | 214 | 92  | 43 | 168 | 8.2  | 0 |
| 1 | 52 | 31.6 | 100  | 1 | 1 | 1 | 1 | 1 | 1 | 128 | 76 | 84  | 5.5  | 5.9  | 5.7   | 131 | 10 | 0.89 | 107 | 55  | 37 | 66  | 7    | 1 |
| 2 | 49 | 20.2 | 78   | 1 | 1 | 1 | 0 | 0 | 1 | 110 | 77 | 61  | 7.2  | 7.5  | 7.35  | 89  | 15 | 0.84 | 242 | 62  | 73 | 159 | 5.4  | 1 |
| 1 | 52 | 23.9 | 88   | 1 | 1 | 2 | 0 | 0 | 0 | 111 | 69 | 52  | 7    | 7.3  | 7.15  | 100 | 13 | 0.89 | 209 | 61  | 60 | 142 | 5.7  | 0 |
| 1 | 63 | 28.4 | 99   | 2 | 1 | 1 | 1 | 1 | 1 | 116 | 75 | 49  | 4.8  | 4.8  | 4.8   | 115 | 19 | 1.05 | 177 | 236 | 27 | 118 | 6.6  | 1 |
| 1 | 47 | 22.3 | 79   | 2 | 1 | 1 | 0 | 0 | 0 | 117 | 75 | 66  | 7.5  | 7.6  | 7.55  | 99  | 12 | 0.8  | 227 | 163 | 40 | 150 | 5.4  | 1 |
| 2 | 59 | 29.7 | 100  | 1 | 1 | 1 | 0 | 1 | 0 | 116 | 79 | 59  | 7.5  | 7.5  | 7.5   | 238 | 12 | 0.7  | 165 | 111 | 51 | 99  | 10.2 | 0 |
| 1 | 59 | 23.7 | 89   | 2 | 1 | 1 | 1 | 0 | 0 | 146 | 88 | 52  | 9.4  | 10.9 | 10.15 | 69  | 16 | 1.11 | 139 | 41  | 51 | 83  | 5.4  | 1 |
| 2 | 81 | 19.7 | 82   | 1 | 1 | 2 | 1 | 0 | 1 | 165 | 78 | 62  | 10.7 | 10.3 | 10.5  | 100 | 13 | 0.47 | 171 | 64  | 80 | 88  | 6.4  | 0 |
| 1 | 60 | 25.8 | 96   | 1 | 2 | 1 | 1 | 1 | 0 | 130 | 91 | 61  | 8.1  | 7.5  | 7.8   | 133 | 19 | 1.03 | 203 | 148 | 41 | 144 | 6.2  | 1 |
| 1 | 52 | 24.1 | 89   | 2 | 1 | 1 | 0 | 0 | 1 | 122 | 82 | 61  | 8    | 8.4  | 8.2   | 86  | 9  | 0.86 | 188 | 165 | 38 | 132 | 5.4  | 0 |
| 1 | 51 | 23.9 | 88   | 1 | 2 | 2 | 0 | 0 | 0 | 119 | 82 | 62  | 6.4  | 6.7  | 6.55  | 106 | 13 | 0.8  | 205 | 72  | 65 | 119 | 5.7  | 0 |
| 1 | 51 | 26.7 | 97   | 2 | 1 | 1 | 0 | 1 | 1 | 121 | 84 | 55  | 7.8  | 7.5  | 7.65  | 161 | 12 | 0.94 | 244 | 305 | 31 | 164 | 8.6  | 1 |
| 1 | 68 | 22.5 | 81   | 2 | 2 | 1 | 1 | 1 | 0 | 128 | 92 | 59  | 8.2  | 8.1  | 8.15  | 136 | 13 | 0.7  | 193 | 49  | 61 | 123 | 6.4  | 1 |

|   |    |      |       |   |   |   |   |   |   |     |     |    |      |      |       |     |    |      |     |     |    |     |      |   |
|---|----|------|-------|---|---|---|---|---|---|-----|-----|----|------|------|-------|-----|----|------|-----|-----|----|-----|------|---|
| 1 | 50 | 22.2 | 90    | 1 | 1 | 1 | 0 | 0 | 0 | 121 | 77  | 58 | 7.5  | 7.4  | 7.45  | 104 | 9  | 1.04 | 192 | 62  | 70 | 122 | 5.4  | 0 |
| 2 | 43 | 19.7 | 71    | 1 | 1 | 1 | 0 | 0 | 0 | 116 | 82  | 72 | 7.2  | 7.3  | 7.25  | 90  | 10 | 0.65 | 187 | 39  | 77 | 108 | 5.4  | 0 |
| 1 | 50 | 27.0 | 93    | 2 | 2 | 1 | 1 | 1 | 0 | 139 | 100 | 64 | 7.9  | 7.6  | 7.75  | 122 | 10 | 0.85 | 201 | 150 | 50 | 132 | 6.5  | 1 |
| 2 | 57 | 23.6 | 80    | 1 | 1 | 2 | 0 | 0 | 1 | 124 | 78  | 50 | 8.4  | 8.6  | 8.5   | 106 | 17 | 0.81 | 261 | 89  | 66 | 181 | 5.7  | 0 |
| 1 | 51 | 25.2 | 92    | 2 | 1 | 1 | 0 | 0 | 0 | 110 | 71  | 44 | 8    | 7.8  | 7.9   | 104 | 13 | 0.89 | 180 | 179 | 47 | 108 | 5.8  | 1 |
| 1 | 55 | 25.0 | 91    | 1 | 1 | 1 | 1 | 0 | 1 | 138 | 87  | 68 | 7.7  | 7.6  | 7.65  | 98  | 17 | 0.88 | 200 | 117 | 51 | 133 | 5.8  | 0 |
| 1 | 93 | 20.2 | 79    | 2 | 1 | 1 | 0 | 1 | 1 | 117 | 69  | 77 | 13.2 | 12.5 | 12.85 | 344 | 16 | 1.22 | 180 | 229 | 40 | 105 | 16.4 | 1 |
| 1 | 56 | 26.0 | 92    | 1 | 1 | 1 | 1 | 0 | 0 | 115 | 87  | 68 | 7.8  | 7.8  | 7.8   | 86  | 10 | 0.88 | 175 | 94  | 45 | 118 | 5.5  | 0 |
| 2 | 56 | 25.6 | 88    | 1 | 1 | 1 | 0 | 0 | 0 | 119 | 73  | 58 | 7.4  | 7.5  | 7.45  | 95  | 12 | 0.53 | 210 | 105 | 48 | 157 | 6    | 0 |
| 1 | 46 | 26.8 | 90    | 2 | 2 | 1 | 1 | 1 | 1 | 155 | 104 | 86 | 10.7 | 10.4 | 10.55 | 237 | 14 | 0.56 | 202 | 370 | 68 | 106 | 8.7  | 1 |
| 1 | 49 | 22.7 | 86    | 1 | 2 | 1 | 1 | 0 | 0 | 122 | 90  | 72 | 7.9  | 7.6  | 7.75  | 100 | 10 | 1.02 | 172 | 150 | 42 | 103 | 5.4  | 0 |
| 2 | 43 | 20.7 | 78    | 1 | 1 | 1 | 0 | 0 | 0 | 111 | 70  | 78 | 7.1  | 7    | 7.05  | 88  | 11 | 0.66 | 211 | 116 | 60 | 125 | 5.6  | 0 |
| 1 | 52 | 22.7 | 87    | 1 | 1 | 1 | 1 | 1 | 1 | 123 | 78  | 71 | 7.4  | 7.7  | 7.55  | 180 | 13 | 1.16 | 162 | 126 | 35 | 106 | 8.1  | 0 |
| 1 | 60 | 21.0 | 80    | 2 | 2 | 1 | 1 | 1 | 0 | 137 | 87  | 56 | 8.8  | 8.6  | 8.7   | 136 | 13 | 0.83 | 204 | 154 | 63 | 115 | 5.4  | 0 |
| 2 | 57 | 21.0 | 78.5  | 1 | 1 | 2 | 0 | 0 | 1 | 134 | 81  | 63 | 7.9  | 7.5  | 7.7   | 104 | 9  | 0.6  | 245 | 166 | 52 | 166 | 5.6  | 1 |
| 1 | 45 | 39.2 | 130   | 1 | 1 | 1 | 1 | 1 | 1 | 157 | 106 | 65 | 5.7  | 5.6  | 5.65  | 139 | 14 | 0.87 | 211 | 286 | 35 | 140 | 7.4  | 0 |
| 1 | 56 | 23.8 | 85    | 1 | 1 | 2 | 1 | 0 | 0 | 128 | 92  | 60 | 7.1  | 7.2  | 7.15  | 98  | 11 | 0.92 | 164 | 61  | 50 | 110 | 5.6  | 0 |
| 2 | 59 | 24.8 | 92    | 1 | 1 | 1 | 0 | 0 | 0 | 114 | 74  | 74 | 7.3  | 7.6  | 7.45  | 100 | 8  | 0.61 | 191 | 71  | 57 | 124 | 5.8  | 1 |
| 1 | 58 | 34.9 | 112.5 | 2 | 1 | 1 | 1 | 1 | 1 | 149 | 103 | 71 | 8.9  | 8.8  | 8.85  | 80  | 20 | 1.37 | 121 | 96  | 52 | 61  | 6.1  | 0 |
| 1 | 35 | 22.5 | 78    | 1 | 1 | 1 | 0 | 0 | 1 | 124 | 76  | 56 | 7.2  | 7.1  | 7.15  | 95  | 15 | 1.09 | 248 | 164 | 62 | 158 | 5.4  | 1 |
| 2 | 63 | 24.0 | 78    | 1 | 1 | 1 | 0 | 0 | 1 | 133 | 72  | 61 | 7.6  | 7.6  | 7.6   | 102 | 11 | 0.65 | 176 | 45  | 57 | 110 | 5.4  | 1 |
| 1 | 39 | 22.8 | 85.5  | 2 | 2 | 1 | 0 | 0 | 1 | 117 | 76  | 61 | 8    | 7.9  | 7.95  | 107 | 8  | 0.77 | 189 | 422 | 38 | 105 | 6    | 1 |
| 2 | 39 | 21.6 | 79    | 1 | 1 | 1 | 0 | 0 | 0 | 128 | 71  | 41 | 6.9  | 6.9  | 6.9   | 84  | 11 | 0.64 | 153 | 47  | 71 | 80  | 5.1  | 0 |
| 1 | 42 | 24.5 | 92    | 2 | 1 | 2 | 0 | 0 | 1 | 117 | 72  | 52 | 7.1  | 7.1  | 7.1   | 124 | 12 | 1.13 | 186 | 156 | 39 | 121 | 5.5  | 1 |
| 1 | 61 | 22.7 | 84    | 2 | 1 | 1 | 0 | 0 | 0 | 106 | 73  | 76 | 9.1  | 8.7  | 8.9   | 95  | 14 | 0.93 | 194 | 110 | 41 | 137 | 6.3  | 0 |
| 1 | 53 | 25.1 | 95    | 2 | 2 | 2 | 1 | 1 | 1 | 130 | 91  | 56 | 7.4  | 7.4  | 7.4   | 127 | 15 | 1.01 | 166 | 301 | 34 | 88  | 5.5  | 1 |
| 1 | 55 | 23.5 | 84    | 1 | 2 | 1 | 1 | 0 | 0 | 136 | 83  | 65 | 6.7  | 6.6  | 6.65  | 89  | 13 | 0.78 | 162 | 57  | 48 | 110 | 6    | 0 |
| 2 | 63 | 28.2 | 91    | 1 | 1 | 1 | 1 | 0 | 1 | 147 | 78  | 63 | 8.4  | 8.7  | 8.55  | 92  | 10 | 0.69 | 290 | 70  | 71 | 210 | 5.9  | 1 |
| 1 | 56 | 24.0 | 88    | 1 | 1 | 1 | 0 | 0 | 0 | 126 | 87  | 64 | 7.8  | 7.9  | 7.85  | 106 | 16 | 0.99 | 193 | 86  | 61 | 126 | 5.6  | 0 |

|   |    |      |      |   |   |   |   |   |   |     |     |    |      |      |       |     |    |      |     |     |    |     |     |   |
|---|----|------|------|---|---|---|---|---|---|-----|-----|----|------|------|-------|-----|----|------|-----|-----|----|-----|-----|---|
| 2 | 55 | 44.0 | 134  | 2 | 1 | 1 | 1 | 0 | 1 | 160 | 110 | 59 | 6.8  | 6.6  | 6.7   | 101 | 13 | 0.63 | 199 | 150 | 39 | 141 | 5.7 | 0 |
| 1 | 56 | 23.5 | 86.5 | 2 | 1 | 1 | 0 | 0 | 1 | 125 | 83  | 58 | 8.3  | 8.3  | 8.3   | 115 | 16 | 0.71 | 277 | 157 | 55 | 198 | 6.4 | 1 |
| 2 | 66 | 24.9 | 87   | 1 | 1 | 1 | 0 | 0 | 1 | 135 | 85  | 65 | 8.4  | 8.4  | 8.4   | 95  | 23 | 1    | 238 | 74  | 62 | 169 | 5.6 | 1 |
| 2 | 53 | 25.5 | 88   | 1 | 1 | 1 | 0 | 0 | 0 | 121 | 71  | 56 | 6.3  | 6.3  | 6.3   | 97  | 15 | 0.74 | 224 | 122 | 48 | 154 | 5.6 | 1 |
| 2 | 51 | 19.0 | 70   | 1 | 1 | 1 | 0 | 0 | 0 | 123 | 72  | 60 | 7.2  | 7.3  | 7.25  | 96  | 17 | 0.74 | 183 | 55  | 88 | 97  | 5.4 | 0 |
| 1 | 55 | 22.8 | 84   | 2 | 2 | 1 | 0 | 0 | 0 | 119 | 88  | 61 | 8.6  | 8.1  | 8.35  | 103 | 14 | 0.88 | 197 | 79  | 53 | 131 | 5.7 | 1 |
| 2 | 54 | 23.4 | 85   | 1 | 1 | 1 | 1 | 0 | 1 | 102 | 64  | 50 | 7.1  | 7.2  | 7.15  | 102 | 14 | 0.61 | 135 | 67  | 72 | 66  | 5.7 | 0 |
| 2 | 65 | 22.8 | 87   | 1 | 1 | 1 | 1 | 0 | 1 | 156 | 95  | 64 | 9.7  | 10.1 | 9.9   | 105 | 17 | 0.69 | 174 | 126 | 75 | 84  | 6   | 1 |
| 1 | 60 | 26.4 | 93   | 2 | 1 | 1 | 1 | 1 | 1 | 128 | 82  | 73 | 7.9  | 8.3  | 8.1   | 179 | 18 | 1.15 | 110 | 155 | 39 | 54  | 7.5 | 1 |
| 1 | 59 | 24.0 | 88   | 1 | 1 | 1 | 1 | 0 | 1 | 124 | 84  | 65 | 9.5  | 9    | 9.25  | 93  | 16 | 1.05 | 166 | 47  | 58 | 109 | 5.5 | 1 |
| 1 | 49 | 28.1 | 96   | 1 | 1 | 2 | 0 | 0 | 0 | 127 | 80  | 54 | 6.4  | 6.7  | 6.55  | 92  | 16 | 1.1  | 153 | 119 | 41 | 100 | 5.5 | 0 |
| 1 | 54 | 32.2 | 106  | 1 | 1 | 1 | 1 | 0 | 1 | 128 | 87  | 72 | 6.4  | 6.4  | 6.4   | 110 | 17 | 1.09 | 147 | 133 | 38 | 94  | 6.2 | 0 |
| 2 | 67 | 20.2 | 84   | 1 | 1 | 1 | 0 | 0 | 0 | 137 | 71  | 50 | 6.9  | 6.9  | 6.9   | 92  | 11 | 0.65 | 226 | 53  | 72 | 146 | 5.7 | 0 |
| 2 | 58 | 22.3 | 78   | 1 | 1 | 1 | 1 | 1 | 1 | 142 | 85  | 73 | 8.2  | 8.1  | 8.15  | 130 | 11 | 0.62 | 177 | 66  | 53 | 118 | 6.2 | 1 |
| 1 | 63 | 24.3 | 87   | 1 | 1 | 1 | 1 | 1 | 1 | 135 | 93  | 59 | 10.2 | 10   | 10.1  | 206 | 17 | 1.1  | 202 | 462 | 31 | 92  | 9.5 | 1 |
| 2 | 43 | 17.0 | 57.5 | 1 | 1 | 1 | 0 | 0 | 0 | 125 | 68  | 62 | 7.5  | 8.1  | 7.8   | 107 | 12 | 0.67 | 187 | 64  | 58 | 125 | 5.4 | 1 |
| 1 | 53 | 25.1 | 89   | 2 | 1 | 1 | 0 | 0 | 0 | 113 | 80  | 60 | 7.4  | 7.4  | 7.4   | 86  | 13 | 1.24 | 202 | 55  | 41 | 156 | 5.9 | 1 |
| 2 | 51 | 24.5 | 85   | 1 | 1 | 1 | 0 | 0 | 0 | 104 | 69  | 68 | 6    | 6.1  | 6.05  | 94  | 6  | 0.65 | 239 | 113 | 66 | 147 | 5.4 | 1 |
| 1 | 49 | 25.9 | 95   | 2 | 2 | 1 | 1 | 0 | 1 | 119 | 82  | 71 | 7.1  | 6.9  | 7     | 104 | 11 | 0.87 | 214 | 299 | 34 | 130 | 5.5 | 0 |
| 1 | 55 | 27.2 | 89.5 | 1 | 1 | 2 | 1 | 0 | 1 | 133 | 94  | 64 | 9.6  | 13.5 | 11.55 | 106 | 14 | 0.91 | 163 | 149 | 44 | 99  | 5.5 | 0 |
| 1 | 52 | 20.7 | 74   | 2 | 1 | 1 | 0 | 0 | 0 | 88  | 60  | 54 | 7.2  | 7.1  | 7.15  | 91  | 13 | 0.84 | 162 | 77  | 50 | 102 | 5.4 | 1 |
| 1 | 46 | 25.2 | 90.5 | 1 | 1 | 1 | 0 | 0 | 0 | 122 | 85  | 55 | 6.8  | 6.9  | 6.85  | 96  | 13 | 0.86 | 201 | 68  | 82 | 118 | 5.8 | 1 |
| 1 | 52 | 23.4 | 89   | 1 | 2 | 1 | 1 | 1 | 1 | 143 | 103 | 50 | 9.4  | 9.2  | 9.3   | 179 | 11 | 0.78 | 233 | 162 | 42 | 172 | 7   | 1 |
| 2 | 53 | 24.0 | 82.5 | 1 | 1 | 1 | 0 | 0 | 1 | 102 | 74  | 83 | 7.4  | 7.3  | 7.35  | 100 | 16 | 0.7  | 271 | 131 | 55 | 189 | 5.6 | 0 |
| 2 | 55 | 16.0 | 61   | 1 | 1 | 1 | 0 | 0 | 0 | 132 | 83  | 73 | 7.8  | 8    | 7.9   | 101 | 13 | 0.72 | 160 | 95  | 54 | 88  | 5.6 | 1 |
| 1 | 73 | 28.5 | 102  | 1 | 1 | 1 | 1 | 1 | 1 | 150 | 90  | 72 | 9.4  | 9.3  | 9.35  | 142 | 9  | 0.86 | 135 | 134 | 39 | 79  | 6.2 | 0 |
| 1 | 64 | 31.1 | 104  | 1 | 1 | 2 | 1 | 0 | 1 | 131 | 88  | 61 | 8.5  | 8.1  | 8.3   | 105 | 13 | 0.8  | 154 | 219 | 43 | 83  | 5.9 | 0 |
| 2 | 68 | 21.6 | 86   | 1 | 1 | 1 | 0 | 0 | 1 | 123 | 89  | 70 | 9.4  | 9.2  | 9.3   | 106 | 19 | 0.86 | 203 | 116 | 53 | 131 | 6.2 | 0 |
| 1 | 72 | 19.3 | 76   | 1 | 1 | 1 | 1 | 1 | 0 | 135 | 92  | 90 | 15.5 | 16.5 | 16    | 150 | 41 | 1.38 | 151 | 75  | 54 | 91  | 8   | 1 |

|   |    |      |      |   |   |   |   |   |   |     |     |    |     |     |      |     |    |      |     |     |     |     |     |   |
|---|----|------|------|---|---|---|---|---|---|-----|-----|----|-----|-----|------|-----|----|------|-----|-----|-----|-----|-----|---|
| 1 | 55 | 24.2 | 85   | 1 | 1 | 1 | 0 | 0 | 0 | 112 | 74  | 66 | 7.2 | 7.4 | 7.3  | 94  | 21 | 0.92 | 190 | 77  | 64  | 119 | 5.8 | 0 |
| 2 | 41 | 28.3 | 98   | 1 | 1 | 1 | 1 | 0 | 1 | 139 | 89  | 56 | 7.4 | 7.4 | 7.4  | 96  | 15 | 0.6  | 244 | 51  | 103 | 136 | 4.8 | 1 |
| 1 | 36 | 31.8 | 94   | 1 | 1 | 1 | 1 | 0 | 1 | 152 | 107 | 90 | 6.8 | 6.7 | 6.75 | 94  | 18 | 0.97 | 254 | 146 | 49  | 177 | 5.5 | 1 |
| 1 | 53 | 26.7 | 97   | 2 | 2 | 1 | 1 | 1 | 1 | 123 | 92  | 70 | 8.4 | 8.1 | 8.25 | 132 | 14 | 0.83 | 157 | 187 | 34  | 98  | 6.4 | 1 |
| 1 | 56 | 23.8 | 84   | 1 | 1 | 1 | 0 | 0 | 0 | 138 | 89  | 83 | 7.9 | 7.3 | 7.6  | 92  | 13 | 0.73 | 178 | 70  | 57  | 112 | 5.5 | 0 |
| 1 | 65 | 28.0 | 98   | 1 | 1 | 1 | 1 | 0 | 1 | 150 | 88  | 62 | 7.5 | 6.7 | 7.1  | 91  | 14 | 0.86 | 184 | 133 | 42  | 127 | 5.5 | 0 |
| 1 | 44 | 28.7 | 100  | 1 | 2 | 2 | 1 | 0 | 0 | 140 | 94  | 57 | 6.6 | 6.5 | 6.55 | 108 | 15 | 0.92 | 202 | 184 | 48  | 136 | 5.6 | 0 |
| 1 | 67 | 14.4 | 63   | 2 | 1 | 1 | 0 | 0 | 0 | 117 | 74  | 56 | 9.3 | 9.4 | 9.35 | 94  | 13 | 0.78 | 215 | 61  | 92  | 120 | 5.3 | 1 |
| 1 | 38 | 26.6 | 92   | 2 | 1 | 1 | 1 | 0 | 0 | 154 | 96  | 50 | 6.3 | 6.5 | 6.4  | 93  | 15 | 1.1  | 213 | 101 | 72  | 124 | 5   | 1 |
| 1 | 60 | 23.6 | 86   | 2 | 1 | 1 | 1 | 0 | 1 | 145 | 89  | 59 | 8.2 | 8.4 | 8.3  | 105 | 9  | 0.93 | 207 | 201 | 51  | 129 | 5.5 | 1 |
| 2 | 45 | 21.1 | 75   | 1 | 1 | 1 | 0 | 0 | 0 | 114 | 74  | 62 | 7.5 | 7.4 | 7.45 | 95  | 10 | 0.67 | 170 | 63  | 64  | 95  | 5.5 | 1 |
| 1 | 32 | 28.7 | 99   | 2 | 2 | 2 | 1 | 0 | 1 | 141 | 96  | 68 | 6.6 | 6.6 | 6.6  | 103 | 12 | 0.88 | 188 | 321 | 30  | 111 | 5.4 | 0 |
| 1 | 48 | 24.3 | 81   | 1 | 2 | 1 | 1 | 0 | 0 | 127 | 89  | 63 | 7.3 | 7.3 | 7.3  | 92  | 16 | 0.91 | 164 | 102 | 52  | 99  | 5.1 | 1 |
| 2 | 82 | 22.4 | 84   | 1 | 1 | 1 | 1 | 1 | 1 | 158 | 89  | 66 | 9   | 9.1 | 9.05 | 115 | 14 | 0.65 | 170 | 135 | 52  | 104 | 6.5 | 1 |
| 1 | 51 | 29.9 | 106  | 1 | 1 | 1 | 0 | 0 | 1 | 120 | 78  | 56 | 6.2 | 5.9 | 6.05 | 99  | 14 | 0.86 | 232 | 111 | 46  | 166 | 5.4 | 1 |
| 1 | 33 | 30.8 | 104  | 2 | 1 | 1 | 0 | 0 | 1 | 134 | 86  | 71 | 7.6 | 7.3 | 7.45 | 102 | 10 | 0.95 | 198 | 241 | 27  | 136 | 5.4 | 0 |
| 1 | 52 | 27.5 | 94   | 1 | 2 | 2 | 1 | 0 | 1 | 138 | 100 | 67 | 6.5 | 6.2 | 6.35 | 99  | 18 | 0.84 | 265 | 105 | 50  | 195 | 5.7 | 1 |
| 2 | 65 | 26.2 | 89   | 1 | 1 | 1 | 1 | 0 | 0 | 150 | 89  | 71 | 8   | 7.9 | 7.95 | 115 | 10 | 0.61 | 179 | 194 | 54  | 106 | 6.1 | 1 |
| 2 | 61 | 21.2 | 82   | 1 | 1 | 1 | 0 | 0 | 0 | 131 | 84  | 68 | 8.8 | 8.4 | 8.6  | 97  | 12 | 0.55 | 205 | 118 | 57  | 130 | 6   | 0 |
| 1 | 65 | 21.6 | 82   | 1 | 1 | 1 | 0 | 0 | 1 | 122 | 80  | 72 | 9   | 9.3 | 9.15 | 119 | 19 | 1.23 | 273 | 64  | 58  | 203 | 5.7 | 0 |
| 1 | 53 | 28.4 | 100  | 2 | 1 | 1 | 1 | 0 | 1 | 139 | 92  | 98 | 6.5 | 6.2 | 6.35 | 98  | 15 | 0.8  | 244 | 157 | 45  | 174 | 6.2 | 0 |
| 1 | 57 | 24.8 | 87   | 1 | 1 | 1 | 0 | 0 | 0 | 121 | 81  | 69 | 6.2 | 6.5 | 6.35 | 98  | 16 | 1.04 | 209 | 116 | 51  | 132 | 5.4 | 0 |
| 1 | 39 | 24.0 | 90   | 2 | 1 | 1 | 1 | 1 | 1 | 122 | 91  | 81 | 8   | 8   | 8    | 162 | 11 | 0.81 | 181 | 157 | 59  | 98  | 8.1 | 1 |
| 2 | 37 | 20.0 | 79.5 | 1 | 1 | 1 | 0 | 0 | 0 | 134 | 79  | 84 | 6.8 | 6.8 | 6.8  | 88  | 8  | 0.61 | 144 | 51  | 49  | 89  | 5.4 | 1 |
| 1 | 46 | 26.5 | 94.5 | 2 | 2 | 1 | 0 | 0 | 1 | 127 | 86  | 64 | 8.1 | 7.9 | 8    | 113 | 11 | 0.84 | 283 | 294 | 54  | 185 | 5.2 | 0 |
| 1 | 68 | 21.9 | 80   | 2 | 1 | 1 | 0 | 0 | 1 | 111 | 79  | 71 | 8   | 8   | 8    | 108 | 14 | 0.94 | 190 | 142 | 37  | 133 | 6   | 0 |
| 1 | 48 | 24.9 | 90   | 2 | 2 | 1 | 1 | 1 | 1 | 148 | 98  | 66 | 8.9 | 8.7 | 8.8  | 141 | 13 | 1.11 | 159 | 216 | 39  | 98  | 6.9 | 1 |
| 2 | 61 | 21.4 | 82   | 1 | 1 | 1 | 0 | 0 | 0 | 116 | 80  | 68 | 7.3 | 7.7 | 7.5  | 125 | 14 | 0.65 | 216 | 116 | 86  | 108 | 5.6 | 0 |
| 1 | 46 | 21.9 | 82   | 1 | 2 | 1 | 1 | 0 | 1 | 156 | 106 | 83 | 8   | 7.8 | 7.9  | 103 | 18 | 1.15 | 197 | 122 | 62  | 124 | 5.9 | 1 |

|   |    |      |      |   |   |   |   |   |   |     |     |    |     |     |      |     |    |      |     |     |    |     |     |   |
|---|----|------|------|---|---|---|---|---|---|-----|-----|----|-----|-----|------|-----|----|------|-----|-----|----|-----|-----|---|
| 1 | 59 | 24.7 | 90   | 1 | 1 | 1 | 1 | 1 | 1 | 145 | 100 | 60 | 7.6 | 7.7 | 7.65 | 117 | 17 | 0.93 | 143 | 168 | 37 | 90  | 7.2 | 1 |
| 1 | 58 | 24.0 | 88   | 2 | 1 | 1 | 0 | 0 | 1 | 114 | 75  | 62 | 7.8 | 7.3 | 7.55 | 86  | 12 | 1.08 | 151 | 117 | 48 | 94  | 5.7 | 0 |
| 1 | 67 | 24.5 | 92.5 | 1 | 2 | 2 | 1 | 0 | 1 | 119 | 81  | 56 | 7.6 | 7.9 | 7.75 | 87  | 20 | 0.95 | 117 | 89  | 56 | 59  | 5   | 1 |
| 2 | 37 | 19.3 | 73   | 1 | 1 | 1 | 0 | 0 | 0 | 121 | 79  | 70 | 6.7 | 6.5 | 6.6  | 113 | 13 | 0.5  | 196 | 43  | 80 | 117 | 5.5 | 1 |
| 2 | 52 | 19.5 | 68   | 1 | 1 | 1 | 0 | 0 | 0 | 120 | 66  | 54 | 7.9 | 7.9 | 7.9  | 95  | 18 | 1.16 | 213 | 64  | 94 | 115 | 4.8 | 1 |
| 2 | 59 | 25.6 | 89.8 | 1 | 1 | 2 | 0 | 0 | 0 | 114 | 74  | 69 | 7.2 | 7.6 | 7.4  | 91  | 16 | 0.63 | 205 | 82  | 52 | 139 | 5.6 | 1 |
| 1 | 56 | 26.1 | 88   | 1 | 2 | 1 | 1 | 0 | 0 | 121 | 92  | 63 | 9   | 8.7 | 8.85 | 95  | 12 | 1.04 | 196 | 81  | 51 | 139 | 6   | 1 |
| 2 | 37 | 18.6 | 68.5 | 1 | 2 | 1 | 0 | 0 | 0 | 110 | 67  | 61 | 6.8 | 7.1 | 6.95 | 84  | 10 | 0.64 | 203 | 40  | 98 | 112 | 5.4 | 0 |
| 1 | 37 | 24.4 | 88   | 2 | 2 | 1 | 1 | 0 | 0 | 142 | 91  | 63 | 7.9 | 7.6 | 7.75 | 90  | 12 | 1.2  | 218 | 101 | 65 | 152 | 5   | 0 |
| 2 | 53 | 23.1 | 79   | 1 | 1 | 1 | 1 | 0 | 1 | 137 | 96  | 68 | 8.8 | 8.5 | 8.65 | 87  | 16 | 0.78 | 202 | 149 | 50 | 130 | 5.4 | 1 |
| 1 | 50 | 24.4 | 84.3 | 1 | 1 | 2 | 1 | 0 | 0 | 129 | 96  | 53 | 7.9 | 7.7 | 7.8  | 95  | 14 | 0.94 | 236 | 169 | 71 | 153 | 5   | 0 |
| 1 | 58 | 26.3 | 85   | 1 | 2 | 2 | 1 | 0 | 1 | 161 | 109 | 56 | 6.5 | 6.7 | 6.6  | 105 | 12 | 1.14 | 236 | 214 | 62 | 131 | 5.4 | 1 |
| 1 | 63 | 23.2 | 86   | 2 | 2 | 1 | 0 | 0 | 0 | 132 | 87  | 68 | 9.4 | 8.3 | 8.85 | 98  | 11 | 1    | 234 | 111 | 77 | 150 | 5.3 | 1 |
| 2 | 62 | 22.1 | 89.5 | 1 | 1 | 1 | 0 | 0 | 1 | 131 | 83  | 63 | 8.7 | 8.7 | 8.7  | 97  | 10 | 0.74 | 226 | 53  | 60 | 160 | 5.7 | 1 |
| 1 | 51 | 21.4 | 82   | 2 | 1 | 1 | 0 | 0 | 0 | 119 | 79  | 70 | 7.6 | 7.8 | 7.7  | 99  | 11 | 0.94 | 217 | 148 | 47 | 154 | 5.8 | 1 |
| 2 | 29 | 20.8 | 69   | 2 | 1 | 1 | 0 | 0 | 0 | 119 | 69  | 59 | 7.3 | 7.1 | 7.2  | 88  | 10 | 0.54 | 174 | 83  | 52 | 114 | 5.1 | 1 |
| 2 | 48 | 22.9 | 78   | 1 | 1 | 1 | 0 | 0 | 0 | 110 | 68  | 51 | 5   | 5   | 5    | 90  | 9  | 0.66 | 201 | 108 | 66 | 127 | 5.4 | 0 |
| 1 | 68 | 25.3 | 87   | 2 | 2 | 1 | 1 | 1 | 1 | 143 | 94  | 83 | 8.8 | 8.8 | 8.8  | 126 | 19 | 0.96 | 209 | 74  | 79 | 130 | 5.7 | 1 |
| 2 | 56 | 19.8 | 78   | 1 | 1 | 1 | 0 | 0 | 0 | 120 | 74  | 73 | 7.8 | 7.8 | 7.8  | 93  | 11 | 0.75 | 206 | 42  | 58 | 147 | 5.3 | 0 |
| 1 | 61 | 27.4 | 90   | 1 | 1 | 1 | 1 | 0 | 0 | 147 | 95  | 59 | 8.4 | 8.6 | 8.5  | 104 | 17 | 1.11 | 195 | 57  | 51 | 141 | 6.4 | 1 |
| 2 | 58 | 24.1 | 85.5 | 1 | 1 | 1 | 0 | 0 | 0 | 119 | 82  | 71 | 6.5 | 6.7 | 6.6  | 90  | 13 | 0.76 | 193 | 83  | 63 | 113 | 5.6 | 0 |
| 1 | 63 | 23.4 | 87   | 2 | 1 | 1 | 1 | 0 | 1 | 121 | 85  | 59 | 8.8 | 9   | 8.9  | 100 | 15 | 1.03 | 141 | 104 | 58 | 79  | 5.5 | 1 |
| 1 | 74 | 22.7 | 80   | 2 | 1 | 2 | 0 | 1 | 1 | 119 | 75  | 56 | 9.3 | 9.4 | 9.35 | 83  | 7  | 0.74 | 217 | 223 | 40 | 144 | 6   | 1 |
| 1 | 61 | 24.9 | 93   | 2 | 1 | 1 | 1 | 0 | 1 | 135 | 101 | 63 | 8.4 | 8.3 | 8.35 | 92  | 19 | 0.98 | 253 | 117 | 39 | 199 | 5.9 | 1 |
| 1 | 36 | 18.3 | 76   | 1 | 1 | 1 | 0 | 0 | 0 | 121 | 88  | 64 | 7.4 | 7.4 | 7.4  | 85  | 19 | 1.07 | 210 | 88  | 49 | 155 | 5.4 | 0 |
| 1 | 49 | 25.1 | 95   | 1 | 1 | 1 | 0 | 0 | 1 | 130 | 85  | 61 | 6.6 | 6.1 | 6.35 | 107 | 14 | 0.95 | 172 | 154 | 39 | 116 | 5.5 | 0 |
| 2 | 61 | 27.3 | 95   | 1 | 1 | 2 | 1 | 0 | 1 | 142 | 100 | 57 | 8.9 | 8.4 | 8.65 | 104 | 11 | 0.61 | 191 | 64  | 86 | 114 | 5.4 | 1 |
| 1 | 42 | 26.8 | 92   | 2 | 2 | 1 | 1 | 0 | 1 | 154 | 110 | 61 | 7.7 | 7.4 | 7.55 | 102 | 12 | 0.9  | 288 | 558 | 45 | 153 | 5.7 | 0 |
| 1 | 45 | 26.4 | 91   | 2 | 1 | 1 | 0 | 0 | 0 | 124 | 88  | 72 | 7   | 6.7 | 6.85 | 84  | 12 | 1.07 | 190 | 125 | 64 | 118 | 5.2 | 1 |

|   |    |      |     |   |   |   |   |   |   |     |     |    |      |      |      |     |    |      |     |     |    |     |     |   |
|---|----|------|-----|---|---|---|---|---|---|-----|-----|----|------|------|------|-----|----|------|-----|-----|----|-----|-----|---|
| 1 | 54 | 21.8 | 78  | 1 | 2 | 2 | 0 | 0 | 0 | 113 | 81  | 59 | 7.6  | 7.6  | 7.6  | 98  | 9  | 0.91 | 186 | 50  | 48 | 129 | 5   | 0 |
| 2 | 54 | 20.5 | 71  | 1 | 1 | 2 | 1 | 1 | 1 | 141 | 79  | 58 | 8.6  | 8.5  | 8.55 | 133 | 12 | 0.69 | 180 | 84  | 53 | 118 | 6.5 | 1 |
| 1 | 46 | 26.6 | 97  | 2 | 1 | 1 | 1 | 0 | 1 | 159 | 104 | 66 | 7.9  | 7.7  | 7.8  | 121 | 14 | 0.82 | 253 | 274 | 71 | 169 | 5.8 | 1 |
| 1 | 57 | 21.1 | 82  | 2 | 1 | 2 | 1 | 0 | 0 | 152 | 111 | 88 | 9.5  | 8.8  | 9.15 | 124 | 13 | 0.85 | 227 | 163 | 57 | 159 | 5.6 | 0 |
| 2 | 66 | 25.0 | 90  | 1 | 1 | 2 | 0 | 0 | 1 | 108 | 71  | 56 | 9.1  | 8.4  | 8.75 | 92  | 16 | 0.73 | 153 | 134 | 57 | 91  | 5.5 | 1 |
| 1 | 62 | 21.7 | 78  | 2 | 1 | 2 | 0 | 1 | 1 | 127 | 85  | 79 | 10.9 | 10.9 | 10.9 | 96  | 20 | 1.02 | 138 | 54  | 65 | 69  | 5.9 | 1 |
| 2 | 59 | 18.7 | 72  | 1 | 1 | 1 | 1 | 0 | 1 | 120 | 82  | 56 | 7.4  | 7.5  | 7.45 | 90  | 17 | 0.7  | 203 | 97  | 92 | 109 | 5.4 | 0 |
| 2 | 53 | 27.2 | 88  | 1 | 1 | 1 | 1 | 0 | 0 | 138 | 92  | 56 | 6.6  | 6.5  | 6.55 | 85  | 12 | 0.67 | 198 | 66  | 63 | 142 | 5.7 | 1 |
| 2 | 59 | 22.5 | 83  | 1 | 1 | 1 | 1 | 0 | 0 | 159 | 97  | 68 | 7.7  | 7.5  | 7.6  | 94  | 14 | 0.77 | 234 | 119 | 65 | 149 | 5.4 | 1 |
| 2 | 60 | 18.4 | 70  | 1 | 1 | 1 | 0 | 0 | 0 | 120 | 77  | 61 | 7    | 6.9  | 6.95 | 88  | 6  | 0.56 | 177 | 41  | 84 | 96  | 5.7 | 0 |
| 1 | 63 | 21.4 | 83  | 1 | 2 | 1 | 1 | 0 | 0 | 118 | 80  | 54 | 7.9  | 8    | 7.95 | 99  | 16 | 0.84 | 189 | 103 | 67 | 123 | 5.8 | 0 |
| 1 | 35 | 26.7 | 94  | 1 | 1 | 1 | 1 | 0 | 1 | 134 | 92  | 77 | 6.9  | 6.7  | 6.8  | 124 | 21 | 1.18 | 201 | 370 | 38 | 119 | 6.2 | 1 |
| 1 | 70 | 23.5 | 87  | 1 | 1 | 1 | 1 | 1 | 1 | 140 | 92  | 56 | 7.6  | 7.8  | 7.7  | 134 | 17 | 0.98 | 169 | 151 | 55 | 100 | 6.9 | 0 |
| 1 | 58 | 25.9 | 92  | 1 | 2 | 1 | 1 | 1 | 1 | 137 | 98  | 70 | 11.1 | 11.1 | 11.1 | 181 | 15 | 0.92 | 201 | 199 | 37 | 140 | 7   | 1 |
| 2 | 58 | 23.1 | 76  | 1 | 1 | 1 | 1 | 0 | 1 | 119 | 85  | 72 | 8    | 8.1  | 8.05 | 105 | 13 | 0.69 | 174 | 237 | 36 | 88  | 5.7 | 0 |
| 2 | 67 | 20.9 | 73  | 1 | 1 | 1 | 0 | 0 | 0 | 103 | 65  | 67 | 7.4  | 7.5  | 7.45 | 92  | 12 | 0.68 | 180 | 137 | 81 | 61  | 5.6 | 1 |
| 1 | 55 | 28.6 | 102 | 2 | 1 | 1 | 1 | 0 | 0 | 145 | 100 | 50 | 6.4  | 6.4  | 6.4  | 97  | 15 | 1.17 | 226 | 199 | 40 | 149 | 5.9 | 1 |
| 2 | 72 | 25.8 | 93  | 1 | 1 | 1 | 1 | 0 | 1 | 165 | 102 | 64 | 7.5  | 7.6  | 7.55 | 96  | 8  | 0.73 | 253 | 107 | 77 | 155 | 5.3 | 1 |
| 1 | 67 | 25.2 | 91  | 1 | 1 | 1 | 1 | 1 | 1 | 112 | 76  | 63 | 7.3  | 7.6  | 7.45 | 109 | 15 | 1.06 | 157 | 148 | 64 | 82  | 6.5 | 0 |
| 1 | 61 | 26.4 | 97  | 2 | 2 | 1 | 1 | 1 | 0 | 140 | 88  | 69 | 8.4  | 8.7  | 8.55 | 147 | 13 | 0.93 | 178 | 165 | 49 | 108 | 7.2 | 1 |
| 2 | 49 | 26.6 | 88  | 1 | 1 | 1 | 1 | 1 | 1 | 153 | 104 | 68 | 8.7  | 8.4  | 8.55 | 113 | 14 | 0.51 | 226 | 191 | 35 | 167 | 6.5 | 1 |
| 1 | 51 | 20.0 | 76  | 2 | 2 | 1 | 0 | 0 | 1 | 110 | 75  | 80 | 7.7  | 7.5  | 7.6  | 92  | 18 | 0.84 | 248 | 191 | 54 | 170 | 5.2 | 0 |
| 1 | 42 | 26.4 | 90  | 2 | 1 | 1 | 1 | 0 | 1 | 130 | 92  | 70 | 7.3  | 7.1  | 7.2  | 108 | 11 | 0.86 | 177 | 360 | 30 | 109 | 6.1 | 0 |
| 1 | 70 | 27.2 | 95  | 2 | 1 | 1 | 1 | 0 | 1 | 135 | 92  | 65 | 8.4  | 8.3  | 8.35 | 98  | 18 | 1.15 | 209 | 277 | 45 | 108 | 6.1 | 0 |
| 2 | 43 | 19.7 | 72  | 1 | 2 | 1 | 0 | 0 | 0 | 116 | 82  | 63 | 6.3  | 6.8  | 6.55 | 91  | 12 | 0.71 | 164 | 57  | 63 | 106 | 5.4 | 0 |
| 2 | 63 | 20.3 | 71  | 1 | 1 | 1 | 0 | 0 | 0 | 115 | 78  | 58 | 6.7  | 6.7  | 6.7  | 108 | 9  | 0.66 | 201 | 82  | 66 | 129 | 5.6 | 1 |
| 1 | 78 | 24.7 | 92  | 1 | 1 | 1 | 1 | 0 | 0 | 135 | 86  | 54 | 9.7  | 9.3  | 9.5  | 90  | 18 | 1.01 | 183 | 92  | 48 | 122 | 5.2 | 1 |
| 1 | 53 | 22.9 | 87  | 1 | 2 | 2 | 1 | 0 | 1 | 136 | 94  | 56 | 7.6  | 7.7  | 7.65 | 97  | 18 | 0.89 | 239 | 150 | 69 | 160 | 5.4 | 0 |
| 1 | 57 | 28.8 | 93  | 1 | 1 | 1 | 1 | 0 | 0 | 140 | 80  | 75 | 7.1  | 6.9  | 7    | 86  | 14 | 0.85 | 167 | 60  | 73 | 94  | 5.6 | 1 |



|   |    |      |      |   |   |   |   |   |   |     |     |    |     |      |       |     |    |      |     |     |    |     |      |   |
|---|----|------|------|---|---|---|---|---|---|-----|-----|----|-----|------|-------|-----|----|------|-----|-----|----|-----|------|---|
| 1 | 45 | 22.1 | 78.5 | 2 | 1 | 1 | 0 | 0 | 0 | 107 | 65  | 43 | 7.5 | 7.6  | 7.55  | 95  | 16 | 0.89 | 153 | 59  | 67 | 90  | 5.3  | 0 |
| 1 | 47 | 29.0 | 98   | 2 | 1 | 2 | 1 | 0 | 1 | 131 | 86  | 72 | 6.7 | 6.3  | 6.5   | 95  | 8  | 0.8  | 148 | 143 | 66 | 72  | 5.8  | 0 |
| 1 | 60 | 26.0 | 90   | 1 | 2 | 2 | 1 | 0 | 1 | 140 | 83  | 46 | 8   | 8.1  | 8.05  | 105 | 16 | 1.09 | 260 | 53  | 87 | 180 | 5.5  | 0 |
| 1 | 48 | 26.1 | 89   | 2 | 1 | 1 | 1 | 1 | 1 | 120 | 85  | 80 | 9.1 | 8.6  | 8.85  | 294 | 14 | 0.77 | 312 | 329 | 32 | 234 | 11.5 | 1 |
| 2 | 53 | 26.1 | 82   | 1 | 1 | 1 | 1 | 0 | 1 | 134 | 95  | 71 | 7.4 | 7.7  | 7.55  | 103 | 14 | 0.64 | 248 | 82  | 78 | 173 | 5.8  | 0 |
| 1 | 55 | 24.5 | 88   | 1 | 1 | 1 | 0 | 0 | 1 | 131 | 85  | 82 | 7   | 7.1  | 7.05  | 105 | 12 | 0.91 | 233 | 100 | 60 | 168 | 5.4  | 1 |
| 1 | 42 | 25.2 | 87   | 2 | 2 | 1 | 0 | 0 | 0 | 122 | 83  | 51 | 6.2 | 6.4  | 6.3   | 94  | 18 | 0.94 | 213 | 71  | 65 | 154 | 5.7  | 0 |
| 1 | 61 | 31.9 | 99   | 2 | 1 | 2 | 1 | 0 | 1 | 126 | 77  | 65 | 6.2 | 5.8  | 6     | 108 | 12 | 0.94 | 277 | 173 | 54 | 182 | 5.4  | 0 |
| 1 | 62 | 25.7 | 87.5 | 1 | 1 | 1 | 1 | 0 | 0 | 154 | 105 | 52 | 8   | 7.1  | 7.55  | 101 | 18 | 0.95 | 192 | 77  | 61 | 131 | 5.4  | 1 |
| 1 | 57 | 29.4 | 99   | 1 | 1 | 2 | 0 | 0 | 0 | 134 | 84  | 57 | 7.3 | 6.6  | 6.95  | 97  | 15 | 0.96 | 169 | 81  | 69 | 93  | 5.5  | 1 |
| 2 | 57 | 20.9 | 77   | 1 | 1 | 1 | 0 | 0 | 0 | 121 | 79  | 49 | 8.3 | 7.8  | 8.05  | 87  | 14 | 0.59 | 238 | 79  | 64 | 151 | 5.4  | 0 |
| 1 | 62 | 24.4 | 88   | 2 | 1 | 2 | 1 | 0 | 1 | 144 | 93  | 65 | 9.4 | 9.7  | 9.55  | 113 | 19 | 0.91 | 207 | 231 | 54 | 115 | 5.5  | 1 |
| 1 | 62 | 23.0 | 90   | 2 | 2 | 2 | 1 | 0 | 0 | 142 | 93  | 70 | 8.8 | 8.8  | 8.8   | 100 | 18 | 0.99 | 210 | 74  | 57 | 138 | 5.2  | 1 |
| 2 | 60 | 24.0 | 87   | 1 | 1 | 2 | 1 | 0 | 1 | 134 | 89  | 61 | 9.6 | 9.2  | 9.4   | 91  | 9  | 0.65 | 234 | 110 | 56 | 160 | 5.5  | 1 |
| 1 | 59 | 24.1 | 92   | 1 | 1 | 1 | 1 | 1 | 0 | 126 | 87  | 64 | 8.2 | 8.1  | 8.15  | 129 | 12 | 1.22 | 210 | 95  | 62 | 148 | 6.5  | 1 |
| 1 | 49 | 23.7 | 83   | 1 | 1 | 1 | 0 | 0 | 1 | 126 | 78  | 58 | 6.9 | 7    | 6.95  | 109 | 16 | 0.89 | 227 | 172 | 53 | 166 | 5.8  | 0 |
| 1 | 54 | 22.7 | 83   | 2 | 2 | 1 | 1 | 1 | 1 | 129 | 91  | 70 | 6.9 | 7.1  | 7     | 128 | 18 | 0.92 | 289 | 97  | 69 | 216 | 5.9  | 0 |
| 1 | 55 | 26.4 | 87   | 1 | 2 | 2 | 0 | 1 | 1 | 129 | 89  | 51 | 8.9 | 8.3  | 8.6   | 140 | 14 | 1.18 | 206 | 158 | 38 | 144 | 5.8  | 0 |
| 1 | 41 | 29.0 | 103  | 2 | 1 | 1 | 1 | 0 | 1 | 148 | 98  | 63 | 7.6 | 7.8  | 7.7   | 105 | 14 | 0.93 | 184 | 243 | 41 | 123 | 5.5  | 1 |
| 2 | 54 | 21.5 | 78   | 1 | 1 | 2 | 0 | 0 | 0 | 121 | 75  | 55 | 7.2 | 7.2  | 7.2   | 95  | 12 | 0.66 | 202 | 53  | 56 | 142 | 5.4  | 1 |
| 1 | 64 | 22.5 | 80   | 2 | 2 | 1 | 0 | 0 | 0 | 126 | 79  | 67 | 9.6 | 15   | 12.3  | 95  | 13 | 0.71 | 208 | 62  | 63 | 144 | 5.6  | 0 |
| 1 | 60 | 26.3 | 96   | 2 | 1 | 1 | 1 | 0 | 1 | 140 | 97  | 82 | 9.3 | 14.4 | 11.85 | 109 | 17 | 0.97 | 276 | 207 | 51 | 205 | 5.8  | 0 |
| 1 | 63 | 23.2 | 88   | 2 | 1 | 1 | 1 | 1 | 1 | 144 | 90  | 67 | 9   | 8.8  | 8.9   | 272 | 11 | 0.9  | 106 | 152 | 31 | 64  | 12.9 | 0 |
| 1 | 52 | 26.8 | 89   | 1 | 1 | 2 | 0 | 0 | 0 | 126 | 88  | 53 | 6.6 | 6.8  | 6.7   | 106 | 14 | 1.05 | 199 | 157 | 47 | 138 | 5.7  | 1 |
| 1 | 54 | 23.2 | 82   | 1 | 1 | 1 | 0 | 1 | 1 | 127 | 83  | 64 | 7.5 | 7.4  | 7.45  | 135 | 11 | 0.99 | 160 | 84  | 63 | 97  | 6.6  | 1 |
| 2 | 58 | 23.0 | 87   | 1 | 1 | 1 | 0 | 0 | 0 | 125 | 88  | 78 | 8.7 | 9    | 8.85  | 111 | 12 | 0.69 | 167 | 129 | 49 | 105 | 5.4  | 0 |
| 1 | 51 | 29.0 | 95.5 | 2 | 2 | 2 | 1 | 0 | 0 | 141 | 98  | 73 | 4.7 | 5.1  | 4.9   | 113 | 11 | 0.86 | 185 | 159 | 40 | 136 | 5.6  | 0 |
| 1 | 56 | 24.1 | 84   | 2 | 2 | 1 | 0 | 0 | 0 | 113 | 78  | 69 | 6.7 | 7    | 6.85  | 101 | 10 | 0.66 | 157 | 149 | 44 | 97  | 6.4  | 0 |
| 1 | 48 | 23.5 | 86   | 1 | 1 | 2 | 1 | 0 | 0 | 145 | 94  | 59 | 6.9 | 7    | 6.95  | 94  | 17 | 0.91 | 182 | 42  | 73 | 115 | 5.4  | 1 |

|   |    |      |      |   |   |   |   |   |   |     |     |    |      |      |       |     |    |      |     |     |     |     |      |   |
|---|----|------|------|---|---|---|---|---|---|-----|-----|----|------|------|-------|-----|----|------|-----|-----|-----|-----|------|---|
| 1 | 52 | 24.5 | 92.5 | 1 | 1 | 2 | 0 | 0 | 1 | 125 | 78  | 77 | 7.1  | 7    | 7.05  | 106 | 13 | 0.96 | 166 | 93  | 45  | 119 | 5.1  | 1 |
| 2 | 46 | 28.9 | 95   | 1 | 1 | 1 | 1 | 0 | 0 | 124 | 92  | 81 | 7.8  | 7.5  | 7.65  | 102 | 11 | 0.61 | 216 | 132 | 56  | 156 | 5.9  | 1 |
| 2 | 49 | 25.2 | 82   | 1 | 1 | 1 | 0 | 1 | 1 | 116 | 77  | 69 | 7.8  | 7.5  | 7.65  | 110 | 10 | 0.57 | 229 | 84  | 56  | 174 | 6.6  | 1 |
| 1 | 69 | 26.6 | 86   | 2 | 1 | 1 | 1 | 0 | 1 | 162 | 105 | 82 | 8.4  | 7.8  | 8.1   | 110 | 11 | 1.02 | 159 | 217 | 29  | 102 | 4.7  | 1 |
| 2 | 47 | 19.2 | 69   | 1 | 1 | 1 | 0 | 0 | 0 | 127 | 82  | 55 | 7.4  | 7.5  | 7.45  | 91  | 11 | 0.72 | 169 | 83  | 109 | 62  | 5.3  | 0 |
| 1 | 35 | 26.8 | 93   | 2 | 1 | 1 | 1 | 0 | 1 | 131 | 97  | 77 | 6.9  | 6.9  | 6.9   | 115 | 13 | 1.02 | 222 | 241 | 41  | 159 | 5.7  | 1 |
| 1 | 59 | 27.3 | 97   | 1 | 1 | 1 | 1 | 1 | 1 | 145 | 93  | 63 | 7.7  | 7.7  | 7.7   | 129 | 20 | 1.3  | 118 | 101 | 41  | 62  | 7.9  | 1 |
| 1 | 52 | 30.1 | 104  | 1 | 1 | 1 | 1 | 0 | 1 | 143 | 99  | 95 | 6.7  | 6.7  | 6.7   | 111 | 13 | 0.94 | 144 | 82  | 58  | 90  | 5.8  | 0 |
| 1 | 54 | 24.3 | 88   | 2 | 2 | 1 | 0 | 0 | 0 | 106 | 75  | 63 | 9.2  | 9.1  | 9.15  | 96  | 16 | 1.01 | 195 | 58  | 71  | 128 | 5.6  | 0 |
| 1 | 54 | 23.2 | 81   | 2 | 2 | 1 | 1 | 0 | 0 | 149 | 108 | 90 | 9.3  | 10.4 | 9.85  | 113 | 15 | 0.68 | 216 | 86  | 66  | 152 | 5.4  | 1 |
| 1 | 58 | 24.1 | 83   | 1 | 1 | 1 | 0 | 0 | 0 | 129 | 80  | 63 | 7.3  | 7.6  | 7.45  | 102 | 19 | 0.85 | 159 | 74  | 40  | 114 | 5.6  | 1 |
| 1 | 47 | 25.1 | 80.5 | 2 | 1 | 2 | 1 | 0 | 1 | 142 | 89  | 72 | 6.8  | 6.7  | 6.75  | 104 | 15 | 0.94 | 183 | 171 | 38  | 134 | 5.7  | 1 |
| 1 | 56 | 22.6 | 84.5 | 2 | 1 | 1 | 1 | 1 | 1 | 137 | 96  | 62 | 7.2  | 6.7  | 6.95  | 104 | 13 | 0.85 | 218 | 198 | 66  | 137 | 6.8  | 1 |
| 2 | 41 | 21.0 | 75   | 1 | 2 | 1 | 1 | 0 | 0 | 133 | 91  | 96 | 5.5  | 5.7  | 5.6   | 96  | 8  | 0.54 | 163 | 37  | 79  | 87  | 4.9  | 1 |
| 1 | 54 | 26.8 | 93   | 2 | 2 | 1 | 1 | 0 | 1 | 134 | 96  | 62 | 7.6  | 7.6  | 7.6   | 95  | 18 | 1.16 | 187 | 369 | 36  | 106 | 5.4  | 0 |
| 2 | 57 | 22.4 | 77   | 1 | 1 | 1 | 1 | 1 | 1 | 146 | 98  | 69 | 8    | 7.1  | 7.55  | 158 | 9  | 0.57 | 221 | 165 | 53  | 150 | 10.3 | 0 |
| 1 | 49 | 26.1 | 93   | 1 | 2 | 1 | 1 | 0 | 0 | 138 | 102 | 64 | 6.2  | 6.3  | 6.25  | 114 | 14 | 1.11 | 173 | 124 | 45  | 120 | 5.7  | 1 |
| 1 | 54 | 25.6 | 91   | 1 | 1 | 1 | 1 | 1 | 1 | 146 | 108 | 79 | 8.7  | 9.2  | 8.95  | 152 | 13 | 1.01 | 179 | 170 | 42  | 118 | 6.7  | 0 |
| 1 | 58 | 22.4 | 83   | 2 | 1 | 2 | 0 | 0 | 1 | 121 | 79  | 57 | 7.3  | 7.3  | 7.3   | 79  | 14 | 0.9  | 214 | 163 | 32  | 162 | 5.5  | 1 |
| 1 | 59 | 25.2 | 87   | 1 | 2 | 2 | 0 | 0 | 0 | 116 | 83  | 63 | 7    | 7.3  | 7.15  | 95  | 16 | 0.95 | 203 | 53  | 47  | 152 | 5.1  | 1 |
| 1 | 61 | 24.7 | 86   | 1 | 2 | 1 | 0 | 1 | 1 | 136 | 79  | 47 | 7.6  | 7.7  | 7.65  | 107 | 22 | 1.29 | 196 | 76  | 85  | 114 | 6.5  | 1 |
| 2 | 50 | 20.2 | 69   | 1 | 1 | 2 | 0 | 0 | 1 | 121 | 82  | 90 | 6.9  | 7.4  | 7.15  | 88  | 13 | 0.72 | 253 | 51  | 70  | 182 | 6    | 0 |
| 2 | 56 | 19.2 | 67   | 1 | 1 | 1 | 0 | 0 | 1 | 124 | 78  | 63 | 7.2  | 7.5  | 7.35  | 105 | 13 | 0.74 | 247 | 61  | 68  | 174 | 5.9  | 1 |
| 1 | 52 | 22.8 | 79   | 2 | 1 | 1 | 0 | 0 | 0 | 136 | 83  | 57 | 6.8  | 7.2  | 7     | 100 | 14 | 0.91 | 189 | 140 | 64  | 115 | 5.4  | 0 |
| 1 | 59 | 21.7 | 79   | 1 | 1 | 2 | 0 | 0 | 1 | 124 | 69  | 54 | 7.9  | 7.9  | 7.9   | 92  | 43 | 1.05 | 153 | 74  | 25  | 113 | 5.1  | 1 |
| 1 | 47 | 25.2 | 85   | 1 | 1 | 1 | 1 | 0 | 1 | 140 | 81  | 66 | 7.2  | 7    | 7.1   | 97  | 14 | 1.06 | 147 | 108 | 34  | 99  | 5.4  | 0 |
| 2 | 74 | 22.3 | 78   | 1 | 1 | 1 | 1 | 1 | 1 | 143 | 73  | 69 | 10.5 | 10.8 | 10.65 | 131 | 22 | 0.87 | 168 | 246 | 48  | 90  | 7.5  | 1 |
| 2 | 64 | 24.0 | 82   | 1 | 1 | 1 | 0 | 0 | 0 | 113 | 66  | 59 | 6.7  | 6.8  | 6.75  | 82  | 17 | 0.73 | 158 | 127 | 73  | 72  | 5.6  | 0 |
| 2 | 45 | 20.8 | 78   | 1 | 1 | 1 | 1 | 0 | 1 | 128 | 90  | 67 | 7.2  | 7.2  | 7.2   | 94  | 12 | 0.62 | 283 | 48  | 64  | 215 | 5.5  | 0 |

|   |    |      |      |   |   |   |   |   |   |     |     |     |      |     |      |     |    |      |     |     |    |     |     |   |
|---|----|------|------|---|---|---|---|---|---|-----|-----|-----|------|-----|------|-----|----|------|-----|-----|----|-----|-----|---|
| 2 | 63 | 23.4 | 85   | 1 | 1 | 1 | 1 | 0 | 0 | 158 | 102 | 101 | 8.8  | 9.1 | 8.95 | 104 | 8  | 0.58 | 206 | 114 | 67 | 125 | 5.9 | 1 |
| 1 | 75 | 23.4 | 90   | 1 | 1 | 1 | 1 | 0 | 1 | 137 | 90  | 67  | 9.6  | 9.9 | 9.75 | 111 | 15 | 1.11 | 195 | 277 | 36 | 122 | 5.7 | 1 |
| 1 | 37 | 24.5 | 81   | 1 | 1 | 2 | 1 | 0 | 0 | 149 | 98  | 91  | 5.9  | 6.2 | 6.05 | 90  | 15 | 1.01 | 135 | 47  | 41 | 95  | 5.7 | 1 |
| 1 | 57 | 20.6 | 85   | 2 | 2 | 1 | 1 | 1 | 0 | 162 | 105 | 96  | 10.1 | 9.8 | 9.95 | 150 | 20 | 0.73 | 123 | 152 | 59 | 52  | 7.3 | 0 |
| 2 | 26 | 23.1 | 77   | 1 | 1 | 1 | 0 | 0 | 0 | 106 | 71  | 62  | 7    | 7.4 | 7.2  | 95  | 9  | 0.7  | 148 | 56  | 66 | 80  | 5.4 | 0 |
| 1 | 50 | 22.1 | 86   | 1 | 2 | 1 | 0 | 0 | 0 | 120 | 77  | 50  | 7.2  | 7.4 | 7.3  | 99  | 14 | 0.85 | 209 | 125 | 45 | 157 | 5.6 | 0 |
| 1 | 57 | 23.7 | 90   | 2 | 2 | 1 | 1 | 0 | 0 | 136 | 95  | 76  | 7.3  | 7.4 | 7.35 | 101 | 13 | 0.75 | 196 | 130 | 42 | 143 | 5.5 | 1 |
| 2 | 54 | 21.3 | 73   | 1 | 1 | 2 | 0 | 0 | 0 | 138 | 78  | 56  | 6.7  | 7   | 6.85 | 89  | 12 | 0.7  | 207 | 98  | 69 | 134 | 5.4 | 1 |
| 2 | 50 | 22.1 | 79   | 1 | 1 | 1 | 0 | 0 | 0 | 122 | 76  | 52  | 7    | 7.1 | 7.05 | 89  | 10 | 0.62 | 203 | 130 | 65 | 127 | 5.4 | 1 |
| 1 | 55 | 21.7 | 81   | 2 | 1 | 1 | 1 | 0 | 1 | 142 | 101 | 61  | 7.8  | 7.7 | 7.75 | 100 | 13 | 0.92 | 235 | 241 | 37 | 153 | 5.8 | 0 |
| 1 | 51 | 21.6 | 84   | 2 | 1 | 1 | 0 | 0 | 1 | 114 | 80  | 57  | 7.6  | 7.7 | 7.65 | 103 | 19 | 1.12 | 251 | 123 | 40 | 200 | 5.5 | 0 |
| 2 | 54 | 26.6 | 88   | 1 | 1 | 1 | 1 | 0 | 1 | 140 | 88  | 70  | 7.8  | 7.6 | 7.7  | 104 | 13 | 0.78 | 227 | 172 | 41 | 169 | 5.4 | 0 |
| 1 | 46 | 21.7 | 82   | 2 | 2 | 2 | 1 | 0 | 1 | 154 | 108 | 67  | 7.2  | 7.3 | 7.25 | 87  | 13 | 0.94 | 257 | 191 | 65 | 172 | 5.3 | 1 |
| 1 | 63 | 25.1 | 94   | 2 | 1 | 1 | 1 | 0 | 1 | 143 | 101 | 72  | 8.9  | 9.7 | 9.3  | 109 | 14 | 1.25 | 227 | 130 | 58 | 164 | 5.8 | 1 |
| 1 | 53 | 34.4 | 112  | 1 | 1 | 1 | 1 | 1 | 1 | 150 | 86  | 50  | 8.3  | 8.2 | 8.25 | 234 | 12 | 0.9  | 164 | 106 | 37 | 106 | 8.8 | 1 |
| 2 | 53 | 37.4 | 104  | 1 | 1 | 1 | 0 | 0 | 1 | 131 | 86  | 69  | 6    | 5.5 | 5.75 | 93  | 16 | 0.76 | 243 | 132 | 48 | 174 | 5.7 | 1 |
| 2 | 59 | 22.4 | 79   | 1 | 1 | 2 | 0 | 0 | 0 | 117 | 72  | 54  | 7.6  | 7.9 | 7.75 | 99  | 15 | 0.74 | 146 | 52  | 50 | 92  | 5.4 | 0 |
| 1 | 58 | 32.6 | 107  | 1 | 1 | 1 | 1 | 1 | 0 | 138 | 98  | 82  | 7.8  | 8   | 7.9  | 126 | 8  | 0.8  | 137 | 58  | 63 | 67  | 6.5 | 0 |
| 1 | 54 | 21.2 | 78   | 1 | 1 | 1 | 0 | 0 | 0 | 113 | 71  | 62  | 7.1  | 7.3 | 7.2  | 100 | 11 | 0.91 | 205 | 36  | 80 | 130 | 5.6 | 1 |
| 1 | 46 | 23.7 | 83   | 1 | 2 | 2 | 1 | 0 | 1 | 125 | 97  | 65  | 7.1  | 6.9 | 7    | 91  | 13 | 0.91 | 251 | 180 | 76 | 154 | 5.4 | 0 |
| 1 | 45 | 26.1 | 84.5 | 2 | 1 | 1 | 1 | 0 | 1 | 149 | 98  | 59  | 7.7  | 7.3 | 7.5  | 101 | 17 | 0.86 | 208 | 136 | 32 | 164 | 6.1 | 0 |
| 2 | 41 | 25.4 | 93   | 1 | 1 | 1 | 0 | 0 | 0 | 121 | 84  | 71  | 6.7  | 6.7 | 6.7  | 88  | 9  | 0.62 | 229 | 126 | 80 | 139 | 5.2 | 1 |
| 1 | 40 | 35.3 | 110  | 1 | 2 | 1 | 1 | 0 | 0 | 150 | 100 | 86  | 5.9  | 6   | 5.95 | 104 | 12 | 1.01 | 207 | 137 | 78 | 116 | 5.5 | 0 |
| 1 | 54 | 25.2 | 87   | 2 | 1 | 1 | 1 | 0 | 1 | 132 | 91  | 75  | 7.6  | 7.8 | 7.7  | 100 | 19 | 1.18 | 228 | 246 | 38 | 113 | 6.1 | 0 |
| 1 | 39 | 25.7 | 92   | 2 | 2 | 1 | 1 | 0 | 1 | 142 | 87  | 57  | 7.5  | 7.5 | 7.5  | 100 | 12 | 1    | 273 | 165 | 58 | 135 | 5.3 | 1 |
| 1 | 63 | 21.6 | 79   | 1 | 1 | 1 | 1 | 0 | 0 | 147 | 102 | 70  | 8    | 7.7 | 7.85 | 99  | 12 | 0.92 | 194 | 60  | 49 | 129 | 4.8 | 1 |
| 2 | 56 | 23.7 | 79   | 1 | 1 | 1 | 0 | 0 | 0 | 138 | 84  | 68  | 7.6  | 7.6 | 7.6  | 84  | 11 | 0.68 | 201 | 102 | 74 | 105 | 6.1 | 0 |
| 1 | 60 | 24.7 | 87   | 2 | 1 | 1 | 1 | 1 | 0 | 148 | 101 | 60  | 9.3  | 9.5 | 9.4  | 113 | 17 | 1    | 209 | 174 | 42 | 146 | 6.2 | 0 |
| 1 | 68 | 24.5 | 94   | 1 | 1 | 1 | 1 | 1 | 1 | 122 | 82  | 63  | 8    | 8   | 8    | 126 | 13 | 0.8  | 127 | 64  | 54 | 70  | 6.9 | 1 |

|   |    |      |      |   |   |   |   |   |   |     |     |     |      |      |       |     |    |      |     |     |     |     |      |   |
|---|----|------|------|---|---|---|---|---|---|-----|-----|-----|------|------|-------|-----|----|------|-----|-----|-----|-----|------|---|
| 2 | 57 | 21.1 | 79   | 1 | 2 | 1 | 1 | 0 | 1 | 140 | 81  | 52  | 7.2  | 7.5  | 7.35  | 93  | 11 | 0.78 | 197 | 42  | 90  | 102 | 5.7  | 0 |
| 2 | 56 | 19.5 | 72   | 1 | 1 | 1 | 0 | 0 | 1 | 121 | 86  | 66  | 7.4  | 7.4  | 7.4   | 98  | 14 | 0.67 | 237 | 132 | 51  | 160 | 5.7  | 1 |
| 1 | 72 | 20.7 | 82   | 2 | 1 | 1 | 0 | 0 | 1 | 139 | 85  | 62  | 9.2  | 9.4  | 9.3   | 89  | 21 | 1.13 | 260 | 184 | 64  | 163 | 6.1  | 0 |
| 2 | 40 | 18.4 | 65   | 1 | 1 | 1 | 0 | 0 | 0 | 119 | 80  | 67  | 7.4  | 7.6  | 7.5   | 94  | 11 | 0.56 | 163 | 70  | 54  | 103 | 5.4  | 0 |
| 1 | 65 | 26.2 | 97   | 2 | 2 | 1 | 1 | 0 | 1 | 144 | 86  | 55  | 9.5  | 9.3  | 9.4   | 90  | 12 | 1.02 | 125 | 103 | 45  | 61  | 5.9  | 1 |
| 1 | 50 | 24.8 | 87   | 1 | 1 | 1 | 0 | 1 | 1 | 127 | 87  | 101 | 7.1  | 7.1  | 7.1   | 170 | 9  | 0.69 | 143 | 144 | 58  | 73  | 10.1 | 0 |
| 1 | 43 | 26.2 | 90   | 2 | 1 | 1 | 1 | 0 | 1 | 131 | 90  | 51  | 6.8  | 6.5  | 6.65  | 86  | 10 | 0.96 | 204 | 152 | 37  | 140 | 5.4  | 1 |
| 2 | 83 | 22.1 | 79   | 1 | 1 | 1 | 0 | 1 | 1 | 138 | 86  | 71  | 11.7 | 11.4 | 11.55 | 134 | 6  | 0.62 | 196 | 383 | 45  | 106 | 7.6  | 0 |
| 1 | 47 | 23.2 | 88   | 2 | 1 | 1 | 0 | 0 | 1 | 112 | 81  | 66  | 7.1  | 7    | 7.05  | 83  | 16 | 1.21 | 235 | 62  | 51  | 167 | 5.6  | 1 |
| 2 | 60 | 26.3 | 92   | 1 | 1 | 1 | 1 | 0 | 0 | 140 | 80  | 85  | 7.9  | 8.2  | 8.05  | 106 | 10 | 0.66 | 221 | 62  | 77  | 133 | 5.4  | 1 |
| 2 | 49 | 18.9 | 72   | 1 | 1 | 1 | 0 | 0 | 0 | 117 | 72  | 67  | 7.2  | 7.3  | 7.25  | 103 | 17 | 0.8  | 199 | 99  | 70  | 116 | 5.2  | 0 |
| 1 | 65 | 26.5 | 91   | 2 | 2 | 1 | 1 | 0 | 1 | 143 | 89  | 55  | 8.6  | 9    | 8.8   | 111 | 16 | 0.96 | 205 | 210 | 37  | 133 | 5.7  | 1 |
| 2 | 61 | 19.4 | 76   | 1 | 1 | 1 | 1 | 0 | 0 | 150 | 96  | 74  | 7.8  | 8.5  | 8.15  | 92  | 20 | 0.88 | 173 | 25  | 59  | 113 | 5.7  | 1 |
| 1 | 43 | 25.0 | 90   | 2 | 1 | 1 | 1 | 1 | 1 | 148 | 102 | 85  | 7.2  | 7.3  | 7.25  | 136 | 8  | 0.91 | 157 | 136 | 27  | 89  | 5    | 0 |
| 1 | 46 | 23.5 | 85   | 1 | 1 | 2 | 1 | 0 | 0 | 150 | 95  | 45  | 7.4  | 7.3  | 7.35  | 93  | 13 | 0.91 | 180 | 137 | 57  | 102 | 5.3  | 1 |
| 2 | 40 | 23.7 | 80   | 2 | 1 | 1 | 0 | 0 | 0 | 111 | 67  | 75  | 5.1  | 5.1  | 5.1   | 82  | 14 | 0.62 | 156 | 42  | 64  | 103 | 5.1  | 1 |
| 1 | 55 | 27.8 | 102  | 1 | 2 | 2 | 1 | 0 | 0 | 146 | 94  | 66  | 9.2  | 9.7  | 9.45  | 98  | 12 | 1.14 | 215 | 147 | 49  | 131 | 5.4  | 1 |
| 1 | 49 | 23.8 | 90   | 1 | 1 | 2 | 0 | 1 | 0 | 130 | 84  | 66  | 7.9  | 7.9  | 7.9   | 144 | 14 | 0.7  | 161 | 142 | 46  | 97  | 7.5  | 1 |
| 2 | 46 | 18.4 | 69   | 1 | 1 | 1 | 0 | 0 | 1 | 114 | 72  | 73  | 6.9  | 7.3  | 7.1   | 88  | 12 | 0.65 | 243 | 67  | 112 | 102 | 5.3  | 0 |
| 1 | 46 | 26.3 | 91   | 1 | 1 | 1 | 1 | 0 | 1 | 143 | 87  | 62  | 7    | 7    | 7     | 87  | 15 | 1.04 | 202 | 73  | 35  | 155 | 5.3  | 0 |
| 1 | 43 | 20.5 | 76   | 1 | 1 | 2 | 0 | 0 | 0 | 118 | 78  | 52  | 6.8  | 6.8  | 6.8   | 85  | 11 | 0.9  | 239 | 39  | 92  | 136 | 5    | 0 |
| 1 | 48 | 27.0 | 96   | 1 | 1 | 1 | 1 | 1 | 1 | 165 | 70  | 76  | 7    | 6.9  | 6.95  | 145 | 13 | 0.84 | 176 | 228 | 63  | 78  | 6.5  | 1 |
| 2 | 59 | 19.7 | 70   | 2 | 1 | 1 | 0 | 0 | 0 | 105 | 73  | 65  | 7.1  | 7.1  | 7.1   | 90  | 14 | 0.67 | 170 | 69  | 67  | 89  | 5.8  | 1 |
| 1 | 56 | 36.9 | 120  | 2 | 1 | 1 | 1 | 0 | 1 | 132 | 91  | 63  | 7.1  | 7.5  | 7.3   | 106 | 17 | 0.89 | 201 | 126 | 27  | 152 | 6.3  | 1 |
| 2 | 58 | 26.2 | 83   | 1 | 1 | 2 | 1 | 0 | 0 | 132 | 95  | 74  | 8.1  | 7.7  | 7.9   | 96  | 16 | 0.84 | 217 | 63  | 76  | 122 | 5.8  | 1 |
| 2 | 79 | 28.9 | 95   | 1 | 1 | 1 | 1 | 0 | 0 | 148 | 100 | 60  | 9.7  | 8.8  | 9.25  | 117 | 17 | 0.7  | 235 | 138 | 58  | 144 | 6.4  | 1 |
| 2 | 56 | 25.0 | 82   | 1 | 1 | 1 | 1 | 0 | 1 | 156 | 95  | 70  | 8.5  | 8.8  | 8.65  | 101 | 14 | 0.76 | 225 | 71  | 61  | 150 | 5.9  | 1 |
| 2 | 38 | 23.2 | 78.5 | 1 | 1 | 1 | 0 | 0 | 0 | 108 | 68  | 87  | 6    | 6.1  | 6.05  | 88  | 11 | 0.6  | 195 | 34  | 46  | 139 | 5.3  | 0 |
| 1 | 48 | 32.7 | 111  | 2 | 1 | 1 | 1 | 0 | 1 | 140 | 103 | 69  | 6.8  | 6.9  | 6.85  | 95  | 19 | 0.97 | 154 | 330 | 35  | 76  | 5.5  | 0 |

|   |    |      |     |   |   |   |   |   |   |     |     |    |      |      |       |     |    |      |     |     |     |     |     |   |
|---|----|------|-----|---|---|---|---|---|---|-----|-----|----|------|------|-------|-----|----|------|-----|-----|-----|-----|-----|---|
| 1 | 60 | 22.9 | 81  | 1 | 1 | 2 | 0 | 0 | 0 | 112 | 77  | 58 | 8    | 7.9  | 7.95  | 86  | 15 | 0.98 | 160 | 40  | 40  | 125 | 5.4 | 1 |
| 1 | 50 | 32.6 | 104 | 1 | 2 | 1 | 1 | 1 | 0 | 166 | 114 | 64 | 7.8  | 7.4  | 7.6   | 126 | 16 | 0.84 | 187 | 112 | 54  | 116 | 6.1 | 0 |
| 2 | 55 | 21.1 | 79  | 1 | 1 | 1 | 0 | 0 | 0 | 113 | 69  | 73 | 7.9  | 7.8  | 7.85  | 100 | 14 | 0.69 | 176 | 127 | 65  | 85  | 5.7 | 0 |
| 2 | 47 | 18.7 | 74  | 1 | 1 | 1 | 0 | 0 | 0 | 119 | 71  | 67 | 7.3  | 7.5  | 7.4   | 98  | 10 | 0.67 | 210 | 67  | 64  | 133 | 5.3 | 1 |
| 1 | 55 | 22.6 | 82  | 1 | 2 | 1 | 1 | 0 | 1 | 136 | 89  | 74 | 7.6  | 7.5  | 7.55  | 92  | 9  | 0.72 | 161 | 122 | 54  | 95  | 5.5 | 1 |
| 2 | 58 | 20.8 | 78  | 2 | 1 | 1 | 0 | 0 | 1 | 103 | 66  | 70 | 7.1  | 7.1  | 7.1   | 96  | 14 | 0.71 | 256 | 148 | 69  | 139 | 5.4 | 1 |
| 1 | 72 | 24.2 | 92  | 2 | 1 | 1 | 1 | 0 | 0 | 147 | 104 | 63 | 10.4 | 10.7 | 10.55 | 89  | 13 | 0.99 | 205 | 146 | 42  | 124 | 5.3 | 1 |
| 1 | 62 | 32.0 | 110 | 1 | 1 | 1 | 1 | 0 | 0 | 145 | 99  | 76 | 9.1  | 8.9  | 9     | 99  | 12 | 0.94 | 206 | 66  | 48  | 155 | 5.4 | 1 |
| 1 | 71 | 23.4 | 88  | 1 | 1 | 1 | 1 | 0 | 1 | 143 | 90  | 55 | 9.2  | 9.1  | 9.15  | 97  | 13 | 0.83 | 146 | 81  | 66  | 65  | 5.4 | 1 |
| 2 | 48 | 24.1 | 79  | 1 | 1 | 1 | 0 | 0 | 1 | 118 | 80  | 58 | 6.1  | 6.2  | 6.15  | 90  | 13 | 0.71 | 299 | 106 | 79  | 180 | 5.3 | 0 |
| 1 | 59 | 23.3 | 92  | 2 | 1 | 1 | 0 | 0 | 0 | 136 | 85  | 97 | 7.4  | 7.9  | 7.65  | 86  | 18 | 0.98 | 237 | 48  | 48  | 115 | 5.6 | 1 |
| 1 | 43 | 28.2 | 94  | 2 | 1 | 1 | 1 | 0 | 1 | 159 | 95  | 76 | 8.1  | 8.1  | 8.1   | 107 | 15 | 0.88 | 197 | 519 | 38  | 92  | 5.5 | 1 |
| 1 | 65 | 26.3 | 92  | 1 | 1 | 1 | 1 | 1 | 1 | 106 | 75  | 65 | 7.9  | 8    | 7.95  | 150 | 17 | 1.12 | 184 | 134 | 38  | 120 | 6.7 | 1 |
| 2 | 51 | 20.8 | 70  | 1 | 1 | 1 | 0 | 0 | 0 | 113 | 70  | 57 | 7.9  | 8.3  | 8.1   | 87  | 11 | 0.71 | 217 | 70  | 61  | 144 | 5   | 1 |
| 1 | 58 | 26.7 | 94  | 2 | 2 | 1 | 1 | 0 | 0 | 150 | 96  | 75 | 9.3  | 9.5  | 9.4   | 103 | 12 | 0.92 | 183 | 69  | 50  | 115 | 5.7 | 1 |
| 1 | 67 | 23.9 | 90  | 2 | 1 | 1 | 1 | 1 | 0 | 139 | 92  | 84 | 10.2 | 10.2 | 10.2  | 186 | 20 | 1.34 | 138 | 46  | 65  | 72  | 6.9 | 0 |
| 1 | 62 | 21.8 | 80  | 2 | 1 | 1 | 1 | 0 | 1 | 156 | 106 | 63 | 8.6  | 8.9  | 8.75  | 99  | 12 | 0.97 | 179 | 135 | 44  | 118 | 5.4 | 0 |
| 2 | 59 | 19.5 | 69  | 1 | 1 | 1 | 1 | 1 | 0 | 123 | 78  | 66 | 7.8  | 7.7  | 7.75  | 99  | 13 | 0.77 | 203 | 105 | 59  | 123 | 5.4 | 1 |
| 2 | 56 | 21.5 | 70  | 1 | 1 | 1 | 0 | 0 | 1 | 129 | 81  | 70 | 6.7  | 6.7  | 6.7   | 113 | 10 | 0.65 | 253 | 43  | 106 | 130 | 5.6 | 1 |
| 1 | 61 | 23.2 | 88  | 2 | 1 | 1 | 0 | 1 | 1 | 130 | 82  | 50 | 8.1  | 8.4  | 8.25  | 137 | 16 | 0.93 | 130 | 122 | 39  | 70  | 6.8 | 0 |
| 1 | 58 | 25.5 | 98  | 2 | 1 | 1 | 0 | 1 | 1 | 123 | 82  | 75 | 8.5  | 8.3  | 8.4   | 213 | 15 | 1.05 | 190 | 212 | 50  | 109 | 9.4 | 1 |
| 1 | 63 | 31.6 | 107 | 1 | 1 | 1 | 0 | 1 | 0 | 127 | 86  | 75 | 6.4  | 6.3  | 6.35  | 116 | 12 | 0.97 | 178 | 114 | 47  | 117 | 6.5 | 0 |
| 1 | 58 | 22.6 | 86  | 1 | 1 | 1 | 1 | 0 | 0 | 130 | 91  | 63 | 7.4  | 7.4  | 7.4   | 89  | 14 | 1.02 | 205 | 47  | 73  | 129 | 5.2 | 1 |
| 1 | 75 | 22.4 | 85  | 1 | 1 | 2 | 1 | 1 | 1 | 146 | 80  | 66 | 9.7  | 9.7  | 9.7   | 202 | 18 | 0.9  | 109 | 56  | 34  | 71  | 7.6 | 1 |
| 2 | 56 | 31.6 | 98  | 1 | 1 | 1 | 1 | 0 | 0 | 143 | 98  | 66 | 8.2  | 8.3  | 8.25  | 77  | 17 | 0.51 | 198 | 196 | 50  | 123 | 6   | 1 |
| 1 | 39 | 20.9 | 79  | 2 | 1 | 1 | 1 | 0 | 0 | 140 | 86  | 62 | 6.8  | 6.9  | 6.85  | 96  | 12 | 0.98 | 209 | 92  | 110 | 93  | 5.1 | 0 |
| 1 | 41 | 18.9 | 75  | 2 | 2 | 1 | 1 | 0 | 0 | 138 | 91  | 83 | 6.8  | 6.7  | 6.75  | 107 | 8  | 0.89 | 208 | 159 | 90  | 108 | 5.4 | 0 |
| 2 | 65 | 23.1 | 80  | 1 | 1 | 1 | 1 | 0 | 1 | 140 | 89  | 70 | 8.1  | 8.7  | 8.4   | 94  | 20 | 0.72 | 244 | 87  | 61  | 160 | 5.4 | 1 |
| 2 | 74 | 21.2 | 80  | 1 | 1 | 1 | 1 | 0 | 1 | 156 | 94  | 46 | 9.3  | 9.4  | 9.35  | 89  | 18 | 0.51 | 218 | 81  | 73  | 128 | 5.7 | 1 |

|   |    |      |    |   |   |   |   |   |   |     |     |    |     |     |      |     |    |      |     |     |    |     |      |   |
|---|----|------|----|---|---|---|---|---|---|-----|-----|----|-----|-----|------|-----|----|------|-----|-----|----|-----|------|---|
| 1 | 54 | 20.0 | 74 | 1 | 2 | 2 | 1 | 0 | 0 | 131 | 94  | 56 | 7.5 | 7.6 | 7.55 | 98  | 19 | 0.98 | 161 | 63  | 43 | 111 | 5    | 0 |
| 1 | 64 | 26.7 | 92 | 1 | 2 | 2 | 1 | 0 | 0 | 143 | 98  | 59 | 7.1 | 7.5 | 7.3  | 90  | 16 | 0.89 | 205 | 75  | 75 | 115 | 5.4  | 1 |
| 2 | 53 | 23.7 | 88 | 1 | 1 | 1 | 0 | 0 | 1 | 107 | 70  | 67 | 8   | 8.2 | 8.1  | 92  | 12 | 0.73 | 276 | 531 | 39 | 93  | 5.8  | 0 |
| 1 | 59 | 24.8 | 91 | 1 | 2 | 1 | 1 | 1 | 0 | 140 | 92  | 70 | 7.6 | 7.6 | 7.6  | 130 | 17 | 0.77 | 207 | 32  | 68 | 131 | 5.4  | 1 |
| 1 | 51 | 24.6 | 83 | 1 | 1 | 2 | 0 | 0 | 0 | 129 | 83  | 53 | 7.1 | 7.2 | 7.15 | 94  | 13 | 0.81 | 177 | 65  | 51 | 108 | 5.3  | 1 |
| 1 | 57 | 21.6 | 84 | 1 | 2 | 1 | 1 | 0 | 1 | 125 | 87  | 83 | 7   | 7.1 | 7.05 | 92  | 12 | 0.93 | 191 | 37  | 56 | 135 | 4.7  | 1 |
| 2 | 60 | 23.0 | 82 | 1 | 1 | 1 | 1 | 0 | 0 | 124 | 79  | 65 | 7.9 | 8.3 | 8.1  | 92  | 16 | 0.75 | 239 | 28  | 82 | 151 | 5.6  | 0 |
| 1 | 63 | 21.9 | 76 | 1 | 1 | 1 | 0 | 0 | 0 | 124 | 82  | 76 | 7.8 | 8.1 | 7.95 | 108 | 14 | 0.96 | 218 | 93  | 58 | 139 | 5.8  | 1 |
| 1 | 55 | 24.5 | 92 | 2 | 2 | 1 | 1 | 0 | 1 | 142 | 100 | 54 | 6.1 | 6   | 6.05 | 107 | 15 | 1.18 | 233 | 164 | 49 | 168 | 5.7  | 0 |
| 2 | 61 | 20.4 | 80 | 1 | 1 | 1 | 0 | 0 | 1 | 127 | 81  | 72 | 8.9 | 8.6 | 8.75 | 92  | 12 | 0.73 | 246 | 130 | 54 | 156 | 5.4  | 1 |
| 1 | 41 | 25.0 | 91 | 2 | 2 | 1 | 0 | 0 | 1 | 131 | 87  | 50 | 7.4 | 7.5 | 7.45 | 113 | 12 | 0.75 | 180 | 236 | 48 | 99  | 5.2  | 0 |
| 2 | 69 | 21.3 | 83 | 1 | 1 | 1 | 0 | 0 | 0 | 109 | 77  | 65 | 8.6 | 8.6 | 8.6  | 104 | 13 | 0.84 | 184 | 49  | 63 | 108 | 5.4  | 0 |
| 1 | 47 | 26.8 | 95 | 2 | 1 | 1 | 1 | 1 | 1 | 113 | 79  | 66 | 7.4 | 7.6 | 7.5  | 60  | 24 | 1.32 | 163 | 153 | 46 | 92  | 6.8  | 0 |
| 1 | 58 | 21.5 | 79 | 1 | 1 | 1 | 0 | 0 | 0 | 121 | 78  | 72 | 6.7 | 6.9 | 6.8  | 72  | 14 | 0.7  | 195 | 48  | 47 | 133 | 5.6  | 1 |
| 2 | 57 | 22.0 | 79 | 1 | 1 | 1 | 0 | 1 | 0 | 125 | 81  | 67 | 7.1 | 7.3 | 7.2  | 239 | 13 | 0.56 | 199 | 122 | 43 | 151 | 6.8  | 0 |
| 1 | 56 | 25.0 | 88 | 1 | 2 | 1 | 1 | 0 | 1 | 144 | 92  | 78 | 6.9 | 6.9 | 6.9  | 98  | 13 | 1.01 | 240 | 71  | 67 | 144 | 5.4  | 1 |
| 2 | 62 | 28.8 | 92 | 1 | 1 | 1 | 1 | 1 | 1 | 113 | 79  | 71 | 7.8 | 7.5 | 7.65 | 124 | 14 | 0.77 | 259 | 116 | 44 | 196 | 6.5  | 0 |
| 1 | 60 | 23.9 | 90 | 2 | 2 | 1 | 1 | 1 | 1 | 138 | 93  | 67 | 9   | 9.1 | 9.05 | 170 | 17 | 0.92 | 213 | 187 | 35 | 144 | 7.7  | 1 |
| 1 | 51 | 27.9 | 95 | 1 | 1 | 1 | 1 | 1 | 1 | 126 | 84  | 58 | 6.9 | 6.7 | 6.8  | 139 | 13 | 0.99 | 229 | 166 | 44 | 157 | 6.5  | 1 |
| 1 | 44 | 18.3 | 75 | 2 | 1 | 1 | 0 | 0 | 0 | 90  | 60  | 56 | 8.1 | 8.5 | 8.3  | 88  | 12 | 1.09 | 149 | 43  | 64 | 72  | 5.3  | 0 |
| 1 | 53 | 26.6 | 81 | 2 | 1 | 1 | 0 | 0 | 1 | 132 | 88  | 70 | 7.1 | 7   | 7.05 | 99  | 17 | 0.88 | 230 | 53  | 68 | 176 | 5.4  | 1 |
| 1 | 53 | 25.0 | 93 | 1 | 2 | 2 | 1 | 0 | 0 | 141 | 102 | 56 | 8.1 | 7.1 | 7.6  | 92  | 15 | 1.04 | 215 | 96  | 56 | 126 | 5.5  | 1 |
| 2 | 47 | 23.2 | 81 | 1 | 1 | 1 | 0 | 0 | 0 | 116 | 60  | 56 | 6.9 | 6.8 | 6.85 | 96  | 15 | 0.67 | 183 | 70  | 59 | 103 | 5.4  | 0 |
| 2 | 72 | 22.8 | 86 | 1 | 1 | 1 | 1 | 1 | 1 | 138 | 90  | 64 | 8.5 | 8   | 8.25 | 173 | 12 | 0.61 | 186 | 119 | 48 | 111 | 10.7 | 1 |
| 1 | 68 | 23.9 | 87 | 1 | 1 | 1 | 0 | 0 | 1 | 126 | 71  | 60 | 7.7 | 7.9 | 7.8  | 124 | 15 | 0.9  | 239 | 100 | 51 | 169 | 5.8  | 1 |
| 1 | 66 | 24.9 | 94 | 1 | 1 | 1 | 1 | 1 | 0 | 146 | 89  | 53 | 8.4 | 8.7 | 8.55 | 144 | 10 | 0.8  | 237 | 137 | 51 | 111 | 6.7  | 0 |
| 2 | 54 | 22.9 | 80 | 1 | 1 | 2 | 1 | 0 | 0 | 138 | 101 | 59 | 8.8 | 8.8 | 8.8  | 92  | 11 | 0.84 | 197 | 126 | 64 | 111 | 5.5  | 1 |
| 2 | 70 | 21.6 | 84 | 1 | 1 | 1 | 1 | 0 | 0 | 147 | 89  | 65 | 8.3 | 8.3 | 8.3  | 96  | 18 | 0.67 | 186 | 96  | 54 | 104 | 5.6  | 1 |
| 1 | 49 | 20.5 | 75 | 1 | 1 | 1 | 0 | 0 | 1 | 114 | 69  | 60 | 7.1 | 7.2 | 7.15 | 95  | 8  | 0.8  | 266 | 99  | 91 | 147 | 5.7  | 1 |

|   |    |      |     |   |   |   |   |   |   |     |     |     |      |      |       |     |    |      |     |     |    |     |     |   |
|---|----|------|-----|---|---|---|---|---|---|-----|-----|-----|------|------|-------|-----|----|------|-----|-----|----|-----|-----|---|
| 1 | 46 | 23.2 | 89  | 1 | 2 | 1 | 1 | 0 | 1 | 138 | 92  | 59  | 7    | 7.3  | 7.15  | 105 | 10 | 0.96 | 253 | 187 | 44 | 175 | 5.4 | 0 |
| 1 | 49 | 28.0 | 97  | 1 | 2 | 1 | 1 | 0 | 1 | 130 | 85  | 70  | 6.6  | 6.7  | 6.65  | 107 | 10 | 0.76 | 140 | 112 | 46 | 84  | 5.6 | 1 |
| 1 | 58 | 26.1 | 95  | 1 | 2 | 2 | 1 | 0 | 1 | 136 | 92  | 79  | 8.4  | 8.1  | 8.25  | 111 | 13 | 0.97 | 173 | 105 | 57 | 105 | 5.4 | 1 |
| 1 | 60 | 26.3 | 94  | 1 | 1 | 1 | 1 | 1 | 0 | 156 | 103 | 65  | 8.1  | 7.2  | 7.65  | 118 | 12 | 0.96 | 216 | 86  | 44 | 152 | 6.5 | 0 |
| 2 | 61 | 21.8 | 79  | 1 | 1 | 1 | 0 | 0 | 0 | 131 | 89  | 60  | 9.4  | 8.4  | 8.9   | 86  | 13 | 0.7  | 230 | 167 | 76 | 127 | 6   | 1 |
| 1 | 62 | 24.4 | 86  | 2 | 1 | 2 | 1 | 0 | 0 | 148 | 100 | 57  | 9.4  | 8.1  | 8.75  | 94  | 12 | 1.01 | 224 | 187 | 56 | 121 | 5.3 | 1 |
| 1 | 56 | 23.6 | 91  | 1 | 1 | 1 | 0 | 0 | 0 | 110 | 74  | 60  | 6.8  | 6.9  | 6.85  | 93  | 14 | 0.97 | 196 | 125 | 52 | 114 | 5.4 | 0 |
| 2 | 48 | 29.3 | 99  | 1 | 1 | 1 | 0 | 0 | 0 | 120 | 70  | 69  | 5.1  | 5    | 5.05  | 95  | 7  | 0.56 | 159 | 60  | 55 | 96  | 5.9 | 1 |
| 1 | 47 | 26.8 | 93  | 2 | 2 | 1 | 1 | 0 | 1 | 150 | 95  | 58  | 7    | 6.5  | 6.75  | 105 | 15 | 0.92 | 174 | 218 | 40 | 59  | 5.4 | 1 |
| 1 | 65 | 24.4 | 88  | 2 | 1 | 1 | 1 | 0 | 0 | 154 | 95  | 53  | 8.5  | 7.5  | 8     | 111 | 15 | 1    | 205 | 163 | 41 | 133 | 5.7 | 1 |
| 1 | 47 | 22.9 | 83  | 2 | 2 | 1 | 1 | 0 | 1 | 127 | 86  | 58  | 6.4  | 6.6  | 6.5   | 114 | 11 | 0.82 | 177 | 83  | 66 | 102 | 5.8 | 1 |
| 1 | 47 | 25.6 | 88  | 2 | 2 | 1 | 1 | 0 | 1 | 130 | 87  | 72  | 6.5  | 6.3  | 6.4   | 110 | 12 | 1.12 | 167 | 261 | 68 | 66  | 5.4 | 1 |
| 1 | 53 | 20.8 | 73  | 2 | 1 | 1 | 1 | 0 | 0 | 133 | 98  | 68  | 8    | 8.1  | 8.05  | 101 | 12 | 0.95 | 192 | 60  | 71 | 99  | 5.3 | 0 |
| 2 | 65 | 20.2 | 75  | 1 | 1 | 1 | 1 | 0 | 0 | 160 | 96  | 70  | 9    | 8.9  | 8.95  | 109 | 13 | 0.63 | 216 | 60  | 90 | 112 | 5.7 | 1 |
| 1 | 43 | 28.1 | 98  | 2 | 1 | 2 | 1 | 0 | 1 | 137 | 93  | 69  | 6.1  | 6.1  | 6.1   | 95  | 11 | 0.78 | 271 | 148 | 44 | 189 | 5.5 | 1 |
| 1 | 46 | 24.8 | 91  | 1 | 1 | 1 | 0 | 0 | 0 | 127 | 86  | 77  | 7.2  | 7    | 7.1   | 95  | 13 | 0.92 | 227 | 99  | 53 | 145 | 5.1 | 0 |
| 2 | 67 | 25.4 | 91  | 1 | 1 | 2 | 0 | 0 | 0 | 115 | 72  | 57  | 9.5  | 9.2  | 9.35  | 103 | 10 | 0.64 | 220 | 128 | 65 | 120 | 5.8 | 1 |
| 1 | 69 | 25.7 | 86  | 2 | 1 | 1 | 1 | 0 | 1 | 145 | 95  | 127 | 9.8  | 8.2  | 9     | 102 | 13 | 1.09 | 216 | 399 | 41 | 116 | 5.7 | 0 |
| 2 | 68 | 20.4 | 73  | 1 | 1 | 1 | 0 | 0 | 0 | 135 | 76  | 53  | 8.6  | 8.6  | 8.6   | 90  | 19 | 0.8  | 232 | 59  | 63 | 157 | 5.7 | 0 |
| 1 | 60 | 19.6 | 72  | 2 | 1 | 1 | 1 | 1 | 1 | 151 | 96  | 76  | 8.4  | 9.1  | 8.75  | 146 | 20 | 1.42 | 167 | 98  | 65 | 80  | 6.5 | 1 |
| 2 | 41 | 20.0 | 77  | 1 | 1 | 1 | 0 | 0 | 0 | 93  | 63  | 78  | 6.7  | 6.5  | 6.6   | 86  | 11 | 0.72 | 237 | 38  | 81 | 138 | 5.4 | 0 |
| 1 | 66 | 25.0 | 92  | 1 | 2 | 1 | 1 | 0 | 0 | 140 | 96  | 45  | 8.4  | 8.1  | 8.25  | 103 | 14 | 0.98 | 224 | 129 | 47 | 150 | 5.4 | 1 |
| 2 | 76 | 22.2 | 82  | 1 | 1 | 1 | 1 | 0 | 0 | 147 | 90  | 59  | 9.8  | 9.8  | 9.8   | 95  | 12 | 0.81 | 216 | 81  | 66 | 127 | 5.4 | 1 |
| 1 | 58 | 29.1 | 101 | 1 | 2 | 1 | 1 | 0 | 1 | 145 | 97  | 54  | 7    | 6.9  | 6.95  | 86  | 14 | 0.96 | 247 | 59  | 81 | 165 | 5.5 | 1 |
| 1 | 65 | 15.9 | 65  | 2 | 2 | 2 | 1 | 0 | 0 | 131 | 92  | 54  | 9.7  | 9.4  | 9.55  | 64  | 27 | 0.71 | 169 | 62  | 70 | 92  | 5.1 | 1 |
| 1 | 79 | 22.2 | 82  | 1 | 1 | 1 | 1 | 1 | 1 | 144 | 76  | 53  | 10.8 | 10.3 | 10.55 | 132 | 10 | 0.87 | 213 | 171 | 45 | 134 | 6.4 | 1 |
| 1 | 61 | 30.5 | 99  | 1 | 1 | 1 | 1 | 0 | 1 | 121 | 89  | 98  | 6.8  | 6.6  | 6.7   | 116 | 11 | 1.22 | 193 | 201 | 46 | 141 | 5.6 | 0 |
| 1 | 54 | 19.0 | 74  | 2 | 2 | 1 | 0 | 0 | 0 | 123 | 83  | 63  | 8.2  | 8.5  | 8.35  | 118 | 19 | 0.86 | 200 | 62  | 72 | 115 | 5.7 | 1 |
| 2 | 48 | 19.8 | 75  | 1 | 1 | 1 | 0 | 0 | 0 | 109 | 70  | 61  | 6.5  | 6.7  | 6.6   | 95  | 8  | 0.68 | 194 | 100 | 71 | 109 | 5.3 | 0 |

|   |    |      |     |   |   |   |   |   |   |     |     |    |     |     |      |     |    |      |     |     |    |     |      |   |
|---|----|------|-----|---|---|---|---|---|---|-----|-----|----|-----|-----|------|-----|----|------|-----|-----|----|-----|------|---|
| 1 | 50 | 31.2 | 95  | 1 | 1 | 2 | 1 | 0 | 1 | 150 | 93  | 62 | 6.9 | 6.7 | 6.8  | 97  | 20 | 0.79 | 247 | 156 | 49 | 165 | 6    | 0 |
| 1 | 52 | 27.1 | 91  | 1 | 1 | 2 | 0 | 0 | 0 | 126 | 74  | 52 | 7.4 | 7.4 | 7.4  | 105 | 16 | 1.07 | 216 | 199 | 44 | 126 | 5.6  | 1 |
| 1 | 48 | 21.6 | 78  | 2 | 2 | 2 | 0 | 0 | 0 | 114 | 82  | 59 | 7.1 | 7.4 | 7.25 | 100 | 10 | 0.93 | 223 | 131 | 66 | 133 | 5.3  | 1 |
| 1 | 55 | 23.1 | 83  | 2 | 1 | 1 | 0 | 0 | 0 | 120 | 83  | 59 | 7.4 | 7.4 | 7.4  | 88  | 12 | 0.86 | 171 | 123 | 53 | 130 | 5.8  | 0 |
| 2 | 70 | 21.2 | 83  | 1 | 1 | 1 | 0 | 1 | 1 | 132 | 82  | 70 | 8.5 | 8.2 | 8.35 | 154 | 19 | 0.7  | 143 | 80  | 49 | 82  | 7    | 1 |
| 1 | 67 | 23.8 | 94  | 2 | 2 | 1 | 1 | 1 | 0 | 128 | 92  | 76 | 9.4 | 9.2 | 9.3  | 175 | 13 | 0.74 | 238 | 150 | 62 | 147 | 10.8 | 0 |
| 1 | 54 | 24.7 | 90  | 2 | 1 | 1 | 1 | 1 | 1 | 126 | 84  | 60 | 7.2 | 7.2 | 7.2  | 137 | 15 | 0.78 | 114 | 95  | 46 | 57  | 7.5  | 1 |
| 1 | 45 | 25.0 | 93  | 1 | 2 | 1 | 1 | 0 | 0 | 119 | 78  | 64 | 7   | 7   | 7    | 113 | 21 | 1.11 | 207 | 166 | 45 | 137 | 5.6  | 0 |
| 2 | 69 | 23.0 | 87  | 1 | 1 | 1 | 1 | 1 | 1 | 139 | 87  | 71 | 9.4 | 9.3 | 9.35 | 124 | 19 | 0.76 | 156 | 154 | 37 | 100 | 6.8  | 0 |
| 1 | 36 | 38.0 | 112 | 1 | 1 | 1 | 1 | 1 | 1 | 127 | 64  | 63 | 4.5 | 4.1 | 4.3  | 150 | 15 | 1    | 228 | 146 | 37 | 163 | 8.1  | 1 |
| 2 | 51 | 21.5 | 74  | 1 | 1 | 2 | 0 | 0 | 0 | 112 | 82  | 58 | 7   | 7   | 7    | 90  | 11 | 0.62 | 209 | 70  | 70 | 117 | 5.4  | 0 |
| 1 | 53 | 25.9 | 84  | 2 | 2 | 1 | 0 | 0 | 0 | 124 | 80  | 66 | 7.1 | 7.4 | 7.25 | 99  | 10 | 0.95 | 185 | 122 | 62 | 113 | 5.8  | 1 |
| 1 | 54 | 26.6 | 90  | 1 | 1 | 1 | 1 | 0 | 1 | 149 | 91  | 67 | 6.7 | 6.7 | 6.7  | 115 | 16 | 1    | 259 | 308 | 54 | 149 | 5.9  | 1 |
| 1 | 53 | 21.5 | 79  | 1 | 2 | 1 | 1 | 1 | 0 | 131 | 91  | 52 | 7.4 | 7.3 | 7.35 | 125 | 14 | 1.07 | 148 | 80  | 79 | 64  | 5.8  | 1 |
| 1 | 48 | 24.6 | 95  | 1 | 1 | 1 | 1 | 0 | 1 | 140 | 112 | 82 | 8   | 7.9 | 7.95 | 106 | 20 | 1.16 | 235 | 153 | 40 | 177 | 5.5  | 1 |
| 1 | 55 | 27.3 | 91  | 1 | 2 | 1 | 1 | 0 | 0 | 145 | 94  | 66 | 8   | 7.9 | 7.95 | 100 | 11 | 0.79 | 232 | 128 | 59 | 147 | 5.5  | 1 |
| 1 | 53 | 23.2 | 86  | 1 | 2 | 2 | 1 | 0 | 1 | 137 | 97  | 74 | 7.5 | 7.6 | 7.55 | 105 | 15 | 1.06 | 158 | 190 | 51 | 82  | 5.5  | 0 |
| 2 | 50 | 27.1 | 90  | 1 | 1 | 1 | 0 | 0 | 0 | 139 | 84  | 75 | 7.3 | 7.1 | 7.2  | 94  | 12 | 0.69 | 211 | 159 | 41 | 132 | 5.8  | 0 |
| 1 | 55 | 25.9 | 94  | 1 | 2 | 1 | 1 | 0 | 1 | 111 | 75  | 57 | 7.5 | 7.5 | 7.5  | 98  | 18 | 0.98 | 173 | 96  | 70 | 91  | 6    | 0 |
| 1 | 55 | 25.3 | 94  | 1 | 1 | 1 | 1 | 0 | 0 | 134 | 90  | 64 | 7.2 | 7.3 | 7.25 | 110 | 19 | 1.08 | 205 | 138 | 47 | 127 | 5.5  | 0 |
| 1 | 55 | 22.9 | 81  | 1 | 1 | 1 | 0 | 0 | 1 | 122 | 85  | 60 | 6.9 | 7.1 | 7    | 96  | 19 | 0.98 | 198 | 65  | 47 | 136 | 5.9  | 1 |
| 2 | 42 | 21.6 | 84  | 1 | 1 | 1 | 0 | 0 | 0 | 105 | 71  | 64 | 7   | 7.1 | 7.05 | 81  | 9  | 0.52 | 159 | 84  | 59 | 86  | 5.4  | 1 |
| 2 | 49 | 24.0 | 82  | 1 | 1 | 2 | 0 | 0 | 1 | 129 | 83  | 58 | 5.8 | 5.9 | 5.85 | 107 | 14 | 0.74 | 255 | 188 | 60 | 158 | 5.9  | 1 |
| 1 | 56 | 24.2 | 89  | 1 | 2 | 1 | 0 | 0 | 1 | 129 | 85  | 75 | 8.1 | 8.2 | 8.15 | 111 | 12 | 0.87 | 248 | 192 | 57 | 153 | 5.7  | 0 |
| 2 | 57 | 28.5 | 90  | 1 | 1 | 2 | 1 | 1 | 1 | 142 | 96  | 51 | 8.9 | 8.5 | 8.7  | 118 | 14 | 0.6  | 170 | 134 | 42 | 107 | 6.3  | 1 |
| 1 | 61 | 26.2 | 89  | 2 | 1 | 2 | 1 | 1 | 1 | 163 | 74  | 59 | 9.7 | 9.3 | 9.5  | 163 | 10 | 1.01 | 159 | 144 | 32 | 109 | 7.4  | 1 |
| 1 | 56 | 23.5 | 91  | 2 | 2 | 1 | 0 | 0 | 1 | 117 | 77  | 53 | 7.9 | 8.1 | 8    | 108 | 10 | 0.9  | 192 | 219 | 43 | 111 | 6    | 1 |
| 2 | 62 | 19.6 | 73  | 1 | 1 | 2 | 1 | 0 | 0 | 143 | 99  | 63 | 7.5 | 7.3 | 7.4  | 81  | 16 | 0.6  | 211 | 48  | 64 | 133 | 5.4  | 0 |
| 1 | 54 | 25.3 | 84  | 2 | 1 | 1 | 1 | 0 | 1 | 150 | 111 | 75 | 8.6 | 9   | 8.8  | 103 | 12 | 0.84 | 241 | 101 | 50 | 157 | 6    | 1 |



|   |    |      |       |   |   |   |   |   |   |     |     |    |     |     |      |     |    |      |     |     |    |     |     |   |
|---|----|------|-------|---|---|---|---|---|---|-----|-----|----|-----|-----|------|-----|----|------|-----|-----|----|-----|-----|---|
| 1 | 67 | 27.2 | 97    | 2 | 1 | 2 | 1 | 1 | 1 | 132 | 75  | 63 | 8.1 | 8.2 | 8.15 | 163 | 15 | 0.94 | 152 | 88  | 67 | 63  | 7.2 | 0 |
| 2 | 71 | 23.5 | 82    | 1 | 1 | 1 | 0 | 1 | 1 | 138 | 74  | 68 | 9.4 | 9.4 | 9.4  | 109 | 12 | 0.62 | 150 | 92  | 50 | 82  | 6.7 | 1 |
| 2 | 65 | 23.5 | 83    | 1 | 1 | 1 | 1 | 0 | 1 | 132 | 81  | 60 | 7.8 | 7.7 | 7.75 | 106 | 11 | 0.77 | 234 | 179 | 44 | 151 | 5.6 | 1 |
| 2 | 63 | 21.4 | 81    | 1 | 1 | 1 | 1 | 0 | 1 | 142 | 75  | 56 | 8.1 | 8.4 | 8.25 | 96  | 17 | 0.62 | 246 | 92  | 65 | 158 | 5.8 | 1 |
| 2 | 73 | 22.5 | 81.5  | 1 | 1 | 2 | 1 | 1 | 1 | 145 | 79  | 68 | 9.6 | 9.7 | 9.65 | 145 | 13 | 0.69 | 270 | 431 | 47 | 127 | 6.9 | 1 |
| 2 | 57 | 23.7 | 83    | 1 | 1 | 1 | 1 | 0 | 1 | 139 | 87  | 62 | 8.4 | 8.2 | 8.3  | 91  | 11 | 0.88 | 212 | 123 | 56 | 125 | 5.6 | 1 |
| 2 | 55 | 20.8 | 76    | 1 | 1 | 1 | 0 | 0 | 0 | 102 | 67  | 67 | 8.5 | 8.5 | 8.5  | 103 | 9  | 0.57 | 173 | 88  | 59 | 96  | 5.4 | 1 |
| 1 | 45 | 23.5 | 80    | 2 | 2 | 1 | 1 | 0 | 0 | 138 | 93  | 53 | 7.2 | 7.1 | 7.15 | 108 | 12 | 0.9  | 227 | 156 | 49 | 142 | 5.3 | 0 |
| 2 | 49 | 20.5 | 72    | 1 | 1 | 1 | 0 | 0 | 0 | 122 | 87  | 79 | 7.2 | 7.2 | 7.2  | 92  | 9  | 0.61 | 171 | 125 | 56 | 87  | 5.6 | 1 |
| 1 | 50 | 24.8 | 91    | 1 | 2 | 1 | 0 | 0 | 0 | 123 | 83  | 71 | 7.5 | 7.7 | 7.6  | 117 | 13 | 0.72 | 191 | 187 | 42 | 122 | 6.2 | 1 |
| 1 | 52 | 23.0 | 82    | 2 | 2 | 1 | 1 | 0 | 1 | 147 | 89  | 58 | 8.3 | 8.4 | 8.35 | 104 | 12 | 0.86 | 246 | 164 | 61 | 152 | 5.6 | 1 |
| 1 | 48 | 21.8 | 83    | 2 | 1 | 1 | 0 | 0 | 1 | 102 | 76  | 55 | 8.6 | 8.8 | 8.7  | 83  | 14 | 0.84 | 249 | 56  | 79 | 156 | 5.3 | 1 |
| 2 | 42 | 22.2 | 78.5  | 1 | 1 | 2 | 1 | 0 | 0 | 159 | 99  | 70 | 4.8 | 4.9 | 4.85 | 85  | 7  | 0.62 | 185 | 62  | 69 | 104 | 5.1 | 0 |
| 1 | 72 | 30.5 | 104   | 1 | 1 | 2 | 0 | 0 | 0 | 130 | 77  | 53 | 8.3 | 8.4 | 8.35 | 99  | 17 | 0.76 | 197 | 68  | 79 | 113 | 6   | 0 |
| 1 | 55 | 25.9 | 95    | 2 | 2 | 1 | 1 | 0 | 1 | 135 | 98  | 66 | 7.5 | 7.4 | 7.45 | 122 | 13 | 0.77 | 174 | 260 | 46 | 98  | 6.2 | 1 |
| 1 | 48 | 30.5 | 99    | 2 | 2 | 1 | 1 | 0 | 1 | 136 | 94  | 63 | 8.3 | 7.9 | 8.1  | 119 | 11 | 0.76 | 207 | 294 | 43 | 127 | 5.6 | 0 |
| 1 | 49 | 25.1 | 88    | 1 | 2 | 1 | 0 | 0 | 0 | 115 | 76  | 61 | 6.8 | 6.7 | 6.75 | 92  | 13 | 1.01 | 220 | 84  | 49 | 142 | 5.6 | 0 |
| 1 | 56 | 22.4 | 84.5  | 1 | 2 | 1 | 1 | 0 | 0 | 130 | 86  | 68 | 6.1 | 6.1 | 6.1  | 110 | 14 | 0.95 | 130 | 100 | 54 | 66  | 5.4 | 0 |
| 1 | 68 | 25.5 | 89    | 2 | 1 | 1 | 1 | 1 | 1 | 154 | 104 | 59 | 9.7 | 9.5 | 9.6  | 121 | 18 | 1.18 | 168 | 56  | 55 | 108 | 6.7 | 0 |
| 1 | 64 | 24.0 | 97    | 1 | 1 | 1 | 1 | 0 | 1 | 117 | 86  | 67 | 8.1 | 8.1 | 8.1  | 88  | 18 | 1.21 | 113 | 83  | 38 | 67  | 5.8 | 0 |
| 1 | 63 | 27.1 | 93    | 2 | 1 | 2 | 1 | 1 | 0 | 116 | 74  | 68 | 7.1 | 7.3 | 7.2  | 153 | 15 | 1.33 | 146 | 174 | 42 | 75  | 8.7 | 0 |
| 1 | 60 | 28.1 | 103   | 2 | 1 | 1 | 0 | 1 | 1 | 129 | 82  | 64 | 6.7 | 6.6 | 6.65 | 112 | 12 | 0.93 | 174 | 55  | 48 | 118 | 6.7 | 0 |
| 1 | 87 | 20.6 | 82    | 2 | 1 | 1 | 1 | 0 | 0 | 170 | 104 | 36 | 9.6 | 8.6 | 9.1  | 84  | 24 | 1.03 | 196 | 41  | 65 | 117 | 5.4 | 0 |
| 1 | 63 | 21.9 | 77    | 2 | 1 | 2 | 0 | 0 | 1 | 113 | 76  | 51 | 8.5 | 8.3 | 8.4  | 84  | 15 | 1.05 | 198 | 108 | 57 | 127 | 5.2 | 0 |
| 1 | 68 | 28.7 | 102.5 | 2 | 1 | 2 | 1 | 0 | 1 | 123 | 79  | 69 | 7.3 | 7.4 | 7.35 | 93  | 14 | 0.87 | 144 | 124 | 38 | 91  | 6   | 1 |
| 2 | 70 | 23.7 | 90.4  | 1 | 1 | 1 | 1 | 0 | 1 | 141 | 84  | 58 | 8.6 | 9.3 | 8.95 | 90  | 14 | 0.59 | 278 | 96  | 57 | 84  | 5.9 | 1 |
| 1 | 63 | 22.8 | 84    | 1 | 1 | 2 | 1 | 0 | 0 | 125 | 86  | 63 | 9.4 | 9.4 | 9.4  | 97  | 19 | 0.99 | 178 | 73  | 65 | 100 | 5.7 | 1 |
| 1 | 68 | 26.5 | 92    | 2 | 2 | 2 | 1 | 1 | 1 | 146 | 88  | 74 | 9.3 | 8.9 | 9.1  | 146 | 18 | 0.94 | 157 | 81  | 77 | 81  | 6.5 | 0 |
| 2 | 66 | 21.1 | 76    | 1 | 1 | 1 | 0 | 0 | 0 | 114 | 83  | 84 | 9.1 | 9.3 | 9.2  | 104 | 14 | 0.74 | 194 | 93  | 46 | 122 | 5.6 | 0 |

|   |    |      |      |   |   |   |   |   |   |     |    |    |      |     |      |     |    |      |     |     |    |     |     |   |
|---|----|------|------|---|---|---|---|---|---|-----|----|----|------|-----|------|-----|----|------|-----|-----|----|-----|-----|---|
| 2 | 67 | 18.8 | 72.5 | 2 | 1 | 1 | 0 | 0 | 0 | 120 | 79 | 51 | 7.4  | 7.4 | 7.4  | 104 | 19 | 0.72 | 185 | 75  | 57 | 110 | 5.5 | 1 |
| 1 | 51 | 22.7 | 84.5 | 2 | 2 | 1 | 0 | 1 | 1 | 122 | 80 | 56 | 8.4  | 8.1 | 8.25 | 125 | 14 | 1.13 | 193 | 72  | 73 | 110 | 6   | 0 |
| 1 | 73 | 26.1 | 90   | 1 | 1 | 1 | 1 | 1 | 1 | 142 | 90 | 62 | 10.3 | 9.9 | 10.1 | 124 | 18 | 0.86 | 191 | 98  | 35 | 137 | 7.2 | 1 |
| 2 | 58 | 24.7 | 92   | 1 | 1 | 1 | 0 | 0 | 1 | 115 | 73 | 57 | 7.7  | 7.6 | 7.65 | 94  | 14 | 0.74 | 212 | 151 | 65 | 120 | 6   | 0 |
| 1 | 71 | 21.0 | 79.5 | 2 | 1 | 1 | 1 | 0 | 1 | 138 | 91 | 65 | 8.8  | 8.8 | 8.8  | 94  | 14 | 0.97 | 240 | 71  | 52 | 162 | 5.5 | 1 |
| 2 | 50 | 18.7 | 70.5 | 1 | 1 | 1 | 0 | 0 | 0 | 97  | 61 | 63 | 7.2  | 7.2 | 7.2  | 79  | 15 | 0.74 | 189 | 68  | 52 | 118 | 5.5 | 0 |
| 1 | 56 | 28.4 | 90   | 2 | 2 | 2 | 1 | 1 | 1 | 141 | 92 | 53 | 8.6  | 8.5 | 8.55 | 169 | 15 | 0.91 | 151 | 129 | 68 | 65  | 5.4 | 0 |
| 2 | 59 | 25.3 | 86   | 1 | 1 | 2 | 1 | 0 | 1 | 139 | 80 | 52 | 7.8  | 8.8 | 8.3  | 80  | 15 | 0.75 | 147 | 43  | 63 | 75  | 5.4 | 1 |
| 1 | 53 | 20.7 | 80   | 1 | 1 | 1 | 0 | 0 | 0 | 115 | 71 | 74 | 7.6  | 7.6 | 7.6  | 91  | 16 | 0.96 | 155 | 60  | 79 | 76  | 6   | 0 |
| 1 | 57 | 22.0 | 76   | 2 | 1 | 2 | 0 | 0 | 0 | 126 | 78 | 57 | 7.1  | 7   | 7.05 | 82  | 13 | 1.03 | 223 | 67  | 82 | 134 | 5.4 | 0 |
| 2 | 79 | 23.5 | 90.5 | 1 | 1 | 1 | 1 | 0 | 1 | 142 | 74 | 51 | 8.3  | 8.2 | 8.25 | 104 | 17 | 0.91 | 228 | 163 | 61 | 134 | 5.9 | 1 |
| 2 | 48 | 21.8 | 82.5 | 1 | 1 | 1 | 1 | 0 | 1 | 138 | 91 | 50 | 6.9  | 7.1 | 7    | 103 | 10 | 0.65 | 229 | 103 | 51 | 170 | 5.8 | 0 |
| 2 | 55 | 23.3 | 82   | 1 | 1 | 2 | 1 | 0 | 0 | 133 | 91 | 67 | 7.3  | 7.3 | 7.3  | 100 | 12 | 0.54 | 200 | 99  | 52 | 134 | 5.6 | 1 |
| 1 | 53 | 21.6 | 84   | 2 | 2 | 1 | 0 | 0 | 1 | 122 | 88 | 68 | 9.5  | 9.3 | 9.4  | 123 | 8  | 0.52 | 244 | 237 | 82 | 128 | 5.6 | 0 |
| 2 | 56 | 21.3 | 87   | 1 | 1 | 2 | 0 | 0 | 0 | 127 | 84 | 75 | 8.3  | 8.3 | 8.3  | 95  | 13 | 0.74 | 208 | 95  | 77 | 110 | 5.4 | 1 |
| 1 | 68 | 22.6 | 93   | 2 | 1 | 2 | 1 | 0 | 1 | 144 | 93 | 62 | 8.8  | 8.5 | 8.65 | 92  | 16 | 0.86 | 162 | 59  | 60 | 130 | 5.3 | 0 |
| 1 | 64 | 24.4 | 87   | 2 | 1 | 1 | 0 | 0 | 1 | 129 | 88 | 53 | 8.1  | 7.8 | 7.95 | 116 | 15 | 1    | 192 | 210 | 36 | 123 | 5.9 | 1 |
| 2 | 55 | 22.3 | 77   | 1 | 1 | 1 | 0 | 0 | 1 | 126 | 86 | 63 | 6.7  | 6.4 | 6.55 | 90  | 16 | 0.63 | 232 | 74  | 94 | 164 | 5.6 | 1 |
| 1 | 44 | 24.0 | 86   | 2 | 1 | 1 | 0 | 0 | 0 | 108 | 66 | 62 | 8    | 7.8 | 7.9  | 108 | 18 | 0.82 | 232 | 152 | 42 | 54  | 5.8 | 0 |
| 1 | 84 | 21.7 | 87.3 | 1 | 2 | 2 | 0 | 1 | 1 | 132 | 80 | 66 | 9.5  | 9.1 | 9.3  | 116 | 18 | 0.89 | 96  | 78  | 34 | 91  | 5.8 | 1 |
| 1 | 65 | 23.6 | 89   | 2 | 1 | 2 | 1 | 1 | 1 | 132 | 92 | 68 | 8.7  | 8.4 | 8.55 | 131 | 23 | 0.72 | 157 | 75  | 55 | 114 | 6.2 | 0 |
| 1 | 38 | 36.8 | 113  | 1 | 1 | 1 | 1 | 0 | 1 | 147 | 93 | 59 | 6.2  | 5.8 | 6    | 105 | 14 | 0.75 | 208 | 126 | 44 | 94  | 6.4 | 0 |
| 2 | 49 | 23.6 | 86.5 | 1 | 1 | 1 | 1 | 0 | 0 | 117 | 81 | 69 | 6.8  | 6.7 | 6.75 | 95  | 11 | 0.81 | 184 | 49  | 53 | 151 | 5.4 | 1 |
| 1 | 51 | 23.1 | 85.7 | 2 | 2 | 2 | 1 | 0 | 1 | 142 | 90 | 61 | 7.9  | 8   | 7.95 | 96  | 15 | 1.08 | 189 | 101 | 91 | 135 | 5.4 | 1 |
| 1 | 49 | 25.4 | 95   | 2 | 2 | 2 | 1 | 0 | 0 | 112 | 70 | 53 | 7.2  | 7   | 7.1  | 123 | 25 | 0.98 | 220 | 107 | 72 | 89  | 5.9 | 0 |
| 1 | 52 | 24.7 | 85   | 2 | 1 | 1 | 1 | 0 | 1 | 126 | 85 | 59 | 7.3  | 7.4 | 7.35 | 98  | 8  | 0.86 | 174 | 187 | 59 | 139 | 5.4 | 1 |
| 2 | 61 | 23.1 | 81   | 1 | 1 | 1 | 1 | 0 | 1 | 130 | 88 | 67 | 7.1  | 6.9 | 7    | 88  | 17 | 0.67 | 227 | 121 | 58 | 115 | 5.5 | 1 |
| 1 | 59 | 25.8 | 91.5 | 1 | 1 | 2 | 0 | 1 | 1 | 115 | 76 | 64 | 8    | 7.7 | 7.85 | 123 | 14 | 1.13 | 190 | 71  | 51 | 74  | 6.6 | 1 |
| 2 | 58 | 21.9 | 81   | 1 | 1 | 1 | 1 | 0 | 0 | 165 | 92 | 66 | 8.6  | 8.7 | 8.65 | 85  | 18 | 0.78 | 201 | 54  | 66 | 123 | 5.4 | 1 |

|   |    |      |      |   |   |   |   |   |   |     |     |    |      |      |       |     |    |      |     |     |    |     |     |   |
|---|----|------|------|---|---|---|---|---|---|-----|-----|----|------|------|-------|-----|----|------|-----|-----|----|-----|-----|---|
| 1 | 64 | 24.3 | 95   | 2 | 1 | 1 | 1 | 1 | 1 | 144 | 85  | 85 | 9.4  | 9.1  | 9.25  | 170 | 14 | 0.92 | 142 | 65  | 62 | 99  | 7.2 | 1 |
| 2 | 52 | 18.7 | 69   | 1 | 1 | 1 | 0 | 0 | 1 | 120 | 74  | 67 | 7.2  | 7.2  | 7.2   | 85  | 21 | 0.91 | 185 | 67  | 72 | 119 | 5.6 | 1 |
| 2 | 63 | 19.7 | 75   | 1 | 1 | 1 | 1 | 0 | 0 | 115 | 71  | 59 | 7.5  | 7.6  | 7.55  | 75  | 18 | 0.56 | 204 | 43  | 80 | 110 | 5.6 | 1 |
| 2 | 52 | 19.9 | 77   | 1 | 1 | 1 | 0 | 0 | 0 | 102 | 69  | 65 | 7.5  | 7.5  | 7.5   | 93  | 17 | 0.68 | 183 | 60  | 66 | 120 | 5.1 | 1 |
| 1 | 54 | 24.5 | 83.7 | 2 | 1 | 1 | 0 | 0 | 0 | 111 | 73  | 63 | 6.8  | 6.9  | 6.85  | 101 | 15 | 1.08 | 192 | 68  | 55 | 159 | 5.7 | 1 |
| 1 | 50 | 22.3 | 76   | 1 | 2 | 1 | 1 | 0 | 1 | 128 | 93  | 66 | 6.8  | 6.6  | 6.7   | 94  | 14 | 1.17 | 239 | 76  | 65 | 117 | 5.6 | 1 |
| 1 | 47 | 26.5 | 91   | 2 | 1 | 1 | 0 | 0 | 0 | 127 | 85  | 73 | 7.3  | 7.1  | 7.2   | 105 | 15 | 0.79 | 191 | 83  | 66 | 103 | 5   | 0 |
| 2 | 74 | 25.5 | 84   | 1 | 1 | 1 | 1 | 0 | 1 | 128 | 79  | 53 | 8    | 8.3  | 8.15  | 101 | 22 | 0.99 | 171 | 109 | 58 | 99  | 5.7 | 0 |
| 1 | 55 | 23.6 | 89   | 1 | 2 | 1 | 1 | 0 | 0 | 125 | 90  | 64 | 7.3  | 7.5  | 7.4   | 93  | 12 | 0.97 | 174 | 75  | 75 | 136 | 5   | 0 |
| 1 | 52 | 22.4 | 76   | 2 | 1 | 1 | 0 | 0 | 0 | 112 | 77  | 64 | 8.8  | 8.9  | 8.85  | 84  | 14 | 1.11 | 205 | 109 | 56 | 122 | 5.1 | 1 |
| 1 | 77 | 25.2 | 94   | 2 | 2 | 1 | 1 | 0 | 0 | 123 | 74  | 50 | 9.2  | 8.7  | 8.95  | 109 | 25 | 1.14 | 177 | 80  | 41 | 122 | 5.2 | 1 |
| 1 | 74 | 20.7 | 85   | 2 | 1 | 1 | 1 | 0 | 0 | 133 | 78  | 62 | 11.1 | 10.6 | 10.85 | 96  | 14 | 1.09 | 145 | 57  | 42 | 106 | 5.5 | 1 |
| 2 | 70 | 23.8 | 88   | 1 | 1 | 1 | 1 | 0 | 1 | 140 | 88  | 53 | 8.8  | 8.7  | 8.75  | 99  | 16 | 0.71 | 252 | 252 | 55 | 170 | 5.5 | 1 |
| 1 | 55 | 23.1 | 87   | 2 | 2 | 2 | 0 | 0 | 1 | 124 | 85  | 68 | 8.3  | 8.4  | 8.35  | 106 | 10 | 1.06 | 209 | 209 | 70 | 124 | 5.5 | 0 |
| 1 | 60 | 24.1 | 92   | 1 | 1 | 1 | 1 | 0 | 0 | 126 | 91  | 58 | 7.1  | 6.7  | 6.9   | 102 | 16 | 1.04 | 181 | 181 | 41 | 103 | 5.7 | 1 |
| 1 | 61 | 25.7 | 90   | 1 | 1 | 2 | 0 | 0 | 0 | 119 | 87  | 66 | 7.9  | 7.8  | 7.85  | 93  | 24 | 0.79 | 156 | 36  | 65 | 89  | 6   | 0 |
| 1 | 55 | 23.7 | 90.5 | 2 | 1 | 2 | 1 | 0 | 1 | 143 | 93  | 52 | 6.5  | 6.3  | 6.4   | 101 | 12 | 0.91 | 228 | 228 | 54 | 166 | 5.6 | 1 |
| 1 | 58 | 21.5 | 79   | 1 | 1 | 1 | 0 | 0 | 1 | 108 | 70  | 39 | 7.5  | 7.5  | 7.5   | 92  | 25 | 0.71 | 211 | 211 | 61 | 128 | 6.1 | 1 |
| 1 | 47 | 21.4 | 78   | 2 | 2 | 2 | 0 | 0 | 0 | 127 | 89  | 61 | 7.4  | 7.3  | 7.35  | 95  | 17 | 1.03 | 148 | 148 | 57 | 74  | 5.3 | 1 |
| 1 | 48 | 27.9 | 93   | 2 | 1 | 1 | 1 | 0 | 1 | 152 | 101 | 72 | 7.2  | 7.2  | 7.2   | 97  | 12 | 0.95 | 255 | 255 | 45 | 180 | 5.5 | 1 |
| 2 | 66 | 28.4 | 88   | 1 | 1 | 2 | 1 | 1 | 1 | 161 | 87  | 93 | 7.8  | 7.9  | 7.85  | 128 | 15 | 0.92 | 288 | 229 | 47 | 197 | 5.6 | 0 |
| 2 | 54 | 24.0 | 83   | 2 | 2 | 2 | 0 | 0 | 1 | 132 | 80  | 46 | 6.8  | 7.1  | 6.95  | 95  | 20 | 0.75 | 250 | 250 | 68 | 167 | 5.6 | 1 |
| 2 | 48 | 21.6 | 81   | 2 | 2 | 1 | 0 | 0 | 1 | 98  | 65  | 58 | 7.5  | 7.4  | 7.45  | 93  | 10 | 0.67 | 208 | 208 | 79 | 110 | 5.4 | 1 |
| 1 | 51 | 25.0 | 93   | 2 | 1 | 2 | 0 | 0 | 1 | 128 | 86  | 67 | 7.8  | 7.7  | 7.75  | 99  | 9  | 0.9  | 185 | 185 | 32 | 73  | 5.6 | 1 |
| 1 | 48 | 28.1 | 96.5 | 2 | 2 | 1 | 1 | 0 | 1 | 118 | 77  | 49 | 7.5  | 7.8  | 7.65  | 107 | 16 | 1.04 | 155 | 155 | 41 | 95  | 5.5 | 1 |
| 1 | 56 | 24.2 | 80   | 1 | 2 | 1 | 0 | 0 | 0 | 127 | 86  | 60 | 6.2  | 6.4  | 6.3   | 94  | 17 | 1.08 | 174 | 174 | 60 | 104 | 5.1 | 1 |
| 1 | 48 | 23.2 | 88   | 1 | 1 | 1 | 0 | 0 | 1 | 129 | 83  | 60 | 6.3  | 6.1  | 6.2   | 89  | 20 | 0.91 | 202 | 202 | 38 | 138 | 5.7 | 1 |
| 1 | 60 | 23.8 | 87   | 1 | 1 | 1 | 1 | 0 | 0 | 127 | 95  | 62 | 9.4  | 8.4  | 8.9   | 104 | 12 | 0.95 | 156 | 156 | 67 | 83  | 5.4 | 1 |
| 2 | 53 | 21.5 | 80   | 1 | 1 | 1 | 0 | 0 | 0 | 139 | 84  | 99 | 8.1  | 6    | 7.05  | 94  | 12 | 0.63 | 174 | 174 | 64 | 105 | 5.2 | 0 |

|   |    |      |      |   |   |   |   |   |   |     |     |    |     |     |      |     |    |      |     |     |    |     |     |   |
|---|----|------|------|---|---|---|---|---|---|-----|-----|----|-----|-----|------|-----|----|------|-----|-----|----|-----|-----|---|
| 1 | 46 | 25.5 | 100  | 2 | 2 | 2 | 1 | 0 | 1 | 156 | 104 | 87 | 6.7 | 6.3 | 6.5  | 103 | 12 | 0.74 | 179 | 179 | 43 | 106 | 5.9 | 0 |
| 1 | 53 | 25.1 | 86   | 1 | 1 | 1 | 1 | 0 | 1 | 133 | 91  | 58 | 7.1 | 7.3 | 7.2  | 104 | 10 | 0.8  | 246 | 246 | 45 | 160 | 5.5 | 1 |
| 2 | 53 | 21.2 | 77   | 1 | 1 | 1 | 1 | 1 | 1 | 136 | 96  | 56 | 7.8 | 7.5 | 7.65 | 122 | 14 | 0.65 | 168 | 168 | 48 | 103 | 7.1 | 0 |
| 1 | 53 | 21.3 | 79.5 | 1 | 1 | 2 | 0 | 0 | 1 | 107 | 76  | 58 | 6.8 | 6.7 | 6.75 | 106 | 15 | 0.9  | 212 | 212 | 49 | 144 | 5.7 | 0 |
| 2 | 64 | 20.5 | 74.5 | 1 | 1 | 1 | 0 | 0 | 1 | 117 | 79  | 65 | 7.4 | 7.7 | 7.55 | 84  | 13 | 0.9  | 214 | 214 | 57 | 135 | 5.4 | 1 |
| 1 | 58 | 29.6 | 105  | 1 | 1 | 1 | 1 | 0 | 1 | 134 | 92  | 73 | 7.2 | 7   | 7.1  | 108 | 16 | 0.9  | 195 | 195 | 45 | 122 | 6.1 | 1 |
| 1 | 48 | 28.3 | 98.2 | 2 | 1 | 2 | 1 | 0 | 0 | 119 | 83  | 68 | 6.1 | 6.1 | 6.1  | 109 | 11 | 0.87 | 189 | 189 | 58 | 105 | 5.9 | 1 |
| 1 | 51 | 27.6 | 96   | 2 | 1 | 1 | 1 | 1 | 1 | 144 | 96  | 65 | 10  | 9.4 | 9.7  | 142 | 9  | 0.93 | 211 | 211 | 67 | 131 | 6.2 | 0 |
| 2 | 74 | 22.5 | 86.8 | 1 | 1 | 1 | 1 | 0 | 0 | 117 | 74  | 65 | 8.9 | 8.9 | 8.9  | 92  | 17 | 0.68 | 188 | 188 | 49 | 114 | 5.7 | 0 |
| 1 | 48 | 25.8 | 91.5 | 1 | 1 | 1 | 1 | 0 | 1 | 131 | 93  | 65 | 8   | 8.2 | 8.1  | 102 | 16 | 0.83 | 218 | 218 | 51 | 145 | 5.7 | 1 |
| 1 | 52 | 24.9 | 86.5 | 1 | 1 | 1 | 1 | 0 | 1 | 130 | 90  | 81 | 7.5 | 7.5 | 7.5  | 93  | 17 | 0.96 | 157 | 157 | 60 | 90  | 5.4 | 1 |
| 2 | 59 | 20.3 | 67   | 1 | 1 | 1 | 0 | 0 | 1 | 105 | 74  | 56 | 7.5 | 7.6 | 7.55 | 87  | 14 | 0.65 | 267 | 267 | 86 | 173 | 5.8 | 0 |
| 2 | 73 | 25.2 | 98   | 1 | 1 | 1 | 0 | 0 | 1 | 120 | 87  | 54 | 7.2 | 7.1 | 7.15 | 87  | 16 | 0.74 | 215 | 215 | 36 | 140 | 5   | 0 |
| 1 | 47 | 22.1 | 80.5 | 2 | 2 | 1 | 0 | 0 | 1 | 130 | 88  | 59 | 8.3 | 7.9 | 8.1  | 96  | 17 | 1.11 | 211 | 211 | 54 | 118 | 5.7 | 0 |
| 1 | 48 | 25.8 | 89   | 2 | 1 | 1 | 0 | 0 | 0 | 123 | 83  | 50 | 6   | 6.2 | 6.1  | 101 | 17 | 0.89 | 189 | 189 | 82 | 109 | 5.5 | 1 |
| 1 | 47 | 24.2 | 86.5 | 1 | 2 | 1 | 1 | 0 | 1 | 125 | 87  | 67 | 7.9 | 7.5 | 7.7  | 102 | 15 | 0.82 | 201 | 201 | 43 | 126 | 5.5 | 1 |
| 1 | 62 | 22.4 | 95.5 | 1 | 2 | 2 | 1 | 0 | 0 | 124 | 85  | 79 | 9.9 | 10  | 9.95 | 108 | 21 | 0.78 | 151 | 151 | 51 | 66  | 6   | 1 |
| 1 | 48 | 24.4 | 90.5 | 2 | 1 | 1 | 0 | 0 | 1 | 129 | 81  | 58 | 6.9 | 6.8 | 6.85 | 103 | 16 | 1.11 | 202 | 202 | 44 | 136 | 5.8 | 1 |
| 1 | 57 | 22.9 | 84   | 1 | 1 | 1 | 1 | 0 | 1 | 135 | 90  | 86 | 8.2 | 7.2 | 7.7  | 112 | 15 | 0.7  | 136 | 136 | 50 | 73  | 5.5 | 1 |
| 1 | 80 | 22.0 | 83   | 1 | 1 | 1 | 1 | 0 | 0 | 131 | 64  | 50 | 9.6 | 9.8 | 9.7  | 114 | 23 | 0.79 | 132 | 132 | 52 | 75  | 5.9 | 1 |
| 2 | 73 | 22.4 | 84   | 1 | 1 | 1 | 1 | 0 | 1 | 131 | 76  | 50 | 9.6 | 9.7 | 9.65 | 84  | 21 | 1.01 | 220 | 220 | 84 | 120 | 5.7 | 1 |
| 2 | 63 | 23.9 | 83   | 1 | 1 | 1 | 1 | 1 | 1 | 129 | 89  | 69 | 8.6 | 8.3 | 8.45 | 124 | 18 | 0.95 | 183 | 183 | 50 | 101 | 6.1 | 0 |
| 2 | 65 | 22.8 | 80   | 1 | 1 | 2 | 1 | 0 | 0 | 147 | 92  | 59 | 8   | 7.7 | 7.85 | 97  | 15 | 0.91 | 209 | 46  | 57 | 138 | 5.8 | 0 |
| 1 | 47 | 20.3 | 77   | 1 | 1 | 1 | 0 | 0 | 1 | 104 | 69  | 59 | 7.4 | 7.3 | 7.35 | 80  | 11 | 0.77 | 228 | 228 | 53 | 131 | 5.4 | 0 |
| 1 | 53 | 21.7 | 84   | 1 | 1 | 2 | 1 | 0 | 0 | 127 | 93  | 64 | 8.5 | 8.4 | 8.45 | 100 | 15 | 0.88 | 148 | 148 | 40 | 93  | 5.3 | 1 |
| 1 | 66 | 25.3 | 93   | 1 | 2 | 1 | 1 | 1 | 1 | 121 | 81  | 67 | 9.1 | 8.9 | 9    | 113 | 20 | 0.87 | 209 | 209 | 57 | 118 | 6.8 | 1 |
| 1 | 53 | 26.0 | 90.8 | 2 | 1 | 1 | 0 | 1 | 0 | 115 | 77  | 56 | 7.9 | 8   | 7.95 | 137 | 11 | 0.98 | 177 | 177 | 44 | 119 | 6.7 | 1 |
| 1 | 51 | 23.5 | 84   | 2 | 1 | 2 | 0 | 0 | 0 | 126 | 86  | 60 | 8.3 | 8.3 | 8.3  | 102 | 18 | 0.81 | 183 | 183 | 46 | 123 | 5.4 | 1 |
| 1 | 54 | 25.2 | 93   | 2 | 1 | 1 | 1 | 1 | 0 | 133 | 78  | 63 | 7   | 7   | 7    | 154 | 19 | 0.99 | 147 | 147 | 55 | 83  | 7.1 | 1 |

|   |    |      |       |   |   |   |   |   |   |     |    |    |      |      |      |     |    |      |     |     |    |     |     |   |
|---|----|------|-------|---|---|---|---|---|---|-----|----|----|------|------|------|-----|----|------|-----|-----|----|-----|-----|---|
| 2 | 71 | 24.0 | 86    | 1 | 1 | 1 | 1 | 0 | 1 | 144 | 88 | 79 | 9.1  | 8.9  | 9    | 93  | 12 | 0.54 | 233 | 233 | 48 | 148 | 5.6 | 0 |
| 2 | 57 | 21.1 | 83    | 1 | 1 | 1 | 1 | 0 | 1 | 151 | 83 | 55 | 7.2  | 7.2  | 7.2  | 80  | 16 | 0.9  | 231 | 231 | 77 | 152 | 5.1 | 1 |
| 2 | 51 | 26.7 | 91.5  | 1 | 1 | 1 | 0 | 0 | 0 | 116 | 75 | 67 | 6    | 6.2  | 6.1  | 92  | 16 | 0.8  | 183 | 183 | 66 | 107 | 5.5 | 1 |
| 2 | 60 | 20.3 | 72    | 1 | 1 | 2 | 0 | 0 | 0 | 113 | 66 | 53 | 7.6  | 7.7  | 7.65 | 94  | 14 | 0.63 | 188 | 188 | 63 | 109 | 5.4 | 1 |
| 1 | 52 | 29.4 | 96    | 2 | 1 | 2 | 1 | 0 | 0 | 119 | 88 | 72 | 6.1  | 5.7  | 5.9  | 101 | 18 | 0.9  | 173 | 173 | 50 | 108 | 5.6 | 0 |
| 2 | 52 | 21.0 | 79    | 1 | 1 | 1 | 0 | 0 | 1 | 125 | 82 | 71 | 6.9  | 7    | 6.95 | 118 | 13 | 0.63 | 284 | 101 | 71 | 201 | 5.9 | 1 |
| 1 | 51 | 27.4 | 92    | 2 | 1 | 1 | 0 | 0 | 0 | 118 | 77 | 56 | 7.7  | 7.9  | 7.8  | 100 | 18 | 0.95 | 145 | 145 | 40 | 85  | 5.4 | 0 |
| 1 | 49 | 26.4 | 91    | 2 | 2 | 1 | 0 | 0 | 1 | 123 | 80 | 78 | 7.4  | 7.3  | 7.35 | 80  | 12 | 0.91 | 250 | 104 | 45 | 112 | 5.3 | 0 |
| 1 | 64 | 32.9 | 104.5 | 2 | 1 | 1 | 1 | 0 | 1 | 106 | 66 | 47 | 6.7  | 6.9  | 6.8  | 103 | 15 | 0.96 | 113 | 113 | 51 | 59  | 5.2 | 0 |
| 1 | 58 | 25.4 | 88    | 2 | 2 | 1 | 1 | 0 | 1 | 142 | 92 | 69 | 9.1  | 8.7  | 8.9  | 100 | 10 | 0.77 | 160 | 160 | 57 | 89  | 5.9 | 1 |
| 1 | 50 | 29.4 | 104   | 2 | 1 | 1 | 1 | 0 | 1 | 124 | 92 | 58 | 8    | 7.4  | 7.7  | 111 | 13 | 0.82 | 255 | 255 | 33 | 86  | 5.4 | 1 |
| 1 | 57 | 26.8 | 93    | 1 | 1 | 2 | 1 | 1 | 1 | 135 | 87 | 49 | 7.6  | 7.6  | 7.6  | 101 | 20 | 1.11 | 138 | 138 | 35 | 78  | 5.6 | 1 |
| 1 | 59 | 27.0 | 89.3  | 1 | 1 | 2 | 0 | 1 | 1 | 133 | 87 | 53 | 7.5  | 7.3  | 7.4  | 127 | 16 | 0.86 | 192 | 97  | 48 | 129 | 6.8 | 0 |
| 1 | 48 | 22.8 | 87    | 1 | 2 | 1 | 0 | 0 | 1 | 131 | 87 | 57 | 7.3  | 8    | 7.65 | 121 | 16 | 1.26 | 170 | 190 | 39 | 104 | 5.4 | 0 |
| 1 | 48 | 26.0 | 91    | 2 | 1 | 2 | 0 | 0 | 0 | 127 | 79 | 58 | 7.4  | 7.3  | 7.35 | 85  | 14 | 0.94 | 210 | 101 | 98 | 99  | 5.1 | 1 |
| 1 | 47 | 22.9 | 87.6  | 2 | 1 | 2 | 0 | 0 | 1 | 114 | 68 | 66 | 8.1  | 7.9  | 8    | 101 | 17 | 1.1  | 258 | 142 | 69 | 174 | 5.6 | 1 |
| 1 | 74 | 22.1 | 80    | 2 | 2 | 1 | 1 | 1 | 0 | 144 | 81 | 52 | 9.6  | 9.5  | 9.55 | 147 | 17 | 0.96 | 172 | 63  | 59 | 105 | 7.7 | 1 |
| 1 | 68 | 30.5 | 104   | 2 | 1 | 1 | 1 | 1 | 1 | 146 | 79 | 84 | 13.5 | 11.9 | 12.7 | 189 | 12 | 1.01 | 125 | 133 | 38 | 74  | 9.5 | 1 |
| 1 | 57 | 26.4 | 88.5  | 2 | 2 | 2 | 0 | 0 | 0 | 136 | 89 | 63 | 7.3  | 7.2  | 7.25 | 111 | 20 | 0.74 | 179 | 139 | 42 | 117 | 5.6 | 0 |
| 1 | 52 | 22.6 | 89    | 2 | 1 | 1 | 0 | 0 | 0 | 124 | 89 | 71 | 6.9  | 6.9  | 6.9  | 91  | 14 | 0.9  | 163 | 100 | 52 | 90  | 5.4 | 0 |
| 1 | 66 | 27.3 | 93.5  | 2 | 2 | 2 | 1 | 0 | 1 | 135 | 95 | 61 | 9.9  | 9.3  | 9.6  | 101 | 18 | 0.9  | 158 | 293 | 57 | 67  | 5.5 | 1 |
| 2 | 64 | 19.4 | 74    | 1 | 1 | 1 | 0 | 0 | 0 | 108 | 73 | 60 | 7.6  | 7.8  | 7.7  | 95  | 18 | 0.6  | 170 | 74  | 54 | 98  | 5.4 | 0 |
| 1 | 52 | 23.8 | 86.2  | 2 | 1 | 1 | 1 | 0 | 0 | 138 | 88 | 49 | 8.3  | 8.1  | 8.2  | 113 | 21 | 0.96 | 180 | 80  | 48 | 128 | 6   | 1 |
| 2 | 63 | 20.3 | 72    | 1 | 1 | 1 | 1 | 0 | 0 | 138 | 90 | 74 | 7.8  | 7.7  | 7.75 | 96  | 17 | 0.55 | 206 | 58  | 62 | 129 | 5.2 | 1 |
| 1 | 60 | 26.6 | 99    | 2 | 2 | 1 | 1 | 1 | 1 | 130 | 91 | 64 | 7.2  | 7.2  | 7.2  | 112 | 16 | 0.96 | 133 | 81  | 45 | 77  | 6.4 | 0 |
| 1 | 65 | 26.7 | 88    | 2 | 1 | 1 | 1 | 0 | 1 | 127 | 90 | 80 | 7.6  | 7.2  | 7.4  | 106 | 13 | 0.83 | 172 | 60  | 58 | 111 | 5.9 | 0 |
| 1 | 56 | 26.1 | 94    | 2 | 2 | 2 | 1 | 0 | 0 | 139 | 93 | 64 | 7.7  | 7.2  | 7.45 | 100 | 13 | 0.89 | 143 | 93  | 41 | 92  | 5.4 | 1 |
| 1 | 47 | 23.0 | 89    | 2 | 2 | 1 | 1 | 0 | 0 | 142 | 95 | 54 | 8.1  | 8.2  | 8.15 | 88  | 16 | 0.95 | 187 | 51  | 61 | 113 | 5.4 | 1 |
| 2 | 57 | 22.2 | 82    | 1 | 1 | 1 | 1 | 0 | 0 | 147 | 90 | 57 | 7.4  | 7.4  | 7.4  | 85  | 14 | 0.81 | 220 | 88  | 54 | 158 | 5.2 | 1 |

|   |    |      |      |   |   |   |   |   |   |     |     |    |     |      |       |     |    |      |     |     |    |     |     |   |
|---|----|------|------|---|---|---|---|---|---|-----|-----|----|-----|------|-------|-----|----|------|-----|-----|----|-----|-----|---|
| 2 | 53 | 21.8 | 84.2 | 1 | 1 | 1 | 1 | 0 | 1 | 159 | 104 | 60 | 8.7 | 8.2  | 8.45  | 103 | 15 | 0.62 | 288 | 207 | 43 | 209 | 5.9 | 1 |
| 1 | 67 | 23.1 | 85.5 | 2 | 2 | 1 | 1 | 1 | 1 | 116 | 81  | 70 | 9.4 | 8.6  | 9     | 130 | 12 | 0.64 | 181 | 60  | 69 | 105 | 6.5 | 1 |
| 1 | 63 | 17.3 | 67   | 1 | 1 | 2 | 0 | 0 | 0 | 114 | 81  | 74 | 9.5 | 9.1  | 9.3   | 99  | 18 | 0.92 | 159 | 47  | 77 | 86  | 5.4 | 1 |
| 2 | 52 | 20.0 | 76   | 1 | 1 | 1 | 1 | 0 | 0 | 134 | 97  | 59 | 9.8 | 11.1 | 10.45 | 88  | 16 | 0.66 | 129 | 150 | 49 | 58  | 5.7 | 1 |
| 1 | 53 | 21.1 | 85   | 1 | 1 | 1 | 0 | 1 | 1 | 127 | 86  | 69 | 7.2 | 7.6  | 7.4   | 148 | 12 | 0.88 | 142 | 130 | 35 | 84  | 7.4 | 0 |
| 2 | 48 | 19.5 | 74   | 1 | 1 | 2 | 0 | 0 | 0 | 128 | 83  | 56 | 7.2 | 7.2  | 7.2   | 98  | 14 | 0.87 | 204 | 53  | 95 | 103 | 5.8 | 0 |
| 1 | 50 | 27.3 | 94   | 2 | 2 | 2 | 1 | 0 | 0 | 120 | 86  | 63 | 6.7 | 7    | 6.85  | 96  | 19 | 1.28 | 194 | 136 | 67 | 105 | 5.4 | 0 |
| 2 | 52 | 22.2 | 80.5 | 1 | 1 | 1 | 1 | 0 | 1 | 130 | 86  | 64 | 8.3 | 7.5  | 7.9   | 87  | 8  | 0.7  | 145 | 90  | 65 | 67  | 5.2 | 1 |
| 1 | 53 | 25.7 | 89   | 2 | 1 | 1 | 1 | 0 | 0 | 111 | 70  | 56 | 7.6 | 7.9  | 7.75  | 87  | 11 | 1.01 | 171 | 94  | 49 | 104 | 5   | 0 |
| 1 | 52 | 22.4 | 79   | 1 | 1 | 1 | 0 | 0 | 1 | 110 | 73  | 55 | 7.5 | 7.3  | 7.4   | 98  | 12 | 0.98 | 114 | 59  | 31 | 80  | 5.4 | 1 |
| 1 | 60 | 29.7 | 99   | 2 | 2 | 1 | 1 | 1 | 1 | 134 | 86  | 64 | 9.8 | 9.6  | 9.7   | 123 | 22 | 2.1  | 127 | 207 | 41 | 52  | 7   | 1 |
| 2 | 52 | 21.0 | 75.8 | 1 | 1 | 1 | 0 | 0 | 0 | 115 | 67  | 91 | 6.9 | 7    | 6.95  | 98  | 18 | 0.76 | 215 | 56  | 61 | 152 | 5.6 | 0 |
| 2 | 51 | 20.6 | 80   | 1 | 1 | 1 | 0 | 0 | 0 | 118 | 76  | 68 | 6.7 | 6.5  | 6.6   | 102 | 8  | 0.58 | 205 | 64  | 46 | 148 | 5.6 | 1 |
| 1 | 46 | 26.0 | 97   | 2 | 1 | 1 | 1 | 0 | 1 | 139 | 95  | 54 | 7.7 | 7.7  | 7.7   | 106 | 12 | 0.91 | 155 | 142 | 27 | 97  | 5.4 | 1 |
| 2 | 52 | 19.7 | 78   | 1 | 1 | 2 | 0 | 0 | 0 | 126 | 81  | 53 | 8.2 | 8.1  | 8.15  | 94  | 13 | 0.72 | 227 | 52  | 76 | 129 | 5.8 | 1 |
| 1 | 59 | 23.9 | 84   | 2 | 2 | 2 | 0 | 1 | 1 | 125 | 81  | 61 | 7.3 | 7.6  | 7.45  | 116 | 15 | 0.69 | 190 | 54  | 81 | 106 | 5.7 | 1 |
| 2 | 68 | 20.4 | 74   | 1 | 1 | 1 | 0 | 0 | 0 | 114 | 73  | 58 | 9.3 | 9    | 9.15  | 90  | 16 | 0.81 | 168 | 116 | 73 | 117 | 5.4 | 1 |
| 2 | 55 | 21.6 | 75.5 | 1 | 1 | 1 | 0 | 0 | 1 | 108 | 64  | 50 | 6.7 | 6.9  | 6.8   | 86  | 16 | 0.69 | 233 | 59  | 90 | 130 | 5.5 | 1 |
| 1 | 63 | 21.1 | 82   | 1 | 1 | 1 | 0 | 0 | 0 | 119 | 84  | 57 | 9   | 8.9  | 8.95  | 109 | 19 | 0.98 | 203 | 101 | 52 | 128 | 5.3 | 1 |
| 2 | 48 | 21.6 | 70.2 | 1 | 1 | 1 | 0 | 0 | 0 | 127 | 78  | 87 | 6.3 | 6.5  | 6.4   | 104 | 14 | 0.71 | 201 | 146 | 69 | 108 | 5.6 | 0 |
| 1 | 73 | 21.9 | 80   | 2 | 1 | 2 | 0 | 0 | 1 | 124 | 79  | 56 | 8.4 | 8.3  | 8.35  | 98  | 16 | 1.06 | 216 | 43  | 71 | 123 | 6.3 | 1 |
| 1 | 71 | 23.3 | 85   | 1 | 1 | 1 | 0 | 0 | 0 | 131 | 73  | 59 | 8.6 | 8.7  | 8.65  | 82  | 16 | 0.89 | 192 | 38  | 56 | 140 | 5.2 | 0 |
| 1 | 59 | 22.9 | 91   | 1 | 1 | 1 | 0 | 1 | 1 | 118 | 75  | 64 | 8.4 | 8.3  | 8.35  | 111 | 18 | 0.98 | 114 | 73  | 34 | 62  | 7   | 1 |
| 1 | 61 | 24.8 | 88   | 2 | 1 | 2 | 0 | 0 | 0 | 124 | 82  | 58 | 6.8 | 6.8  | 6.8   | 91  | 21 | 0.89 | 224 | 178 | 52 | 137 | 5.4 | 1 |
| 1 | 65 | 27.4 | 98   | 2 | 1 | 1 | 1 | 0 | 0 | 117 | 80  | 55 | 7.5 | 7.4  | 7.45  | 95  | 12 | 0.81 | 159 | 159 | 60 | 91  | 5.4 | 0 |
| 1 | 64 | 25.6 | 97   | 2 | 2 | 1 | 1 | 0 | 0 | 126 | 93  | 60 | 6.1 | 6.1  | 6.1   | 112 | 18 | 0.71 | 182 | 182 | 64 | 107 | 6   | 1 |
| 1 | 66 | 23.5 | 85   | 2 | 1 | 1 | 1 | 0 | 1 | 122 | 78  | 58 | 9.5 | 9.1  | 9.3   | 106 | 25 | 1    | 168 | 168 | 53 | 91  | 5.4 | 1 |
| 1 | 57 | 22.8 | 83   | 2 | 1 | 1 | 1 | 0 | 1 | 145 | 109 | 86 | 9.6 | 9.7  | 9.65  | 100 | 11 | 1.08 | 163 | 163 | 38 | 109 | 5.9 | 0 |
| 2 | 66 | 21.6 | 77   | 1 | 1 | 2 | 0 | 0 | 1 | 127 | 76  | 68 | 9.1 | 9    | 9.05  | 92  | 15 | 0.71 | 222 | 222 | 76 | 127 | 5.7 | 1 |

|   |    |      |      |   |   |   |   |   |   |     |     |    |      |      |      |     |    |      |     |     |    |     |     |   |
|---|----|------|------|---|---|---|---|---|---|-----|-----|----|------|------|------|-----|----|------|-----|-----|----|-----|-----|---|
| 2 | 60 | 23.7 | 87   | 1 | 1 | 2 | 0 | 0 | 1 | 104 | 73  | 57 | 9    | 8.9  | 8.95 | 101 | 18 | 0.76 | 229 | 229 | 67 | 150 | 5.9 | 1 |
| 1 | 48 | 25.9 | 96.5 | 2 | 1 | 1 | 1 | 1 | 1 | 114 | 86  | 80 | 8    | 7.8  | 7.9  | 126 | 13 | 1.21 | 189 | 189 | 39 | 122 | 6.5 | 0 |
| 1 | 74 | 26.6 | 91   | 2 | 2 | 1 | 1 | 0 | 1 | 149 | 92  | 48 | 8.2  | 7.5  | 7.85 | 115 | 16 | 0.84 | 179 | 179 | 57 | 92  | 5.6 | 0 |
| 1 | 53 | 23.4 | 83   | 2 | 1 | 1 | 1 | 0 | 1 | 118 | 87  | 71 | 7.5  | 7.3  | 7.4  | 111 | 11 | 1.05 | 148 | 148 | 41 | 93  | 5.5 | 0 |
| 1 | 51 | 22.5 | 85   | 2 | 1 | 1 | 1 | 0 | 0 | 150 | 88  | 57 | 7.5  | 7.5  | 7.5  | 106 | 16 | 0.8  | 174 | 113 | 44 | 113 | 5.7 | 0 |
| 1 | 67 | 25.0 | 96   | 2 | 1 | 1 | 1 | 0 | 1 | 140 | 85  | 74 | 9.9  | 10   | 9.95 | 103 | 18 | 0.95 | 140 | 140 | 50 | 71  | 5.7 | 1 |
| 1 | 65 | 26.4 | 96   | 2 | 1 | 2 | 1 | 1 | 1 | 140 | 86  | 56 | 7.9  | 7.9  | 7.9  | 165 | 17 | 0.78 | 165 | 94  | 67 | 88  | 7.3 | 1 |
| 1 | 51 | 26.1 | 94   | 2 | 1 | 2 | 1 | 0 | 1 | 122 | 97  | 66 | 8.7  | 8.3  | 8.5  | 107 | 19 | 1.01 | 236 | 236 | 36 | 129 | 5.6 | 1 |
| 2 | 49 | 22.8 | 82   | 2 | 1 | 2 | 1 | 0 | 1 | 159 | 102 | 68 | 7.1  | 6.8  | 6.95 | 125 | 13 | 0.63 | 163 | 293 | 35 | 69  | 5.4 | 1 |
| 1 | 48 | 19.0 | 80   | 2 | 1 | 1 | 1 | 0 | 1 | 104 | 63  | 56 | 9    | 9.3  | 9.15 | 89  | 18 | 0.93 | 224 | 102 | 46 | 166 | 5.4 | 1 |
| 1 | 75 | 22.9 | 89   | 2 | 1 | 1 | 1 | 1 | 1 | 124 | 79  | 63 | 12.1 | 10.9 | 11.5 | 123 | 26 | 0.97 | 147 | 47  | 62 | 84  | 6.5 | 1 |
| 1 | 79 | 21.4 | 87   | 1 | 1 | 2 | 1 | 1 | 1 | 145 | 89  | 93 | 10.3 | 10.5 | 10.4 | 157 | 15 | 0.86 | 108 | 121 | 51 | 42  | 7.2 | 0 |
| 1 | 54 | 23.5 | 80.5 | 2 | 2 | 1 | 1 | 0 | 1 | 123 | 94  | 62 | 8    | 7.4  | 7.7  | 121 | 15 | 0.96 | 226 | 96  | 62 | 149 | 6.3 | 1 |
| 1 | 55 | 24.4 | 89   | 1 | 1 | 1 | 0 | 1 | 1 | 116 | 86  | 70 | 6.8  | 7    | 6.9  | 112 | 22 | 1.29 | 306 | 96  | 51 | 240 | 6.9 | 1 |
| 1 | 73 | 21.9 | 82   | 2 | 1 | 2 | 1 | 1 | 1 | 117 | 63  | 73 | 9.9  | 9.8  | 9.85 | 129 | 17 | 1.01 | 180 | 107 | 61 | 107 | 7.1 | 1 |
| 1 | 59 | 24.5 | 86   | 2 | 1 | 1 | 1 | 0 | 1 | 129 | 99  | 58 | 6.8  | 6.6  | 6.7  | 103 | 23 | 1.18 | 168 | 75  | 53 | 108 | 5.8 | 0 |
| 1 | 38 | 25.3 | 89   | 2 | 1 | 2 | 1 | 0 | 0 | 120 | 78  | 63 | 6    | 5.9  | 5.95 | 97  | 15 | 0.79 | 163 | 52  | 56 | 106 | 5   | 1 |
| 1 | 50 | 29.4 | 106  | 2 | 1 | 2 | 1 | 0 | 1 | 132 | 83  | 56 | 7.1  | 7.2  | 7.15 | 89  | 10 | 0.75 | 151 | 144 | 49 | 88  | 5.9 | 1 |
| 2 | 51 | 21.8 | 75   | 1 | 1 | 1 | 0 | 0 | 0 | 116 | 75  | 71 | 6.9  | 7.2  | 7.05 | 98  | 10 | 0.66 | 216 | 38  | 66 | 155 | 5.8 | 1 |
| 2 | 50 | 27.0 | 88   | 1 | 1 | 2 | 0 | 0 | 1 | 135 | 79  | 65 | 6.4  | 6.2  | 6.3  | 103 | 15 | 0.68 | 207 | 261 | 53 | 111 | 5.5 | 0 |
| 2 | 66 | 24.3 | 81   | 1 | 1 | 1 | 1 | 0 | 1 | 139 | 90  | 66 | 9.3  | 8.7  | 9    | 87  | 13 | 0.66 | 170 | 118 | 61 | 98  | 6   | 1 |
| 1 | 58 | 27.0 | 90.5 | 2 | 2 | 2 | 0 | 0 | 1 | 122 | 89  | 73 | 6.9  | 6.3  | 6.6  | 91  | 21 | 0.91 | 211 | 99  | 61 | 128 | 5.1 | 0 |
| 2 | 47 | 22.0 | 72   | 1 | 1 | 1 | 0 | 0 | 1 | 100 | 68  | 72 | 6.8  | 6.9  | 6.85 | 88  | 14 | 0.62 | 261 | 46  | 63 | 178 | 5.4 | 0 |
| 1 | 73 | 27.3 | 94   | 2 | 2 | 2 | 1 | 1 | 0 | 135 | 85  | 66 | 9.8  | 10.2 | 10   | 133 | 13 | 0.76 | 201 | 105 | 60 | 129 | 6.5 | 1 |
| 2 | 54 | 18.8 | 76   | 1 | 1 | 2 | 0 | 0 | 0 | 126 | 87  | 45 | 8.1  | 8    | 8.05 | 88  | 14 | 0.68 | 203 | 79  | 58 | 127 | 5.3 | 1 |
| 2 | 63 | 21.8 | 88.5 | 1 | 1 | 2 | 0 | 0 | 1 | 110 | 68  | 59 | 8.3  | 8    | 8.15 | 103 | 14 | 0.56 | 175 | 139 | 64 | 94  | 5.8 | 1 |
| 1 | 54 | 20.3 | 77   | 1 | 1 | 2 | 1 | 0 | 0 | 121 | 84  | 68 | 8.8  | 9.1  | 8.95 | 113 | 10 | 0.78 | 212 | 130 | 49 | 134 | 5.9 | 0 |
| 1 | 60 | 23.5 | 79.6 | 2 | 1 | 2 | 1 | 0 | 1 | 129 | 85  | 63 | 8    | 6.9  | 7.45 | 94  | 12 | 1.11 | 209 | 53  | 62 | 88  | 5.4 | 1 |
| 2 | 61 | 23.1 | 91.5 | 1 | 1 | 1 | 0 | 0 | 1 | 137 | 79  | 57 | 8.7  | 8.4  | 8.55 | 101 | 12 | 0.62 | 184 | 99  | 69 | 102 | 5.8 | 1 |

|   |    |      |       |   |   |   |   |   |   |     |    |    |      |     |      |     |    |      |     |     |     |     |     |   |
|---|----|------|-------|---|---|---|---|---|---|-----|----|----|------|-----|------|-----|----|------|-----|-----|-----|-----|-----|---|
| 1 | 64 | 24.0 | 88    | 1 | 1 | 1 | 1 | 1 | 1 | 140 | 88 | 51 | 8.6  | 8.9 | 8.75 | 139 | 13 | 0.78 | 179 | 92  | 50  | 113 | 6.9 | 1 |
| 2 | 69 | 24.1 | 84    | 1 | 1 | 1 | 1 | 0 | 1 | 132 | 78 | 68 | 10.8 | 11  | 10.9 | 105 | 12 | 0.76 | 192 | 65  | 64  | 120 | 6.3 | 1 |
| 1 | 49 | 24.7 | 82.8  | 1 | 2 | 1 | 0 | 0 | 0 | 136 | 85 | 71 | 7.5  | 7.4 | 7.45 | 99  | 8  | 0.84 | 155 | 63  | 70  | 76  | 5.1 | 1 |
| 1 | 45 | 23.1 | 86.5  | 2 | 1 | 2 | 0 | 0 | 1 | 130 | 80 | 68 | 7.3  | 7.1 | 7.2  | 107 | 13 | 0.81 | 195 | 133 | 35  | 142 | 5.3 | 0 |
| 1 | 66 | 21.7 | 82    | 1 | 1 | 1 | 0 | 0 | 1 | 123 | 86 | 57 | 8.1  | 8.1 | 8.1  | 89  | 17 | 0.97 | 133 | 64  | 45  | 82  | 5.7 | 1 |
| 2 | 71 | 23.2 | 83    | 1 | 1 | 1 | 1 | 0 | 1 | 140 | 75 | 73 | 9.7  | 9.5 | 9.6  | 94  | 10 | 0.49 | 191 | 212 | 48  | 114 | 5.7 | 1 |
| 1 | 52 | 23.4 | 90    | 1 | 2 | 1 | 1 | 0 | 0 | 120 | 85 | 73 | 7.5  | 7   | 7.25 | 88  | 15 | 0.93 | 191 | 79  | 56  | 127 | 5.6 | 0 |
| 1 | 49 | 22.7 | 83    | 1 | 1 | 2 | 1 | 0 | 1 | 136 | 94 | 81 | 7.3  | 7.5 | 7.4  | 110 | 11 | 1.02 | 254 | 42  | 57  | 179 | 5.7 | 1 |
| 2 | 60 | 21.4 | 79    | 1 | 1 | 1 | 0 | 0 | 1 | 124 | 79 | 62 | 8.4  | 8.9 | 8.65 | 89  | 14 | 0.69 | 249 | 145 | 57  | 153 | 5.7 | 1 |
| 1 | 57 | 21.5 | 81    | 2 | 1 | 1 | 1 | 0 | 0 | 120 | 78 | 49 | 7.9  | 8.1 | 8    | 96  | 12 | 0.82 | 165 | 40  | 55  | 103 | 5.4 | 1 |
| 1 | 48 | 23.6 | 89    | 2 | 1 | 1 | 0 | 0 | 0 | 113 | 63 | 47 | 8.2  | 8   | 8.1  | 93  | 11 | 0.98 | 203 | 51  | 58  | 127 | 5.4 | 0 |
| 1 | 47 | 26.5 | 92.9  | 2 | 1 | 1 | 1 | 0 | 1 | 127 | 83 | 68 | 8    | 7.8 | 7.9  | 116 | 15 | 0.96 | 239 | 142 | 43  | 173 | 5.4 | 1 |
| 2 | 77 | 22.4 | 83    | 1 | 1 | 1 | 1 | 0 | 1 | 144 | 86 | 62 | 9    | 8.8 | 8.9  | 90  | 19 | 0.9  | 201 | 122 | 96  | 89  | 5.6 | 0 |
| 1 | 66 | 28.0 | 102   | 2 | 2 | 2 | 1 | 0 | 1 | 148 | 92 | 56 | 8    | 8.1 | 8.05 | 115 | 14 | 0.8  | 162 | 54  | 34  | 117 | 6.1 | 0 |
| 1 | 56 | 23.6 | 80    | 2 | 1 | 1 | 0 | 1 | 0 | 134 | 86 | 68 | 10.7 | 9.7 | 10.2 | 246 | 20 | 0.98 | 178 | 76  | 102 | 68  | 7.3 | 0 |
| 1 | 52 | 24.9 | 91    | 2 | 1 | 1 | 0 | 1 | 1 | 118 | 81 | 60 | 7.7  | 7.7 | 7.7  | 117 | 18 | 0.79 | 159 | 94  | 46  | 96  | 6.5 | 0 |
| 1 | 75 | 22.9 | 88    | 1 | 1 | 2 | 1 | 0 | 1 | 133 | 79 | 51 | 8.5  | 8.6 | 8.55 | 91  | 25 | 0.93 | 172 | 89  | 59  | 102 | 5.4 | 1 |
| 2 | 64 | 29.1 | 99    | 1 | 1 | 1 | 0 | 0 | 1 | 125 | 79 | 60 | 7.3  | 7.5 | 7.4  | 85  | 11 | 0.56 | 126 | 86  | 42  | 75  | 5.7 | 1 |
| 1 | 58 | 25.2 | 87.5  | 1 | 2 | 1 | 1 | 0 | 0 | 122 | 86 | 62 | 7.3  | 7.4 | 7.35 | 112 | 16 | 1.08 | 161 | 86  | 55  | 98  | 5.6 | 0 |
| 1 | 57 | 22.9 | 91    | 1 | 1 | 1 | 0 | 0 | 0 | 116 | 79 | 59 | 8    | 7.9 | 7.95 | 99  | 13 | 0.95 | 174 | 88  | 41  | 112 | 5.7 | 1 |
| 1 | 58 | 26.5 | 93    | 2 | 2 | 2 | 1 | 0 | 1 | 133 | 82 | 47 | 7.9  | 7.8 | 7.85 | 112 | 16 | 1.01 | 197 | 153 | 38  | 129 | 6.1 | 1 |
| 1 | 66 | 23.5 | 104.7 | 2 | 1 | 2 | 1 | 0 | 1 | 147 | 96 | 90 | 8.7  | 9   | 8.85 | 113 | 15 | 0.95 | 161 | 76  | 48  | 109 | 5.9 | 1 |
| 2 | 63 | 21.2 | 76    | 1 | 1 | 1 | 1 | 0 | 0 | 107 | 67 | 51 | 9.8  | 9.8 | 9.8  | 91  | 14 | 0.7  | 188 | 69  | 60  | 117 | 5.4 | 1 |
| 1 | 63 | 26.3 | 90    | 2 | 2 | 1 | 1 | 0 | 0 | 137 | 90 | 59 | 8    | 7.9 | 7.95 | 98  | 16 | 1.03 | 178 | 171 | 43  | 113 | 5.6 | 1 |
| 2 | 58 | 19.6 | 72    | 1 | 1 | 1 | 1 | 0 | 0 | 125 | 84 | 64 | 8.5  | 8.4 | 8.45 | 87  | 11 | 0.62 | 178 | 85  | 63  | 102 | 5.9 | 1 |
| 1 | 56 | 24.8 | 84.5  | 2 | 1 | 1 | 1 | 0 | 0 | 112 | 81 | 65 | 7    | 6.9 | 6.95 | 90  | 19 | 0.93 | 186 | 71  | 56  | 113 | 5.5 | 1 |
| 1 | 53 | 24.8 | 90    | 2 | 1 | 2 | 0 | 0 | 1 | 119 | 77 | 59 | 8    | 7.6 | 7.8  | 100 | 13 | 1.05 | 245 | 123 | 58  | 160 | 5.4 | 1 |
| 1 | 61 | 25.4 | 96    | 1 | 2 | 1 | 1 | 0 | 1 | 141 | 90 | 58 | 9.3  | 9   | 9.15 | 102 | 18 | 0.94 | 226 | 72  | 76  | 139 | 5.8 | 1 |
| 1 | 58 | 27.5 | 101   | 2 | 2 | 1 | 1 | 0 | 0 | 112 | 73 | 52 | 8.1  | 8.2 | 8.15 | 100 | 23 | 1.05 | 103 | 58  | 41  | 54  | 5.9 | 0 |



|   |    |      |      |   |   |   |   |   |   |     |     |    |      |      |       |     |    |      |     |     |    |     |     |   |
|---|----|------|------|---|---|---|---|---|---|-----|-----|----|------|------|-------|-----|----|------|-----|-----|----|-----|-----|---|
| 1 | 60 | 28.0 | 94   | 1 | 2 | 1 | 1 | 0 | 1 | 155 | 97  | 54 | 9.2  | 8.4  | 8.8   | 96  | 21 | 0.96 | 188 | 205 | 36 | 126 | 5.8 | 1 |
| 1 | 45 | 23.0 | 87   | 2 | 1 | 1 | 0 | 0 | 0 | 130 | 85  | 79 | 6.7  | 6.4  | 6.55  | 99  | 15 | 0.95 | 218 | 123 | 69 | 129 | 5.2 | 0 |
| 1 | 67 | 23.3 | 91.5 | 2 | 1 | 1 | 1 | 1 | 1 | 185 | 108 | 71 | 10   | 10.1 | 10.05 | 134 | 18 | 1.14 | 134 | 89  | 40 | 94  | 6.2 | 1 |
| 1 | 74 | 23.6 | 88   | 2 | 1 | 1 | 0 | 1 | 1 | 119 | 73  | 66 | 9.3  | 9.1  | 9.2   | 178 | 14 | 0.92 | 167 | 143 | 49 | 92  | 6.3 | 1 |
| 2 | 56 | 23.2 | 82.2 | 2 | 2 | 1 | 0 | 0 | 0 | 116 | 75  | 69 | 7    | 7.1  | 7.05  | 102 | 18 | 0.71 | 179 | 90  | 45 | 118 | 5.5 | 1 |
| 1 | 56 | 24.8 | 90   | 2 | 2 | 2 | 1 | 0 | 1 | 128 | 87  | 68 | 8.8  | 8.1  | 8.45  | 103 | 13 | 0.87 | 184 | 69  | 52 | 126 | 5.6 | 0 |
| 1 | 47 | 22.6 | 80   | 2 | 1 | 2 | 0 | 0 | 0 | 120 | 83  | 61 | 7.8  | 8.2  | 8     | 97  | 10 | 0.87 | 196 | 149 | 49 | 121 | 5.9 | 1 |
| 1 | 73 | 23.0 | 88   | 2 | 2 | 1 | 1 | 0 | 1 | 117 | 78  | 73 | 8.7  | 8.6  | 8.65  | 104 | 10 | 0.98 | 136 | 109 | 43 | 83  | 5.8 | 1 |
| 1 | 36 | 25.2 | 96.5 | 2 | 1 | 1 | 0 | 0 | 0 | 130 | 87  | 63 | 6.5  | 6.6  | 6.55  | 99  | 11 | 0.66 | 163 | 84  | 48 | 114 | 5.3 | 1 |
| 1 | 58 | 18.1 | 75   | 2 | 2 | 2 | 0 | 0 | 0 | 116 | 76  | 76 | 8.5  | 8.3  | 8.4   | 78  | 14 | 0.74 | 231 | 47  | 85 | 138 | 5.2 | 1 |
| 1 | 55 | 24.7 | 82   | 2 | 1 | 2 | 1 | 0 | 1 | 128 | 91  | 61 | 7.2  | 7.4  | 7.3   | 85  | 12 | 1.07 | 142 | 139 | 38 | 90  | 5.2 | 1 |
| 2 | 71 | 25.1 | 88   | 1 | 1 | 1 | 1 | 1 | 1 | 133 | 80  | 63 | 9.1  | 9.1  | 9.1   | 103 | 13 | 0.69 | 158 | 128 | 57 | 81  | 6   | 1 |
| 1 | 58 | 25.6 | 91   | 2 | 2 | 1 | 1 | 0 | 0 | 139 | 92  | 56 | 7.2  | 7.1  | 7.15  | 100 | 19 | 0.92 | 178 | 58  | 78 | 100 | 5.4 | 1 |
| 1 | 67 | 21.6 | 87   | 2 | 1 | 2 | 1 | 0 | 1 | 189 | 117 | 80 | 10.7 | 10.3 | 10.5  | 119 | 16 | 1.01 | 179 | 167 | 55 | 98  | 5.8 | 0 |
| 2 | 58 | 20.7 | 81   | 1 | 1 | 2 | 1 | 0 | 0 | 108 | 73  | 63 | 8.4  | 8.2  | 8.3   | 108 | 15 | 0.62 | 176 | 66  | 66 | 108 | 5.3 | 0 |
| 2 | 58 | 23.6 | 87   | 1 | 1 | 1 | 1 | 0 | 0 | 130 | 73  | 72 | 7.5  | 7.6  | 7.55  | 100 | 16 | 0.75 | 174 | 111 | 52 | 100 | 5.6 | 0 |
| 1 | 51 | 19.3 | 70   | 1 | 1 | 2 | 0 | 0 | 0 | 110 | 67  | 57 | 7.4  | 7.4  | 7.4   | 83  | 10 | 1.04 | 182 | 72  | 61 | 108 | 5.3 | 1 |
| 1 | 51 | 25.1 | 92   | 2 | 1 | 2 | 1 | 0 | 1 | 118 | 81  | 56 | 6.9  | 6.7  | 6.8   | 124 | 14 | 0.79 | 175 | 87  | 63 | 107 | 5.9 | 0 |
| 1 | 31 | 24.0 | 89.5 | 2 | 2 | 2 | 0 | 0 | 0 | 116 | 74  | 60 | 6.4  | 6.2  | 6.3   | 90  | 12 | 0.8  | 187 | 90  | 70 | 115 | 5.4 | 0 |
| 2 | 55 | 22.5 | 79   | 1 | 1 | 2 | 1 | 0 | 0 | 155 | 98  | 54 | 7.2  | 7.3  | 7.25  | 100 | 13 | 0.58 | 231 | 57  | 90 | 128 | 5.2 | 0 |
| 1 | 62 | 25.7 | 92   | 2 | 1 | 2 | 0 | 0 | 0 | 118 | 79  | 52 | 7.8  | 7.5  | 7.65  | 89  | 17 | 0.94 | 168 | 107 | 44 | 113 | 5.5 | 1 |
| 1 | 72 | 21.5 | 88   | 2 | 1 | 1 | 1 | 0 | 1 | 101 | 66  | 64 | 7.6  | 7.9  | 7.75  | 89  | 16 | 1.05 | 208 | 260 | 34 | 124 | 5.9 | 1 |
| 2 | 70 | 21.0 | 75.5 | 1 | 1 | 1 | 1 | 0 | 1 | 143 | 89  | 62 | 8.1  | 8.2  | 8.15  | 118 | 24 | 0.7  | 157 | 143 | 51 | 92  | 6.1 | 0 |
| 2 | 66 | 30.5 | 105  | 1 | 1 | 1 | 1 | 1 | 1 | 125 | 79  | 71 | 7.3  | 7.1  | 7.2   | 103 | 12 | 0.66 | 137 | 138 | 49 | 56  | 6.5 | 0 |
| 1 | 68 | 22.5 | 86   | 1 | 1 | 2 | 1 | 0 | 0 | 133 | 85  | 64 | 7    | 7.4  | 7.2   | 109 | 16 | 1.03 | 202 | 74  | 71 | 121 | 5.4 | 0 |
| 2 | 62 | 20.8 | 79   | 1 | 1 | 1 | 0 | 0 | 1 | 126 | 87  | 57 | 9.2  | 8.3  | 8.75  | 109 | 11 | 0.61 | 245 | 131 | 48 | 177 | 6   | 1 |
| 1 | 61 | 24.6 | 92   | 2 | 2 | 2 | 0 | 0 | 0 | 118 | 85  | 56 | 9.1  | 9.3  | 9.2   | 99  | 13 | 0.85 | 184 | 88  | 59 | 110 | 5.5 | 1 |
| 1 | 69 | 21.5 | 78   | 2 | 1 | 2 | 1 | 0 | 0 | 137 | 94  | 66 | 9.9  | 9.4  | 9.65  | 93  | 25 | 0.98 | 134 | 124 | 40 | 71  | 5.8 | 1 |
| 1 | 59 | 25.5 | 85   | 1 | 1 | 1 | 1 | 0 | 0 | 158 | 114 | 87 | 8.7  | 7.7  | 8.2   | 106 | 17 | 1.03 | 188 | 104 | 46 | 129 | 5.6 | 0 |

|   |    |      |      |   |   |   |   |   |   |     |     |    |     |      |       |     |    |      |     |     |    |     |     |   |
|---|----|------|------|---|---|---|---|---|---|-----|-----|----|-----|------|-------|-----|----|------|-----|-----|----|-----|-----|---|
| 1 | 55 | 28.1 | 92   | 1 | 1 | 1 | 0 | 0 | 1 | 129 | 83  | 58 | 7.7 | 7.5  | 7.6   | 100 | 14 | 1.01 | 258 | 85  | 77 | 164 | 5.6 | 1 |
| 1 | 49 | 23.2 | 83   | 2 | 2 | 2 | 0 | 0 | 0 | 120 | 82  | 72 | 8.2 | 8.2  | 8.2   | 91  | 16 | 1.04 | 197 | 130 | 46 | 125 | 5.4 | 1 |
| 1 | 58 | 24.4 | 92.8 | 1 | 2 | 2 | 1 | 0 | 0 | 130 | 93  | 74 | 8.6 | 9    | 8.8   | 98  | 14 | 0.87 | 225 | 94  | 47 | 156 | 5.5 | 0 |
| 2 | 76 | 23.0 | 79.5 | 1 | 1 | 1 | 0 | 0 | 0 | 131 | 84  | 56 | 10  | 9.4  | 9.7   | 93  | 31 | 0.6  | 228 | 45  | 83 | 140 | 5.6 | 1 |
| 1 | 54 | 23.1 | 86   | 2 | 1 | 1 | 0 | 0 | 0 | 125 | 87  | 63 | 8.6 | 8.4  | 8.5   | 111 | 13 | 0.89 | 215 | 112 | 61 | 127 | 5.6 | 1 |
| 1 | 56 | 23.5 | 83   | 1 | 1 | 1 | 0 | 0 | 1 | 108 | 76  | 65 | 7.8 | 7.5  | 7.65  | 98  | 17 | 0.99 | 182 | 251 | 31 | 102 | 5.5 | 0 |
| 1 | 56 | 24.9 | 84   | 2 | 2 | 2 | 0 | 0 | 1 | 117 | 80  | 60 | 8.1 | 7.9  | 8     | 104 | 14 | 1    | 180 | 411 | 32 | 87  | 5.5 | 1 |
| 1 | 66 | 23.0 | 84   | 1 | 1 | 2 | 1 | 0 | 1 | 142 | 93  | 62 | 9   | 9    | 9     | 108 | 13 | 1.22 | 223 | 68  | 60 | 162 | 6.4 | 1 |
| 2 | 53 | 22.3 | 79   | 1 | 1 | 2 | 0 | 0 | 0 | 107 | 73  | 74 | 7.2 | 7.1  | 7.15  | 87  | 15 | 0.8  | 233 | 57  | 55 | 159 | 5.9 | 1 |
| 1 | 67 | 24.9 | 91   | 2 | 1 | 2 | 1 | 0 | 1 | 141 | 86  | 53 | 8.3 | 8.3  | 8.3   | 95  | 14 | 1.1  | 126 | 70  | 50 | 76  | 5.6 | 1 |
| 2 | 43 | 20.7 | 81   | 1 | 1 | 2 | 0 | 0 | 0 | 116 | 76  | 62 | 6.2 | 6.2  | 6.2   | 91  | 9  | 0.65 | 198 | 56  | 66 | 119 | 5.3 | 1 |
| 1 | 60 | 22.7 | 91   | 1 | 1 | 2 | 1 | 0 | 1 | 153 | 102 | 78 | 10  | 10.1 | 10.05 | 101 | 13 | 0.84 | 144 | 60  | 65 | 66  | 5.5 | 1 |
| 1 | 55 | 23.4 | 85   | 1 | 1 | 2 | 0 | 0 | 0 | 114 | 78  | 67 | 8.4 | 7.9  | 8.15  | 98  | 17 | 1.04 | 202 | 66  | 77 | 115 | 5.4 | 1 |
| 2 | 66 | 21.0 | 74   | 1 | 1 | 2 | 0 | 0 | 0 | 113 | 71  | 61 | 8.8 | 8.7  | 8.75  | 93  | 15 | 0.66 | 212 | 69  | 75 | 122 | 5.4 | 0 |
| 1 | 55 | 23.4 | 88.8 | 2 | 1 | 2 | 0 | 0 | 0 | 98  | 61  | 64 | 7.9 | 8    | 7.95  | 98  | 16 | 1.29 | 221 | 116 | 48 | 143 | 5.4 | 1 |
| 1 | 68 | 27.4 | 100  | 1 | 1 | 1 | 1 | 0 | 1 | 137 | 86  | 63 | 9.8 | 9    | 9.4   | 102 | 18 | 0.78 | 119 | 77  | 44 | 71  | 5.9 | 1 |
| 1 | 50 | 26.2 | 88.8 | 1 | 1 | 2 | 0 | 0 | 1 | 116 | 78  | 60 | 7.3 | 7.3  | 7.3   | 99  | 10 | 0.98 | 212 | 98  | 61 | 125 | 5.4 | 1 |
| 1 | 51 | 24.6 | 86   | 2 | 1 | 2 | 0 | 0 | 1 | 129 | 84  | 64 | 7.5 | 7.4  | 7.45  | 102 | 13 | 0.94 | 176 | 100 | 64 | 94  | 6.1 | 1 |
| 1 | 59 | 28.4 | 96.5 | 2 | 1 | 2 | 0 | 0 | 1 | 129 | 79  | 49 | 8.2 | 8.1  | 8.15  | 122 | 17 | 0.81 | 230 | 138 | 42 | 168 | 6.4 | 1 |
| 1 | 54 | 24.1 | 87.5 | 2 | 1 | 2 | 0 | 0 | 1 | 120 | 79  | 60 | 8.1 | 7.9  | 8     | 91  | 13 | 1.07 | 190 | 215 | 41 | 122 | 5.8 | 1 |
| 1 | 56 | 22.9 | 82   | 2 | 1 | 1 | 0 | 0 | 0 | 130 | 82  | 57 | 7.9 | 7.7  | 7.8   | 118 | 16 | 0.81 | 167 | 59  | 49 | 103 | 5.8 | 1 |
| 1 | 48 | 25.3 | 88   | 2 | 1 | 2 | 0 | 0 | 0 | 103 | 71  | 53 | 8   | 7.8  | 7.9   | 88  | 12 | 0.75 | 167 | 142 | 51 | 91  | 5.9 | 1 |
| 1 | 46 | 29.7 | 96.5 | 1 | 1 | 1 | 1 | 1 | 1 | 162 | 103 | 90 | 9.2 | 11.5 | 10.35 | 201 | 19 | 1.46 | 199 | 314 | 39 | 110 | 8.6 | 1 |
| 1 | 41 | 25.6 | 84   | 2 | 2 | 2 | 1 | 0 | 1 | 148 | 92  | 74 | 7.2 | 6.9  | 7.05  | 97  | 14 | 1.14 | 251 | 304 | 50 | 159 | 5.4 | 0 |
| 1 | 50 | 22.9 | 86.5 | 2 | 1 | 2 | 0 | 0 | 0 | 115 | 82  | 64 | 9.3 | 9.2  | 9.25  | 98  | 16 | 0.86 | 234 | 118 | 50 | 158 | 5.5 | 0 |
| 1 | 47 | 23.9 | 81.5 | 2 | 2 | 1 | 0 | 0 | 1 | 120 | 81  | 62 | 7.4 | 7.2  | 7.3   | 110 | 16 | 0.93 | 224 | 249 | 60 | 126 | 5.8 | 1 |
| 1 | 51 | 22.7 | 81.5 | 2 | 1 | 1 | 1 | 0 | 0 | 140 | 95  | 66 | 7.1 | 6.9  | 7     | 87  | 12 | 0.96 | 228 | 149 | 48 | 153 | 5.7 | 1 |
| 1 | 60 | 23.4 | 79   | 2 | 2 | 2 | 1 | 0 | 0 | 130 | 88  | 65 | 7.7 | 8    | 7.85  | 108 | 13 | 0.88 | 160 | 80  | 54 | 103 | 5.8 | 0 |
| 1 | 58 | 24.7 | 95   | 2 | 1 | 2 | 0 | 0 | 0 | 116 | 80  | 64 | 7   | 7    | 7     | 101 | 11 | 0.8  | 207 | 164 | 58 | 134 | 6   | 1 |

|   |    |      |      |   |   |   |   |   |   |     |     |     |      |     |      |     |    |      |     |     |     |     |     |   |
|---|----|------|------|---|---|---|---|---|---|-----|-----|-----|------|-----|------|-----|----|------|-----|-----|-----|-----|-----|---|
| 1 | 54 | 21.4 | 86.5 | 2 | 1 | 1 | 0 | 0 | 0 | 100 | 72  | 59  | 7.1  | 7.1 | 7.1  | 98  | 10 | 0.87 | 142 | 64  | 75  | 67  | 5.4 | 1 |
| 2 | 66 | 22.3 | 74   | 1 | 1 | 1 | 0 | 0 | 0 | 107 | 73  | 55  | 7.2  | 7.2 | 7.2  | 87  | 16 | 0.67 | 198 | 63  | 71  | 115 | 5.4 | 1 |
| 1 | 59 | 26.1 | 91.5 | 2 | 2 | 2 | 1 | 0 | 1 | 110 | 81  | 61  | 7.2  | 6.9 | 7.05 | 100 | 18 | 0.83 | 159 | 169 | 39  | 103 | 5.1 | 0 |
| 1 | 77 | 27.1 | 91   | 2 | 1 | 2 | 1 | 0 | 1 | 155 | 80  | 58  | 9.6  | 9.6 | 9.6  | 118 | 15 | 1.04 | 126 | 103 | 46  | 69  | 5.9 | 1 |
| 1 | 49 | 22.8 | 78.2 | 2 | 1 | 1 | 0 | 0 | 0 | 128 | 88  | 57  | 6.8  | 6.9 | 6.85 | 94  | 16 | 1.07 | 234 | 55  | 69  | 153 | 5.3 | 0 |
| 1 | 58 | 24.9 | 85   | 2 | 1 | 2 | 1 | 0 | 0 | 130 | 91  | 63  | 7.6  | 7.6 | 7.6  | 103 | 11 | 0.99 | 103 | 108 | 55  | 136 | 5.6 | 1 |
| 1 | 51 | 25.3 | 93   | 2 | 2 | 1 | 0 | 0 | 0 | 131 | 86  | 54  | 8    | 8.1 | 8.05 | 99  | 10 | 0.84 | 195 | 106 | 52  | 119 | 5.5 | 0 |
| 1 | 60 | 17.0 | 64.5 | 1 | 1 | 1 | 1 | 0 | 0 | 132 | 90  | 118 | 8.7  | 9   | 8.85 | 118 | 14 | 1.08 | 172 | 66  | 84  | 89  | 5.8 | 0 |
| 1 | 58 | 23.6 | 88.5 | 2 | 2 | 2 | 1 | 0 | 0 | 109 | 76  | 71  | 6.6  | 6.6 | 6.6  | 96  | 13 | 0.84 | 201 | 73  | 68  | 123 | 5   | 0 |
| 1 | 43 | 26.9 | 98   | 1 | 1 | 1 | 0 | 0 | 1 | 116 | 84  | 62  | 6.9  | 6.7 | 6.8  | 94  | 16 | 1.15 | 206 | 136 | 55  | 143 | 5   | 0 |
| 1 | 50 | 22.4 | 78   | 1 | 1 | 1 | 0 | 0 | 0 | 117 | 81  | 64  | 7.9  | 7.9 | 7.9  | 98  | 12 | 0.69 | 176 | 68  | 63  | 102 | 5.1 | 1 |
| 1 | 58 | 23.4 | 86.5 | 2 | 2 | 2 | 0 | 0 | 1 | 128 | 79  | 62  | 10.1 | 9.1 | 9.6  | 109 | 17 | 1.11 | 141 | 122 | 57  | 80  | 6.4 | 1 |
| 1 | 53 | 22.2 | 86   | 2 | 2 | 2 | 1 | 0 | 1 | 130 | 82  | 94  | 9.4  | 8.6 | 9    | 109 | 10 | 0.78 | 155 | 272 | 50  | 81  | 6   | 0 |
| 1 | 60 | 23.7 | 95.5 | 2 | 2 | 2 | 0 | 0 | 0 | 129 | 83  | 63  | 6.8  | 7   | 6.9  | 106 | 11 | 1.07 | 235 | 169 | 60  | 152 | 5.7 | 0 |
| 1 | 53 | 22.5 | 86   | 1 | 1 | 1 | 0 | 0 | 1 | 126 | 88  | 72  | 7.6  | 7.6 | 7.6  | 99  | 12 | 0.93 | 201 | 65  | 60  | 130 | 5.8 | 1 |
| 1 | 41 | 24.9 | 88   | 2 | 2 | 2 | 1 | 1 | 1 | 120 | 88  | 58  | 6.9  | 7.1 | 7    | 171 | 15 | 1.35 | 199 | 254 | 36  | 116 | 6.5 | 1 |
| 1 | 72 | 24.8 | 86   | 1 | 1 | 1 | 1 | 1 | 1 | 150 | 85  | 42  | 9.3  | 9.3 | 9.3  | 136 | 12 | 0.82 | 124 | 102 | 45  | 64  | 6.8 | 1 |
| 1 | 75 | 25.1 | 91.5 | 1 | 2 | 2 | 1 | 0 | 0 | 131 | 81  | 64  | 9.4  | 9.3 | 9.35 | 107 | 21 | 1.06 | 211 | 73  | 69  | 137 | 5.4 | 0 |
| 1 | 62 | 24.2 | 86   | 2 | 2 | 2 | 1 | 0 | 1 | 132 | 84  | 73  | 9.2  | 9.2 | 9.2  | 105 | 16 | 0.86 | 175 | 79  | 110 | 65  | 5.6 | 1 |
| 2 | 59 | 20.8 | 78   | 1 | 1 | 1 | 0 | 0 | 1 | 124 | 79  | 55  | 8.2  | 8.3 | 8.25 | 99  | 24 | 0.67 | 240 | 55  | 60  | 164 | 5.5 | 0 |
| 1 | 58 | 27.2 | 96   | 2 | 1 | 1 | 1 | 1 | 0 | 142 | 99  | 61  | 8.3  | 8.1 | 8.2  | 128 | 13 | 1.08 | 187 | 115 | 67  | 104 | 6.5 | 1 |
| 1 | 51 | 21.5 | 80.6 | 2 | 1 | 2 | 0 | 0 | 0 | 99  | 64  | 49  | 8.1  | 8   | 8.05 | 77  | 19 | 1.07 | 183 | 137 | 44  | 119 | 5.5 | 1 |
| 1 | 45 | 22.8 | 85   | 1 | 1 | 1 | 1 | 0 | 1 | 139 | 91  | 81  | 7.3  | 7.5 | 7.4  | 108 | 14 | 0.91 | 223 | 116 | 48  | 159 | 5.4 | 1 |
| 1 | 66 | 21.8 | 86   | 1 | 1 | 2 | 1 | 0 | 0 | 130 | 93  | 73  | 8.7  | 8.9 | 8.8  | 99  | 15 | 0.89 | 190 | 102 | 45  | 132 | 5.5 | 0 |
| 1 | 52 | 22.7 | 82   | 2 | 2 | 2 | 0 | 1 | 0 | 113 | 68  | 54  | 8.2  | 8.1 | 8.15 | 141 | 15 | 0.84 | 172 | 56  | 76  | 88  | 6.7 | 0 |
| 1 | 63 | 24.6 | 89   | 2 | 1 | 2 | 1 | 1 | 0 | 115 | 71  | 53  | 8.7  | 8.9 | 8.8  | 115 | 14 | 0.82 | 196 | 147 | 45  | 130 | 6.8 | 0 |
| 1 | 57 | 26.1 | 92   | 2 | 2 | 2 | 1 | 0 | 1 | 142 | 90  | 56  | 8.3  | 8.1 | 8.2  | 109 | 14 | 1    | 166 | 81  | 64  | 86  | 5.5 | 1 |
| 2 | 51 | 21.6 | 77   | 1 | 1 | 1 | 1 | 0 | 1 | 139 | 102 | 80  | 7.6  | 7.9 | 7.75 | 95  | 14 | 0.68 | 218 | 85  | 62  | 143 | 5.6 | 1 |
| 1 | 63 | 24.9 | 80.5 | 1 | 1 | 2 | 1 | 0 | 0 | 146 | 99  | 69  | 8.4  | 8.1 | 8.25 | 97  | 15 | 0.9  | 179 | 82  | 49  | 115 | 5.4 | 1 |

|   |    |      |       |   |   |   |   |   |   |     |     |    |      |      |      |     |    |      |     |     |    |     |     |   |
|---|----|------|-------|---|---|---|---|---|---|-----|-----|----|------|------|------|-----|----|------|-----|-----|----|-----|-----|---|
| 1 | 60 | 25.5 | 95    | 2 | 2 | 2 | 1 | 0 | 1 | 156 | 87  | 65 | 8.1  | 8.1  | 8.1  | 113 | 14 | 0.93 | 150 | 112 | 46 | 95  | 5.9 | 1 |
| 1 | 45 | 23.9 | 87    | 1 | 2 | 1 | 1 | 0 | 0 | 127 | 92  | 73 | 11.3 | 12.9 | 12.1 | 104 | 11 | 0.98 | 181 | 86  | 40 | 125 | 5.4 | 1 |
| 1 | 55 | 23.4 | 83.5  | 2 | 1 | 2 | 0 | 0 | 1 | 118 | 81  | 58 | 7.7  | 7.9  | 7.8  | 101 | 11 | 0.68 | 230 | 511 | 36 | 130 | 5.8 | 1 |
| 1 | 59 | 24.5 | 87    | 2 | 1 | 2 | 1 | 0 | 1 | 162 | 109 | 76 | 10.2 | 9.5  | 9.85 | 103 | 13 | 0.89 | 193 | 227 | 38 | 110 | 5.8 | 0 |
| 1 | 63 | 25.1 | 91    | 2 | 1 | 2 | 1 | 0 | 1 | 145 | 93  | 52 | 8.2  | 8.6  | 8.4  | 102 | 16 | 1.03 | 217 | 99  | 75 | 125 | 5.4 | 1 |
| 1 | 56 | 27.8 | 96    | 1 | 1 | 1 | 0 | 0 | 0 | 131 | 85  | 67 | 6.8  | 6.8  | 6.8  | 125 | 15 | 0.89 | 220 | 88  | 57 | 146 | 6.1 | 1 |
| 1 | 45 | 23.3 | 84    | 2 | 2 | 2 | 0 | 0 | 0 | 130 | 85  | 54 | 7.2  | 7.3  | 7.25 | 107 | 15 | 0.91 | 212 | 102 | 65 | 129 | 5.7 | 0 |
| 2 | 59 | 21.2 | 75    | 1 | 1 | 2 | 0 | 0 | 0 | 122 | 72  | 57 | 8.1  | 7.8  | 7.95 | 92  | 11 | 0.68 | 198 | 50  | 72 | 116 | 5.4 | 1 |
| 1 | 45 | 25.1 | 95    | 2 | 1 | 2 | 1 | 0 | 0 | 144 | 99  | 74 | 5.6  | 5.8  | 5.7  | 96  | 12 | 0.94 | 197 | 168 | 45 | 125 | 5.5 | 0 |
| 1 | 54 | 23.3 | 85    | 2 | 1 | 2 | 0 | 1 | 1 | 122 | 89  | 75 | 7.3  | 7.2  | 7.25 | 128 | 19 | 0.87 | 192 | 155 | 36 | 133 | 5.7 | 0 |
| 1 | 52 | 26.5 | 91    | 2 | 2 | 1 | 1 | 0 | 0 | 125 | 91  | 54 | 7.8  | 7.7  | 7.75 | 97  | 12 | 0.99 | 207 | 52  | 60 | 142 | 5.4 | 1 |
| 1 | 58 | 23.7 | 87.5  | 2 | 1 | 2 | 1 | 0 | 1 | 127 | 78  | 54 | 8.1  | 7.8  | 7.95 | 96  | 17 | 0.99 | 154 | 135 | 36 | 100 | 5.4 | 0 |
| 1 | 51 | 21.5 | 80    | 2 | 1 | 2 | 1 | 0 | 1 | 123 | 84  | 62 | 7.7  | 7.8  | 7.75 | 104 | 15 | 0.84 | 173 | 212 | 44 | 100 | 5.6 | 1 |
| 1 | 55 | 27.0 | 97    | 2 | 2 | 1 | 1 | 0 | 0 | 140 | 93  | 71 | 7.4  | 7.6  | 7.5  | 115 | 10 | 0.64 | 164 | 52  | 72 | 88  | 5.7 | 1 |
| 1 | 63 | 25.6 | 93.7  | 2 | 1 | 2 | 0 | 0 | 1 | 128 | 88  | 60 | 8.8  | 8.4  | 8.6  | 107 | 15 | 0.85 | 172 | 97  | 59 | 103 | 5.4 | 1 |
| 2 | 59 | 26.6 | 90.5  | 1 | 1 | 2 | 0 | 0 | 1 | 117 | 73  | 62 | 7.3  | 7.4  | 7.35 | 102 | 15 | 0.49 | 246 | 116 | 46 | 180 | 5.8 | 1 |
| 1 | 52 | 24.0 | 84    | 1 | 1 | 2 | 1 | 1 | 1 | 134 | 104 | 73 | 8.8  | 7.8  | 8.3  | 137 | 12 | 0.9  | 222 | 233 | 45 | 148 | 7.1 | 1 |
| 1 | 48 | 26.0 | 97    | 2 | 1 | 2 | 0 | 1 | 1 | 114 | 85  | 70 | 7.9  | 7.8  | 7.85 | 164 | 13 | 0.79 | 199 | 159 | 38 | 143 | 9.7 | 1 |
| 1 | 65 | 29.0 | 111   | 2 | 1 | 2 | 1 | 0 | 0 | 112 | 78  | 78 | 8.5  | 8.1  | 8.3  | 114 | 18 | 0.94 | 202 | 78  | 57 | 136 | 5.7 | 1 |
| 1 | 60 | 28.4 | 110.5 | 2 | 1 | 1 | 1 | 1 | 1 | 123 | 89  | 72 | 7.9  | 7.6  | 7.75 | 113 | 13 | 0.91 | 238 | 133 | 58 | 158 | 5.8 | 0 |
| 1 | 50 | 23.2 | 82.5  | 1 | 2 | 2 | 1 | 0 | 1 | 126 | 91  | 65 | 6.5  | 6.7  | 6.6  | 106 | 9  | 0.64 | 190 | 541 | 35 | 81  | 5.7 | 0 |
| 1 | 50 | 26.4 | 97    | 1 | 1 | 2 | 1 | 1 | 1 | 149 | 95  | 72 | 8.1  | 7.9  | 8    | 140 | 14 | 0.76 | 193 | 266 | 41 | 130 | 7.1 | 1 |
| 1 | 50 | 22.5 | 75.5  | 1 | 1 | 2 | 1 | 0 | 0 | 149 | 98  | 61 | 8.9  | 7.8  | 8.35 | 89  | 17 | 1.03 | 235 | 114 | 58 | 135 | 5.7 | 1 |
| 2 | 47 | 22.9 | 84.2  | 1 | 1 | 2 | 0 | 0 | 0 | 113 | 82  | 65 | 7.6  | 7.7  | 7.65 | 81  | 11 | 0.76 | 197 | 133 | 57 | 116 | 5.4 | 1 |
| 1 | 57 | 23.6 | 82.8  | 2 | 1 | 2 | 0 | 0 | 0 | 107 | 74  | 54 | 8.1  | 7.7  | 7.9  | 98  | 18 | 1.06 | 213 | 149 | 47 | 144 | 5.7 | 1 |
| 1 | 56 | 23.2 | 84.8  | 2 | 1 | 2 | 1 | 0 | 1 | 120 | 78  | 93 | 7.1  | 7.1  | 7.1  | 111 | 16 | 1.45 | 198 | 133 | 50 | 138 | 5.6 | 0 |
| 1 | 69 | 23.7 | 94.1  | 2 | 2 | 1 | 1 | 1 | 1 | 131 | 88  | 62 | 8    | 8    | 8    | 106 | 14 | 0.76 | 138 | 90  | 79 | 59  | 5.9 | 1 |
| 1 | 49 | 27.0 | 90.8  | 1 | 1 | 1 | 1 | 0 | 0 | 126 | 75  | 56 | 7.1  | 7.3  | 7.2  | 101 | 14 | 0.94 | 208 | 69  | 57 | 150 | 6.2 | 0 |
| 1 | 60 | 25.6 | 91    | 2 | 2 | 2 | 0 | 1 | 1 | 134 | 95  | 60 | 8.6  | 8.3  | 8.45 | 121 | 17 | 1.09 | 145 | 112 | 54 | 73  | 7.4 | 0 |

|   |    |      |      |   |   |   |   |   |   |     |     |    |      |      |      |     |    |      |     |     |    |     |     |   |
|---|----|------|------|---|---|---|---|---|---|-----|-----|----|------|------|------|-----|----|------|-----|-----|----|-----|-----|---|
| 2 | 51 | 23.1 | 81   | 1 | 1 | 2 | 0 | 0 | 0 | 123 | 70  | 53 | 7.1  | 7    | 7.05 | 94  | 12 | 0.88 | 223 | 62  | 64 | 148 | 5.4 | 0 |
| 1 | 74 | 23.2 | 88   | 2 | 1 | 2 | 1 | 0 | 0 | 169 | 100 | 77 | 9.2  | 9.3  | 9.25 | 95  | 17 | 0.97 | 182 | 90  | 40 | 114 | 5.6 | 1 |
| 1 | 59 | 24.7 | 87.5 | 2 | 1 | 1 | 1 | 0 | 0 | 127 | 79  | 52 | 7.6  | 7.4  | 7.5  | 100 | 20 | 1.02 | 188 | 47  | 71 | 119 | 5.6 | 1 |
| 2 | 52 | 26.5 | 93.5 | 1 | 1 | 2 | 1 | 0 | 1 | 144 | 79  | 71 | 6.2  | 6    | 6.1  | 87  | 13 | 0.65 | 260 | 123 | 71 | 159 | 5.4 | 0 |
| 1 | 58 | 24.7 | 89   | 2 | 1 | 2 | 0 | 1 | 1 | 126 | 87  | 77 | 9.9  | 9.6  | 9.75 | 141 | 19 | 1    | 163 | 107 | 53 | 106 | 6.5 | 0 |
| 1 | 50 | 25.4 | 92   | 2 | 1 | 1 | 0 | 0 | 0 | 107 | 64  | 63 | 6.7  | 6.4  | 6.55 | 91  | 15 | 0.7  | 114 | 47  | 47 | 66  | 5.1 | 1 |
| 1 | 62 | 26.3 | 95   | 2 | 1 | 2 | 1 | 1 | 1 | 140 | 95  | 61 | 9.9  | 10   | 9.95 | 118 | 11 | 0.6  | 235 | 126 | 44 | 171 | 6.5 | 1 |
| 1 | 61 | 27.1 | 95   | 2 | 1 | 2 | 1 | 0 | 1 | 125 | 84  | 64 | 9.8  | 9.8  | 9.8  | 104 | 19 | 1.02 | 188 | 109 | 34 | 135 | 5.9 | 1 |
| 1 | 50 | 23.7 | 86   | 1 | 2 | 2 | 1 | 0 | 0 | 119 | 75  | 62 | 6.5  | 6.9  | 6.7  | 96  | 10 | 0.9  | 161 | 106 | 87 | 70  | 5.3 | 0 |
| 1 | 46 | 27.2 | 96.5 | 2 | 2 | 2 | 1 | 0 | 0 | 150 | 84  | 46 | 8.6  | 8.5  | 8.55 | 105 | 14 | 1    | 183 | 117 | 49 | 125 | 5.6 | 1 |
| 1 | 58 | 25.7 | 89.5 | 2 | 1 | 2 | 0 | 0 | 0 | 115 | 75  | 75 | 7    | 6.9  | 6.95 | 89  | 14 | 1.01 | 217 | 92  | 62 | 140 | 5.3 | 1 |
| 1 | 56 | 22.7 | 83   | 1 | 1 | 2 | 0 | 0 | 1 | 123 | 81  | 52 | 8    | 7.9  | 7.95 | 95  | 15 | 0.85 | 183 | 66  | 80 | 106 | 5.5 | 0 |
| 2 | 64 | 21.2 | 78   | 1 | 1 | 1 | 0 | 0 | 1 | 134 | 81  | 63 | 6.9  | 6.8  | 6.85 | 103 | 16 | 0.66 | 196 | 45  | 62 | 135 | 5.5 | 1 |
| 1 | 53 | 24.4 | 87.5 | 2 | 2 | 2 | 1 | 0 | 0 | 128 | 90  | 64 | 7.3  | 7.2  | 7.25 | 85  | 12 | 0.79 | 183 | 145 | 71 | 86  | 5.8 | 0 |
| 1 | 60 | 25.3 | 90   | 2 | 1 | 2 | 1 | 0 | 1 | 146 | 93  | 66 | 8    | 7.8  | 7.9  | 105 | 19 | 0.73 | 225 | 122 | 54 | 163 | 5.4 | 1 |
| 1 | 49 | 22.5 | 87.5 | 2 | 2 | 1 | 1 | 1 | 1 | 133 | 98  | 70 | 7.7  | 7.9  | 7.8  | 133 | 15 | 0.93 | 193 | 211 | 56 | 110 | 5.5 | 0 |
| 1 | 51 | 24.3 | 87   | 1 | 1 | 1 | 1 | 0 | 1 | 140 | 98  | 66 | 7.7  | 8    | 7.85 | 103 | 15 | 1.01 | 181 | 134 | 76 | 100 | 5.8 | 0 |
| 1 | 56 | 28.4 | 96.7 | 2 | 1 | 2 | 0 | 0 | 1 | 121 | 84  | 55 | 6.6  | 6.6  | 6.6  | 100 | 20 | 0.98 | 241 | 106 | 47 | 171 | 6   | 0 |
| 1 | 68 | 25.2 | 93   | 1 | 1 | 2 | 1 | 0 | 0 | 132 | 88  | 62 | 9    | 9.1  | 9.05 | 114 | 17 | 0.87 | 180 | 122 | 41 | 114 | 5.9 | 0 |
| 1 | 53 | 24.7 | 83   | 2 | 1 | 2 | 1 | 0 | 0 | 139 | 97  | 50 | 6.3  | 6.1  | 6.2  | 111 | 10 | 0.97 | 211 | 182 | 41 | 138 | 5.6 | 0 |
| 1 | 77 | 22.0 | 82   | 2 | 1 | 1 | 1 | 1 | 1 | 147 | 95  | 76 | 11.3 | 10.1 | 10.7 | 137 | 19 | 1.05 | 159 | 140 | 35 | 96  | 7.4 | 0 |
| 1 | 73 | 23.4 | 88   | 2 | 1 | 2 | 1 | 0 | 1 | 134 | 79  | 77 | 10.8 | 10.2 | 10.5 | 113 | 21 | 1.33 | 180 | 220 | 38 | 112 | 5.7 | 0 |
| 1 | 51 | 23.3 | 86   | 2 | 2 | 1 | 0 | 0 | 0 | 117 | 87  | 58 | 8.1  | 7.7  | 7.9  | 92  | 18 | 0.97 | 179 | 127 | 62 | 96  | 5.3 | 0 |
| 2 | 60 | 27.6 | 93   | 1 | 1 | 1 | 0 | 0 | 0 | 133 | 87  | 58 | 7.3  | 7.2  | 7.25 | 97  | 20 | 0.97 | 208 | 181 | 44 | 136 | 5.7 | 1 |
| 2 | 51 | 21.7 | 73   | 1 | 1 | 2 | 0 | 0 | 0 | 107 | 67  | 53 | 7.5  | 7.6  | 7.55 | 92  | 13 | 0.64 | 172 | 73  | 60 | 105 | 5.5 | 1 |
| 1 | 52 | 27.1 | 92   | 2 | 2 | 2 | 0 | 1 | 0 | 115 | 77  | 59 | 7.7  | 7.5  | 7.6  | 120 | 14 | 0.76 | 189 | 68  | 44 | 141 | 6.4 | 1 |
| 1 | 72 | 25.3 | 92   | 2 | 1 | 2 | 1 | 1 | 1 | 139 | 78  | 56 | 9.8  | 9.5  | 9.65 | 147 | 23 | 1.29 | 130 | 81  | 60 | 64  | 8.1 | 1 |
| 1 | 55 | 26.4 | 98.5 | 1 | 1 | 1 | 1 | 0 | 1 | 144 | 92  | 76 | 7.7  | 7.2  | 7.45 | 108 | 15 | 1.11 | 195 | 176 | 39 | 132 | 5.7 | 1 |
| 1 | 49 | 24.7 | 88   | 2 | 2 | 1 | 0 | 0 | 0 | 137 | 88  | 66 | 7    | 7    | 7    | 94  | 21 | 0.98 | 219 | 128 | 55 | 151 | 5.4 | 1 |

|   |    |      |      |   |   |   |   |   |   |     |     |    |      |      |      |     |    |      |     |     |    |     |     |   |
|---|----|------|------|---|---|---|---|---|---|-----|-----|----|------|------|------|-----|----|------|-----|-----|----|-----|-----|---|
| 2 | 44 | 19.2 | 71   | 1 | 1 | 1 | 0 | 0 | 0 | 109 | 74  | 61 | 7.2  | 7.2  | 7.2  | 89  | 11 | 0.59 | 189 | 103 | 57 | 102 | 5.3 | 0 |
| 1 | 58 | 22.7 | 82   | 2 | 1 | 2 | 0 | 0 | 0 | 135 | 81  | 55 | 7.3  | 7    | 7.15 | 87  | 20 | 0.77 | 166 | 83  | 56 | 99  | 5.3 | 1 |
| 1 | 57 | 23.3 | 86.5 | 2 | 1 | 2 | 0 | 0 | 0 | 130 | 83  | 66 | 7.1  | 7.4  | 7.25 | 106 | 15 | 1.02 | 228 | 101 | 63 | 157 | 5.4 | 1 |
| 1 | 52 | 26.1 | 89   | 2 | 1 | 2 | 1 | 1 | 1 | 108 | 69  | 69 | 6.9  | 6.6  | 6.75 | 136 | 15 | 0.91 | 147 | 124 | 48 | 83  | 6.9 | 0 |
| 2 | 48 | 21.4 | 75   | 1 | 1 | 2 | 0 | 0 | 0 | 115 | 74  | 69 | 6.7  | 6.5  | 6.6  | 83  | 14 | 0.68 | 212 | 51  | 75 | 127 | 5.5 | 0 |
| 1 | 54 | 27.8 | 103  | 2 | 1 | 2 | 1 | 0 | 1 | 140 | 103 | 74 | 7.6  | 7.5  | 7.55 | 97  | 11 | 0.85 | 238 | 241 | 40 | 156 | 5.6 | 0 |
| 1 | 67 | 23.1 | 84   | 1 | 1 | 2 | 0 | 0 | 0 | 130 | 82  | 62 | 8.5  | 8.2  | 8.35 | 107 | 14 | 0.96 | 206 | 137 | 64 | 126 | 5.4 | 1 |
| 1 | 57 | 22.9 | 80   | 2 | 1 | 2 | 0 | 0 | 0 | 121 | 82  | 66 | 7.5  | 7.4  | 7.45 | 110 | 18 | 0.94 | 182 | 71  | 63 | 105 | 5.6 | 1 |
| 1 | 47 | 21.6 | 83   | 2 | 1 | 1 | 1 | 0 | 1 | 124 | 92  | 86 | 7.8  | 7.6  | 7.7  | 96  | 14 | 0.86 | 225 | 107 | 46 | 165 | 5.5 | 1 |
| 1 | 52 | 20.0 | 71   | 2 | 1 | 2 | 0 | 0 | 0 | 101 | 70  | 60 | 7.7  | 7.6  | 7.65 | 94  | 7  | 0.77 | 202 | 109 | 62 | 120 | 5.6 | 1 |
| 1 | 61 | 25.6 | 91   | 2 | 2 | 2 | 1 | 1 | 1 | 147 | 98  | 78 | 9.3  | 8.8  | 9.05 | 128 | 14 | 0.98 | 186 | 95  | 47 | 127 | 7   | 1 |
| 1 | 49 | 19.0 | 78   | 1 | 1 | 2 | 0 | 0 | 1 | 124 | 79  | 61 | 7    | 7.1  | 7.05 | 92  | 12 | 0.8  | 151 | 146 | 29 | 100 | 5.3 | 1 |
| 2 | 52 | 18.4 | 68   | 1 | 1 | 2 | 0 | 0 | 0 | 114 | 72  | 58 | 8.8  | 8.7  | 8.75 | 86  | 12 | 0.58 | 163 | 54  | 73 | 81  | 5.7 | 0 |
| 1 | 56 | 25.8 | 87.5 | 2 | 1 | 2 | 0 | 0 | 1 | 112 | 75  | 59 | 6.8  | 6.8  | 6.8  | 102 | 15 | 0.85 | 188 | 210 | 49 | 115 | 5.3 | 0 |
| 1 | 45 | 26.4 | 89   | 2 | 2 | 2 | 1 | 0 | 1 | 102 | 75  | 64 | 7.4  | 7.6  | 7.5  | 109 | 19 | 1.02 | 279 | 146 | 61 | 208 | 5.5 | 0 |
| 2 | 56 | 22.3 | 81.5 | 1 | 1 | 1 | 0 | 0 | 1 | 118 | 87  | 63 | 8    | 7.6  | 7.8  | 97  | 10 | 0.61 | 173 | 113 | 50 | 106 | 5.8 | 0 |
| 2 | 49 | 20.3 | 77   | 1 | 1 | 2 | 1 | 0 | 0 | 124 | 71  | 69 | 7.5  | 7.6  | 7.55 | 96  | 13 | 0.6  | 169 | 80  | 55 | 105 | 5.8 | 1 |
| 1 | 64 | 23.5 | 87   | 2 | 1 | 2 | 0 | 1 | 1 | 136 | 85  | 55 | 9.2  | 9    | 9.1  | 123 | 11 | 0.92 | 207 | 106 | 52 | 139 | 6.4 | 0 |
| 1 | 53 | 26.0 | 91   | 1 | 1 | 1 | 1 | 0 | 0 | 139 | 101 | 72 | 8.4  | 8.3  | 8.35 | 85  | 11 | 0.74 | 214 | 99  | 49 | 151 | 5.3 | 1 |
| 1 | 49 | 28.0 | 95.6 | 2 | 2 | 2 | 1 | 0 | 1 | 130 | 90  | 66 | 7.5  | 7.2  | 7.35 | 103 | 17 | 1.15 | 143 | 102 | 72 | 65  | 5.4 | 0 |
| 1 | 51 | 22.4 | 81.5 | 1 | 1 | 2 | 0 | 0 | 0 | 137 | 82  | 55 | 7.6  | 7.7  | 7.65 | 96  | 18 | 1    | 177 | 140 | 55 | 105 | 5.4 | 0 |
| 2 | 66 | 21.2 | 79.8 | 1 | 1 | 2 | 0 | 0 | 1 | 124 | 81  | 63 | 8.6  | 8.2  | 8.4  | 99  | 17 | 0.6  | 176 | 179 | 50 | 94  | 5.5 | 0 |
| 1 | 57 | 26.5 | 94   | 2 | 1 | 2 | 1 | 0 | 1 | 129 | 89  | 91 | 10.3 | 11.1 | 10.7 | 105 | 13 | 1.08 | 202 | 66  | 51 | 143 | 5.9 | 1 |
| 1 | 61 | 26.7 | 94   | 2 | 2 | 1 | 1 | 0 | 0 | 129 | 90  | 54 | 9.3  | 9.2  | 9.25 | 101 | 12 | 1.01 | 168 | 106 | 54 | 102 | 5.7 | 1 |
| 1 | 58 | 25.2 | 95   | 2 | 2 | 1 | 0 | 0 | 1 | 128 | 88  | 55 | 8.7  | 8.5  | 8.6  | 115 | 19 | 0.84 | 241 | 133 | 61 | 155 | 6   | 1 |
| 1 | 58 | 22.1 | 84   | 2 | 1 | 2 | 0 | 0 | 1 | 126 | 83  | 60 | 7.8  | 7.8  | 7.8  | 94  | 15 | 0.98 | 278 | 137 | 55 | 185 | 6.1 | 0 |
| 1 | 63 | 24.6 | 88.8 | 2 | 2 | 2 | 1 | 1 | 1 | 165 | 100 | 78 | 8.8  | 9    | 8.9  | 101 | 14 | 1.11 | 156 | 192 | 31 | 89  | 4.7 | 1 |
| 2 | 56 | 25.2 | 90   | 1 | 1 | 2 | 0 | 0 | 1 | 110 | 78  | 73 | 8.5  | 8.1  | 8.3  | 96  | 15 | 0.75 | 254 | 126 | 48 | 180 | 5.9 | 0 |
| 1 | 54 | 25.4 | 91.5 | 1 | 1 | 2 | 0 | 0 | 1 | 123 | 80  | 69 | 7.1  | 6.7  | 6.9  | 107 | 10 | 0.9  | 163 | 111 | 39 | 105 | 6.2 | 1 |

|   |    |      |      |   |   |   |   |   |   |     |     |    |     |     |      |     |    |      |     |     |    |     |     |   |
|---|----|------|------|---|---|---|---|---|---|-----|-----|----|-----|-----|------|-----|----|------|-----|-----|----|-----|-----|---|
| 1 | 47 | 22.2 | 82.6 | 2 | 1 | 2 | 0 | 0 | 1 | 118 | 83  | 48 | 7.2 | 7.2 | 7.2  | 92  | 17 | 1.04 | 243 | 92  | 47 | 181 | 5.4 | 1 |
| 1 | 52 | 20.4 | 76   | 2 | 1 | 2 | 0 | 0 | 0 | 122 | 71  | 63 | 7.5 | 7.4 | 7.45 | 94  | 13 | 0.84 | 135 | 53  | 46 | 82  | 5.4 | 1 |
| 1 | 41 | 24.1 | 87.5 | 2 | 2 | 2 | 0 | 0 | 1 | 124 | 88  | 68 | 6.4 | 6.2 | 6.3  | 93  | 10 | 0.87 | 278 | 352 | 51 | 178 | 5.4 | 1 |
| 1 | 49 | 28.4 | 98   | 1 | 1 | 2 | 0 | 0 | 0 | 124 | 79  | 59 | 6.7 | 6.9 | 6.8  | 99  | 19 | 1.04 | 185 | 100 | 58 | 100 | 5.4 | 0 |
| 1 | 43 | 25.3 | 92   | 2 | 2 | 2 | 1 | 0 | 1 | 138 | 105 | 75 | 8.3 | 8.2 | 8.25 | 119 | 13 | 0.87 | 179 | 241 | 49 | 102 | 5.7 | 0 |
| 1 | 71 | 19.5 | 78   | 1 | 1 | 2 | 0 | 1 | 1 | 128 | 81  | 67 | 9.7 | 9.3 | 9.5  | 120 | 17 | 0.88 | 121 | 76  | 62 | 60  | 6.1 | 1 |
| 1 | 58 | 23.9 | 85   | 1 | 1 | 1 | 1 | 0 | 1 | 128 | 92  | 60 | 7.6 | 7.4 | 7.5  | 108 | 18 | 1.25 | 174 | 173 | 59 | 105 | 5.8 | 1 |
| 1 | 50 | 22.5 | 80   | 2 | 1 | 2 | 0 | 0 | 1 | 109 | 78  | 68 | 8.2 | 8.3 | 8.25 | 118 | 8  | 0.92 | 238 | 119 | 54 | 164 | 6   | 0 |
| 1 | 56 | 24.6 | 85   | 2 | 2 | 1 | 0 | 0 | 1 | 103 | 70  | 49 | 6.7 | 7   | 6.85 | 94  | 14 | 0.99 | 256 | 99  | 45 | 191 | 5.4 | 1 |
| 1 | 68 | 25.0 | 94.5 | 2 | 2 | 2 | 1 | 1 | 1 | 169 | 92  | 55 | 8.9 | 8.9 | 8.9  | 124 | 13 | 0.79 | 190 | 203 | 58 | 99  | 6.6 | 0 |
| 1 | 49 | 25.0 | 89   | 2 | 2 | 2 | 0 | 0 | 0 | 115 | 74  | 71 | 6.5 | 6.4 | 6.45 | 96  | 11 | 0.99 | 182 | 56  | 48 | 133 | 5.6 | 0 |
| 1 | 43 | 27.2 | 98.5 | 1 | 1 | 2 | 1 | 0 | 0 | 139 | 91  | 71 | 7.2 | 7   | 7.1  | 96  | 14 | 1.12 | 172 | 120 | 49 | 111 | 5.4 | 0 |
| 1 | 53 | 18.6 | 83.5 | 2 | 1 | 2 | 0 | 0 | 1 | 119 | 80  | 61 | 8   | 7.8 | 7.9  | 93  | 13 | 1    | 253 | 173 | 58 | 177 | 5.7 | 0 |
| 1 | 49 | 25.7 | 90   | 2 | 2 | 1 | 1 | 0 | 0 | 155 | 101 | 72 | 8.8 | 9   | 8.9  | 86  | 8  | 0.69 | 234 | 105 | 71 | 142 | 5.4 | 1 |
| 1 | 50 | 23.8 | 82.5 | 2 | 2 | 2 | 1 | 0 | 0 | 121 | 85  | 64 | 7.9 | 8   | 7.95 | 107 | 13 | 1.01 | 195 | 82  | 70 | 115 | 5.3 | 1 |
| 1 | 69 | 24.3 | 87   | 1 | 1 | 1 | 1 | 1 | 1 | 134 | 91  | 57 | 8.4 | 8.3 | 8.35 | 123 | 11 | 0.83 | 174 | 137 | 47 | 89  | 6.4 | 1 |
| 1 | 51 | 24.6 | 86.4 | 1 | 1 | 2 | 0 | 0 | 1 | 120 | 81  | 64 | 6.5 | 6.6 | 6.55 | 88  | 12 | 0.82 | 182 | 225 | 49 | 114 | 5.3 | 1 |
| 1 | 58 | 19.9 | 78.5 | 1 | 1 | 2 | 0 | 0 | 1 | 111 | 73  | 86 | 8.1 | 8   | 8.05 | 108 | 12 | 0.75 | 222 | 79  | 54 | 145 | 5.6 | 1 |
| 1 | 60 | 23.5 | 88   | 2 | 1 | 2 | 0 | 0 | 1 | 123 | 95  | 67 | 9.1 | 8.8 | 8.95 | 103 | 12 | 0.92 | 206 | 228 | 41 | 134 | 5.6 | 0 |
| 1 | 54 | 25.0 | 92   | 2 | 2 | 1 | 1 | 1 | 1 | 132 | 86  | 72 | 7.8 | 7.7 | 7.75 | 153 | 14 | 1.01 | 160 | 93  | 67 | 86  | 6.2 | 0 |
| 1 | 51 | 23.1 | 83   | 2 | 1 | 2 | 0 | 0 | 0 | 122 | 86  | 66 | 9   | 8.8 | 8.9  | 88  | 17 | 1.05 | 193 | 85  | 63 | 121 | 5.4 | 1 |
| 2 | 64 | 25.6 | 85   | 1 | 1 | 1 | 0 | 0 | 1 | 132 | 86  | 86 | 8   | 7.8 | 7.9  | 112 | 20 | 0.74 | 258 | 205 | 51 | 165 | 5.8 | 0 |
| 1 | 53 | 24.1 | 90   | 1 | 1 | 2 | 1 | 0 | 1 | 125 | 96  | 62 | 7.2 | 7.1 | 7.15 | 107 | 17 | 0.98 | 143 | 81  | 44 | 86  | 5.5 | 1 |
| 2 | 62 | 24.5 | 85   | 1 | 1 | 2 | 0 | 0 | 0 | 134 | 84  | 55 | 6.9 | 6.9 | 6.9  | 95  | 17 | 0.82 | 202 | 129 | 49 | 124 | 5.1 | 0 |
| 1 | 58 | 26.5 | 98   | 2 | 1 | 2 | 0 | 0 | 0 | 130 | 81  | 51 | 8   | 7.6 | 7.8  | 102 | 16 | 1.08 | 209 | 91  | 66 | 137 | 5.5 | 0 |
| 2 | 55 | 25.5 | 84.8 | 1 | 1 | 2 | 0 | 0 | 1 | 122 | 82  | 52 | 7   | 7.1 | 7.05 | 93  | 12 | 0.68 | 240 | 111 | 50 | 177 | 5.7 | 0 |
| 1 | 54 | 23.8 | 86   | 2 | 2 | 2 | 1 | 1 | 1 | 126 | 90  | 68 | 8.4 | 8   | 8.2  | 132 | 12 | 0.7  | 156 | 69  | 54 | 96  | 5.9 | 1 |
| 1 | 57 | 23.4 | 81   | 2 | 1 | 2 | 0 | 0 | 0 | 119 | 71  | 44 | 7   | 7.4 | 7.2  | 104 | 16 | 1.07 | 208 | 81  | 53 | 139 | 6   | 1 |
| 1 | 50 | 27.6 | 92   | 1 | 1 | 2 | 0 | 0 | 0 | 129 | 84  | 53 | 7.5 | 7.8 | 7.65 | 115 | 13 | 1.03 | 199 | 157 | 47 | 132 | 6   | 1 |

|   |    |      |      |   |   |   |   |   |   |     |     |    |     |     |      |     |    |      |     |     |     |     |     |   |
|---|----|------|------|---|---|---|---|---|---|-----|-----|----|-----|-----|------|-----|----|------|-----|-----|-----|-----|-----|---|
| 1 | 50 | 23.2 | 90.5 | 2 | 1 | 2 | 0 | 0 | 1 | 114 | 88  | 50 | 9.3 | 9.3 | 9.3  | 103 | 14 | 0.82 | 184 | 223 | 42  | 114 | 5.4 | 0 |
| 1 | 50 | 20.0 | 83   | 2 | 1 | 1 | 0 | 0 | 0 | 118 | 81  | 58 | 8   | 7.5 | 7.75 | 90  | 10 | 0.79 | 180 | 163 | 47  | 111 | 5.2 | 0 |
| 1 | 54 | 31.4 | 108  | 2 | 2 | 2 | 1 | 0 | 1 | 140 | 93  | 63 | 6.4 | 6.8 | 6.6  | 97  | 11 | 1    | 147 | 213 | 36  | 86  | 5.9 | 1 |
| 1 | 64 | 23.1 | 84   | 2 | 1 | 2 | 1 | 0 | 0 | 120 | 84  | 57 | 8.5 | 8.7 | 8.6  | 88  | 15 | 0.86 | 205 | 93  | 48  | 148 | 5.3 | 1 |
| 1 | 54 | 23.8 | 85   | 1 | 1 | 2 | 0 | 0 | 1 | 136 | 96  | 61 | 6.5 | 6.7 | 6.6  | 95  | 11 | 1.15 | 168 | 427 | 37  | 72  | 5.3 | 0 |
| 2 | 56 | 20.1 | 75.5 | 1 | 1 | 2 | 0 | 0 | 1 | 105 | 66  | 58 | 7.3 | 7.5 | 7.4  | 93  | 12 | 0.62 | 194 | 209 | 55  | 110 | 5.1 | 1 |
| 1 | 52 | 23.4 | 81.5 | 2 | 2 | 2 | 0 | 1 | 1 | 110 | 73  | 61 | 7.1 | 7.2 | 7.15 | 106 | 26 | 0.82 | 149 | 110 | 41  | 96  | 6   | 1 |
| 1 | 35 | 22.9 | 82.5 | 2 | 2 | 2 | 0 | 0 | 1 | 121 | 72  | 56 | 6.8 | 6.6 | 6.7  | 90  | 10 | 0.79 | 241 | 147 | 68  | 156 | 5.4 | 0 |
| 2 | 56 | 19.8 | 72   | 1 | 1 | 2 | 1 | 0 | 0 | 133 | 91  | 72 | 7.6 | 7.5 | 7.55 | 92  | 18 | 0.9  | 204 | 35  | 88  | 117 | 5.9 | 0 |
| 1 | 72 | 22.6 | 87   | 2 | 1 | 2 | 1 | 0 | 1 | 119 | 87  | 62 | 8.5 | 8.6 | 8.55 | 114 | 17 | 0.86 | 166 | 95  | 64  | 96  | 5.8 | 1 |
| 2 | 63 | 22.1 | 79   | 1 | 2 | 2 | 1 | 0 | 1 | 112 | 81  | 73 | 8.8 | 8.9 | 8.85 | 106 | 17 | 0.66 | 199 | 49  | 117 | 76  | 6.3 | 0 |
| 2 | 49 | 25.4 | 92   | 1 | 1 | 2 | 1 | 0 | 0 | 146 | 93  | 88 | 7.4 | 7.3 | 7.35 | 94  | 13 | 0.69 | 194 | 102 | 72  | 109 | 5.3 | 0 |
| 1 | 51 | 21.2 | 79.2 | 2 | 1 | 2 | 0 | 1 | 1 | 129 | 86  | 63 | 7.5 | 7.3 | 7.4  | 112 | 11 | 0.9  | 123 | 161 | 34  | 71  | 5.8 | 0 |
| 1 | 53 | 25.7 | 89   | 2 | 1 | 1 | 0 | 0 | 1 | 126 | 86  | 60 | 6.7 | 6.5 | 6.6  | 99  | 15 | 0.87 | 124 | 232 | 54  | 158 | 5.3 | 1 |
| 2 | 49 | 19.9 | 75   | 1 | 1 | 2 | 0 | 0 | 1 | 117 | 81  | 84 | 6.9 | 6.9 | 6.9  | 95  | 11 | 0.57 | 246 | 142 | 67  | 150 | 5.5 | 0 |
| 1 | 65 | 25.5 | 84   | 2 | 2 | 2 | 0 | 0 | 1 | 104 | 63  | 44 | 7.9 | 8.2 | 8.05 | 116 | 12 | 0.85 | 196 | 87  | 55  | 138 | 6.3 | 1 |
| 2 | 51 | 31.6 | 96   | 1 | 1 | 2 | 0 | 0 | 0 | 128 | 78  | 60 | 5.6 | 5.8 | 5.7  | 101 | 10 | 0.63 | 218 | 77  | 55  | 148 | 5.9 | 1 |
| 1 | 60 | 23.6 | 92   | 1 | 1 | 1 | 0 | 0 | 1 | 122 | 80  | 74 | 7.1 | 7.3 | 7.2  | 108 | 10 | 0.78 | 231 | 110 | 42  | 173 | 5.4 | 1 |
| 1 | 54 | 24.4 | 90   | 2 | 1 | 1 | 1 | 0 | 1 | 155 | 100 | 58 | 9   | 8.1 | 8.55 | 108 | 13 | 0.95 | 154 | 178 | 47  | 88  | 5.6 | 1 |
| 1 | 54 | 27.6 | 93.5 | 2 | 2 | 2 | 1 | 0 | 0 | 154 | 88  | 63 | 7.4 | 7.2 | 7.3  | 104 | 21 | 1.11 | 191 | 182 | 59  | 116 | 5.5 | 0 |
| 1 | 54 | 23.4 | 85   | 1 | 2 | 2 | 1 | 0 | 1 | 120 | 86  | 68 | 6   | 6   | 6    | 94  | 11 | 0.76 | 254 | 120 | 66  | 160 | 5.6 | 1 |
| 2 | 53 | 21.6 | 75   | 1 | 1 | 2 | 0 | 1 | 1 | 113 | 78  | 62 | 8.7 | 8.6 | 8.65 | 137 | 15 | 0.77 | 217 | 236 | 43  | 138 | 6.9 | 1 |
| 2 | 54 | 22.9 | 81   | 1 | 1 | 1 | 0 | 0 | 0 | 131 | 73  | 63 | 7.6 | 7.8 | 7.7  | 88  | 11 | 0.57 | 210 | 102 | 59  | 140 | 5.6 | 0 |
| 1 | 50 | 24.6 | 86   | 2 | 2 | 2 | 0 | 0 | 1 | 121 | 79  | 56 | 6.6 | 6.6 | 6.6  | 107 | 24 | 0.84 | 195 | 300 | 43  | 98  | 5.7 | 1 |
| 1 | 54 | 24.5 | 89.6 | 2 | 2 | 2 | 1 | 0 | 1 | 140 | 92  | 72 | 7.6 | 7.5 | 7.55 | 93  | 17 | 0.93 | 269 | 160 | 66  | 181 | 5.5 | 0 |
| 1 | 45 | 28.7 | 93.5 | 2 | 2 | 2 | 1 | 0 | 1 | 134 | 96  | 77 | 9.9 | 6.7 | 8.3  | 97  | 9  | 0.9  | 202 | 209 | 51  | 129 | 5.1 | 0 |
| 1 | 50 | 21.5 | 81.3 | 2 | 2 | 1 | 1 | 0 | 1 | 129 | 93  | 84 | 9   | 8.2 | 8.6  | 115 | 13 | 0.73 | 202 | 256 | 59  | 114 | 5.4 | 1 |
| 1 | 55 | 22.2 | 89   | 2 | 2 | 2 | 1 | 1 | 0 | 157 | 111 | 78 | 9.9 | 8.9 | 9.4  | 146 | 11 | 0.76 | 173 | 139 | 42  | 115 | 6.7 | 1 |
| 1 | 65 | 22.5 | 84   | 2 | 1 | 2 | 1 | 1 | 1 | 126 | 77  | 56 | 8.1 | 8.4 | 8.25 | 129 | 20 | 1.33 | 156 | 52  | 53  | 100 | 6.8 | 0 |



|   |    |      |      |   |   |   |   |   |   |     |     |    |      |      |      |     |    |      |     |     |    |     |      |   |
|---|----|------|------|---|---|---|---|---|---|-----|-----|----|------|------|------|-----|----|------|-----|-----|----|-----|------|---|
| 1 | 56 | 22.7 | 79   | 2 | 1 | 1 | 0 | 1 | 1 | 122 | 84  | 78 | 8.1  | 8    | 8.05 | 165 | 10 | 0.86 | 192 | 100 | 43 | 99  | 7.5  | 0 |
| 1 | 49 | 29.8 | 94   | 2 | 2 | 2 | 0 | 0 | 0 | 127 | 77  | 61 | 6.6  | 6.5  | 6.55 | 106 | 15 | 0.76 | 167 | 139 | 50 | 105 | 5.7  | 1 |
| 2 | 53 | 21.4 | 78   | 1 | 1 | 2 | 0 | 0 | 0 | 115 | 74  | 56 | 6.8  | 7    | 6.9  | 84  | 22 | 0.75 | 186 | 46  | 75 | 94  | 5.4  | 1 |
| 1 | 52 | 23.7 | 81   | 1 | 1 | 1 | 0 | 0 | 0 | 115 | 78  | 56 | 7.9  | 8.1  | 8    | 85  | 12 | 0.94 | 149 | 120 | 48 | 81  | 5.5  | 0 |
| 1 | 59 | 25.0 | 85   | 2 | 2 | 2 | 0 | 0 | 0 | 124 | 82  | 61 | 7.1  | 7.2  | 7.15 | 94  | 14 | 0.68 | 195 | 90  | 65 | 123 | 5.4  | 0 |
| 1 | 50 | 22.3 | 82   | 2 | 2 | 1 | 1 | 0 | 0 | 121 | 89  | 68 | 7.6  | 7.6  | 7.6  | 96  | 14 | 0.77 | 210 | 109 | 80 | 111 | 5.4  | 0 |
| 1 | 44 | 24.9 | 93   | 2 | 2 | 2 | 0 | 0 | 0 | 121 | 80  | 73 | 7.3  | 7.2  | 7.25 | 110 | 17 | 0.83 | 164 | 126 | 54 | 99  | 6.1  | 0 |
| 1 | 57 | 28.4 | 94.5 | 2 | 2 | 2 | 1 | 0 | 0 | 156 | 100 | 67 | 6.2  | 6.2  | 6.2  | 112 | 9  | 0.79 | 170 | 168 | 51 | 95  | 5.7  | 1 |
| 1 | 65 | 32.0 | 104  | 2 | 1 | 1 | 0 | 0 | 1 | 132 | 79  | 58 | 6.2  | 6.2  | 6.2  | 115 | 23 | 1.18 | 189 | 251 | 30 | 112 | 6.3  | 1 |
| 1 | 62 | 25.3 | 91   | 1 | 1 | 2 | 0 | 0 | 1 | 129 | 82  | 61 | 8    | 7.9  | 7.95 | 85  | 16 | 1.11 | 151 | 87  | 48 | 92  | 5.6  | 1 |
| 2 | 61 | 27.8 | 87   | 1 | 1 | 1 | 1 | 0 | 1 | 127 | 85  | 62 | 7.7  | 8.2  | 7.95 | 77  | 20 | 0.7  | 178 | 75  | 55 | 115 | 5.6  | 1 |
| 1 | 55 | 28.4 | 101  | 2 | 1 | 2 | 1 | 0 | 1 | 124 | 84  | 58 | 7.8  | 7.4  | 7.6  | 97  | 21 | 1.19 | 217 | 300 | 41 | 129 | 5.5  | 1 |
| 2 | 42 | 19.8 | 72   | 1 | 1 | 2 | 1 | 0 | 0 | 137 | 97  | 73 | 7.6  | 7.3  | 7.45 | 97  | 8  | 0.79 | 213 | 52  | 58 | 134 | 5.5  | 0 |
| 1 | 52 | 25.9 | 87   | 2 | 1 | 2 | 1 | 0 | 1 | 140 | 86  | 79 | 6.6  | 6.5  | 6.55 | 119 | 12 | 1.01 | 218 | 237 | 40 | 142 | 5.6  | 0 |
| 1 | 58 | 25.9 | 89   | 2 | 1 | 2 | 1 | 1 | 1 | 128 | 91  | 86 | 8.2  | 7.7  | 7.95 | 165 | 11 | 1.07 | 150 | 87  | 49 | 92  | 7.4  | 0 |
| 2 | 52 | 20.7 | 72.2 | 1 | 1 | 2 | 0 | 0 | 0 | 120 | 84  | 61 | 6.5  | 6.6  | 6.55 | 94  | 13 | 0.67 | 209 | 132 | 56 | 131 | 5.4  | 1 |
| 1 | 55 | 21.4 | 82   | 2 | 1 | 1 | 1 | 0 | 0 | 126 | 90  | 58 | 8.9  | 8.9  | 8.9  | 92  | 14 | 0.88 | 216 | 103 | 58 | 145 | 5.4  | 1 |
| 1 | 72 | 26.8 | 93   | 1 | 1 | 1 | 1 | 1 | 1 | 159 | 97  | 68 | 9.8  | 9.2  | 9.5  | 265 | 37 | 1.58 | 182 | 336 | 30 | 95  | 11.8 | 1 |
| 2 | 58 | 21.2 | 75.8 | 1 | 1 | 2 | 0 | 0 | 1 | 118 | 69  | 61 | 7.7  | 7.6  | 7.65 | 96  | 18 | 0.53 | 204 | 50  | 77 | 104 | 5.4  | 1 |
| 1 | 59 | 28.5 | 93   | 1 | 2 | 2 | 1 | 0 | 1 | 174 | 105 | 68 | 10.5 | 11.9 | 11.2 | 93  | 19 | 0.83 | 201 | 107 | 50 | 137 | 5.7  | 1 |
| 1 | 60 | 23.2 | 84   | 2 | 2 | 2 | 1 | 1 | 1 | 135 | 89  | 68 | 9.5  | 9.2  | 9.35 | 150 | 8  | 0.8  | 189 | 56  | 42 | 126 | 8.5  | 1 |
| 1 | 58 | 23.7 | 82   | 2 | 1 | 2 | 0 | 0 | 1 | 120 | 81  | 55 | 7.8  | 7.8  | 7.8  | 114 | 16 | 0.94 | 239 | 62  | 60 | 162 | 6.1  | 1 |
| 1 | 59 | 25.7 | 88   | 2 | 1 | 2 | 0 | 0 | 0 | 122 | 72  | 56 | 7.9  | 8.5  | 8.2  | 95  | 12 | 0.93 | 217 | 159 | 40 | 138 | 5.8  | 1 |
| 1 | 52 | 28.3 | 96   | 1 | 1 | 1 | 0 | 0 | 1 | 118 | 76  | 55 | 8    | 7.8  | 7.9  | 108 | 11 | 0.86 | 147 | 111 | 52 | 84  | 5.8  | 0 |
| 1 | 57 | 27.1 | 94   | 1 | 1 | 2 | 1 | 0 | 0 | 144 | 103 | 54 | 7.8  | 7.6  | 7.7  | 94  | 14 | 0.99 | 151 | 121 | 40 | 70  | 5.4  | 0 |
| 1 | 59 | 28.3 | 93   | 2 | 2 | 2 | 1 | 0 | 0 | 140 | 93  | 65 | 7.6  | 8.1  | 7.85 | 108 | 13 | 0.88 | 177 | 109 | 51 | 119 | 5.6  | 1 |
| 1 | 60 | 21.4 | 75   | 1 | 1 | 1 | 0 | 0 | 0 | 106 | 69  | 51 | 7.9  | 8.3  | 8.1  | 80  | 19 | 1.02 | 180 | 64  | 48 | 113 | 5.9  | 1 |
| 2 | 53 | 21.7 | 80   | 1 | 2 | 2 | 0 | 0 | 1 | 98  | 62  | 50 | 7.8  | 8    | 7.9  | 93  | 21 | 0.77 | 229 | 70  | 71 | 135 | 5.7  | 1 |
| 2 | 55 | 19.9 | 76.8 | 1 | 1 | 2 | 0 | 0 | 1 | 131 | 77  | 60 | 9.4  | 8.5  | 8.95 | 94  | 10 | 0.7  | 244 | 153 | 55 | 165 | 5.4  | 0 |

|   |    |      |      |   |   |   |   |   |   |     |     |    |      |      |      |     |    |      |     |     |    |     |     |   |
|---|----|------|------|---|---|---|---|---|---|-----|-----|----|------|------|------|-----|----|------|-----|-----|----|-----|-----|---|
| 2 | 51 | 21.6 | 81   | 1 | 1 | 1 | 0 | 0 | 1 | 123 | 71  | 58 | 6.9  | 7.1  | 7    | 86  | 14 | 0.74 | 219 | 139 | 43 | 147 | 5.8 | 0 |
| 1 | 44 | 23.0 | 80   | 1 | 2 | 1 | 0 | 0 | 1 | 130 | 81  | 58 | 8.2  | 7.9  | 8.05 | 106 | 11 | 0.83 | 127 | 38  | 39 | 79  | 5.7 | 0 |
| 1 | 53 | 23.4 | 85.5 | 2 | 2 | 2 | 1 | 0 | 1 | 127 | 87  | 63 | 8.2  | 8.5  | 8.35 | 119 | 17 | 0.97 | 190 | 172 | 59 | 110 | 6.2 | 0 |
| 1 | 51 | 24.3 | 90   | 2 | 2 | 1 | 0 | 0 | 0 | 115 | 82  | 77 | 7.9  | 7    | 7.45 | 95  | 8  | 0.89 | 235 | 165 | 55 | 157 | 5.4 | 1 |
| 1 | 51 | 26.1 | 98   | 2 | 2 | 2 | 0 | 0 | 0 | 121 | 76  | 72 | 6.9  | 6.8  | 6.85 | 113 | 13 | 0.75 | 193 | 130 | 57 | 116 | 5.5 | 0 |
| 1 | 53 | 24.0 | 83   | 2 | 1 | 1 | 1 | 0 | 1 | 126 | 89  | 59 | 7.4  | 7.3  | 7.35 | 112 | 16 | 0.91 | 149 | 207 | 43 | 83  | 5.7 | 1 |
| 2 | 61 | 25.4 | 90   | 1 | 1 | 1 | 0 | 0 | 0 | 126 | 75  | 71 | 7.9  | 7.8  | 7.85 | 105 | 18 | 0.71 | 205 | 66  | 85 | 120 | 5.4 | 0 |
| 1 | 51 | 22.3 | 85   | 2 | 2 | 2 | 1 | 0 | 1 | 136 | 91  | 62 | 7.9  | 7.7  | 7.8  | 94  | 11 | 0.88 | 209 | 212 | 46 | 130 | 5.5 | 1 |
| 2 | 59 | 24.5 | 85.5 | 1 | 1 | 1 | 0 | 0 | 0 | 117 | 75  | 59 | 7.4  | 7.5  | 7.45 | 97  | 11 | 0.67 | 199 | 80  | 70 | 121 | 5.1 | 1 |
| 1 | 51 | 26.4 | 92   | 2 | 1 | 2 | 0 | 0 | 0 | 119 | 76  | 62 | 7.8  | 7.7  | 7.75 | 104 | 17 | 1.06 | 227 | 100 | 42 | 157 | 5.8 | 1 |
| 1 | 57 | 24.9 | 95.6 | 1 | 1 | 2 | 1 | 0 | 1 | 135 | 96  | 84 | 8.2  | 7.9  | 8.05 | 116 | 10 | 0.66 | 239 | 284 | 51 | 155 | 5.6 | 1 |
| 1 | 58 | 26.3 | 91.5 | 2 | 1 | 2 | 1 | 0 | 0 | 133 | 85  | 55 | 8    | 7.4  | 7.7  | 110 | 16 | 0.91 | 202 | 115 | 60 | 122 | 5.6 | 0 |
| 1 | 47 | 25.5 | 94   | 1 | 1 | 1 | 1 | 1 | 1 | 140 | 101 | 67 | 7.9  | 7.3  | 7.6  | 112 | 23 | 1.11 | 197 | 205 | 50 | 108 | 6.5 | 0 |
| 1 | 55 | 21.5 | 80   | 2 | 2 | 2 | 0 | 0 | 0 | 115 | 70  | 54 | 7.3  | 7.2  | 7.25 | 94  | 18 | 0.92 | 214 | 161 | 51 | 131 | 5.4 | 1 |
| 1 | 53 | 23.3 | 83   | 2 | 1 | 2 | 1 | 0 | 1 | 129 | 82  | 46 | 7.3  | 7.2  | 7.25 | 92  | 12 | 0.93 | 181 | 63  | 76 | 95  | 5.9 | 0 |
| 1 | 53 | 22.0 | 80   | 1 | 1 | 1 | 1 | 1 | 1 | 140 | 94  | 65 | 7.5  | 7.8  | 7.65 | 135 | 17 | 1.18 | 256 | 157 | 60 | 159 | 6.9 | 0 |
| 1 | 51 | 23.2 | 85   | 2 | 2 | 2 | 0 | 1 | 1 | 113 | 80  | 66 | 8.3  | 8.2  | 8.25 | 148 | 16 | 0.76 | 105 | 65  | 44 | 64  | 7.4 | 0 |
| 2 | 60 | 23.8 | 84.8 | 1 | 1 | 1 | 0 | 0 | 1 | 125 | 75  | 54 | 7.3  | 7.7  | 7.5  | 101 | 18 | 0.73 | 214 | 90  | 55 | 150 | 5.6 | 0 |
| 1 | 52 | 25.2 | 90   | 1 | 1 | 2 | 0 | 0 | 0 | 120 | 80  | 55 | 8.2  | 8.3  | 8.25 | 95  | 10 | 1    | 161 | 55  | 66 | 93  | 5.8 | 1 |
| 1 | 44 | 23.0 | 87.6 | 2 | 1 | 2 | 0 | 0 | 1 | 129 | 76  | 65 | 7.9  | 8.2  | 8.05 | 113 | 14 | 0.95 | 146 | 228 | 45 | 83  | 5.4 | 0 |
| 1 | 52 | 23.1 | 92   | 2 | 2 | 1 | 1 | 0 | 0 | 133 | 94  | 65 | 8    | 8    | 8    | 104 | 15 | 0.84 | 168 | 149 | 52 | 103 | 4.8 | 0 |
| 2 | 58 | 22.2 | 75   | 1 | 1 | 2 | 0 | 0 | 0 | 116 | 64  | 46 | 7.9  | 7.8  | 7.85 | 97  | 13 | 0.71 | 215 | 98  | 77 | 126 | 5.5 | 0 |
| 1 | 67 | 24.4 | 88   | 2 | 1 | 1 | 0 | 0 | 0 | 119 | 77  | 59 | 14.8 | 11.2 | 13   | 102 | 16 | 1.03 | 196 | 159 | 47 | 125 | 5.9 | 0 |
| 1 | 70 | 26.2 | 92   | 2 | 2 | 2 | 1 | 0 | 0 | 141 | 91  | 47 | 6.6  | 6.8  | 6.7  | 103 | 15 | 1.14 | 197 | 79  | 68 | 124 | 6   | 0 |
| 1 | 48 | 25.3 | 90.5 | 2 | 2 | 1 | 1 | 0 | 0 | 145 | 99  | 72 | 7.5  | 7.6  | 7.55 | 98  | 14 | 0.82 | 222 | 134 | 48 | 155 | 5.4 | 1 |
| 1 | 65 | 23.3 | 90   | 1 | 1 | 2 | 1 | 1 | 1 | 137 | 84  | 65 | 9.4  | 9.3  | 9.35 | 136 | 16 | 0.79 | 179 | 165 | 45 | 104 | 6.1 | 0 |
| 1 | 52 | 23.1 | 83   | 2 | 2 | 1 | 0 | 0 | 0 | 130 | 86  | 70 | 7.2  | 7    | 7.1  | 97  | 15 | 1.09 | 182 | 79  | 49 | 122 | 5   | 1 |
| 1 | 72 | 21.1 | 78   | 2 | 2 | 2 | 0 | 1 | 0 | 120 | 75  | 54 | 9.8  | 10.2 | 10   | 164 | 22 | 0.69 | 159 | 68  | 67 | 84  | 6.5 | 0 |
| 1 | 70 | 23.1 | 87.2 | 2 | 2 | 2 | 1 | 0 | 1 | 149 | 95  | 69 | 7.9  | 7.8  | 7.85 | 107 | 13 | 0.74 | 166 | 130 | 48 | 107 | 5.9 | 1 |

|   |    |      |       |   |   |   |   |   |   |     |     |    |     |     |      |     |    |      |     |     |    |     |     |   |
|---|----|------|-------|---|---|---|---|---|---|-----|-----|----|-----|-----|------|-----|----|------|-----|-----|----|-----|-----|---|
| 1 | 46 | 24.6 | 85    | 1 | 1 | 2 | 0 | 0 | 1 | 114 | 75  | 62 | 7.7 | 7.7 | 7.7  | 98  | 13 | 0.83 | 153 | 348 | 35 | 91  | 5.2 | 0 |
| 1 | 49 | 29.4 | 95    | 2 | 2 | 2 | 1 | 0 | 1 | 169 | 115 | 66 | 6.8 | 6.9 | 6.85 | 102 | 12 | 0.77 | 271 | 167 | 52 | 187 | 5.3 | 0 |
| 2 | 54 | 24.6 | 86    | 1 | 1 | 1 | 1 | 0 | 0 | 136 | 91  | 59 | 6.8 | 6.4 | 6.6  | 86  | 17 | 0.62 | 190 | 61  | 58 | 114 | 5.6 | 1 |
| 1 | 49 | 29.9 | 103.3 | 2 | 2 | 2 | 1 | 0 | 1 | 134 | 93  | 72 | 7.5 | 7.2 | 7.35 | 95  | 16 | 0.96 | 216 | 362 | 44 | 108 | 5.3 | 1 |
| 1 | 54 | 21.9 | 78.4  | 2 | 1 | 1 | 0 | 0 | 0 | 110 | 75  | 67 | 8.8 | 9   | 8.9  | 84  | 13 | 0.96 | 207 | 41  | 56 | 153 | 5.1 | 1 |
| 1 | 50 | 23.5 | 83    | 2 | 1 | 1 | 1 | 0 | 0 | 117 | 84  | 52 | 7.2 | 7.2 | 7.2  | 89  | 23 | 0.99 | 172 | 74  | 41 | 122 | 5.3 | 0 |
| 2 | 53 | 28.3 | 93    | 1 | 1 | 1 | 1 | 0 | 0 | 133 | 90  | 58 | 7.6 | 7.5 | 7.55 | 116 | 18 | 0.6  | 207 | 161 | 48 | 143 | 6.2 | 1 |
| 1 | 63 | 21.6 | 80    | 2 | 2 | 1 | 1 | 0 | 0 | 135 | 104 | 88 | 9.6 | 9.1 | 9.35 | 88  | 11 | 0.72 | 168 | 58  | 82 | 74  | 5.3 | 1 |
| 1 | 60 | 24.0 | 85    | 2 | 1 | 2 | 1 | 1 | 1 | 148 | 98  | 64 | 11  | 10  | 10.5 | 115 | 17 | 0.9  | 176 | 181 | 38 | 110 | 6.1 | 1 |
| 1 | 49 | 23.4 | 85.5  | 2 | 1 | 2 | 1 | 0 | 1 | 142 | 96  | 60 | 7.2 | 7.2 | 7.2  | 104 | 11 | 1.05 | 238 | 98  | 43 | 169 | 5.6 | 1 |
| 1 | 49 | 30.4 | 104   | 2 | 1 | 2 | 1 | 0 | 0 | 147 | 111 | 65 | 7.3 | 6.8 | 7.05 | 108 | 17 | 1.11 | 180 | 156 | 48 | 121 | 5.4 | 1 |
| 1 | 58 | 22.5 | 85    | 2 | 1 | 2 | 0 | 1 | 0 | 120 | 85  | 60 | 8.1 | 8.7 | 8.4  | 128 | 16 | 0.97 | 169 | 95  | 66 | 96  | 6.5 | 1 |
| 1 | 56 | 28.7 | 93    | 1 | 1 | 2 | 0 | 0 | 0 | 130 | 85  | 74 | 7.9 | 7.9 | 7.9  | 117 | 14 | 0.71 | 201 | 164 | 46 | 127 | 5.6 | 1 |
| 1 | 63 | 24.6 | 87    | 2 | 1 | 2 | 0 | 0 | 1 | 122 | 79  | 55 | 8.6 | 8.7 | 8.65 | 91  | 23 | 0.89 | 224 | 135 | 40 | 160 | 5.5 | 1 |
| 1 | 46 | 24.2 | 85    | 2 | 2 | 1 | 0 | 0 | 0 | 130 | 85  | 70 | 6.8 | 7   | 6.9  | 96  | 15 | 0.72 | 191 | 52  | 67 | 100 | 5.4 | 0 |
| 1 | 54 | 25.0 | 90.5  | 1 | 1 | 1 | 1 | 0 | 0 | 132 | 97  | 61 | 8.7 | 8.6 | 8.65 | 99  | 13 | 0.82 | 235 | 91  | 78 | 153 | 5   | 0 |
| 1 | 74 | 21.5 | 83    | 1 | 1 | 2 | 1 | 1 | 1 | 145 | 90  | 56 | 9.5 | 9.6 | 9.55 | 121 | 16 | 0.7  | 192 | 108 | 54 | 118 | 7.2 | 1 |
| 1 | 63 | 25.4 | 89.5  | 2 | 2 | 1 | 1 | 0 | 1 | 143 | 101 | 70 | 9.5 | 8   | 8.75 | 94  | 21 | 0.93 | 186 | 219 | 46 | 113 | 5.3 | 1 |
| 1 | 54 | 23.5 | 86    | 2 | 1 | 1 | 0 | 1 | 1 | 122 | 83  | 64 | 7.3 | 7.3 | 7.3  | 137 | 13 | 0.77 | 203 | 102 | 63 | 128 | 6.5 | 0 |
| 1 | 54 | 20.6 | 76    | 2 | 1 | 2 | 0 | 0 | 0 | 123 | 83  | 53 | 6.4 | 6.4 | 6.4  | 99  | 21 | 0.96 | 200 | 71  | 84 | 94  | 5.5 | 0 |
| 1 | 55 | 26.7 | 89    | 2 | 1 | 2 | 1 | 1 | 0 | 133 | 93  | 71 | 8.4 | 8.4 | 8.4  | 147 | 17 | 0.95 | 142 | 94  | 53 | 78  | 7.7 | 0 |
| 1 | 45 | 24.2 | 87.5  | 1 | 1 | 1 | 0 | 0 | 0 | 107 | 76  | 73 | 8.9 | 8.4 | 8.65 | 93  | 12 | 0.91 | 228 | 105 | 43 | 157 | 5.6 | 1 |
| 1 | 47 | 24.0 | 86.7  | 2 | 1 | 1 | 0 | 0 | 1 | 126 | 82  | 74 | 6.4 | 6.6 | 6.5  | 94  | 14 | 0.93 | 241 | 71  | 56 | 174 | 5.7 | 1 |
| 1 | 49 | 21.4 | 81    | 1 | 1 | 2 | 0 | 0 | 0 | 106 | 72  | 56 | 6.8 | 6.8 | 6.8  | 87  | 19 | 1.12 | 166 | 72  | 52 | 104 | 5.4 | 1 |
| 1 | 45 | 25.5 | 89    | 2 | 2 | 2 | 0 | 0 | 1 | 131 | 89  | 69 | 7.6 | 7.4 | 7.5  | 99  | 14 | 1.28 | 287 | 212 | 59 | 181 | 5.6 | 1 |
| 1 | 58 | 22.2 | 80    | 2 | 1 | 1 | 1 | 0 | 1 | 149 | 108 | 59 | 8.2 | 8   | 8.1  | 97  | 18 | 1.16 | 187 | 138 | 56 | 105 | 5.9 | 0 |
| 1 | 47 | 21.7 | 79.6  | 2 | 1 | 1 | 0 | 0 | 0 | 101 | 67  | 56 | 7.4 | 7.7 | 7.55 | 93  | 12 | 0.9  | 193 | 88  | 48 | 131 | 5.7 | 0 |
| 1 | 55 | 28.4 | 101   | 2 | 2 | 1 | 1 | 0 | 1 | 137 | 84  | 56 | 6.6 | 6.8 | 6.7  | 122 | 18 | 0.99 | 183 | 167 | 53 | 109 | 6.1 | 1 |
| 1 | 48 | 25.5 | 93    | 2 | 2 | 1 | 0 | 0 | 1 | 129 | 81  | 64 | 6.7 | 6.7 | 6.7  | 107 | 11 | 0.78 | 176 | 116 | 45 | 121 | 6   | 1 |

|   |    |      |      |   |   |   |   |   |   |     |     |    |     |     |      |     |    |      |     |     |    |     |     |   |
|---|----|------|------|---|---|---|---|---|---|-----|-----|----|-----|-----|------|-----|----|------|-----|-----|----|-----|-----|---|
| 1 | 57 | 22.1 | 83   | 2 | 1 | 2 | 0 | 0 | 1 | 108 | 76  | 57 | 7.9 | 7.7 | 7.8  | 90  | 11 | 0.92 | 232 | 116 | 41 | 178 | 5.9 | 1 |
| 1 | 56 | 26.9 | 92   | 2 | 2 | 2 | 0 | 0 | 0 | 112 | 65  | 50 | 6.9 | 6.7 | 6.8  | 88  | 16 | 0.98 | 212 | 70  | 67 | 132 | 5.2 | 1 |
| 1 | 50 | 23.7 | 87.5 | 2 | 1 | 2 | 0 | 0 | 1 | 106 | 71  | 62 | 7.9 | 7.9 | 7.9  | 94  | 15 | 0.97 | 129 | 60  | 37 | 86  | 5.5 | 1 |
| 2 | 52 | 27.4 | 86   | 1 | 1 | 2 | 1 | 1 | 1 | 148 | 89  | 61 | 9.7 | 8.4 | 9.05 | 127 | 20 | 0.62 | 211 | 258 | 49 | 131 | 7.8 | 0 |
| 1 | 54 | 32.4 | 109  | 2 | 2 | 2 | 1 | 1 | 1 | 135 | 88  | 76 | 6.4 | 6.9 | 6.65 | 157 | 14 | 0.89 | 176 | 162 | 54 | 98  | 6.3 | 0 |
| 1 | 56 | 27.1 | 99   | 2 | 1 | 2 | 1 | 1 | 0 | 105 | 71  | 48 | 7.2 | 7.2 | 7.2  | 129 | 16 | 0.81 | 164 | 86  | 49 | 102 | 6.6 | 1 |
| 1 | 56 | 25.9 | 83.8 | 2 | 2 | 2 | 0 | 0 | 1 | 113 | 75  | 62 | 6.9 | 7   | 6.95 | 105 | 15 | 1.03 | 248 | 79  | 80 | 156 | 5.1 | 1 |
| 1 | 54 | 26.4 | 94.5 | 2 | 1 | 2 | 0 | 1 | 1 | 129 | 85  | 48 | 7.3 | 7.4 | 7.35 | 134 | 12 | 0.81 | 155 | 147 | 39 | 93  | 6.6 | 1 |
| 2 | 53 | 28.8 | 95   | 1 | 1 | 2 | 0 | 0 | 1 | 118 | 82  | 74 | 5.7 | 5.9 | 5.8  | 89  | 10 | 0.69 | 165 | 80  | 50 | 99  | 5.7 | 0 |
| 2 | 58 | 22.1 | 75   | 1 | 1 | 2 | 0 | 0 | 0 | 111 | 76  | 56 | 7.7 | 7.6 | 7.65 | 87  | 14 | 0.68 | 199 | 107 | 68 | 108 | 5.6 | 1 |
| 1 | 50 | 22.8 | 83   | 2 | 1 | 2 | 0 | 0 | 0 | 133 | 86  | 59 | 7.5 | 7.6 | 7.55 | 114 | 22 | 0.77 | 184 | 80  | 49 | 121 | 6.3 | 0 |
| 1 | 52 | 26.4 | 93.5 | 2 | 2 | 2 | 1 | 1 | 1 | 135 | 92  | 62 | 7.2 | 7.1 | 7.15 | 140 | 13 | 0.99 | 249 | 432 | 35 | 146 | 6.5 | 1 |
| 1 | 49 | 26.9 | 94   | 2 | 1 | 2 | 0 | 0 | 0 | 128 | 86  | 66 | 7.4 | 7.3 | 7.35 | 106 | 11 | 0.96 | 228 | 110 | 49 | 153 | 5.5 | 1 |
| 1 | 51 | 22.0 | 82   | 2 | 2 | 1 | 0 | 0 | 0 | 122 | 87  | 60 | 8.8 | 8.3 | 8.55 | 107 | 15 | 0.94 | 206 | 62  | 55 | 137 | 5.4 | 1 |
| 1 | 49 | 25.5 | 83   | 2 | 1 | 1 | 1 | 0 | 1 | 144 | 107 | 67 | 7.1 | 7.1 | 7.1  | 94  | 15 | 0.83 | 229 | 152 | 53 | 162 | 5.9 | 1 |
| 1 | 71 | 26.8 | 89   | 2 | 2 | 2 | 0 | 0 | 1 | 132 | 90  | 63 | 7.9 | 8.4 | 8.15 | 106 | 16 | 1    | 204 | 92  | 57 | 128 | 6.1 | 1 |
| 1 | 45 | 23.2 | 86   | 2 | 1 | 2 | 0 | 0 | 0 | 112 | 68  | 60 | 8   | 7.9 | 7.95 | 101 | 13 | 0.82 | 183 | 141 | 49 | 116 | 5.9 | 0 |
| 1 | 55 | 23.7 | 87   | 1 | 1 | 2 | 0 | 0 | 1 | 126 | 86  | 58 | 6.9 | 7   | 6.95 | 98  | 15 | 0.8  | 211 | 215 | 35 | 144 | 5.4 | 1 |
| 1 | 60 | 24.9 | 93.5 | 2 | 1 | 2 | 1 | 1 | 1 | 155 | 95  | 68 | 8.4 | 8.4 | 8.4  | 141 | 17 | 0.89 | 126 | 45  | 58 | 61  | 6.6 | 1 |
| 1 | 58 | 25.7 | 89   | 2 | 2 | 2 | 1 | 0 | 1 | 137 | 88  | 48 | 7.9 | 7.9 | 7.9  | 104 | 17 | 0.91 | 241 | 180 | 76 | 145 | 5.7 | 1 |
| 1 | 55 | 21.6 | 83   | 2 | 1 | 2 | 0 | 0 | 0 | 115 | 69  | 58 | 7.2 | 7.1 | 7.15 | 91  | 14 | 0.87 | 236 | 178 | 58 | 153 | 5.2 | 1 |
| 1 | 56 | 27.0 | 90   | 1 | 2 | 2 | 1 | 0 | 0 | 169 | 96  | 57 | 7.8 | 7.8 | 7.8  | 114 | 15 | 0.8  | 155 | 60  | 44 | 110 | 5.7 | 1 |
| 2 | 54 | 21.6 | 80   | 1 | 1 | 2 | 1 | 0 | 0 | 140 | 86  | 64 | 7.2 | 7.2 | 7.2  | 91  | 14 | 0.68 | 183 | 69  | 69 | 114 | 5.4 | 0 |
| 1 | 53 | 22.7 | 82.8 | 2 | 2 | 2 | 1 | 0 | 0 | 137 | 90  | 99 | 9.8 | 8.6 | 9.2  | 87  | 13 | 1.17 | 170 | 60  | 48 | 111 | 5.4 | 1 |
| 1 | 44 | 24.1 | 86.1 | 1 | 1 | 1 | 0 | 0 | 0 | 113 | 76  | 67 | 6.5 | 6.5 | 6.5  | 77  | 15 | 0.99 | 215 | 119 | 47 | 156 | 5.2 | 0 |
| 1 | 53 | 28.4 | 108  | 2 | 1 | 2 | 0 | 0 | 0 | 120 | 89  | 65 | 8   | 7.7 | 7.85 | 95  | 25 | 1.16 | 208 | 158 | 41 | 142 | 5.8 | 1 |
| 1 | 55 | 22.5 | 83.5 | 2 | 1 | 2 | 1 | 0 | 0 | 137 | 88  | 68 | 8.6 | 7.8 | 8.2  | 111 | 14 | 0.96 | 202 | 109 | 54 | 132 | 5.5 | 1 |
| 1 | 48 | 26.2 | 91.5 | 2 | 1 | 1 | 1 | 0 | 1 | 119 | 82  | 58 | 7.3 | 7.2 | 7.25 | 98  | 15 | 0.79 | 123 | 103 | 50 | 57  | 5.5 | 0 |
| 1 | 64 | 20.9 | 76   | 2 | 1 | 2 | 0 | 0 | 0 | 136 | 93  | 75 | 7.9 | 7.8 | 7.85 | 107 | 13 | 0.77 | 180 | 95  | 44 | 134 | 5.4 | 0 |

|   |    |      |      |   |   |   |   |   |   |     |     |    |      |     |      |     |    |      |     |     |    |     |     |   |
|---|----|------|------|---|---|---|---|---|---|-----|-----|----|------|-----|------|-----|----|------|-----|-----|----|-----|-----|---|
| 1 | 61 | 27.0 | 93   | 1 | 1 | 1 | 1 | 1 | 1 | 133 | 90  | 70 | 10.3 | 9.4 | 9.85 | 111 | 13 | 0.89 | 127 | 133 | 42 | 86  | 8.5 | 1 |
| 1 | 61 | 26.5 | 96   | 2 | 1 | 2 | 0 | 0 | 1 | 122 | 82  | 60 | 7.8  | 8.1 | 7.95 | 97  | 16 | 0.98 | 193 | 124 | 36 | 139 | 6.3 | 1 |
| 1 | 58 | 27.3 | 92.5 | 2 | 1 | 2 | 1 | 1 | 0 | 143 | 89  | 72 | 7    | 6.7 | 6.85 | 197 | 14 | 0.65 | 185 | 93  | 61 | 111 | 8   | 1 |
| 1 | 52 | 24.1 | 94   | 2 | 2 | 2 | 1 | 0 | 0 | 125 | 93  | 66 | 7.2  | 7.1 | 7.15 | 114 | 15 | 1.04 | 214 | 140 | 51 | 141 | 5.9 | 1 |
| 1 | 58 | 20.2 | 80   | 1 | 1 | 2 | 0 | 0 | 1 | 114 | 81  | 58 | 8.2  | 7.7 | 7.95 | 83  | 18 | 0.93 | 179 | 291 | 41 | 74  | 5.4 | 0 |
| 1 | 50 | 25.9 | 90   | 2 | 2 | 2 | 1 | 0 | 1 | 161 | 105 | 66 | 7.4  | 7.4 | 7.4  | 90  | 14 | 0.96 | 253 | 201 | 63 | 151 | 5.3 | 1 |
| 1 | 52 | 26.0 | 93.5 | 2 | 2 | 1 | 1 | 1 | 0 | 145 | 97  | 52 | 8    | 8.2 | 8.1  | 151 | 20 | 0.89 | 207 | 182 | 54 | 127 | 6.9 | 1 |
| 1 | 60 | 30.5 | 103  | 2 | 1 | 2 | 1 | 0 | 1 | 140 | 88  | 61 | 9.2  | 8.9 | 9.05 | 87  | 17 | 0.78 | 159 | 78  | 38 | 112 | 6.4 | 1 |
| 1 | 49 | 26.4 | 94   | 2 | 2 | 1 | 1 | 0 | 1 | 121 | 89  | 68 | 7.2  | 6.9 | 7.05 | 102 | 14 | 1.06 | 202 | 276 | 37 | 136 | 5.6 | 1 |
| 1 | 48 | 25.8 | 90   | 1 | 2 | 2 | 1 | 0 | 0 | 119 | 85  | 63 | 7    | 7   | 7    | 99  | 14 | 0.98 | 164 | 121 | 46 | 101 | 5.4 | 0 |
| 2 | 54 | 21.6 | 71   | 1 | 1 | 2 | 0 | 0 | 0 | 115 | 75  | 70 | 7.4  | 7.7 | 7.55 | 94  | 22 | 0.8  | 195 | 67  | 51 | 141 | 5.6 | 1 |
| 1 | 58 | 24.5 | 87   | 2 | 1 | 2 | 0 | 0 | 1 | 121 | 79  | 54 | 7.5  | 7.3 | 7.4  | 75  | 13 | 0.99 | 212 | 57  | 57 | 139 | 5.6 | 1 |
| 1 | 50 | 24.4 | 89.5 | 2 | 2 | 2 | 1 | 0 | 0 | 124 | 83  | 52 | 7.7  | 8.2 | 7.95 | 101 | 10 | 1.11 | 202 | 89  | 72 | 111 | 5.4 | 0 |
| 1 | 57 | 26.2 | 91   | 2 | 2 | 2 | 0 | 0 | 1 | 119 | 89  | 59 | 8    | 7.8 | 7.9  | 97  | 12 | 0.77 | 281 | 115 | 73 | 194 | 5.6 | 1 |
| 1 | 57 | 22.0 | 82.5 | 1 | 1 | 1 | 1 | 0 | 1 | 131 | 90  | 67 | 8.9  | 8.5 | 8.7  | 97  | 18 | 1.16 | 185 | 102 | 58 | 112 | 5.5 | 1 |
| 1 | 49 | 26.7 | 91.5 | 2 | 2 | 1 | 1 | 0 | 0 | 132 | 90  | 64 | 6.6  | 6.5 | 6.55 | 102 | 14 | 0.89 | 202 | 85  | 54 | 125 | 5.7 | 0 |
| 1 | 54 | 23.3 | 85   | 1 | 1 | 2 | 1 | 0 | 1 | 140 | 92  | 86 | 7.1  | 6.8 | 6.95 | 102 | 12 | 1.17 | 172 | 109 | 38 | 118 | 5.7 | 1 |
| 1 | 55 | 24.3 | 85   | 2 | 2 | 2 | 1 | 0 | 1 | 131 | 90  | 53 | 9.2  | 9.1 | 9.15 | 86  | 14 | 1.26 | 213 | 184 | 38 | 138 | 5.6 | 1 |
| 2 | 54 | 24.4 | 81.5 | 1 | 1 | 2 | 1 | 0 | 1 | 142 | 88  | 68 | 7.3  | 7.3 | 7.3  | 98  | 14 | 0.69 | 198 | 190 | 45 | 115 | 5.9 | 1 |
| 2 | 56 | 17.5 | 63   | 1 | 1 | 2 | 1 | 0 | 0 | 131 | 90  | 62 | 7.8  | 8.2 | 8    | 94  | 7  | 0.57 | 174 | 57  | 63 | 94  | 5.4 | 1 |
| 1 | 44 | 26.4 | 94   | 1 | 1 | 2 | 1 | 0 | 1 | 137 | 93  | 64 | 7.3  | 7.6 | 7.45 | 108 | 12 | 1.08 | 207 | 130 | 36 | 153 | 5.9 | 0 |
| 1 | 48 | 29.7 | 99   | 2 | 1 | 1 | 1 | 1 | 1 | 143 | 87  | 70 | 7.3  | 7.5 | 7.4  | 148 | 10 | 1.03 | 150 | 135 | 44 | 99  | 7.5 | 1 |
| 1 | 48 | 25.4 | 89   | 2 | 1 | 2 | 0 | 0 | 0 | 107 | 75  | 56 | 7.2  | 7   | 7.1  | 79  | 11 | 0.91 | 142 | 74  | 46 | 79  | 5.6 | 0 |
| 1 | 43 | 26.5 | 93   | 1 | 1 | 2 | 0 | 0 | 1 | 136 | 94  | 73 | 6.3  | 5.9 | 6.1  | 110 | 15 | 0.89 | 176 | 147 | 44 | 119 | 6   | 0 |
| 1 | 57 | 26.7 | 86   | 2 | 2 | 2 | 1 | 1 | 1 | 141 | 95  | 58 | 6.7  | 7.1 | 6.9  | 141 | 17 | 0.98 | 182 | 147 | 50 | 124 | 6.5 | 1 |
| 1 | 52 | 30.8 | 103  | 2 | 2 | 2 | 1 | 0 | 1 | 119 | 85  | 53 | 6.9  | 6.7 | 6.8  | 85  | 12 | 0.91 | 185 | 132 | 35 | 127 | 5.5 | 0 |
| 1 | 53 | 24.1 | 88   | 2 | 2 | 1 | 0 | 0 | 1 | 126 | 87  | 63 | 8    | 8.4 | 8.2  | 107 | 14 | 1.14 | 202 | 407 | 38 | 94  | 6.1 | 1 |
| 1 | 55 | 24.3 | 88   | 2 | 1 | 1 | 1 | 1 | 0 | 136 | 95  | 69 | 7.9  | 7.6 | 7.75 | 134 | 13 | 0.93 | 229 | 194 | 46 | 155 | 7.8 | 0 |
| 2 | 57 | 18.8 | 69   | 1 | 1 | 1 | 0 | 0 | 0 | 107 | 67  | 70 | 7.9  | 8   | 7.95 | 83  | 16 | 0.71 | 176 | 45  | 69 | 103 | 5.7 | 1 |

|   |    |      |      |   |   |   |   |   |   |     |     |    |      |     |      |     |    |      |     |     |    |     |     |   |
|---|----|------|------|---|---|---|---|---|---|-----|-----|----|------|-----|------|-----|----|------|-----|-----|----|-----|-----|---|
| 1 | 55 | 24.7 | 88   | 2 | 1 | 2 | 0 | 0 | 1 | 107 | 74  | 60 | 8.2  | 8.5 | 8.35 | 101 | 15 | 1.05 | 186 | 142 | 38 | 125 | 5.5 | 0 |
| 1 | 55 | 27.4 | 92   | 2 | 1 | 2 | 0 | 1 | 1 | 126 | 82  | 61 | 7.6  | 7.5 | 7.55 | 114 | 17 | 0.85 | 184 | 80  | 59 | 109 | 6.7 | 1 |
| 2 | 47 | 30.4 | 113  | 1 | 1 | 1 | 0 | 0 | 1 | 134 | 84  | 65 | 7.2  | 7.4 | 7.3  | 112 | 10 | 0.51 | 179 | 79  | 54 | 114 | 5.4 | 0 |
| 1 | 58 | 26.2 | 90   | 2 | 1 | 2 | 1 | 0 | 1 | 143 | 90  | 66 | 7    | 7.2 | 7.1  | 123 | 14 | 1.15 | 242 | 151 | 53 | 167 | 5.9 | 1 |
| 1 | 59 | 24.2 | 89   | 1 | 1 | 2 | 0 | 0 | 0 | 109 | 67  | 57 | 7.4  | 7.4 | 7.4  | 89  | 16 | 0.91 | 169 | 126 | 41 | 109 | 5.3 | 1 |
| 2 | 58 | 22.6 | 87.5 | 1 | 1 | 1 | 0 | 0 | 0 | 111 | 71  | 49 | 7.4  | 7.4 | 7.4  | 88  | 13 | 0.58 | 202 | 118 | 49 | 126 | 5.9 | 0 |
| 1 | 60 | 23.5 | 82   | 1 | 1 | 2 | 0 | 0 | 1 | 132 | 89  | 70 | 7.2  | 7.3 | 7.25 | 106 | 13 | 0.87 | 146 | 53  | 69 | 86  | 5.6 | 1 |
| 1 | 62 | 24.7 | 89   | 2 | 1 | 2 | 1 | 0 | 0 | 145 | 95  | 78 | 8.4  | 8.2 | 8.3  | 112 | 24 | 1.12 | 210 | 188 | 48 | 143 | 6   | 0 |
| 1 | 55 | 26.3 | 93   | 2 | 1 | 1 | 0 | 0 | 1 | 112 | 81  | 65 | 7.5  | 7.4 | 7.45 | 90  | 13 | 0.91 | 244 | 144 | 47 | 157 | 5.8 | 0 |
| 1 | 48 | 26.4 | 94   | 2 | 2 | 1 | 0 | 0 | 0 | 132 | 87  | 58 | 7.4  | 7.5 | 7.45 | 105 | 13 | 0.98 | 169 | 134 | 54 | 96  | 5.4 | 1 |
| 1 | 49 | 27.4 | 91   | 2 | 1 | 1 | 1 | 0 | 0 | 126 | 87  | 68 | 5.8  | 5.8 | 5.8  | 93  | 11 | 1.02 | 187 | 155 | 47 | 120 | 4.9 | 1 |
| 1 | 59 | 23.3 | 80   | 2 | 1 | 1 | 0 | 0 | 0 | 114 | 76  | 55 | 7.4  | 7.6 | 7.5  | 99  | 20 | 1.01 | 135 | 101 | 43 | 77  | 5.4 | 1 |
| 1 | 54 | 24.3 | 81   | 2 | 1 | 2 | 1 | 1 | 1 | 125 | 89  | 57 | 6.8  | 7.1 | 6.95 | 111 | 9  | 0.85 | 135 | 95  | 52 | 75  | 6.3 | 0 |
| 1 | 60 | 23.0 | 83.6 | 2 | 2 | 1 | 1 | 0 | 0 | 132 | 95  | 50 | 7.9  | 7.8 | 7.85 | 94  | 15 | 0.74 | 165 | 48  | 69 | 102 | 5.6 | 1 |
| 1 | 55 | 21.2 | 83   | 2 | 1 | 2 | 0 | 1 | 0 | 117 | 79  | 57 | 8.2  | 8.3 | 8.25 | 127 | 18 | 0.85 | 184 | 162 | 48 | 117 | 6   | 0 |
| 1 | 58 | 22.3 | 80   | 2 | 1 | 2 | 0 | 1 | 0 | 137 | 89  | 55 | 8.4  | 8.2 | 8.3  | 130 | 16 | 0.95 | 209 | 51  | 99 | 109 | 6.1 | 0 |
| 2 | 57 | 22.7 | 79   | 1 | 1 | 2 | 1 | 0 | 0 | 138 | 109 | 84 | 8.9  | 8.6 | 8.75 | 103 | 15 | 0.59 | 210 | 60  | 65 | 132 | 5.6 | 1 |
| 1 | 47 | 20.4 | 70   | 1 | 1 | 2 | 0 | 0 | 1 | 109 | 75  | 51 | 7.8  | 8   | 7.9  | 84  | 14 | 1.08 | 241 | 60  | 57 | 156 | 5.5 | 0 |
| 1 | 53 | 22.1 | 84.5 | 2 | 1 | 2 | 0 | 0 | 1 | 121 | 88  | 64 | 7.7  | 7.5 | 7.6  | 97  | 11 | 0.93 | 175 | 95  | 41 | 122 | 5.9 | 1 |
| 2 | 55 | 23.1 | 86   | 1 | 1 | 1 | 0 | 0 | 0 | 136 | 84  | 59 | 6.8  | 6.6 | 6.7  | 92  | 11 | 0.57 | 216 | 162 | 56 | 138 | 5.8 | 1 |
| 1 | 59 | 21.8 | 78   | 2 | 2 | 1 | 0 | 0 | 0 | 120 | 82  | 55 | 7.2  | 7.3 | 7.25 | 98  | 16 | 1.15 | 232 | 163 | 43 | 158 | 5.5 | 1 |
| 2 | 54 | 26.1 | 85   | 1 | 1 | 2 | 1 | 1 | 1 | 139 | 91  | 69 | 6.6  | 6.4 | 6.5  | 110 | 14 | 0.7  | 194 | 80  | 36 | 153 | 6.2 | 1 |
| 2 | 52 | 18.7 | 66   | 1 | 1 | 2 | 0 | 0 | 1 | 105 | 69  | 61 | 7.9  | 7.9 | 7.9  | 78  | 19 | 0.62 | 256 | 116 | 62 | 150 | 5.5 | 1 |
| 1 | 56 | 23.7 | 88.2 | 2 | 1 | 2 | 1 | 0 | 0 | 110 | 79  | 63 | 7.2  | 7.2 | 7.2  | 86  | 21 | 0.97 | 185 | 68  | 66 | 112 | 5.1 | 1 |
| 1 | 66 | 22.7 | 84   | 2 | 1 | 2 | 1 | 0 | 1 | 137 | 90  | 77 | 7.9  | 7.9 | 7.9  | 108 | 14 | 0.88 | 205 | 166 | 37 | 150 | 5.3 | 0 |
| 1 | 51 | 21.6 | 82.5 | 2 | 2 | 2 | 1 | 1 | 0 | 128 | 83  | 69 | 8.6  | 8.8 | 8.7  | 127 | 11 | 0.89 | 179 | 131 | 91 | 91  | 6.3 | 1 |
| 1 | 52 | 18.5 | 70.5 | 2 | 2 | 1 | 0 | 1 | 0 | 124 | 84  | 76 | 8    | 7.8 | 7.9  | 138 | 11 | 0.91 | 186 | 120 | 81 | 98  | 5.7 | 1 |
| 2 | 74 | 23.5 | 83   | 1 | 1 | 2 | 1 | 0 | 1 | 126 | 72  | 63 | 10.2 | 10  | 10.1 | 91  | 24 | 1.06 | 146 | 97  | 45 | 89  | 5.6 | 0 |
| 1 | 49 | 19.2 | 74.5 | 2 | 2 | 2 | 0 | 0 | 1 | 111 | 84  | 59 | 8.6  | 8.7 | 8.65 | 107 | 17 | 0.98 | 146 | 266 | 48 | 81  | 5.2 | 0 |

|   |    |      |      |   |   |   |   |   |   |     |     |    |     |     |      |     |    |      |     |     |     |     |      |   |
|---|----|------|------|---|---|---|---|---|---|-----|-----|----|-----|-----|------|-----|----|------|-----|-----|-----|-----|------|---|
| 1 | 49 | 28.1 | 96   | 2 | 2 | 1 | 1 | 0 | 1 | 128 | 87  | 65 | 6.5 | 6.3 | 6.4  | 97  | 12 | 0.92 | 237 | 156 | 47  | 160 | 5.4  | 1 |
| 1 | 51 | 26.3 | 89   | 1 | 2 | 2 | 0 | 0 | 0 | 129 | 88  | 50 | 5.9 | 5.9 | 5.9  | 108 | 20 | 1.01 | 177 | 58  | 50  | 119 | 5.4  | 1 |
| 1 | 56 | 22.6 | 84   | 2 | 2 | 2 | 0 | 0 | 0 | 119 | 70  | 57 | 7.9 | 7.8 | 7.85 | 107 | 13 | 0.81 | 216 | 177 | 45  | 129 | 5.5  | 1 |
| 1 | 66 | 26.0 | 98   | 2 | 1 | 1 | 1 | 0 | 0 | 135 | 94  | 65 | 7   | 7   | 7    | 95  | 15 | 0.94 | 163 | 68  | 60  | 103 | 5.4  | 1 |
| 1 | 59 | 23.9 | 91   | 2 | 2 | 2 | 1 | 0 | 1 | 144 | 102 | 55 | 9.6 | 8.7 | 9.15 | 92  | 14 | 1.2  | 245 | 113 | 45  | 161 | 6.1  | 1 |
| 1 | 48 | 26.7 | 89   | 1 | 2 | 2 | 0 | 0 | 0 | 137 | 86  | 71 | 7.2 | 6.8 | 7    | 92  | 13 | 1    | 170 | 70  | 42  | 119 | 5.8  | 1 |
| 2 | 71 | 21.9 | 84   | 1 | 1 | 1 | 1 | 0 | 1 | 119 | 74  | 61 | 9.2 | 9.1 | 9.15 | 82  | 12 | 0.57 | 146 | 136 | 45  | 77  | 5.5  | 1 |
| 1 | 60 | 20.8 | 82   | 2 | 2 | 2 | 0 | 1 | 0 | 127 | 85  | 67 | 8.8 | 9.2 | 9    | 156 | 16 | 0.83 | 135 | 193 | 41  | 67  | 7.5  | 1 |
| 2 | 52 | 17.7 | 67   | 1 | 1 | 2 | 0 | 0 | 0 | 127 | 79  | 86 | 6.9 | 6.8 | 6.85 | 97  | 13 | 0.51 | 207 | 31  | 117 | 95  | 5.4  | 1 |
| 1 | 53 | 24.7 | 88   | 2 | 1 | 2 | 1 | 1 | 1 | 116 | 79  | 73 | 7.3 | 7   | 7.15 | 128 | 14 | 0.91 | 216 | 212 | 48  | 138 | 6.4  | 0 |
| 1 | 54 | 21.4 | 77   | 2 | 1 | 2 | 1 | 0 | 0 | 105 | 73  | 55 | 7.6 | 7.4 | 7.5  | 123 | 16 | 1.1  | 108 | 89  | 40  | 60  | 5.8  | 1 |
| 1 | 53 | 24.8 | 87.5 | 1 | 1 | 2 | 0 | 0 | 1 | 123 | 85  | 56 | 7.7 | 7.8 | 7.75 | 92  | 12 | 1.08 | 198 | 203 | 46  | 112 | 5.9  | 0 |
| 1 | 61 | 27.8 | 104  | 1 | 1 | 2 | 0 | 0 | 0 | 117 | 83  | 48 | 8.9 | 9.2 | 9.05 | 118 | 15 | 1.05 | 151 | 83  | 47  | 86  | 6.1  | 1 |
| 1 | 56 | 23.5 | 83.5 | 2 | 1 | 1 | 1 | 0 | 0 | 106 | 75  | 56 | 6.6 | 6.5 | 6.55 | 87  | 17 | 1.08 | 135 | 49  | 48  | 86  | 5.3  | 1 |
| 2 | 56 | 24.1 | 86.5 | 1 | 1 | 2 | 0 | 0 | 0 | 122 | 89  | 81 | 9.4 | 8.5 | 8.95 | 96  | 15 | 0.89 | 228 | 74  | 63  | 152 | 5.8  | 0 |
| 1 | 56 | 24.8 | 93.5 | 2 | 1 | 2 | 1 | 0 | 1 | 134 | 95  | 68 | 8   | 7.7 | 7.85 | 90  | 17 | 0.79 | 163 | 137 | 38  | 105 | 5    | 1 |
| 2 | 58 | 22.5 | 79   | 1 | 1 | 1 | 0 | 0 | 0 | 106 | 76  | 60 | 7.6 | 7.7 | 7.65 | 93  | 19 | 0.74 | 231 | 81  | 70  | 148 | 5.5  | 1 |
| 1 | 53 | 26.7 | 98.5 | 2 | 1 | 2 | 0 | 0 | 1 | 119 | 82  | 65 | 7.1 | 7.1 | 7.1  | 98  | 10 | 0.9  | 199 | 153 | 34  | 135 | 5.5  | 1 |
| 2 | 51 | 19.2 | 74   | 1 | 1 | 2 | 0 | 0 | 0 | 123 | 77  | 59 | 7.2 | 7.2 | 7.2  | 88  | 12 | 0.63 | 201 | 80  | 63  | 119 | 5.4  | 0 |
| 1 | 50 | 25.8 | 91   | 2 | 1 | 2 | 1 | 1 | 1 | 103 | 71  | 62 | 7.3 | 7.4 | 7.35 | 261 | 14 | 0.77 | 196 | 137 | 34  | 140 | 12.6 | 0 |
| 1 | 54 | 25.5 | 80   | 2 | 2 | 2 | 1 | 0 | 0 | 133 | 90  | 63 | 7.3 | 7.1 | 7.2  | 104 | 14 | 0.76 | 211 | 89  | 74  | 121 | 5.6  | 0 |
| 1 | 49 | 25.4 | 92   | 2 | 2 | 1 | 0 | 0 | 0 | 119 | 72  | 69 | 7.5 | 7.5 | 7.5  | 107 | 16 | 0.9  | 193 | 112 | 43  | 125 | 5.8  | 1 |
| 1 | 42 | 25.9 | 89.3 | 2 | 2 | 1 | 0 | 0 | 1 | 128 | 87  | 77 | 7.1 | 6.9 | 7    | 101 | 15 | 1.06 | 234 | 82  | 49  | 177 | 5.7  | 0 |
| 2 | 51 | 21.2 | 77   | 1 | 1 | 2 | 0 | 0 | 1 | 102 | 65  | 55 | 6.6 | 6.6 | 6.6  | 86  | 15 | 0.64 | 236 | 98  | 55  | 163 | 5.2  | 0 |
| 1 | 59 | 26.2 | 88.5 | 2 | 1 | 1 | 1 | 0 | 0 | 134 | 96  | 72 | 8.8 | 8.4 | 8.6  | 105 | 19 | 0.85 | 196 | 137 | 58  | 112 | 5.1  | 1 |
| 1 | 48 | 23.5 | 84   | 2 | 2 | 2 | 0 | 0 | 0 | 123 | 85  | 82 | 7.1 | 7.2 | 7.15 | 93  | 13 | 0.85 | 209 | 137 | 68  | 126 | 5.7  | 0 |
| 1 | 55 | 25.8 | 88   | 2 | 1 | 1 | 1 | 0 | 1 | 112 | 75  | 56 | 8.9 | 8.7 | 8.8  | 100 | 18 | 0.96 | 149 | 80  | 55  | 89  | 5.8  | 1 |
| 1 | 49 | 24.2 | 92   | 2 | 2 | 2 | 1 | 1 | 1 | 128 | 91  | 67 | 7.6 | 7.5 | 7.55 | 114 | 16 | 0.62 | 161 | 66  | 39  | 118 | 6.6  | 0 |
| 1 | 53 | 26.1 | 90   | 1 | 2 | 2 | 0 | 0 | 0 | 112 | 77  | 46 | 7.5 | 7.6 | 7.55 | 102 | 12 | 1    | 197 | 121 | 67  | 124 | 5.8  | 0 |

|   |    |      |      |   |   |   |   |   |   |     |     |    |      |      |      |     |    |      |     |     |    |     |     |   |
|---|----|------|------|---|---|---|---|---|---|-----|-----|----|------|------|------|-----|----|------|-----|-----|----|-----|-----|---|
| 1 | 69 | 22.2 | 83   | 2 | 1 | 2 | 0 | 0 | 0 | 135 | 82  | 63 | 9.3  | 9.1  | 9.2  | 101 | 11 | 0.83 | 187 | 73  | 66 | 116 | 5.5 | 1 |
| 1 | 52 | 21.1 | 81   | 2 | 2 | 2 | 0 | 0 | 0 | 115 | 69  | 58 | 8    | 7.7  | 7.85 | 92  | 17 | 0.91 | 178 | 113 | 50 | 104 | 4.9 | 1 |
| 1 | 47 | 25.1 | 91   | 2 | 2 | 2 | 1 | 0 | 1 | 147 | 91  | 64 | 8.5  | 8    | 8.25 | 102 | 17 | 0.67 | 245 | 158 | 67 | 164 | 5.3 | 0 |
| 1 | 54 | 26.0 | 96.5 | 2 | 2 | 2 | 0 | 0 | 0 | 116 | 81  | 50 | 7.9  | 8.3  | 8.1  | 107 | 19 | 1.07 | 224 | 193 | 46 | 156 | 5.6 | 1 |
| 1 | 53 | 27.4 | 91.5 | 1 | 2 | 1 | 0 | 0 | 0 | 125 | 83  | 57 | 6.2  | 6.3  | 6.25 | 98  | 14 | 0.94 | 213 | 90  | 46 | 149 | 5.6 | 1 |
| 1 | 53 | 28.7 | 103  | 1 | 1 | 2 | 0 | 0 | 1 | 123 | 85  | 72 | 7.8  | 7.2  | 7.5  | 108 | 19 | 0.97 | 261 | 211 | 51 | 180 | 5.6 | 1 |
| 1 | 53 | 20.4 | 79   | 2 | 1 | 2 | 0 | 0 | 1 | 120 | 79  | 68 | 7.9  | 8.1  | 8    | 97  | 13 | 0.91 | 187 | 170 | 39 | 124 | 5.4 | 1 |
| 1 | 57 | 24.3 | 82.5 | 2 | 1 | 2 | 1 | 0 | 0 | 133 | 96  | 69 | 7.3  | 7.6  | 7.45 | 91  | 11 | 0.97 | 183 | 87  | 50 | 126 | 5   | 0 |
| 1 | 73 | 25.0 | 95   | 2 | 1 | 2 | 0 | 0 | 0 | 116 | 85  | 67 | 13.4 | 10.8 | 12.1 | 90  | 19 | 1.27 | 179 | 98  | 45 | 119 | 6.1 | 1 |
| 1 | 50 | 30.3 | 104  | 2 | 2 | 2 | 1 | 0 | 1 | 105 | 75  | 79 | 8.4  | 8.4  | 8.4  | 109 | 12 | 1.15 | 215 | 540 | 35 | 96  | 5.6 | 1 |
| 1 | 55 | 23.9 | 84.5 | 2 | 2 | 2 | 1 | 0 | 0 | 109 | 72  | 60 | 6.6  | 6.6  | 6.6  | 97  | 15 | 1.28 | 197 | 157 | 43 | 118 | 5.4 | 1 |
| 1 | 48 | 24.4 | 91   | 2 | 2 | 2 | 0 | 0 | 0 | 130 | 89  | 61 | 7.3  | 7.1  | 7.2  | 107 | 19 | 0.98 | 141 | 82  | 47 | 78  | 6.3 | 1 |
| 1 | 43 | 24.9 | 89   | 1 | 1 | 1 | 1 | 0 | 1 | 132 | 87  | 68 | 6    | 6.2  | 6.1  | 93  | 8  | 0.86 | 122 | 153 | 39 | 69  | 5.5 | 0 |
| 2 | 44 | 20.9 | 78   | 1 | 1 | 1 | 0 | 0 | 0 | 111 | 75  | 57 | 5.6  | 5.8  | 5.7  | 95  | 11 | 0.68 | 170 | 98  | 54 | 93  | 5.8 | 0 |
| 1 | 54 | 22.9 | 87.5 | 1 | 1 | 2 | 0 | 0 | 1 | 122 | 81  | 61 | 8.5  | 8.2  | 8.35 | 91  | 19 | 0.95 | 250 | 99  | 45 | 190 | 5.4 | 0 |
| 1 | 48 | 27.1 | 96   | 2 | 2 | 2 | 1 | 0 | 0 | 148 | 102 | 72 | 7.4  | 7.2  | 7.3  | 112 | 15 | 0.79 | 223 | 43  | 65 | 155 | 5.8 | 0 |
| 2 | 47 | 21.5 | 71   | 1 | 1 | 2 | 0 | 0 | 0 | 98  | 66  | 68 | 7.1  | 7.1  | 7.1  | 93  | 10 | 0.57 | 198 | 47  | 57 | 125 | 5.7 | 0 |
| 1 | 50 | 26.1 | 88.2 | 1 | 1 | 2 | 0 | 0 | 0 | 112 | 76  | 71 | 7.5  | 7.6  | 7.55 | 97  | 11 | 0.88 | 209 | 104 | 56 | 141 | 5.3 | 1 |
| 1 | 56 | 26.4 | 91   | 1 | 1 | 1 | 1 | 0 | 0 | 132 | 92  | 54 | 7.7  | 7.6  | 7.65 | 106 | 17 | 0.82 | 176 | 83  | 58 | 107 | 5   | 1 |
| 2 | 49 | 21.5 | 81   | 1 | 1 | 2 | 0 | 0 | 0 | 116 | 66  | 54 | 5.8  | 6    | 5.9  | 94  | 15 | 0.59 | 176 | 32  | 66 | 86  | 5.4 | 1 |
| 1 | 56 | 22.6 | 80.4 | 2 | 1 | 2 | 0 | 0 | 0 | 127 | 81  | 75 | 7.8  | 7.8  | 7.8  | 98  | 13 | 0.94 | 231 | 56  | 61 | 156 | 4.9 | 1 |
| 2 | 64 | 28.5 | 97.5 | 1 | 1 | 1 | 1 | 1 | 1 | 141 | 90  | 61 | 7.4  | 7.2  | 7.3  | 155 | 14 | 0.68 | 130 | 117 | 45 | 72  | 7.9 | 0 |
| 1 | 48 | 24.7 | 83.5 | 2 | 1 | 1 | 0 | 0 | 1 | 122 | 77  | 65 | 6.8  | 6.7  | 6.75 | 101 | 19 | 1.03 | 243 | 202 | 47 | 173 | 5.5 | 0 |
| 1 | 48 | 27.4 | 104  | 2 | 2 | 2 | 0 | 0 | 1 | 124 | 82  | 93 | 7.1  | 7.1  | 7.1  | 116 | 18 | 0.78 | 285 | 295 | 90 | 169 | 6   | 1 |
| 1 | 50 | 28.9 | 103  | 2 | 1 | 2 | 1 | 1 | 0 | 121 | 79  | 54 | 8    | 8    | 8    | 131 | 16 | 0.92 | 191 | 173 | 46 | 123 | 6.7 | 1 |
| 1 | 48 | 26.8 | 95   | 1 | 1 | 2 | 1 | 0 | 1 | 131 | 90  | 79 | 6.8  | 7    | 6.9  | 102 | 12 | 1.17 | 160 | 125 | 47 | 100 | 5.8 | 0 |
| 2 | 66 | 34.3 | 107  | 1 | 1 | 1 | 1 | 0 | 1 | 154 | 88  | 60 | 7.1  | 7.5  | 7.3  | 95  | 12 | 0.58 | 198 | 133 | 81 | 87  | 6   | 0 |
| 1 | 49 | 24.7 | 85   | 2 | 1 | 2 | 0 | 0 | 1 | 118 | 81  | 58 | 8.4  | 8.3  | 8.35 | 92  | 12 | 0.84 | 124 | 84  | 39 | 75  | 5.3 | 1 |
| 1 | 46 | 29.0 | 91   | 2 | 1 | 1 | 1 | 0 | 0 | 133 | 96  | 77 | 7.1  | 7.1  | 7.1  | 109 | 10 | 0.73 | 173 | 198 | 48 | 111 | 5.3 | 1 |



|   |    |      |      |   |   |   |   |   |   |     |    |    |     |     |      |     |    |      |     |     |    |     |     |   |
|---|----|------|------|---|---|---|---|---|---|-----|----|----|-----|-----|------|-----|----|------|-----|-----|----|-----|-----|---|
| 1 | 47 | 29.3 | 102  | 2 | 2 | 2 | 0 | 0 | 0 | 133 | 87 | 64 | 7.4 | 7.6 | 7.5  | 103 | 13 | 0.87 | 153 | 92  | 49 | 95  | 5.2 | 0 |
| 1 | 66 | 23.2 | 89   | 2 | 1 | 2 | 0 | 0 | 1 | 123 | 79 | 78 | 7.9 | 8   | 7.95 | 90  | 14 | 0.89 | 189 | 128 | 37 | 126 | 5.3 | 0 |
| 1 | 52 | 22.5 | 89   | 2 | 1 | 1 | 0 | 0 | 1 | 129 | 80 | 64 | 7.7 | 7.4 | 7.55 | 92  | 13 | 0.98 | 270 | 449 | 35 | 136 | 6   | 0 |
| 1 | 50 | 24.3 | 91   | 2 | 2 | 2 | 1 | 0 | 1 | 119 | 81 | 73 | 7.9 | 8   | 7.95 | 95  | 14 | 0.95 | 146 | 94  | 71 | 75  | 5.6 | 0 |
| 1 | 54 | 29.4 | 101  | 2 | 2 | 1 | 1 | 0 | 0 | 140 | 89 | 60 | 9.8 | 7.3 | 8.55 | 110 | 12 | 0.91 | 152 | 147 | 44 | 88  | 5.9 | 1 |
| 1 | 39 | 24.7 | 82   | 2 | 1 | 2 | 0 | 0 | 0 | 121 | 71 | 51 | 6.1 | 6.3 | 6.2  | 88  | 18 | 0.94 | 182 | 79  | 48 | 122 | 5.4 | 1 |
| 1 | 48 | 23.8 | 90.4 | 2 | 2 | 2 | 1 | 0 | 0 | 134 | 94 | 71 | 6.8 | 6.5 | 6.65 | 119 | 10 | 0.79 | 154 | 195 | 45 | 80  | 5.5 | 1 |
| 2 | 48 | 21.8 | 74   | 1 | 1 | 1 | 0 | 0 | 1 | 111 | 75 | 51 | 7.4 | 7.3 | 7.35 | 100 | 10 | 0.67 | 250 | 64  | 62 | 180 | 5.1 | 1 |
| 1 | 58 | 25.3 | 92.4 | 2 | 1 | 2 | 0 | 0 | 1 | 101 | 75 | 52 | 7.8 | 7.9 | 7.85 | 110 | 14 | 0.88 | 168 | 114 | 54 | 84  | 5.9 | 1 |
| 1 | 52 | 23.5 | 90   | 2 | 1 | 1 | 0 | 0 | 1 | 112 | 74 | 56 | 7.8 | 7.7 | 7.75 | 90  | 15 | 0.78 | 128 | 187 | 27 | 70  | 5.6 | 0 |
| 1 | 49 | 25.4 | 89   | 1 | 2 | 2 | 1 | 0 | 0 | 135 | 94 | 67 | 8.2 | 7.7 | 7.95 | 100 | 13 | 1    | 196 | 160 | 47 | 125 | 5.6 | 0 |
| 1 | 59 | 23.7 | 85   | 2 | 1 | 1 | 0 | 0 | 0 | 109 | 74 | 63 | 7.4 | 7.1 | 7.25 | 85  | 14 | 1.01 | 186 | 81  | 42 | 129 | 5.7 | 1 |
| 1 | 55 | 25.4 | 90   | 2 | 1 | 1 | 0 | 0 | 0 | 121 | 85 | 72 | 7.7 | 7.2 | 7.45 | 87  | 13 | 0.99 | 205 | 161 | 46 | 134 | 5.4 | 1 |
| 2 | 64 | 20.4 | 80.5 | 1 | 1 | 1 | 1 | 0 | 1 | 142 | 90 | 93 | 9   | 8   | 8.5  | 88  | 12 | 0.6  | 163 | 76  | 57 | 98  | 5.6 | 0 |
| 1 | 49 | 27.0 | 93.5 | 2 | 2 | 2 | 1 | 0 | 0 | 128 | 93 | 63 | 6.3 | 6.4 | 6.35 | 104 | 14 | 0.88 | 217 | 127 | 48 | 148 | 5.4 | 1 |
| 1 | 54 | 27.5 | 96.5 | 2 | 2 | 2 | 1 | 0 | 1 | 133 | 85 | 58 | 8.1 | 7.6 | 7.85 | 112 | 19 | 0.85 | 149 | 226 | 43 | 75  | 5.5 | 1 |
| 1 | 51 | 23.3 | 86   | 2 | 1 | 2 | 1 | 0 | 1 | 135 | 93 | 73 | 7.7 | 7.7 | 7.7  | 119 | 12 | 1.04 | 210 | 305 | 43 | 109 | 5.7 | 1 |
| 1 | 50 | 20.8 | 75.5 | 1 | 1 | 1 | 0 | 0 | 1 | 119 | 84 | 70 | 7.6 | 7.6 | 7.6  | 92  | 17 | 0.81 | 160 | 386 | 31 | 59  | 5.6 | 0 |
| 1 | 57 | 22.6 | 86   | 2 | 1 | 2 | 1 | 1 | 1 | 110 | 76 | 85 | 7.5 | 7.6 | 7.55 | 121 | 8  | 1.01 | 128 | 208 | 41 | 64  | 7.2 | 0 |
| 1 | 53 | 25.4 | 88   | 2 | 1 | 1 | 0 | 0 | 0 | 110 | 75 | 67 | 6.9 | 7   | 6.95 | 92  | 14 | 0.99 | 173 | 74  | 52 | 111 | 6   | 0 |
| 1 | 51 | 27.4 | 88.5 | 2 | 1 | 1 | 1 | 0 | 1 | 135 | 86 | 66 | 7.2 | 7.3 | 7.25 | 87  | 18 | 1    | 187 | 218 | 37 | 127 | 5.4 | 1 |
| 1 | 50 | 26.5 | 89   | 2 | 1 | 2 | 0 | 0 | 1 | 134 | 89 | 66 | 7.8 | 8   | 7.9  | 107 | 18 | 0.88 | 278 | 185 | 41 | 213 | 5.8 | 1 |
| 1 | 71 | 25.5 | 93.5 | 2 | 1 | 1 | 0 | 0 | 1 | 127 | 82 | 64 | 8.3 | 8.4 | 8.35 | 112 | 23 | 0.91 | 169 | 100 | 39 | 119 | 5.3 | 1 |
| 2 | 51 | 21.2 | 79   | 1 | 1 | 1 | 0 | 0 | 1 | 110 | 76 | 75 | 6.7 | 6.6 | 6.65 | 87  | 8  | 0.72 | 254 | 132 | 81 | 140 | 5.7 | 1 |
| 1 | 53 | 22.7 | 81.5 | 1 | 1 | 1 | 0 | 0 | 0 | 122 | 80 | 60 | 7   | 6.8 | 6.9  | 97  | 11 | 0.85 | 216 | 109 | 47 | 152 | 5.3 | 1 |
| 1 | 44 | 28.4 | 95.5 | 2 | 2 | 2 | 1 | 0 | 0 | 137 | 90 | 62 | 6.7 | 6.3 | 6.5  | 105 | 11 | 0.91 | 214 | 148 | 50 | 151 | 5.7 | 0 |
| 1 | 69 | 24.9 | 91.5 | 2 | 1 | 2 | 0 | 0 | 1 | 123 | 83 | 63 | 8.1 | 8.5 | 8.3  | 97  | 15 | 1.03 | 173 | 88  | 68 | 96  | 5.2 | 1 |
| 1 | 51 | 28.4 | 101  | 2 | 1 | 1 | 0 | 0 | 1 | 138 | 92 | 71 | 6.8 | 6.6 | 6.7  | 99  | 14 | 0.96 | 194 | 214 | 49 | 118 | 5.6 | 0 |
| 1 | 46 | 25.3 | 86.5 | 2 | 1 | 2 | 0 | 0 | 0 | 127 | 84 | 67 | 6   | 6   | 6    | 96  | 12 | 1.01 | 186 | 162 | 52 | 110 | 5.4 | 1 |

|   |    |      |      |   |   |   |   |   |   |     |     |    |      |      |      |     |    |      |     |     |    |     |     |   |
|---|----|------|------|---|---|---|---|---|---|-----|-----|----|------|------|------|-----|----|------|-----|-----|----|-----|-----|---|
| 1 | 38 | 24.0 | 94.5 | 2 | 2 | 2 | 0 | 0 | 0 | 134 | 78  | 60 | 7    | 6.8  | 6.9  | 91  | 12 | 1.09 | 203 | 149 | 53 | 127 | 5.2 | 0 |
| 1 | 41 | 28.1 | 98.7 | 2 | 1 | 2 | 1 | 0 | 0 | 141 | 85  | 62 | 5.9  | 5.8  | 5.85 | 107 | 17 | 0.72 | 185 | 126 | 46 | 128 | 5.4 | 1 |
| 1 | 56 | 25.4 | 86.4 | 2 | 1 | 2 | 1 | 0 | 0 | 130 | 95  | 73 | 7.6  | 7.6  | 7.6  | 104 | 13 | 0.89 | 181 | 128 | 53 | 116 | 5.1 | 1 |
| 1 | 42 | 26.4 | 96   | 2 | 1 | 2 | 1 | 0 | 1 | 124 | 85  | 75 | 7.2  | 7.3  | 7.25 | 97  | 14 | 0.89 | 142 | 148 | 38 | 94  | 5.5 | 1 |
| 1 | 40 | 23.5 | 84.5 | 2 | 1 | 1 | 0 | 0 | 0 | 123 | 81  | 52 | 6.8  | 6.5  | 6.65 | 95  | 15 | 0.88 | 177 | 95  | 49 | 113 | 5.3 | 1 |
| 1 | 35 | 22.9 | 85.5 | 2 | 1 | 2 | 0 | 0 | 0 | 119 | 72  | 65 | 5.9  | 6.1  | 6    | 84  | 12 | 1.05 | 177 | 83  | 66 | 100 | 5.1 | 1 |
| 1 | 49 | 24.5 | 84   | 2 | 1 | 2 | 1 | 0 | 0 | 142 | 94  | 63 | 6.4  | 6.4  | 6.4  | 99  | 20 | 0.98 | 194 | 88  | 61 | 115 | 5.3 | 0 |
| 2 | 66 | 19.9 | 73   | 1 | 1 | 2 | 1 | 0 | 1 | 140 | 84  | 73 | 8.4  | 8.7  | 8.55 | 103 | 11 | 0.61 | 257 | 87  | 76 | 163 | 5.8 | 1 |
| 1 | 49 | 22.7 | 85   | 2 | 1 | 2 | 0 | 0 | 0 | 114 | 75  | 60 | 6.7  | 6.7  | 6.7  | 89  | 13 | 0.83 | 220 | 138 | 47 | 155 | 5.4 | 0 |
| 1 | 54 | 24.0 | 92   | 1 | 1 | 2 | 1 | 0 | 1 | 120 | 85  | 62 | 7.3  | 7.3  | 7.3  | 94  | 15 | 0.99 | 179 | 126 | 38 | 127 | 5.3 | 1 |
| 1 | 52 | 28.6 | 96   | 2 | 1 | 2 | 1 | 0 | 1 | 145 | 97  | 63 | 8    | 8.3  | 8.15 | 101 | 19 | 1.23 | 261 | 392 | 41 | 148 | 5.5 | 1 |
| 1 | 54 | 25.6 | 90   | 1 | 1 | 2 | 1 | 0 | 1 | 131 | 94  | 57 | 6.5  | 6.3  | 6.4  | 102 | 19 | 0.99 | 188 | 143 | 56 | 112 | 5.4 | 0 |
| 1 | 53 | 22.8 | 86.9 | 2 | 1 | 2 | 0 | 1 | 0 | 131 | 88  | 58 | 7.8  | 7.9  | 7.85 | 142 | 13 | 0.75 | 213 | 166 | 41 | 149 | 6.4 | 1 |
| 1 | 46 | 22.3 | 80   | 2 | 1 | 2 | 0 | 0 | 1 | 115 | 74  | 59 | 7.4  | 7.8  | 7.6  | 94  | 10 | 0.76 | 179 | 79  | 81 | 86  | 5   | 1 |
| 1 | 65 | 21.0 | 78   | 2 | 1 | 1 | 1 | 0 | 0 | 152 | 93  | 64 | 10.5 | 9.9  | 10.2 | 95  | 15 | 1.22 | 151 | 79  | 59 | 85  | 5.1 | 0 |
| 1 | 70 | 26.7 | 103  | 2 | 2 | 2 | 1 | 0 | 0 | 148 | 86  | 58 | 10.3 | 10.5 | 10.4 | 112 | 9  | 1.02 | 200 | 95  | 97 | 97  | 5.6 | 1 |
| 2 | 59 | 26.3 | 83.5 | 1 | 1 | 2 | 1 | 0 | 1 | 138 | 88  | 71 | 7.2  | 7.4  | 7.3  | 92  | 17 | 0.78 | 317 | 95  | 80 | 218 | 5.6 | 1 |
| 1 | 52 | 23.7 | 86   | 2 | 2 | 2 | 0 | 0 | 1 | 114 | 69  | 53 | 7.6  | 7.7  | 7.65 | 92  | 14 | 1.04 | 199 | 213 | 37 | 130 | 5.6 | 0 |
| 1 | 54 | 26.0 | 93   | 2 | 2 | 2 | 1 | 1 | 0 | 140 | 95  | 62 | 9.3  | 9.2  | 9.25 | 143 | 11 | 0.77 | 203 | 111 | 61 | 134 | 5.7 | 1 |
| 1 | 59 | 30.5 | 96   | 1 | 1 | 1 | 1 | 0 | 1 | 112 | 79  | 58 | 6    | 5.8  | 5.9  | 105 | 22 | 1.32 | 138 | 58  | 44 | 89  | 5.7 | 0 |
| 1 | 45 | 26.1 | 88   | 2 | 2 | 2 | 1 | 0 | 0 | 128 | 94  | 61 | 7    | 7    | 7    | 109 | 18 | 0.9  | 172 | 151 | 49 | 110 | 5.5 | 1 |
| 1 | 54 | 29.6 | 92   | 2 | 2 | 2 | 0 | 0 | 1 | 130 | 85  | 62 | 7.1  | 6.7  | 6.9  | 103 | 16 | 1.05 | 247 | 129 | 70 | 148 | 5.9 | 1 |
| 1 | 57 | 30.3 | 103  | 2 | 1 | 2 | 1 | 1 | 1 | 143 | 103 | 66 | 7.7  | 7.9  | 7.8  | 134 | 11 | 0.78 | 174 | 202 | 43 | 118 | 6.3 | 0 |
| 1 | 50 | 25.4 | 89.5 | 2 | 2 | 1 | 0 | 0 | 0 | 120 | 84  | 62 | 7.6  | 7.2  | 7.4  | 96  | 17 | 1.08 | 188 | 190 | 41 | 124 | 5.4 | 0 |
| 2 | 66 | 20.0 | 77   | 1 | 1 | 1 | 1 | 0 | 1 | 137 | 97  | 89 | 7.7  | 7.8  | 7.75 | 101 | 16 | 0.63 | 213 | 51  | 82 | 125 | 6   | 1 |
| 1 | 66 | 20.8 | 77   | 1 | 1 | 2 | 0 | 0 | 1 | 101 | 75  | 53 | 9.1  | 9.1  | 9.1  | 96  | 13 | 1.03 | 158 | 83  | 53 | 95  | 5.5 | 1 |
| 1 | 54 | 26.1 | 91.5 | 2 | 1 | 2 | 0 | 0 | 1 | 109 | 74  | 67 | 6.6  | 7    | 6.8  | 108 | 17 | 0.89 | 272 | 152 | 70 | 177 | 5.7 | 1 |
| 1 | 44 | 29.4 | 111  | 2 | 2 | 1 | 0 | 0 | 0 | 127 | 85  | 72 | 7.9  | 7.5  | 7.7  | 91  | 14 | 0.9  | 191 | 156 | 43 | 126 | 5.4 | 0 |
| 1 | 47 | 22.3 | 82   | 1 | 1 | 2 | 0 | 0 | 0 | 121 | 77  | 65 | 8.1  | 7.8  | 7.95 | 85  | 12 | 0.95 | 196 | 107 | 60 | 124 | 5.3 | 1 |

|   |    |      |      |   |   |   |   |   |   |     |    |    |      |      |       |     |    |      |     |     |    |     |     |   |
|---|----|------|------|---|---|---|---|---|---|-----|----|----|------|------|-------|-----|----|------|-----|-----|----|-----|-----|---|
| 1 | 54 | 24.7 | 95   | 2 | 2 | 2 | 1 | 0 | 0 | 126 | 93 | 93 | 6.6  | 6.4  | 6.5   | 113 | 11 | 0.87 | 181 | 145 | 75 | 86  | 6.4 | 0 |
| 1 | 53 | 26.3 | 92.5 | 2 | 1 | 2 | 0 | 0 | 1 | 121 | 83 | 59 | 7.2  | 7    | 7.1   | 94  | 19 | 0.91 | 185 | 106 | 40 | 136 | 5.4 | 0 |
| 2 | 51 | 18.5 | 65.8 | 1 | 1 | 2 | 0 | 0 | 0 | 108 | 58 | 44 | 7    | 7    | 7     | 80  | 10 | 0.73 | 177 | 85  | 56 | 107 | 5.3 | 0 |
| 1 | 57 | 23.8 | 84.5 | 2 | 1 | 1 | 0 | 0 | 0 | 109 | 71 | 43 | 9    | 9.2  | 9.1   | 91  | 23 | 0.88 | 194 | 82  | 50 | 127 | 5.1 | 1 |
| 1 | 45 | 29.4 | 103  | 1 | 1 | 1 | 1 | 1 | 0 | 129 | 91 | 71 | 6.8  | 6.9  | 6.85  | 147 | 9  | 1.03 | 190 | 109 | 52 | 128 | 7.3 | 1 |
| 1 | 51 | 30.2 | 105  | 2 | 2 | 2 | 0 | 0 | 1 | 122 | 84 | 74 | 7    | 6.5  | 6.75  | 95  | 14 | 0.96 | 236 | 126 | 48 | 175 | 5.7 | 0 |
| 1 | 43 | 27.8 | 97   | 1 | 1 | 1 | 0 | 0 | 1 | 130 | 83 | 56 | 7.1  | 7.2  | 7.15  | 108 | 14 | 0.92 | 250 | 96  | 59 | 181 | 5.5 | 0 |
| 1 | 55 | 27.0 | 90   | 1 | 2 | 2 | 1 | 0 | 0 | 129 | 87 | 64 | 7.8  | 7.7  | 7.75  | 122 | 14 | 1.18 | 153 | 172 | 41 | 95  | 5.9 | 0 |
| 2 | 50 | 20.8 | 78   | 1 | 1 | 2 | 0 | 0 | 1 | 109 | 72 | 59 | 8.4  | 8.4  | 8.4   | 107 | 13 | 0.62 | 255 | 156 | 53 | 191 | 5.8 | 0 |
| 1 | 50 | 24.1 | 89.5 | 2 | 2 | 1 | 0 | 0 | 0 | 127 | 81 | 60 | 7.5  | 7.2  | 7.35  | 99  | 12 | 1.02 | 202 | 175 | 48 | 126 | 5.4 | 1 |
| 2 | 64 | 24.6 | 88   | 1 | 1 | 1 | 1 | 0 | 1 | 111 | 79 | 66 | 7.6  | 7.2  | 7.4   | 95  | 18 | 0.65 | 288 | 135 | 58 | 206 | 5.1 | 1 |
| 1 | 48 | 24.9 | 97.5 | 2 | 1 | 2 | 1 | 0 | 1 | 134 | 91 | 57 | 6.7  | 6.6  | 6.65  | 88  | 14 | 0.9  | 166 | 109 | 51 | 111 | 5   | 1 |
| 1 | 70 | 26.5 | 90   | 2 | 1 | 2 | 1 | 0 | 1 | 119 | 88 | 71 | 8.6  | 8.8  | 8.7   | 104 | 15 | 1.02 | 182 | 142 | 36 | 121 | 5.7 | 0 |
| 1 | 55 | 25.0 | 89   | 2 | 1 | 1 | 1 | 0 | 0 | 123 | 73 | 61 | 7.6  | 7.6  | 7.6   | 94  | 16 | 0.85 | 208 | 129 | 41 | 147 | 5.6 | 1 |
| 2 | 56 | 26.6 | 90   | 1 | 1 | 2 | 1 | 1 | 0 | 161 | 94 | 57 | 7    | 6.9  | 6.95  | 107 | 13 | 0.59 | 199 | 140 | 50 | 125 | 6.6 | 1 |
| 1 | 63 | 27.1 | 101  | 2 | 1 | 2 | 1 | 0 | 0 | 137 | 88 | 65 | 8.3  | 8.4  | 8.35  | 88  | 11 | 0.83 | 192 | 89  | 52 | 124 | 5.4 | 0 |
| 1 | 45 | 23.9 | 88.5 | 2 | 1 | 1 | 1 | 0 | 0 | 138 | 97 | 60 | 6.7  | 6.7  | 6.7   | 107 | 17 | 0.98 | 192 | 102 | 63 | 119 | 5.6 | 1 |
| 1 | 63 | 28.7 | 96   | 2 | 2 | 2 | 1 | 1 | 1 | 121 | 84 | 75 | 11   | 10.2 | 10.6  | 138 | 15 | 0.94 | 151 | 95  | 67 | 83  | 5.9 | 1 |
| 2 | 74 | 23.8 | 90   | 1 | 1 | 1 | 1 | 0 | 1 | 131 | 79 | 66 | 10.5 | 11.4 | 10.95 | 100 | 18 | 0.71 | 263 | 120 | 72 | 164 | 5.8 | 0 |
| 1 | 38 | 26.6 | 85   | 2 | 1 | 1 | 1 | 0 | 1 | 152 | 98 | 53 | 5.9  | 5.8  | 5.85  | 95  | 11 | 0.93 | 162 | 297 | 35 | 104 | 5.5 | 1 |
| 1 | 51 | 24.9 | 90   | 2 | 2 | 2 | 0 | 0 | 0 | 115 | 79 | 58 | 7.1  | 7.2  | 7.15  | 93  | 17 | 0.9  | 214 | 104 | 60 | 146 | 5.6 | 1 |
| 1 | 45 | 21.3 | 75.5 | 1 | 1 | 2 | 0 | 0 | 0 | 120 | 76 | 55 | 6.3  | 6.1  | 6.2   | 91  | 16 | 0.94 | 184 | 117 | 44 | 131 | 5.8 | 1 |
| 1 | 71 | 24.4 | 87   | 2 | 1 | 2 | 0 | 0 | 0 | 127 | 84 | 58 | 7.2  | 6.6  | 6.9   | 80  | 21 | 0.99 | 200 | 87  | 75 | 114 | 5.1 | 1 |
| 1 | 48 | 24.3 | 92   | 2 | 2 | 2 | 1 | 1 | 1 | 142 | 99 | 69 | 7.3  | 7.4  | 7.35  | 116 | 11 | 0.8  | 158 | 175 | 51 | 86  | 6.5 | 1 |
| 1 | 42 | 24.9 | 84   | 2 | 1 | 2 | 0 | 1 | 1 | 121 | 81 | 68 | 6.8  | 6.5  | 6.65  | 136 | 19 | 0.86 | 174 | 236 | 52 | 98  | 7   | 0 |
| 1 | 51 | 25.4 | 87   | 2 | 1 | 2 | 1 | 0 | 1 | 118 | 83 | 60 | 8.2  | 7.9  | 8.05  | 95  | 16 | 0.94 | 136 | 102 | 32 | 99  | 5.6 | 1 |
| 2 | 50 | 19.6 | 74   | 1 | 1 | 2 | 0 | 0 | 1 | 112 | 71 | 61 | 7.1  | 7.3  | 7.2   | 95  | 16 | 0.6  | 210 | 67  | 62 | 142 | 5.9 | 1 |
| 1 | 52 | 22.0 | 84   | 1 | 1 | 1 | 0 | 0 | 0 | 118 | 83 | 68 | 7    | 6.9  | 6.95  | 90  | 13 | 0.82 | 209 | 138 | 55 | 117 | 5.4 | 1 |
| 1 | 60 | 25.6 | 93   | 2 | 1 | 2 | 1 | 0 | 1 | 139 | 94 | 58 | 8.1  | 8    | 8.05  | 99  | 13 | 1.04 | 184 | 251 | 43 | 96  | 5.3 | 1 |

|   |    |      |      |   |   |   |   |   |   |     |     |    |      |      |       |     |    |      |     |     |    |     |     |   |
|---|----|------|------|---|---|---|---|---|---|-----|-----|----|------|------|-------|-----|----|------|-----|-----|----|-----|-----|---|
| 2 | 50 | 24.8 | 85   | 1 | 1 | 2 | 0 | 1 | 1 | 126 | 82  | 62 | 5.9  | 6    | 5.95  | 105 | 5  | 0.57 | 256 | 210 | 52 | 160 | 5.8 | 1 |
| 1 | 50 | 23.9 | 93   | 2 | 1 | 1 | 0 | 1 | 1 | 117 | 78  | 74 | 7.6  | 7.5  | 7.55  | 109 | 16 | 0.91 | 146 | 135 | 49 | 82  | 6.8 | 0 |
| 1 | 50 | 24.4 | 80.5 | 2 | 1 | 2 | 0 | 0 | 0 | 123 | 80  | 43 | 7.1  | 7.2  | 7.15  | 103 | 12 | 0.97 | 145 | 49  | 43 | 91  | 5.7 | 1 |
| 1 | 50 | 25.0 | 85   | 2 | 2 | 2 | 1 | 1 | 1 | 125 | 83  | 78 | 6.7  | 6.5  | 6.6   | 129 | 18 | 0.85 | 215 | 283 | 53 | 109 | 6.3 | 0 |
| 2 | 64 | 22.6 | 82   | 1 | 1 | 2 | 1 | 0 | 1 | 146 | 89  | 80 | 8.2  | 7.8  | 8     | 86  | 20 | 0.74 | 229 | 77  | 58 | 160 | 5.5 | 1 |
| 2 | 41 | 20.2 | 78   | 1 | 1 | 1 | 0 | 0 | 0 | 111 | 80  | 71 | 7.8  | 7.6  | 7.7   | 88  | 13 | 0.68 | 193 | 76  | 56 | 128 | 5.2 | 1 |
| 1 | 51 | 26.8 | 99   | 1 | 2 | 2 | 1 | 0 | 0 | 138 | 104 | 55 | 9.5  | 8.3  | 8.9   | 104 | 17 | 1.16 | 182 | 84  | 44 | 130 | 5.6 | 1 |
| 1 | 56 | 22.6 | 83.5 | 2 | 1 | 1 | 1 | 0 | 1 | 130 | 89  | 61 | 7.7  | 7.5  | 7.6   | 94  | 20 | 1.07 | 244 | 121 | 74 | 153 | 5.5 | 1 |
| 2 | 52 | 20.8 | 77   | 1 | 1 | 1 | 0 | 0 | 0 | 113 | 79  | 70 | 7    | 7    | 7     | 53  | 15 | 0.55 | 158 | 26  | 64 | 85  | 5   | 0 |
| 1 | 44 | 26.6 | 91   | 1 | 1 | 2 | 1 | 0 | 0 | 140 | 100 | 70 | 6.8  | 6.7  | 6.75  | 98  | 17 | 0.96 | 179 | 120 | 45 | 119 | 5.5 | 0 |
| 1 | 53 | 26.0 | 85   | 2 | 1 | 2 | 0 | 0 | 0 | 112 | 74  | 54 | 7.5  | 7.4  | 7.45  | 87  | 15 | 0.83 | 176 | 76  | 45 | 117 | 5.7 | 0 |
| 1 | 56 | 28.1 | 101  | 2 | 1 | 2 | 0 | 1 | 0 | 110 | 76  | 64 | 7.5  | 7.4  | 7.45  | 121 | 13 | 0.88 | 174 | 132 | 46 | 101 | 6.6 | 1 |
| 2 | 53 | 22.2 | 75.5 | 1 | 1 | 1 | 1 | 0 | 1 | 140 | 78  | 49 | 6.9  | 7    | 6.95  | 91  | 21 | 0.76 | 243 | 103 | 54 | 163 | 5.9 | 0 |
| 1 | 64 | 18.7 | 77   | 2 | 1 | 2 | 0 | 1 | 1 | 114 | 78  | 63 | 9.5  | 9.4  | 9.45  | 158 | 22 | 0.7  | 167 | 87  | 49 | 109 | 7.5 | 0 |
| 1 | 50 | 23.1 | 85   | 2 | 2 | 1 | 0 | 0 | 0 | 117 | 74  | 71 | 8.2  | 8.1  | 8.15  | 94  | 13 | 1.02 | 225 | 153 | 68 | 132 | 5.3 | 1 |
| 1 | 43 | 20.2 | 77   | 1 | 1 | 1 | 0 | 0 | 0 | 108 | 65  | 69 | 6.7  | 6.9  | 6.8   | 91  | 13 | 0.86 | 146 | 36  | 65 | 68  | 5.6 | 1 |
| 1 | 62 | 23.8 | 89   | 1 | 1 | 2 | 1 | 0 | 1 | 157 | 89  | 48 | 10.7 | 10.2 | 10.45 | 80  | 10 | 0.95 | 149 | 62  | 46 | 98  | 5.8 | 1 |
| 1 | 61 | 26.9 | 95   | 1 | 1 | 1 | 1 | 0 | 0 | 160 | 116 | 70 | 8.9  | 8.6  | 8.75  | 95  | 16 | 1.06 | 181 | 86  | 47 | 127 | 6.1 | 0 |
| 1 | 52 | 25.0 | 89.5 | 2 | 2 | 2 | 1 | 0 | 1 | 134 | 90  | 75 | 7    | 7.3  | 7.15  | 93  | 12 | 1.02 | 225 | 153 | 38 | 163 | 5   | 0 |
| 1 | 54 | 24.6 | 91   | 2 | 1 | 1 | 0 | 0 | 0 | 119 | 80  | 54 | 7.5  | 7.6  | 7.55  | 90  | 15 | 0.98 | 215 | 168 | 41 | 146 | 5.4 | 1 |
| 1 | 57 | 22.5 | 86   | 1 | 2 | 1 | 1 | 0 | 1 | 120 | 78  | 69 | 8.8  | 8.6  | 8.7   | 99  | 17 | 0.96 | 231 | 69  | 58 | 170 | 5.6 | 0 |
| 1 | 55 | 25.1 | 90   | 2 | 1 | 2 | 1 | 1 | 1 | 115 | 76  | 62 | 6.5  | 6.7  | 6.6   | 118 | 14 | 1.05 | 202 | 261 | 42 | 125 | 6.2 | 0 |
| 1 | 51 | 20.3 | 76   | 2 | 1 | 2 | 0 | 0 | 0 | 124 | 79  | 59 | 7.8  | 7.8  | 7.8   | 88  | 12 | 0.98 | 186 | 91  | 65 | 99  | 5.2 | 1 |
| 1 | 56 | 27.1 | 91   | 2 | 2 | 2 | 1 | 0 | 1 | 125 | 79  | 59 | 6.1  | 6.2  | 6.15  | 116 | 16 | 0.77 | 163 | 152 | 50 | 96  | 6.4 | 1 |
| 2 | 43 | 19.7 | 76   | 1 | 1 | 2 | 0 | 0 | 0 | 116 | 76  | 44 | 7.1  | 7.1  | 7.1   | 98  | 15 | 0.69 | 201 | 86  | 63 | 121 | 5.3 | 0 |
| 1 | 53 | 27.2 | 92   | 2 | 2 | 2 | 1 | 0 | 0 | 131 | 87  | 60 | 7.1  | 7    | 7.05  | 86  | 16 | 1.11 | 175 | 83  | 52 | 114 | 5.3 | 1 |
| 2 | 50 | 21.4 | 81   | 1 | 1 | 2 | 0 | 0 | 1 | 116 | 76  | 67 | 7.1  | 7.1  | 7.1   | 120 | 7  | 0.48 | 191 | 205 | 44 | 106 | 6.3 | 0 |
| 1 | 55 | 24.6 | 90   | 1 | 1 | 1 | 0 | 0 | 0 | 118 | 82  | 69 | 6.6  | 6.7  | 6.65  | 110 | 12 | 0.8  | 196 | 187 | 47 | 127 | 5.3 | 0 |
| 2 | 49 | 24.3 | 84   | 1 | 1 | 1 | 0 | 0 | 1 | 120 | 77  | 54 | 8.1  | 8.5  | 8.3   | 91  | 10 | 0.62 | 171 | 424 | 36 | 73  | 5.4 | 0 |

|   |    |      |      |   |   |   |   |   |   |     |     |    |     |     |      |     |    |      |     |     |    |     |     |   |
|---|----|------|------|---|---|---|---|---|---|-----|-----|----|-----|-----|------|-----|----|------|-----|-----|----|-----|-----|---|
| 2 | 58 | 23.7 | 90   | 1 | 1 | 1 | 1 | 0 | 1 | 124 | 88  | 60 | 8.9 | 8.8 | 8.85 | 99  | 17 | 0.58 | 227 | 104 | 41 | 168 | 5.5 | 1 |
| 2 | 50 | 23.2 | 82.5 | 1 | 1 | 1 | 1 | 0 | 0 | 116 | 95  | 86 | 6.3 | 6.3 | 6.3  | 108 | 12 | 0.65 | 226 | 131 | 56 | 142 | 5.5 | 1 |
| 1 | 49 | 24.7 | 86   | 2 | 2 | 2 | 0 | 0 | 1 | 111 | 83  | 69 | 7.3 | 6.8 | 7.05 | 89  | 15 | 0.93 | 237 | 136 | 33 | 167 | 5.4 | 1 |
| 2 | 49 | 18.7 | 79.3 | 1 | 1 | 2 | 0 | 0 | 0 | 113 | 68  | 68 | 7.2 | 7.3 | 7.25 | 94  | 13 | 0.55 | 236 | 90  | 68 | 146 | 5.4 | 0 |
| 1 | 48 | 23.8 | 82   | 1 | 1 | 1 | 0 | 0 | 0 | 116 | 80  | 58 | 7.6 | 7.4 | 7.5  | 83  | 14 | 1.09 | 188 | 178 | 43 | 118 | 5.4 | 0 |
| 1 | 49 | 24.4 | 91   | 2 | 2 | 2 | 1 | 1 | 0 | 141 | 102 | 79 | 8.7 | 8.2 | 8.45 | 155 | 19 | 0.72 | 165 | 139 | 57 | 99  | 7.3 | 1 |
| 2 | 55 | 23.6 | 82   | 1 | 1 | 1 | 0 | 1 | 0 | 103 | 65  | 65 | 6.5 | 6.4 | 6.45 | 112 | 12 | 0.72 | 204 | 165 | 55 | 128 | 6.5 | 1 |
| 1 | 43 | 23.3 | 85   | 1 | 2 | 2 | 0 | 0 | 0 | 130 | 84  | 63 | 7   | 6.8 | 6.9  | 96  | 14 | 1.2  | 196 | 77  | 66 | 109 | 5.5 | 1 |
| 1 | 55 | 26.3 | 94.5 | 1 | 2 | 2 | 1 | 0 | 1 | 128 | 89  | 60 | 6.8 | 6.7 | 6.75 | 108 | 12 | 0.83 | 201 | 220 | 45 | 133 | 5.5 | 0 |
| 1 | 47 | 24.5 | 87   | 1 | 1 | 2 | 0 | 0 | 1 | 107 | 75  | 53 | 6.2 | 6.2 | 6.2  | 98  | 16 | 0.91 | 213 | 83  | 66 | 135 | 5.4 | 1 |
| 2 | 48 | 26.3 | 106  | 1 | 1 | 2 | 1 | 0 | 0 | 156 | 90  | 73 | 6.5 | 6.1 | 6.3  | 112 | 20 | 0.64 | 179 | 109 | 62 | 95  | 6   | 0 |
| 1 | 51 | 23.9 | 84.9 | 2 | 1 | 2 | 1 | 0 | 1 | 115 | 77  | 73 | 6.9 | 7.1 | 7    | 95  | 17 | 1.15 | 234 | 124 | 54 | 155 | 5.5 | 1 |
| 1 | 50 | 23.1 | 89.3 | 2 | 1 | 1 | 1 | 0 | 0 | 128 | 82  | 52 | 7.7 | 7.3 | 7.5  | 105 | 18 | 1.1  | 191 | 124 | 44 | 112 | 5.8 | 0 |
| 1 | 54 | 24.7 | 87   | 2 | 2 | 2 | 0 | 0 | 1 | 123 | 85  | 67 | 8.2 | 8.1 | 8.15 | 115 | 22 | 0.82 | 152 | 79  | 38 | 107 | 4.9 | 0 |
| 1 | 45 | 24.2 | 84.5 | 2 | 1 | 2 | 0 | 0 | 1 | 123 | 85  | 65 | 7.3 | 7.2 | 7.25 | 87  | 14 | 1.03 | 229 | 493 | 38 | 82  | 5.2 | 0 |
| 1 | 41 | 25.0 | 81   | 1 | 1 | 2 | 0 | 0 | 0 | 119 | 79  | 63 | 7   | 7.2 | 7.1  | 96  | 15 | 1.17 | 207 | 134 | 54 | 120 | 5.8 | 0 |
| 1 | 53 | 22.9 | 84.5 | 1 | 2 | 2 | 0 | 0 | 0 | 122 | 78  | 73 | 7.6 | 7.8 | 7.7  | 102 | 13 | 0.85 | 217 | 67  | 73 | 128 | 5.3 | 1 |
| 1 | 58 | 22.7 | 88   | 2 | 2 | 2 | 0 | 0 | 0 | 116 | 76  | 79 | 6.8 | 7.2 | 7    | 74  | 11 | 0.84 | 169 | 137 | 59 | 85  | 5.9 | 1 |
| 1 | 53 | 24.0 | 90   | 2 | 1 | 2 | 1 | 0 | 1 | 106 | 74  | 64 | 7.5 | 7.5 | 7.5  | 109 | 13 | 1.06 | 164 | 100 | 62 | 90  | 5.7 | 0 |
| 1 | 47 | 20.8 | 82   | 2 | 2 | 2 | 0 | 0 | 0 | 108 | 77  | 64 | 8.6 | 8.2 | 8.4  | 85  | 11 | 0.71 | 172 | 44  | 75 | 86  | 5.1 | 1 |
| 1 | 35 | 33.8 | 113  | 2 | 1 | 1 | 1 | 1 | 1 | 165 | 104 | 66 | 7.3 | 7.3 | 7.3  | 147 | 17 | 1.23 | 195 | 328 | 44 | 105 | 9   | 0 |
| 2 | 44 | 22.4 | 79   | 1 | 1 | 1 | 0 | 0 | 0 | 120 | 84  | 64 | 7.6 | 7.7 | 7.65 | 93  | 9  | 0.61 | 182 | 128 | 40 | 118 | 5.1 | 0 |
| 1 | 42 | 24.8 | 88.2 | 2 | 2 | 2 | 1 | 0 | 0 | 122 | 77  | 63 | 6.5 | 6.6 | 6.55 | 101 | 9  | 0.86 | 222 | 145 | 50 | 153 | 5.3 | 0 |
| 1 | 58 | 27.0 | 98.5 | 2 | 2 | 1 | 1 | 1 | 1 | 137 | 91  | 74 | 8.3 | 8.3 | 8.3  | 120 | 16 | 0.74 | 149 | 87  | 52 | 78  | 6   | 0 |
| 1 | 49 | 31.4 | 101  | 2 | 1 | 2 | 1 | 0 | 0 | 137 | 80  | 64 | 7.2 | 7.2 | 7.2  | 98  | 14 | 1.13 | 177 | 177 | 47 | 100 | 5.4 | 1 |
| 1 | 39 | 25.1 | 92.2 | 2 | 1 | 2 | 0 | 0 | 1 | 114 | 82  | 66 | 8.3 | 8.1 | 8.2  | 89  | 18 | 0.84 | 169 | 209 | 32 | 119 | 4.8 | 1 |
| 1 | 60 | 22.9 | 86.9 | 1 | 1 | 2 | 0 | 0 | 0 | 129 | 77  | 59 | 8.3 | 8.2 | 8.25 | 93  | 14 | 0.86 | 165 | 83  | 85 | 124 | 5.1 | 0 |
| 1 | 56 | 23.2 | 84   | 1 | 2 | 2 | 1 | 0 | 0 | 138 | 88  | 63 | 6.2 | 5.8 | 6    | 76  | 15 | 1.2  | 127 | 90  | 43 | 74  | 5.1 | 0 |
| 2 | 52 | 20.5 | 69   | 1 | 1 | 1 | 1 | 0 | 1 | 112 | 79  | 55 | 7.5 | 7.8 | 7.65 | 89  | 19 | 0.64 | 197 | 65  | 86 | 105 | 5.6 | 0 |

|   |    |      |       |   |   |   |   |   |   |     |     |    |      |     |      |     |    |      |     |     |    |     |     |   |
|---|----|------|-------|---|---|---|---|---|---|-----|-----|----|------|-----|------|-----|----|------|-----|-----|----|-----|-----|---|
| 1 | 48 | 24.8 | 88    | 2 | 2 | 2 | 0 | 0 | 1 | 116 | 85  | 72 | 6.8  | 7.2 | 7    | 110 | 19 | 0.95 | 166 | 113 | 37 | 114 | 5   | 1 |
| 1 | 56 | 22.7 | 85.8  | 2 | 1 | 1 | 0 | 0 | 1 | 122 | 86  | 60 | 6.9  | 6.9 | 6.9  | 93  | 11 | 0.71 | 182 | 85  | 61 | 116 | 5.2 | 1 |
| 2 | 52 | 24.1 | 82    | 1 | 1 | 2 | 0 | 0 | 1 | 123 | 78  | 68 | 6.9  | 7   | 6.95 | 112 | 11 | 0.6  | 203 | 264 | 39 | 124 | 5.9 | 0 |
| 1 | 50 | 24.2 | 81.5  | 2 | 1 | 1 | 1 | 0 | 1 | 127 | 91  | 73 | 9.3  | 8.3 | 8.8  | 91  | 20 | 1.18 | 224 | 77  | 51 | 174 | 5.4 | 1 |
| 1 | 47 | 26.5 | 91    | 2 | 1 | 2 | 0 | 1 | 0 | 129 | 81  | 70 | 7.2  | 7.2 | 7.2  | 129 | 11 | 0.78 | 156 | 146 | 42 | 98  | 6.5 | 1 |
| 1 | 46 | 25.4 | 85    | 2 | 1 | 2 | 0 | 0 | 0 | 133 | 87  | 65 | 6.9  | 6.7 | 6.8  | 91  | 11 | 0.81 | 169 | 104 | 53 | 101 | 5.4 | 1 |
| 1 | 52 | 24.8 | 86.6  | 1 | 1 | 1 | 1 | 0 | 0 | 140 | 89  | 67 | 6.7  | 6.5 | 6.6  | 96  | 18 | 0.72 | 172 | 114 | 44 | 120 | 4.8 | 0 |
| 1 | 48 | 27.4 | 91.5  | 1 | 1 | 2 | 0 | 0 | 1 | 115 | 78  | 55 | 6.6  | 6.7 | 6.65 | 113 | 19 | 1.16 | 237 | 112 | 57 | 168 | 5.6 | 1 |
| 1 | 44 | 29.2 | 101.6 | 2 | 2 | 1 | 0 | 0 | 1 | 121 | 75  | 50 | 7.8  | 7.5 | 7.65 | 118 | 18 | 0.88 | 223 | 230 | 43 | 146 | 6.1 | 1 |
| 1 | 50 | 25.6 | 89    | 1 | 1 | 1 | 1 | 0 | 0 | 134 | 97  | 64 | 10.8 | 7.3 | 9.05 | 116 | 12 | 1.01 | 189 | 164 | 45 | 134 | 6   | 1 |
| 1 | 69 | 20.6 | 79.5  | 1 | 1 | 1 | 1 | 1 | 1 | 111 | 70  | 94 | 9.7  | 9.7 | 9.7  | 92  | 13 | 0.64 | 150 | 71  | 56 | 85  | 5.5 | 1 |
| 1 | 61 | 22.8 | 84    | 1 | 1 | 1 | 1 | 0 | 1 | 122 | 75  | 79 | 7.4  | 7.3 | 7.35 | 96  | 16 | 1.06 | 197 | 188 | 41 | 124 | 5.3 | 1 |
| 1 | 43 | 22.7 | 88.8  | 2 | 1 | 1 | 1 | 0 | 1 | 140 | 100 | 70 | 8.4  | 8.2 | 8.3  | 123 | 14 | 0.93 | 194 | 101 | 33 | 148 | 5.8 | 1 |
| 1 | 61 | 25.1 | 85.5  | 2 | 1 | 1 | 0 | 0 | 0 | 134 | 88  | 69 | 9    | 9.1 | 9.05 | 79  | 13 | 1.06 | 191 | 73  | 53 | 134 | 4.9 | 1 |
| 1 | 48 | 25.2 | 87.8  | 2 | 1 | 1 | 0 | 0 | 0 | 118 | 80  | 62 | 7.3  | 7.1 | 7.2  | 88  | 14 | 1.02 | 229 | 150 | 53 | 156 | 5.5 | 1 |
| 2 | 61 | 26.8 | 85.5  | 1 | 1 | 1 | 0 | 0 | 1 | 119 | 79  | 78 | 8.5  | 8.1 | 8.3  | 106 | 15 | 0.57 | 238 | 114 | 49 | 170 | 5.5 | 0 |
| 1 | 59 | 25.7 | 89    | 2 | 1 | 2 | 1 | 0 | 1 | 130 | 89  | 74 | 7.7  | 8   | 7.85 | 103 | 14 | 1.16 | 232 | 115 | 46 | 172 | 5.3 | 1 |
| 1 | 58 | 29.4 | 95.3  | 1 | 1 | 2 | 1 | 0 | 1 | 124 | 83  | 50 | 7.1  | 7.1 | 7.1  | 102 | 14 | 1.15 | 227 | 137 | 46 | 166 | 5.4 | 0 |
| 2 | 53 | 17.2 | 68    | 1 | 1 | 2 | 1 | 0 | 0 | 151 | 92  | 68 | 8.1  | 8.1 | 8.1  | 88  | 14 | 0.84 | 178 | 96  | 53 | 113 | 5.5 | 0 |
| 2 | 58 | 21.0 | 76    | 1 | 1 | 1 | 1 | 0 | 0 | 123 | 81  | 76 | 7    | 7.1 | 7.05 | 102 | 15 | 0.53 | 181 | 46  | 52 | 122 | 6.1 | 0 |
| 1 | 50 | 24.0 | 82    | 1 | 1 | 1 | 0 | 0 | 0 | 123 | 79  | 68 | 6.3  | 6.5 | 6.4  | 94  | 13 | 0.93 | 174 | 63  | 56 | 97  | 5.4 | 0 |
| 1 | 49 | 21.5 | 81    | 2 | 1 | 2 | 0 | 1 | 0 | 113 | 76  | 66 | 7.9  | 7.9 | 7.9  | 164 | 24 | 0.82 | 136 | 76  | 52 | 73  | 9.4 | 1 |
| 1 | 48 | 24.7 | 95    | 2 | 1 | 1 | 0 | 0 | 1 | 128 | 88  | 60 | 7    | 6.8 | 6.9  | 96  | 15 | 0.89 | 200 | 235 | 40 | 132 | 5.5 | 1 |
| 1 | 50 | 24.4 | 89    | 1 | 1 | 1 | 1 | 0 | 1 | 130 | 96  | 76 | 7.4  | 7.3 | 7.35 | 98  | 11 | 0.99 | 217 | 156 | 49 | 146 | 5.5 | 0 |
| 1 | 44 | 20.4 | 73    | 2 | 1 | 2 | 0 | 0 | 1 | 112 | 80  | 75 | 8.1  | 8.3 | 8.2  | 97  | 11 | 0.84 | 170 | 95  | 37 | 117 | 5.7 | 1 |
| 2 | 50 | 20.8 | 75.5  | 1 | 1 | 2 | 0 | 0 | 0 | 115 | 67  | 64 | 7.4  | 7.6 | 7.5  | 95  | 10 | 0.77 | 215 | 95  | 64 | 126 | 5.5 | 1 |
| 2 | 42 | 19.7 | 77.5  | 1 | 2 | 1 | 0 | 0 | 0 | 117 | 78  | 56 | 7.8  | 7.5 | 7.65 | 85  | 14 | 0.65 | 206 | 73  | 65 | 137 | 5.2 | 0 |
| 1 | 48 | 24.1 | 83    | 2 | 2 | 2 | 0 | 0 | 1 | 117 | 74  | 67 | 6.4  | 6.4 | 6.4  | 95  | 10 | 1.01 | 174 | 55  | 53 | 125 | 5.3 | 1 |
| 1 | 54 | 24.8 | 84    | 2 | 1 | 2 | 0 | 0 | 0 | 123 | 87  | 68 | 7.4  | 7.5 | 7.45 | 110 | 17 | 1.09 | 224 | 108 | 42 | 156 | 5.8 | 1 |

|   |    |      |      |   |   |   |   |   |   |     |     |    |     |      |      |     |    |      |     |     |    |     |     |   |
|---|----|------|------|---|---|---|---|---|---|-----|-----|----|-----|------|------|-----|----|------|-----|-----|----|-----|-----|---|
| 1 | 47 | 21.5 | 83   | 2 | 2 | 2 | 0 | 0 | 0 | 123 | 75  | 58 | 6.6 | 6.5  | 6.55 | 97  | 13 | 0.84 | 168 | 102 | 51 | 95  | 5.2 | 0 |
| 1 | 46 | 23.0 | 78   | 2 | 2 | 2 | 0 | 0 | 0 | 119 | 75  | 64 | 7.2 | 7.3  | 7.25 | 95  | 15 | 0.92 | 183 | 101 | 48 | 128 | 5.5 | 1 |
| 1 | 53 | 24.3 | 90.5 | 1 | 1 | 2 | 1 | 0 | 1 | 132 | 90  | 68 | 7.2 | 7.5  | 7.35 | 94  | 12 | 0.84 | 140 | 52  | 48 | 83  | 5.6 | 0 |
| 1 | 58 | 23.3 | 81   | 2 | 1 | 2 | 0 | 0 | 0 | 128 | 82  | 60 | 7.3 | 7.8  | 7.55 | 95  | 10 | 0.86 | 185 | 78  | 69 | 111 | 5.6 | 0 |
| 1 | 48 | 25.7 | 92   | 2 | 1 | 2 | 0 | 0 | 1 | 131 | 89  | 83 | 6.4 | 6.3  | 6.35 | 109 | 15 | 0.78 | 199 | 237 | 35 | 145 | 6.4 | 0 |
| 1 | 54 | 26.6 | 92.5 | 2 | 2 | 2 | 0 | 0 | 0 | 124 | 82  | 66 | 6.9 | 6.9  | 6.9  | 93  | 20 | 1.06 | 154 | 96  | 43 | 94  | 5.4 | 1 |
| 1 | 57 | 26.2 | 97   | 2 | 1 | 1 | 1 | 0 | 1 | 132 | 97  | 82 | 8.7 | 10.1 | 9.4  | 106 | 13 | 0.95 | 243 | 174 | 71 | 144 | 5.7 | 1 |
| 1 | 48 | 26.1 | 96.5 | 2 | 2 | 2 | 0 | 0 | 1 | 137 | 87  | 50 | 8.9 | 8.8  | 8.85 | 84  | 14 | 0.86 | 223 | 189 | 60 | 134 | 5.6 | 0 |
| 1 | 46 | 23.1 | 83   | 1 | 1 | 2 | 1 | 1 | 1 | 145 | 108 | 71 | 8.4 | 10.6 | 9.5  | 227 | 11 | 0.77 | 299 | 317 | 50 | 195 | 9.3 | 1 |
| 2 | 53 | 21.0 | 71   | 1 | 1 | 2 | 0 | 0 | 0 | 113 | 77  | 61 | 7.7 | 7.6  | 7.65 | 91  | 13 | 0.65 | 196 | 150 | 59 | 110 | 5.6 | 1 |
| 1 | 57 | 24.0 | 88.3 | 2 | 2 | 2 | 1 | 0 | 0 | 114 | 74  | 83 | 7.6 | 7.5  | 7.55 | 110 | 12 | 0.95 | 206 | 152 | 62 | 130 | 5.4 | 1 |
| 1 | 46 | 28.4 | 95   | 2 | 1 | 1 | 1 | 0 | 1 | 151 | 96  | 70 | 6.6 | 6.4  | 6.5  | 122 | 11 | 1.05 | 177 | 137 | 57 | 100 | 5.8 | 0 |
| 1 | 43 | 22.3 | 84.5 | 2 | 1 | 2 | 0 | 0 | 0 | 125 | 89  | 49 | 7.2 | 7.2  | 7.2  | 101 | 13 | 0.72 | 170 | 122 | 50 | 110 | 5.5 | 1 |
| 1 | 57 | 29.8 | 100  | 2 | 1 | 2 | 1 | 0 | 1 | 117 | 72  | 58 | 8.1 | 8.2  | 8.15 | 107 | 24 | 1.05 | 178 | 106 | 49 | 120 | 6.1 | 0 |
| 2 | 42 | 26.3 | 91   | 1 | 1 | 1 | 1 | 1 | 1 | 141 | 107 | 64 | 7.9 | 7.4  | 7.65 | 195 | 14 | 0.59 | 155 | 332 | 35 | 77  | 9.1 | 0 |
| 1 | 42 | 25.8 | 88   | 2 | 1 | 2 | 0 | 0 | 1 | 123 | 80  | 62 | 7.1 | 6.8  | 6.95 | 107 | 19 | 0.84 | 211 | 298 | 43 | 118 | 5.6 | 1 |
| 1 | 54 | 28.7 | 92   | 1 | 1 | 2 | 1 | 1 | 1 | 142 | 82  | 71 | 7.2 | 7.3  | 7.25 | 105 | 14 | 0.8  | 153 | 84  | 44 | 101 | 5.9 | 0 |
| 1 | 60 | 26.1 | 93   | 2 | 1 | 2 | 1 | 0 | 1 | 124 | 88  | 56 | 8.7 | 8.7  | 8.7  | 104 | 16 | 0.94 | 188 | 186 | 44 | 119 | 5.8 | 1 |
| 1 | 53 | 25.4 | 94   | 1 | 1 | 1 | 1 | 0 | 0 | 126 | 83  | 61 | 6.8 | 6.8  | 6.8  | 88  | 10 | 0.87 | 218 | 88  | 55 | 139 | 5.4 | 0 |
| 1 | 46 | 25.8 | 87   | 2 | 1 | 2 | 0 | 0 | 1 | 104 | 62  | 56 | 7.1 | 7.1  | 7.1  | 110 | 12 | 0.73 | 213 | 134 | 47 | 136 | 5.8 | 0 |
| 1 | 63 | 23.0 | 83   | 2 | 1 | 2 | 0 | 0 | 1 | 111 | 80  | 70 | 9   | 9.1  | 9.05 | 89  | 18 | 1.25 | 197 | 84  | 55 | 119 | 6   | 1 |
| 1 | 60 | 25.4 | 87   | 2 | 2 | 2 | 1 | 0 | 1 | 152 | 101 | 67 | 9.5 | 9.4  | 9.45 | 84  | 13 | 0.81 | 175 | 337 | 30 | 91  | 5.6 | 1 |
| 1 | 60 | 25.0 | 92   | 1 | 1 | 2 | 0 | 0 | 1 | 123 | 87  | 55 | 8   | 7.9  | 7.95 | 88  | 10 | 0.86 | 189 | 425 | 34 | 92  | 5.2 | 1 |
| 1 | 53 | 23.4 | 89   | 2 | 1 | 1 | 0 | 0 | 1 | 114 | 78  | 78 | 7.5 | 7.7  | 7.6  | 92  | 17 | 0.83 | 167 | 105 | 39 | 164 | 6.1 | 1 |
| 1 | 54 | 24.9 | 86   | 2 | 1 | 2 | 1 | 0 | 1 | 139 | 98  | 79 | 8.3 | 8.2  | 8.25 | 105 | 11 | 0.94 | 183 | 263 | 33 | 110 | 5.7 | 1 |
| 1 | 49 | 27.5 | 95   | 1 | 1 | 2 | 1 | 0 | 1 | 143 | 94  | 65 | 7.8 | 7.6  | 7.7  | 104 | 12 | 1.01 | 219 | 161 | 48 | 150 | 5.3 | 1 |
| 1 | 59 | 20.9 | 83   | 2 | 1 | 2 | 1 | 1 | 0 | 128 | 90  | 91 | 8.6 | 8.6  | 8.6  | 153 | 15 | 0.86 | 206 | 179 | 44 | 139 | 7.1 | 1 |
| 2 | 56 | 22.4 | 77   | 1 | 1 | 1 | 1 | 0 | 0 | 119 | 78  | 53 | 9   | 8.9  | 8.95 | 101 | 16 | 0.83 | 152 | 67  | 64 | 88  | 6   | 1 |
| 1 | 59 | 25.6 | 91   | 1 | 1 | 2 | 1 | 0 | 1 | 140 | 101 | 69 | 8.6 | 7.9  | 8.25 | 99  | 12 | 1    | 212 | 204 | 41 | 126 | 5.4 | 1 |

|   |    |      |      |   |   |   |   |   |   |     |     |    |      |      |       |     |    |      |     |     |    |     |     |   |
|---|----|------|------|---|---|---|---|---|---|-----|-----|----|------|------|-------|-----|----|------|-----|-----|----|-----|-----|---|
| 1 | 57 | 21.9 | 81   | 1 | 1 | 2 | 1 | 0 | 0 | 167 | 100 | 46 | 8.2  | 7.6  | 7.9   | 102 | 13 | 0.89 | 170 | 47  | 68 | 92  | 5.5 | 0 |
| 1 | 49 | 24.5 | 86.3 | 1 | 1 | 2 | 0 | 0 | 1 | 117 | 74  | 56 | 7.1  | 7.1  | 7.1   | 105 | 12 | 0.97 | 208 | 112 | 37 | 147 | 5.7 | 1 |
| 1 | 51 | 22.5 | 84.5 | 1 | 1 | 2 | 0 | 0 | 0 | 134 | 83  | 64 | 7    | 7    | 7     | 92  | 11 | 1.01 | 182 | 106 | 52 | 119 | 5.5 | 1 |
| 1 | 69 | 23.8 | 85   | 2 | 1 | 2 | 0 | 0 | 1 | 132 | 87  | 69 | 10.9 | 10.7 | 10.8  | 107 | 17 | 0.92 | 158 | 108 | 54 | 90  | 5.7 | 1 |
| 1 | 53 | 20.5 | 76   | 1 | 1 | 2 | 0 | 0 | 0 | 128 | 84  | 56 | 7.3  | 7.4  | 7.35  | 92  | 15 | 0.86 | 159 | 51  | 62 | 84  | 5.4 | 0 |
| 1 | 53 | 22.1 | 80   | 1 | 1 | 2 | 0 | 0 | 0 | 116 | 75  | 59 | 7.3  | 7.4  | 7.35  | 101 | 17 | 0.8  | 207 | 74  | 53 | 140 | 5.5 | 1 |
| 1 | 54 | 22.6 | 77.5 | 1 | 1 | 2 | 0 | 0 | 0 | 124 | 89  | 74 | 6.4  | 7    | 6.7   | 87  | 22 | 0.83 | 174 | 40  | 63 | 94  | 5.4 | 1 |
| 1 | 51 | 26.5 | 98.5 | 2 | 1 | 1 | 1 | 0 | 1 | 138 | 97  | 65 | 6.7  | 6.9  | 6.8   | 111 | 14 | 0.99 | 242 | 193 | 59 | 151 | 5.7 | 0 |
| 1 | 52 | 25.6 | 95   | 2 | 2 | 1 | 1 | 0 | 0 | 131 | 97  | 48 | 7.6  | 7.4  | 7.5   | 121 | 15 | 0.78 | 227 | 102 | 60 | 150 | 5.9 | 1 |
| 1 | 57 | 31.3 | 107  | 1 | 1 | 2 | 0 | 1 | 1 | 135 | 86  | 75 | 8.4  | 8.3  | 8.35  | 129 | 14 | 1.04 | 187 | 292 | 32 | 110 | 4.3 | 1 |
| 1 | 52 | 22.7 | 85   | 2 | 1 | 2 | 0 | 0 | 0 | 120 | 78  | 59 | 7.4  | 7.2  | 7.3   | 93  | 15 | 0.97 | 204 | 44  | 69 | 135 | 5.4 | 0 |
| 2 | 58 | 29.4 | 100  | 1 | 1 | 1 | 1 | 0 | 1 | 141 | 83  | 68 | 8.3  | 8.3  | 8.3   | 104 | 20 | 0.61 | 224 | 378 | 41 | 105 | 5.7 | 0 |
| 1 | 47 | 30.0 | 100  | 2 | 2 | 1 | 1 | 0 | 1 | 143 | 100 | 62 | 7.1  | 7.1  | 7.1   | 117 | 12 | 0.91 | 328 | 308 | 32 | 217 | 6.3 | 0 |
| 1 | 51 | 26.5 | 92   | 2 | 2 | 1 | 0 | 0 | 0 | 138 | 84  | 64 | 10.9 | 11.6 | 11.25 | 108 | 11 | 0.95 | 198 | 159 | 55 | 124 | 5.8 | 0 |
| 2 | 55 | 22.5 | 76   | 1 | 1 | 2 | 0 | 0 | 1 | 129 | 89  | 65 | 6.8  | 6.2  | 6.5   | 93  | 12 | 0.57 | 197 | 84  | 68 | 110 | 5.5 | 0 |
| 1 | 43 | 25.6 | 87   | 1 | 1 | 1 | 1 | 0 | 0 | 140 | 89  | 51 | 6.5  | 6.3  | 6.4   | 93  | 13 | 1.05 | 225 | 84  | 54 | 150 | 5.3 | 1 |
| 1 | 40 | 22.9 | 86.5 | 1 | 1 | 1 | 0 | 0 | 0 | 130 | 89  | 88 | 6.7  | 6.8  | 6.75  | 89  | 16 | 0.88 | 180 | 58  | 49 | 124 | 4.9 | 0 |
| 1 | 49 | 22.1 | 80   | 2 | 1 | 2 | 0 | 0 | 1 | 124 | 87  | 58 | 7.4  | 7.6  | 7.5   | 105 | 23 | 1.02 | 253 | 68  | 52 | 179 | 5.4 | 0 |
| 1 | 45 | 23.6 | 90.5 | 2 | 2 | 2 | 0 | 0 | 1 | 114 | 72  | 59 | 7.4  | 7.4  | 7.4   | 103 | 12 | 0.83 | 171 | 84  | 37 | 126 | 5.4 | 0 |
| 2 | 76 | 22.3 | 87   | 2 | 2 | 2 | 1 | 0 | 0 | 146 | 75  | 61 | 8.5  | 8.3  | 8.4   | 101 | 24 | 0.69 | 212 | 59  | 78 | 130 | 5.8 | 0 |
| 1 | 44 | 24.8 | 89   | 1 | 1 | 2 | 1 | 0 | 0 | 129 | 94  | 69 | 6.9  | 6.9  | 6.9   | 91  | 14 | 1.12 | 231 | 130 | 64 | 129 | 5.6 | 1 |
| 2 | 51 | 23.1 | 74   | 1 | 1 | 1 | 0 | 0 | 0 | 122 | 80  | 67 | 7.5  | 7.4  | 7.45  | 95  | 10 | 0.75 | 186 | 75  | 40 | 133 | 5.4 | 0 |
| 1 | 50 | 23.3 | 83   | 2 | 2 | 2 | 0 | 0 | 0 | 120 | 78  | 52 | 7.7  | 7.5  | 7.6   | 90  | 10 | 0.91 | 224 | 62  | 67 | 153 | 5.6 | 1 |
| 1 | 52 | 25.4 | 89   | 2 | 1 | 1 | 1 | 0 | 1 | 137 | 98  | 67 | 6.7  | 7.3  | 7     | 120 | 13 | 0.9  | 127 | 381 | 45 | 44  | 5.9 | 1 |
| 1 | 55 | 24.2 | 88.5 | 2 | 1 | 2 | 1 | 0 | 0 | 145 | 101 | 81 | 7.7  | 7.9  | 7.8   | 87  | 10 | 0.7  | 172 | 44  | 67 | 91  | 4.9 | 1 |
| 1 | 39 | 16.5 | 67.5 | 2 | 1 | 2 | 0 | 0 | 0 | 121 | 81  | 62 | 7.8  | 7.5  | 7.65  | 84  | 13 | 0.93 | 182 | 66  | 87 | 98  | 5.6 | 1 |
| 1 | 52 | 27.4 | 91   | 2 | 2 | 1 | 1 | 1 | 1 | 137 | 83  | 73 | 7    | 7.1  | 7.05  | 147 | 30 | 0.78 | 129 | 252 | 47 | 46  | 6.8 | 1 |
| 1 | 51 | 24.4 | 92   | 2 | 1 | 2 | 0 | 0 | 1 | 108 | 77  | 69 | 8.4  | 8    | 8.2   | 86  | 15 | 0.91 | 246 | 137 | 48 | 175 | 5.6 | 1 |
| 1 | 55 | 24.8 | 89   | 1 | 1 | 1 | 0 | 0 | 1 | 122 | 85  | 67 | 7.9  | 8.1  | 8     | 113 | 12 | 1    | 150 | 97  | 51 | 96  | 6   | 1 |



|   |    |      |      |   |   |   |   |   |   |     |     |    |      |      |       |     |    |      |     |     |    |     |      |   |
|---|----|------|------|---|---|---|---|---|---|-----|-----|----|------|------|-------|-----|----|------|-----|-----|----|-----|------|---|
| 1 | 63 | 26.3 | 93.5 | 2 | 1 | 1 | 1 | 0 | 1 | 124 | 80  | 78 | 11.4 | 7.5  | 9.45  | 101 | 10 | 0.82 | 160 | 60  | 55 | 103 | 6.1  | 1 |
| 1 | 41 | 29.4 | 98   | 1 | 1 | 2 | 1 | 1 | 1 | 136 | 92  | 83 | 7.2  | 6.9  | 7.05  | 311 | 14 | 0.73 | 208 | 193 | 39 | 143 | 13.2 | 1 |
| 2 | 52 | 20.4 | 78   | 1 | 2 | 1 | 0 | 0 | 0 | 119 | 76  | 56 | 7.7  | 8.1  | 7.9   | 98  | 9  | 0.63 | 205 | 72  | 58 | 137 | 5.5  | 1 |
| 2 | 43 | 22.1 | 73   | 2 | 1 | 2 | 1 | 0 | 0 | 135 | 91  | 61 | 5.8  | 5.8  | 5.8   | 84  | 7  | 0.53 | 172 | 134 | 53 | 98  | 5.3  | 0 |
| 1 | 35 | 22.7 | 79   | 2 | 1 | 2 | 0 | 0 | 1 | 139 | 89  | 60 | 6.5  | 6.5  | 6.5   | 91  | 8  | 0.95 | 137 | 89  | 27 | 101 | 5.4  | 1 |
| 1 | 42 | 24.7 | 91   | 2 | 1 | 1 | 0 | 0 | 1 | 115 | 75  | 59 | 7.8  | 7.6  | 7.7   | 84  | 15 | 0.82 | 227 | 124 | 45 | 163 | 5.4  | 0 |
| 1 | 73 | 23.8 | 81   | 2 | 1 | 2 | 1 | 0 | 1 | 178 | 84  | 62 | 12.3 | 12.5 | 12.4  | 105 | 15 | 0.84 | 130 | 167 | 51 | 63  | 5.6  | 0 |
| 1 | 54 | 22.4 | 83.5 | 2 | 1 | 2 | 1 | 0 | 0 | 125 | 79  | 62 | 8.7  | 8.5  | 8.6   | 93  | 11 | 1    | 171 | 63  | 50 | 115 | 5.4  | 1 |
| 1 | 55 | 23.8 | 80   | 2 | 1 | 2 | 0 | 0 | 1 | 132 | 87  | 52 | 8.2  | 8.4  | 8.3   | 100 | 17 | 1.18 | 218 | 75  | 70 | 137 | 5.4  | 1 |
| 1 | 56 | 26.1 | 91   | 1 | 1 | 2 | 0 | 0 | 0 | 116 | 78  | 72 | 6.4  | 6.6  | 6.5   | 99  | 18 | 0.93 | 178 | 69  | 43 | 127 | 5.8  | 1 |
| 2 | 45 | 20.0 | 70   | 1 | 1 | 1 | 0 | 0 | 0 | 110 | 74  | 49 | 7.4  | 7.5  | 7.45  | 94  | 12 | 0.77 | 216 | 82  | 56 | 148 | 5.3  | 1 |
| 1 | 48 | 21.1 | 78   | 1 | 1 | 2 | 0 | 0 | 1 | 133 | 82  | 66 | 7.2  | 7.2  | 7.2   | 92  | 13 | 1.09 | 198 | 57  | 56 | 129 | 5.4  | 0 |
| 1 | 52 | 24.9 | 85   | 2 | 2 | 2 | 1 | 0 | 0 | 147 | 99  | 71 | 7.7  | 7.7  | 7.7   | 113 | 19 | 0.84 | 167 | 161 | 43 | 108 | 5.3  | 1 |
| 2 | 54 | 27.7 | 94   | 1 | 1 | 2 | 1 | 0 | 1 | 136 | 92  | 68 | 8.5  | 10.4 | 9.45  | 114 | 11 | 0.65 | 224 | 106 | 40 | 168 | 5.7  | 0 |
| 1 | 52 | 26.6 | 94   | 2 | 2 | 2 | 0 | 0 | 0 | 138 | 86  | 71 | 6.3  | 6.3  | 6.3   | 97  | 12 | 0.97 | 219 | 136 | 60 | 147 | 5.9  | 0 |
| 1 | 42 | 25.7 | 90   | 2 | 1 | 2 | 1 | 0 | 0 | 136 | 92  | 68 | 7.5  | 7.6  | 7.55  | 98  | 10 | 0.87 | 186 | 134 | 43 | 134 | 5.6  | 0 |
| 2 | 60 | 28.3 | 88   | 1 | 1 | 1 | 0 | 0 | 0 | 120 | 73  | 62 | 6.5  | 6.4  | 6.45  | 102 | 13 | 0.74 | 216 | 78  | 57 | 145 | 5.5  | 1 |
| 1 | 51 | 22.2 | 83   | 2 | 2 | 2 | 0 | 0 | 0 | 123 | 72  | 53 | 7.5  | 7.3  | 7.4   | 98  | 7  | 0.93 | 225 | 101 | 61 | 140 | 5.4  | 0 |
| 1 | 51 | 27.1 | 85.5 | 2 | 1 | 1 | 0 | 0 | 0 | 136 | 89  | 89 | 6.9  | 7    | 6.95  | 125 | 11 | 1    | 205 | 57  | 99 | 110 | 6.2  | 0 |
| 2 | 46 | 22.8 | 78.5 | 1 | 1 | 1 | 0 | 0 | 0 | 104 | 58  | 65 | 6.2  | 6.5  | 6.35  | 76  | 12 | 0.74 | 164 | 43  | 55 | 100 | 5    | 1 |
| 1 | 46 | 22.9 | 84   | 2 | 1 | 2 | 0 | 0 | 0 | 119 | 80  | 61 | 7.4  | 7.4  | 7.4   | 91  | 13 | 0.9  | 178 | 99  | 58 | 99  | 5.4  | 0 |
| 1 | 52 | 19.8 | 80   | 2 | 1 | 2 | 1 | 0 | 0 | 131 | 90  | 74 | 7.8  | 7.5  | 7.65  | 98  | 14 | 1.07 | 184 | 91  | 46 | 126 | 5.5  | 1 |
| 2 | 55 | 23.1 | 83.5 | 1 | 1 | 2 | 0 | 0 | 1 | 127 | 77  | 64 | 6.3  | 6.1  | 6.2   | 91  | 13 | 0.58 | 230 | 180 | 45 | 163 | 5.7  | 1 |
| 1 | 65 | 22.9 | 83   | 2 | 2 | 1 | 1 | 1 | 1 | 178 | 104 | 83 | 10.7 | 9.8  | 10.25 | 267 | 14 | 0.76 | 241 | 110 | 73 | 161 | 8.8  | 1 |
| 1 | 51 | 22.6 | 80   | 2 | 1 | 2 | 0 | 0 | 1 | 121 | 86  | 73 | 10.2 | 8.3  | 9.25  | 97  | 14 | 0.9  | 190 | 81  | 55 | 129 | 5.9  | 1 |
| 1 | 49 | 38.4 | 120  | 2 | 1 | 2 | 1 | 1 | 1 | 166 | 92  | 91 | 7.3  | 6.8  | 7.05  | 220 | 10 | 0.83 | 129 | 146 | 36 | 83  | 9.9  | 0 |
| 2 | 54 | 23.9 | 86   | 1 | 1 | 1 | 0 | 0 | 1 | 127 | 79  | 68 | 6.9  | 7    | 6.95  | 104 | 16 | 0.67 | 240 | 60  | 73 | 156 | 5.8  | 0 |
| 1 | 43 | 20.5 | 75.5 | 2 | 1 | 2 | 0 | 0 | 0 | 131 | 84  | 76 | 7.4  | 7.3  | 7.35  | 103 | 14 | 1.04 | 234 | 143 | 63 | 137 | 5.4  | 0 |
| 1 | 32 | 24.2 | 90   | 1 | 1 | 2 | 1 | 0 | 0 | 131 | 93  | 71 | 7.4  | 7.3  | 7.35  | 110 | 11 | 0.83 | 174 | 189 | 49 | 101 | 5.3  | 1 |

|   |    |      |      |   |   |   |   |   |   |     |     |    |      |      |      |     |    |      |     |     |    |     |     |   |
|---|----|------|------|---|---|---|---|---|---|-----|-----|----|------|------|------|-----|----|------|-----|-----|----|-----|-----|---|
| 1 | 41 | 19.4 | 76.5 | 2 | 1 | 1 | 0 | 0 | 0 | 115 | 76  | 77 | 7.9  | 7.7  | 7.8  | 105 | 18 | 1.06 | 187 | 175 | 43 | 127 | 5.8 | 0 |
| 1 | 38 | 27.7 | 92   | 2 | 1 | 1 | 0 | 0 | 1 | 129 | 77  | 56 | 6.7  | 6.8  | 6.75 | 97  | 9  | 0.83 | 246 | 145 | 53 | 173 | 5.4 | 1 |
| 1 | 33 | 26.6 | 96.5 | 2 | 2 | 1 | 0 | 0 | 0 | 131 | 73  | 51 | 6.8  | 6.7  | 6.75 | 97  | 15 | 0.94 | 200 | 105 | 43 | 144 | 5.7 | 1 |
| 1 | 56 | 20.9 | 75   | 1 | 1 | 2 | 0 | 0 | 0 | 112 | 82  | 70 | 8.7  | 8.9  | 8.8  | 100 | 15 | 0.97 | 203 | 73  | 69 | 117 | 5.4 | 1 |
| 1 | 48 | 23.6 | 85.6 | 2 | 1 | 2 | 0 | 0 | 0 | 132 | 87  | 62 | 7.8  | 7.8  | 7.8  | 93  | 16 | 1.04 | 223 | 89  | 62 | 146 | 5.4 | 0 |
| 1 | 63 | 22.7 | 87   | 2 | 1 | 1 | 1 | 1 | 1 | 153 | 100 | 53 | 10.8 | 10.2 | 10.5 | 168 | 10 | 0.64 | 162 | 107 | 69 | 87  | 7.8 | 1 |
| 1 | 52 | 23.5 | 84   | 2 | 1 | 1 | 0 | 0 | 1 | 107 | 67  | 62 | 7.6  | 7.7  | 7.65 | 93  | 16 | 0.81 | 204 | 241 | 52 | 128 | 5.5 | 1 |
| 1 | 52 | 22.5 | 87   | 1 | 2 | 1 | 0 | 1 | 0 | 130 | 85  | 65 | 9    | 8.1  | 8.55 | 147 | 15 | 0.91 | 194 | 98  | 45 | 134 | 6.6 | 1 |
| 1 | 53 | 30.7 | 102  | 1 | 1 | 1 | 1 | 0 | 1 | 175 | 109 | 99 | 7.8  | 7.2  | 7.5  | 113 | 12 | 0.9  | 177 | 105 | 37 | 127 | 5.9 | 1 |
| 2 | 43 | 22.8 | 78   | 1 | 1 | 1 | 0 | 0 | 0 | 109 | 70  | 60 | 6.9  | 7    | 6.95 | 88  | 15 | 0.68 | 146 | 42  | 45 | 91  | 5.8 | 0 |
| 2 | 31 | 20.8 | 79.2 | 1 | 1 | 1 | 0 | 0 | 0 | 112 | 75  | 68 | 6.6  | 6.5  | 6.55 | 95  | 13 | 0.67 | 224 | 46  | 56 | 151 | 5.4 | 1 |
| 1 | 53 | 37.9 | 120  | 2 | 2 | 1 | 1 | 0 | 0 | 173 | 117 | 83 | 8    | 7.8  | 7.9  | 115 | 10 | 0.89 | 210 | 176 | 53 | 145 | 5.8 | 1 |
| 1 | 52 | 27.7 | 98   | 2 | 1 | 1 | 1 | 0 | 0 | 148 | 98  | 64 | 9.4  | 7.5  | 8.45 | 87  | 13 | 1.02 | 189 | 126 | 54 | 120 | 5.4 | 0 |
| 1 | 26 | 24.8 | 80.5 | 2 | 1 | 2 | 0 | 0 | 0 | 123 | 68  | 64 | 6.2  | 6.2  | 6.2  | 75  | 19 | 1.05 | 177 | 96  | 56 | 118 | 5.2 | 0 |
| 1 | 43 | 26.7 | 89   | 2 | 1 | 2 | 1 | 0 | 1 | 155 | 94  | 64 | 6.6  | 6.6  | 6.6  | 99  | 18 | 1.01 | 140 | 137 | 38 | 55  | 5.4 | 0 |
| 1 | 52 | 27.0 | 93   | 2 | 1 | 2 | 1 | 0 | 0 | 133 | 92  | 59 | 7.7  | 7.8  | 7.75 | 100 | 13 | 0.8  | 196 | 109 | 47 | 135 | 5.5 | 1 |
| 1 | 51 | 21.6 | 81.5 | 1 | 1 | 2 | 1 | 0 | 1 | 156 | 102 | 59 | 10.7 | 8.6  | 9.65 | 103 | 14 | 0.97 | 179 | 211 | 36 | 114 | 5.4 | 1 |
| 1 | 67 | 24.5 | 90   | 2 | 1 | 2 | 1 | 0 | 0 | 128 | 89  | 73 | 9.3  | 9    | 9.15 | 123 | 19 | 0.97 | 200 | 143 | 65 | 122 | 5.8 | 1 |
| 2 | 45 | 19.6 | 73   | 1 | 1 | 1 | 0 | 0 | 0 | 114 | 72  | 61 | 7.4  | 7.5  | 7.45 | 88  | 13 | 0.62 | 146 | 44  | 59 | 76  | 5.4 | 1 |
| 2 | 36 | 19.1 | 70   | 1 | 1 | 1 | 0 | 0 | 0 | 102 | 72  | 62 | 6.6  | 6.7  | 6.65 | 85  | 10 | 0.48 | 159 | 39  | 50 | 92  | 5.2 | 1 |
| 2 | 30 | 22.5 | 79.5 | 1 | 1 | 1 | 0 | 0 | 1 | 115 | 67  | 52 | 8.2  | 8.2  | 8.2  | 91  | 13 | 0.73 | 165 | 187 | 34 | 101 | 5.1 | 1 |
| 2 | 47 | 23.9 | 78.5 | 1 | 1 | 1 | 0 | 0 | 0 | 122 | 82  | 52 | 5.8  | 5.6  | 5.7  | 86  | 14 | 0.76 | 199 | 165 | 49 | 133 | 5.4 | 0 |
| 1 | 57 | 22.1 | 84   | 1 | 1 | 2 | 1 | 1 | 0 | 124 | 91  | 73 | 8.1  | 7.2  | 7.65 | 102 | 11 | 0.78 | 143 | 70  | 49 | 92  | 6.3 | 1 |
| 2 | 54 | 22.3 | 85   | 1 | 1 | 1 | 0 | 0 | 0 | 114 | 70  | 49 | 8.1  | 8.2  | 8.15 | 90  | 13 | 0.63 | 177 | 63  | 46 | 126 | 6   | 1 |
| 1 | 47 | 23.7 | 84   | 2 | 1 | 2 | 0 | 0 | 0 | 120 | 85  | 60 | 7.5  | 7.6  | 7.55 | 81  | 13 | 1.26 | 177 | 92  | 43 | 122 | 5.6 | 1 |
| 2 | 45 | 27.1 | 94   | 2 | 2 | 2 | 1 | 0 | 0 | 150 | 99  | 59 | 7.1  | 6.4  | 6.75 | 104 | 17 | 0.59 | 181 | 59  | 81 | 104 | 5.8 | 1 |
| 1 | 52 | 23.8 | 86   | 2 | 1 | 2 | 1 | 0 | 1 | 120 | 90  | 65 | 7.7  | 8.1  | 7.9  | 113 | 13 | 1.17 | 153 | 87  | 55 | 90  | 5.8 | 0 |
| 2 | 61 | 22.9 | 78   | 1 | 1 | 2 | 1 | 0 | 1 | 149 | 85  | 64 | 10.2 | 9.8  | 10   | 85  | 9  | 0.54 | 165 | 67  | 39 | 108 | 5.1 | 0 |
| 1 | 64 | 23.8 | 90   | 2 | 1 | 2 | 1 | 0 | 0 | 127 | 84  | 53 | 8.1  | 8.4  | 8.25 | 102 | 19 | 1.12 | 202 | 166 | 49 | 137 | 5.6 | 1 |

|   |    |      |       |   |   |   |   |   |   |     |     |    |     |     |      |     |    |      |     |     |    |     |     |   |
|---|----|------|-------|---|---|---|---|---|---|-----|-----|----|-----|-----|------|-----|----|------|-----|-----|----|-----|-----|---|
| 1 | 60 | 30.1 | 105   | 2 | 2 | 1 | 1 | 0 | 0 | 159 | 106 | 83 | 9.8 | 9.6 | 9.7  | 118 | 7  | 0.61 | 230 | 166 | 65 | 132 | 5.6 | 1 |
| 2 | 41 | 24.5 | 76    | 1 | 1 | 1 | 1 | 1 | 1 | 154 | 111 | 67 | 7.7 | 6.9 | 7.3  | 174 | 13 | 0.6  | 163 | 200 | 43 | 101 | 7.9 | 1 |
| 1 | 44 | 24.8 | 94    | 2 | 2 | 1 | 0 | 0 | 0 | 116 | 80  | 65 | 6.9 | 6.7 | 6.8  | 97  | 19 | 0.91 | 194 | 183 | 46 | 126 | 5.4 | 0 |
| 1 | 55 | 28.4 | 94    | 2 | 1 | 2 | 1 | 0 | 1 | 124 | 89  | 55 | 8.6 | 8.2 | 8.4  | 99  | 19 | 1.09 | 198 | 181 | 39 | 140 | 5.6 | 1 |
| 1 | 46 | 26.0 | 88    | 2 | 1 | 2 | 1 | 0 | 1 | 127 | 85  | 79 | 7.4 | 7.9 | 7.65 | 96  | 13 | 1.07 | 223 | 147 | 53 | 156 | 5.5 | 0 |
| 1 | 45 | 29.1 | 94    | 2 | 2 | 2 | 0 | 0 | 0 | 109 | 73  | 56 | 7   | 7.3 | 7.15 | 102 | 9  | 1.07 | 179 | 90  | 47 | 118 | 5.5 | 0 |
| 1 | 60 | 26.5 | 106.5 | 2 | 2 | 1 | 1 | 0 | 1 | 151 | 97  | 64 | 7.8 | 7.7 | 7.75 | 101 | 14 | 0.68 | 240 | 95  | 41 | 177 | 5.7 | 1 |
| 1 | 50 | 23.3 | 95    | 2 | 1 | 2 | 0 | 0 | 0 | 138 | 95  | 62 | 8.4 | 8.3 | 8.35 | 95  | 8  | 0.97 | 205 | 99  | 57 | 135 | 5.4 | 1 |
| 1 | 51 | 29.1 | 100.5 | 2 | 1 | 2 | 0 | 0 | 1 | 111 | 78  | 53 | 7.5 | 7.4 | 7.45 | 93  | 17 | 0.98 | 205 | 149 | 28 | 130 | 5.4 | 1 |
| 1 | 53 | 24.7 | 97    | 2 | 2 | 1 | 0 | 0 | 0 | 121 | 83  | 82 | 8.4 | 8.1 | 8.25 | 118 | 13 | 0.86 | 168 | 91  | 42 | 115 | 5.6 | 0 |
| 1 | 51 | 25.5 | 88    | 2 | 2 | 1 | 1 | 0 | 0 | 134 | 101 | 61 | 7.1 | 7.4 | 7.25 | 109 | 13 | 0.82 | 185 | 191 | 40 | 103 | 5.5 | 1 |
| 1 | 68 | 23.4 | 88    | 1 | 1 | 2 | 0 | 0 | 0 | 133 | 88  | 79 | 6.8 | 7   | 6.9  | 92  | 19 | 1.06 | 187 | 48  | 57 | 111 | 5.4 | 1 |
| 1 | 48 | 29.0 | 95    | 2 | 1 | 2 | 1 | 0 | 1 | 142 | 105 | 80 | 6.7 | 7   | 6.85 | 110 | 14 | 1.04 | 231 | 340 | 51 | 113 | 5.8 | 1 |
| 1 | 45 | 26.1 | 90    | 2 | 1 | 1 | 0 | 1 | 1 | 124 | 78  | 77 | 6.6 | 6.8 | 6.7  | 133 | 14 | 0.72 | 192 | 438 | 27 | 90  | 7.6 | 0 |
| 1 | 44 | 29.7 | 103   | 2 | 2 | 2 | 0 | 0 | 1 | 126 | 84  | 58 | 6.7 | 6.7 | 6.7  | 91  | 11 | 1.02 | 241 | 67  | 55 | 161 | 5.4 | 1 |
| 1 | 52 | 24.0 | 84    | 2 | 1 | 1 | 0 | 1 | 1 | 126 | 84  | 71 | 8.4 | 8.3 | 8.35 | 149 | 14 | 0.95 | 166 | 129 | 57 | 92  | 7   | 1 |
| 1 | 46 | 24.4 | 91    | 2 | 1 | 1 | 0 | 1 | 1 | 131 | 88  | 69 | 6.9 | 6.9 | 6.9  | 142 | 14 | 0.9  | 258 | 91  | 43 | 180 | 6.8 | 1 |
| 1 | 48 | 23.3 | 83    | 2 | 2 | 2 | 1 | 0 | 0 | 116 | 81  | 61 | 7.1 | 7.2 | 7.15 | 96  | 14 | 0.91 | 178 | 66  | 71 | 96  | 5.4 | 1 |
| 1 | 48 | 23.3 | 79.5  | 2 | 1 | 1 | 0 | 0 | 0 | 116 | 70  | 67 | 7.4 | 7.5 | 7.45 | 101 | 10 | 0.93 | 209 | 97  | 49 | 138 | 5.5 | 1 |
| 1 | 49 | 36.8 | 116   | 2 | 2 | 2 | 1 | 1 | 1 | 132 | 85  | 83 | 6.9 | 7.3 | 7.1  | 111 | 17 | 1.31 | 239 | 258 | 39 | 145 | 7.3 | 1 |
| 1 | 56 | 21.7 | 80    | 1 | 1 | 1 | 1 | 1 | 0 | 139 | 93  | 65 | 8.3 | 8.2 | 8.25 | 127 | 17 | 1.05 | 232 | 124 | 70 | 152 | 5.4 | 1 |
| 1 | 58 | 24.3 | 90    | 2 | 1 | 2 | 0 | 1 | 1 | 136 | 79  | 54 | 7.5 | 7.4 | 7.45 | 102 | 17 | 0.89 | 214 | 181 | 37 | 144 | 6.7 | 0 |
| 1 | 31 | 28.7 | 98    | 2 | 2 | 2 | 0 | 0 | 1 | 127 | 85  | 62 | 7.3 | 6.9 | 7.1  | 110 | 11 | 0.81 | 222 | 289 | 51 | 134 | 5.4 | 0 |
| 2 | 56 | 21.4 | 76    | 1 | 1 | 2 | 0 | 0 | 0 | 103 | 72  | 54 | 7.3 | 7.3 | 7.3  | 90  | 12 | 0.64 | 199 | 90  | 67 | 123 | 5.5 | 0 |
| 2 | 53 | 21.3 | 76    | 1 | 1 | 2 | 0 | 0 | 0 | 129 | 89  | 62 | 7.2 | 7.6 | 7.4  | 99  | 13 | 0.68 | 144 | 62  | 63 | 76  | 6.1 | 0 |
| 1 | 39 | 22.4 | 80.5  | 1 | 2 | 2 | 1 | 0 | 0 | 133 | 94  | 62 | 7.1 | 6.8 | 6.95 | 94  | 11 | 0.84 | 179 | 38  | 90 | 93  | 5.3 | 1 |
| 1 | 42 | 21.1 | 77    | 2 | 1 | 2 | 0 | 0 | 0 | 109 | 74  | 62 | 6.8 | 6.8 | 6.8  | 105 | 11 | 0.92 | 203 | 46  | 74 | 120 | 5.3 | 0 |
| 1 | 49 | 28.1 | 97    | 2 | 2 | 1 | 0 | 0 | 0 | 127 | 83  | 61 | 7.4 | 7.3 | 7.35 | 105 | 15 | 1    | 216 | 174 | 46 | 154 | 5.7 | 1 |
| 1 | 47 | 26.8 | 94    | 2 | 2 | 1 | 1 | 1 | 1 | 127 | 98  | 81 | 9.2 | 7.7 | 8.45 | 162 | 12 | 0.94 | 250 | 261 | 45 | 176 | 7.4 | 0 |

|   |    |      |      |   |   |   |   |   |   |     |    |    |     |     |      |     |    |      |     |     |    |     |     |   |
|---|----|------|------|---|---|---|---|---|---|-----|----|----|-----|-----|------|-----|----|------|-----|-----|----|-----|-----|---|
| 1 | 49 | 22.2 | 84   | 1 | 2 | 2 | 1 | 0 | 1 | 130 | 91 | 70 | 7.4 | 7.4 | 7.4  | 97  | 19 | 0.85 | 254 | 122 | 58 | 180 | 5.6 | 0 |
| 1 | 42 | 25.7 | 88   | 2 | 2 | 2 | 1 | 0 | 0 | 125 | 91 | 53 | 7.5 | 7.7 | 7.6  | 98  | 19 | 1.05 | 180 | 176 | 42 | 113 | 5.2 | 0 |
| 2 | 59 | 21.3 | 83   | 2 | 2 | 2 | 0 | 0 | 0 | 134 | 87 | 78 | 7.8 | 7.4 | 7.6  | 100 | 17 | 0.68 | 209 | 112 | 49 | 142 | 5.8 | 1 |
| 1 | 51 | 25.9 | 92   | 2 | 2 | 2 | 1 | 0 | 0 | 120 | 88 | 82 | 6.3 | 6.5 | 6.4  | 88  | 13 | 1.16 | 235 | 151 | 85 | 139 | 5.3 | 1 |
| 1 | 49 | 23.1 | 86   | 1 | 1 | 2 | 0 | 0 | 0 | 124 | 79 | 65 | 7.7 | 8   | 7.85 | 91  | 18 | 1.04 | 198 | 67  | 60 | 121 | 5.5 | 1 |
| 2 | 44 | 20.9 | 74.5 | 1 | 1 | 1 | 0 | 0 | 0 | 107 | 68 | 77 | 6.8 | 6.9 | 6.85 | 87  | 15 | 0.78 | 213 | 36  | 86 | 120 | 5.3 | 0 |
| 2 | 69 | 24.1 | 82   | 1 | 1 | 1 | 1 | 0 | 1 | 135 | 84 | 54 | 9.4 | 9.6 | 9.5  | 101 | 18 | 0.75 | 215 | 219 | 56 | 120 | 5.9 | 1 |
| 1 | 45 | 23.8 | 89   | 2 | 1 | 2 | 0 | 0 | 1 | 122 | 86 | 69 | 6.9 | 6.9 | 6.9  | 100 | 11 | 1.1  | 238 | 158 | 61 | 150 | 5.4 | 0 |
| 2 | 58 | 21.3 | 76   | 1 | 1 | 2 | 0 | 0 | 0 | 117 | 79 | 54 | 7.4 | 7.6 | 7.5  | 103 | 13 | 0.7  | 221 | 115 | 55 | 143 | 5.6 | 0 |
| 1 | 49 | 23.0 | 84   | 1 | 1 | 2 | 0 | 0 | 1 | 120 | 79 | 63 | 7.5 | 7.4 | 7.45 | 103 | 12 | 0.84 | 247 | 92  | 48 | 178 | 5.5 | 0 |
| 1 | 47 | 24.3 | 93   | 1 | 1 | 1 | 0 | 0 | 1 | 134 | 89 | 61 | 6.8 | 6.9 | 6.85 | 98  | 18 | 0.91 | 193 | 252 | 50 | 103 | 5.6 | 1 |
| 1 | 51 | 27.4 | 93   | 1 | 1 | 1 | 0 | 0 | 1 | 127 | 84 | 58 | 6.8 | 7   | 6.9  | 107 | 17 | 1.07 | 161 | 171 | 53 | 82  | 5.8 | 0 |
| 1 | 51 | 25.6 | 89   | 1 | 2 | 1 | 0 | 0 | 0 | 123 | 87 | 67 | 6.6 | 6.7 | 6.65 | 80  | 15 | 0.94 | 176 | 90  | 46 | 118 | 5.6 | 1 |
| 1 | 46 | 23.3 | 87   | 2 | 1 | 1 | 1 | 0 | 1 | 141 | 93 | 74 | 7.6 | 7.4 | 7.5  | 120 | 16 | 0.94 | 256 | 268 | 59 | 156 | 5.6 | 1 |
| 1 | 50 | 25.0 | 91   | 2 | 1 | 1 | 1 | 0 | 1 | 149 | 96 | 45 | 7.6 | 8   | 7.8  | 93  | 19 | 0.85 | 222 | 114 | 74 | 132 | 5.9 | 1 |
| 1 | 61 | 23.6 | 81   | 2 | 1 | 1 | 0 | 0 | 0 | 111 | 73 | 47 | 7.2 | 6.9 | 7.05 | 77  | 13 | 0.77 | 168 | 63  | 48 | 106 | 5.1 | 0 |
| 2 | 61 | 20.2 | 76   | 1 | 1 | 1 | 0 | 0 | 0 | 114 | 75 | 81 | 7.5 | 7.5 | 7.5  | 103 | 14 | 0.72 | 214 | 53  | 81 | 120 | 5.7 | 1 |
| 2 | 57 | 22.4 | 76   | 1 | 1 | 2 | 0 | 0 | 1 | 117 | 80 | 65 | 8.8 | 8.7 | 8.75 | 109 | 20 | 0.72 | 243 | 125 | 66 | 143 | 5.9 | 1 |
| 1 | 43 | 25.3 | 98   | 1 | 1 | 2 | 0 | 0 | 0 | 138 | 88 | 72 | 6   | 5.9 | 5.95 | 90  | 14 | 1.03 | 181 | 72  | 45 | 122 | 5.4 | 0 |
| 1 | 57 | 25.5 | 94   | 2 | 2 | 2 | 1 | 0 | 1 | 128 | 88 | 61 | 7.1 | 7.1 | 7.1  | 109 | 10 | 0.67 | 188 | 140 | 39 | 130 | 5.6 | 1 |
| 1 | 58 | 24.1 | 101  | 2 | 1 | 1 | 0 | 0 | 1 | 129 | 96 | 56 | 8.4 | 8.2 | 8.3  | 105 | 12 | 0.83 | 250 | 72  | 59 | 163 | 5.4 | 1 |
| 1 | 36 | 25.2 | 94   | 2 | 1 | 2 | 0 | 0 | 0 | 131 | 89 | 67 | 5.7 | 5.8 | 5.75 | 85  | 12 | 1.08 | 170 | 52  | 64 | 98  | 5   | 1 |
| 1 | 49 | 33.9 | 107  | 2 | 1 | 2 | 1 | 0 | 1 | 145 | 90 | 61 | 5.9 | 5.6 | 5.75 | 86  | 12 | 1.08 | 172 | 199 | 38 | 116 | 5.5 | 1 |
| 1 | 52 | 23.0 | 95   | 2 | 2 | 2 | 1 | 0 | 0 | 132 | 91 | 74 | 6.9 | 6.8 | 6.85 | 119 | 18 | 0.98 | 183 | 115 | 59 | 96  | 5.8 | 0 |
| 1 | 46 | 23.6 | 82.5 | 2 | 2 | 2 | 1 | 1 | 1 | 141 | 92 | 69 | 7.4 | 7.4 | 7.4  | 137 | 14 | 1.04 | 228 | 176 | 47 | 144 | 6.2 | 0 |
| 1 | 53 | 23.3 | 90   | 2 | 1 | 1 | 1 | 0 | 1 | 138 | 94 | 89 | 8.3 | 8.4 | 8.35 | 114 | 12 | 0.92 | 154 | 180 | 47 | 93  | 5.6 | 1 |
| 1 | 63 | 23.6 | 88   | 2 | 2 | 2 | 1 | 1 | 1 | 150 | 97 | 72 | 9.9 | 9.6 | 9.75 | 129 | 15 | 0.98 | 220 | 285 | 43 | 119 | 6.8 | 1 |
| 1 | 51 | 27.7 | 94   | 2 | 1 | 2 | 1 | 0 | 1 | 133 | 91 | 50 | 8.2 | 7.8 | 8    | 96  | 19 | 0.94 | 181 | 104 | 39 | 131 | 5.6 | 1 |
| 1 | 54 | 25.8 | 89   | 2 | 2 | 2 | 1 | 0 | 0 | 119 | 88 | 61 | 7.9 | 8   | 7.95 | 105 | 15 | 0.68 | 205 | 101 | 52 | 136 | 5.5 | 0 |

|   |    |      |      |   |   |   |   |   |   |     |     |    |      |      |      |     |    |      |     |     |     |     |     |   |
|---|----|------|------|---|---|---|---|---|---|-----|-----|----|------|------|------|-----|----|------|-----|-----|-----|-----|-----|---|
| 1 | 52 | 22.7 | 89   | 2 | 2 | 2 | 1 | 1 | 1 | 146 | 97  | 63 | 6.8  | 7    | 6.9  | 158 | 13 | 0.98 | 178 | 173 | 65  | 92  | 6.6 | 0 |
| 2 | 60 | 21.4 | 73   | 2 | 2 | 2 | 1 | 1 | 1 | 106 | 69  | 68 | 9.3  | 8.9  | 9.1  | 128 | 18 | 0.82 | 171 | 76  | 102 | 71  | 6.1 | 1 |
| 2 | 56 | 26.1 | 90   | 1 | 1 | 1 | 0 | 0 | 0 | 124 | 82  | 76 | 6.7  | 7    | 6.85 | 84  | 11 | 0.7  | 227 | 54  | 66  | 147 | 5.4 | 1 |
| 2 | 53 | 19.8 | 75.5 | 1 | 1 | 2 | 1 | 0 | 1 | 143 | 94  | 80 | 8    | 7.9  | 7.95 | 103 | 14 | 0.58 | 249 | 71  | 61  | 172 | 5.4 | 1 |
| 2 | 56 | 23.7 | 83   | 1 | 1 | 1 | 0 | 0 | 1 | 117 | 72  | 74 | 9.1  | 8.1  | 8.6  | 87  | 10 | 0.67 | 231 | 680 | 30  | 96  | 5.4 | 1 |
| 2 | 53 | 20.3 | 73   | 1 | 1 | 2 | 0 | 1 | 1 | 133 | 78  | 71 | 7.9  | 8.2  | 8.05 | 113 | 10 | 0.61 | 170 | 47  | 79  | 93  | 6.2 | 1 |
| 1 | 61 | 24.3 | 94   | 2 | 1 | 2 | 1 | 0 | 0 | 140 | 98  | 59 | 8.4  | 8.1  | 8.25 | 99  | 15 | 0.84 | 169 | 153 | 42  | 107 | 5.7 | 1 |
| 1 | 55 | 23.2 | 84   | 2 | 1 | 2 | 0 | 0 | 0 | 130 | 83  | 56 | 7.6  | 7.6  | 7.6  | 98  | 11 | 0.85 | 177 | 183 | 41  | 116 | 5.3 | 1 |
| 1 | 51 | 25.3 | 87   | 2 | 2 | 2 | 1 | 0 | 1 | 151 | 104 | 63 | 8.5  | 8    | 8.25 | 105 | 19 | 1.06 | 176 | 219 | 39  | 114 | 5.7 | 1 |
| 2 | 42 | 28.9 | 95   | 1 | 1 | 1 | 0 | 0 | 0 | 130 | 71  | 59 | 6.6  | 6.6  | 6.6  | 100 | 11 | 0.69 | 181 | 41  | 63  | 109 | 5.4 | 1 |
| 2 | 52 | 26.4 | 87   | 1 | 1 | 1 | 0 | 0 | 1 | 135 | 77  | 76 | 6.1  | 6.1  | 6.1  | 100 | 12 | 0.57 | 238 | 110 | 51  | 163 | 5.4 | 1 |
| 1 | 56 | 29.3 | 93.6 | 2 | 2 | 2 | 0 | 0 | 0 | 118 | 80  | 64 | 7.5  | 7.4  | 7.45 | 98  | 13 | 0.89 | 168 | 121 | 43  | 114 | 5.4 | 1 |
| 2 | 57 | 22.2 | 79   | 1 | 1 | 2 | 1 | 0 | 0 | 136 | 84  | 73 | 7.9  | 7.9  | 7.9  | 77  | 12 | 0.65 | 227 | 102 | 62  | 93  | 5.6 | 1 |
| 1 | 57 | 27.3 | 94   | 2 | 2 | 1 | 1 | 1 | 1 | 149 | 104 | 66 | 7.3  | 7.3  | 7.3  | 126 | 13 | 0.79 | 217 | 175 | 53  | 138 | 6.3 | 1 |
| 1 | 49 | 25.2 | 97   | 2 | 2 | 1 | 0 | 0 | 1 | 114 | 77  | 65 | 6.4  | 6.4  | 6.4  | 82  | 20 | 0.96 | 207 | 163 | 37  | 135 | 5.4 | 1 |
| 1 | 59 | 25.6 | 95   | 2 | 1 | 1 | 1 | 0 | 0 | 132 | 89  | 73 | 9.9  | 9.8  | 9.85 | 100 | 15 | 0.6  | 159 | 114 | 54  | 141 | 5.5 | 1 |
| 2 | 52 | 21.6 | 75   | 1 | 1 | 2 | 0 | 0 | 1 | 113 | 80  | 55 | 7.6  | 7.7  | 7.65 | 95  | 16 | 0.7  | 310 | 193 | 48  | 191 | 5.9 | 1 |
| 1 | 59 | 21.4 | 81   | 2 | 1 | 2 | 0 | 0 | 0 | 127 | 85  | 53 | 8.3  | 8.4  | 8.35 | 105 | 15 | 0.97 | 239 | 130 | 59  | 145 | 5.7 | 1 |
| 1 | 69 | 23.1 | 88   | 2 | 2 | 1 | 1 | 0 | 0 | 137 | 90  | 63 | 7.3  | 7.2  | 7.25 | 89  | 14 | 1.41 | 229 | 50  | 74  | 135 | 5.2 | 1 |
| 2 | 48 | 23.5 | 85   | 2 | 1 | 2 | 0 | 0 | 1 | 111 | 80  | 57 | 8.6  | 8.3  | 8.45 | 104 | 11 | 0.7  | 250 | 220 | 55  | 134 | 5.7 | 1 |
| 1 | 62 | 24.9 | 84   | 1 | 1 | 2 | 0 | 0 | 1 | 127 | 85  | 58 | 7.1  | 7.4  | 7.25 | 100 | 13 | 1.08 | 256 | 68  | 73  | 154 | 5.6 | 1 |
| 1 | 70 | 28.3 | 104  | 2 | 2 | 2 | 1 | 0 | 0 | 155 | 97  | 61 | 11.2 | 10.6 | 10.9 | 100 | 14 | 1.06 | 190 | 46  | 46  | 131 | 6.1 | 1 |
| 2 | 64 | 26.8 | 101  | 2 | 1 | 1 | 1 | 0 | 0 | 139 | 94  | 64 | 8.4  | 8.5  | 8.45 | 102 | 16 | 0.89 | 211 | 81  | 44  | 140 | 6.4 | 1 |
| 2 | 66 | 22.9 | 79   | 1 | 1 | 2 | 0 | 0 | 0 | 132 | 82  | 48 | 8.9  | 8.4  | 8.65 | 99  | 18 | 0.89 | 232 | 89  | 53  | 158 | 5.6 | 1 |
| 1 | 50 | 21.7 | 82   | 2 | 1 | 1 | 1 | 0 | 0 | 151 | 101 | 57 | 6.6  | 6.7  | 6.65 | 94  | 14 | 0.79 | 193 | 97  | 62  | 113 | 5.4 | 1 |
| 2 | 60 | 19.0 | 75   | 1 | 1 | 2 | 0 | 0 | 1 | 133 | 82  | 65 | 8.6  | 8.4  | 8.5  | 116 | 10 | 0.66 | 268 | 163 | 48  | 159 | 5.6 | 1 |
| 1 | 59 | 19.8 | 77   | 2 | 2 | 1 | 1 | 1 | 0 | 143 | 91  | 88 | 10.2 | 9.2  | 9.7  | 164 | 11 | 0.84 | 108 | 94  | 40  | 44  | 7.5 | 1 |
| 1 | 57 | 22.3 | 78   | 2 | 2 | 2 | 0 | 0 | 0 | 114 | 74  | 53 | 8.1  | 8    | 8.05 | 102 | 16 | 0.97 | 171 | 64  | 70  | 104 | 5.5 | 1 |
| 1 | 56 | 22.7 | 78.5 | 2 | 1 | 1 | 0 | 0 | 0 | 128 | 82  | 54 | 6.9  | 6.9  | 6.9  | 108 | 18 | 0.74 | 226 | 73  | 78  | 126 | 6.1 | 1 |

|   |    |      |      |   |   |   |   |   |   |     |     |    |      |      |      |     |    |      |     |     |    |     |     |   |
|---|----|------|------|---|---|---|---|---|---|-----|-----|----|------|------|------|-----|----|------|-----|-----|----|-----|-----|---|
| 1 | 75 | 29.8 | 102  | 2 | 1 | 2 | 1 | 0 | 1 | 128 | 84  | 55 | 8.5  | 8.4  | 8.45 | 98  | 10 | 0.75 | 158 | 112 | 48 | 145 | 5.8 | 1 |
| 1 | 56 | 28.7 | 97   | 2 | 2 | 2 | 1 | 0 | 1 | 136 | 102 | 88 | 7.4  | 7.5  | 7.45 | 113 | 13 | 0.99 | 237 | 134 | 46 | 172 | 5.8 | 1 |
| 1 | 53 | 27.5 | 88   | 1 | 1 | 1 | 1 | 0 | 1 | 133 | 97  | 70 | 8.3  | 7.5  | 7.9  | 92  | 17 | 1.16 | 174 | 110 | 35 | 124 | 5.6 | 1 |
| 1 | 52 | 28.4 | 94   | 2 | 1 | 2 | 0 | 0 | 1 | 137 | 87  | 67 | 7.7  | 7.6  | 7.65 | 94  | 15 | 1    | 193 | 186 | 43 | 131 | 5.7 | 1 |
| 1 | 63 | 28.7 | 103  | 2 | 1 | 2 | 1 | 0 | 1 | 144 | 92  | 68 | 7.9  | 7.7  | 7.8  | 105 | 13 | 0.85 | 182 | 340 | 39 | 110 | 5.6 | 1 |
| 2 | 54 | 24.0 | 85   | 1 | 1 | 2 | 0 | 0 | 1 | 130 | 79  | 56 | 7.2  | 7.4  | 7.3  | 87  | 12 | 0.8  | 264 | 72  | 63 | 186 | 5.7 | 1 |
| 1 | 68 | 24.8 | 84   | 1 | 1 | 1 | 0 | 0 | 1 | 130 | 78  | 83 | 6.5  | 6.2  | 6.35 | 96  | 16 | 1.06 | 260 | 135 | 42 | 167 | 6.1 | 1 |
| 1 | 51 | 26.0 | 91   | 2 | 1 | 2 | 0 | 0 | 1 | 115 | 77  | 54 | 7.6  | 7.4  | 7.5  | 108 | 12 | 1.2  | 218 | 79  | 42 | 157 | 5.5 | 0 |
| 2 | 67 | 20.6 | 81   | 1 | 1 | 1 | 0 | 0 | 0 | 111 | 78  | 84 | 8.4  | 8.9  | 8.65 | 87  | 10 | 0.63 | 210 | 51  | 59 | 141 | 5.4 | 1 |
| 1 | 66 | 25.5 | 90.5 | 1 | 1 | 2 | 0 | 0 | 0 | 122 | 83  | 60 | 7.6  | 7.5  | 7.55 | 87  | 16 | 1    | 233 | 193 | 57 | 139 | 5.4 | 0 |
| 1 | 55 | 27.6 | 99   | 2 | 2 | 1 | 1 | 0 | 1 | 135 | 92  | 71 | 10.6 | 11.2 | 10.9 | 118 | 16 | 0.95 | 268 | 60  | 57 | 201 | 6.1 | 1 |
| 1 | 65 | 26.1 | 90.5 | 1 | 1 | 1 | 1 | 0 | 0 | 132 | 78  | 56 | 7.4  | 7.4  | 7.4  | 93  | 19 | 1.04 | 213 | 39  | 69 | 128 | 5.4 | 0 |
| 2 | 55 | 20.2 | 72   | 2 | 2 | 2 | 1 | 0 | 0 | 143 | 88  | 53 | 7.5  | 7.4  | 7.45 | 96  | 6  | 0.68 | 178 | 133 | 79 | 75  | 5.5 | 0 |
| 1 | 52 | 25.3 | 89   | 2 | 2 | 2 | 1 | 0 | 1 | 136 | 91  | 50 | 7.4  | 7.1  | 7.25 | 89  | 13 | 0.78 | 204 | 209 | 38 | 123 | 5.3 | 1 |
| 1 | 59 | 24.3 | 95   | 2 | 1 | 1 | 1 | 0 | 0 | 126 | 86  | 62 | 7.3  | 7.8  | 7.55 | 107 | 13 | 0.84 | 214 | 89  | 57 | 135 | 5.7 | 0 |
| 1 | 57 | 32.2 | 104  | 2 | 2 | 2 | 1 | 0 | 1 | 139 | 92  | 61 | 7.1  | 7.2  | 7.15 | 92  | 14 | 1.04 | 224 | 75  | 42 | 166 | 5.7 | 0 |
| 2 | 68 | 20.2 | 85   | 1 | 1 | 1 | 1 | 0 | 0 | 137 | 92  | 83 | 11.3 | 10.1 | 10.7 | 103 | 16 | 0.83 | 213 | 131 | 66 | 106 | 5.4 | 0 |
| 1 | 53 | 26.4 | 95   | 1 | 1 | 1 | 1 | 0 | 1 | 122 | 95  | 71 | 8.7  | 12.5 | 10.6 | 90  | 14 | 0.97 | 253 | 73  | 64 | 163 | 5.5 | 1 |
| 1 | 64 | 26.7 | 89   | 2 | 2 | 2 | 1 | 0 | 1 | 143 | 96  | 73 | 10.6 | 8.9  | 9.75 | 109 | 16 | 1.04 | 186 | 69  | 64 | 108 | 5.9 | 0 |
| 2 | 57 | 22.3 | 81   | 1 | 1 | 2 | 0 | 0 | 0 | 123 | 88  | 78 | 7.1  | 7.3  | 7.2  | 106 | 11 | 0.68 | 210 | 142 | 56 | 125 | 6   | 0 |
| 2 | 74 | 24.2 | 88   | 1 | 1 | 2 | 1 | 1 | 1 | 103 | 61  | 52 | 24.8 | 26   | 25.4 | 159 | 29 | 0.97 | 262 | 162 | 51 | 160 | 7.5 | 1 |
| 2 | 57 | 21.5 | 81.5 | 1 | 1 | 2 | 1 | 0 | 1 | 173 | 115 | 70 | 8.3  | 8.3  | 8.3  | 97  | 19 | 0.75 | 251 | 71  | 81 | 149 | 5.7 | 1 |
