# Supplementary material for: Association between Helicobacter pylori infection and arterial stiffness: Results from a large cross-sectional study
Source: PLoS One. 2019 Aug 29;14(8):e0221643. doi: 10.1371/journal.pone.0221643 (PMC6715239; doi:10.1371/journal.pone.0221643)
Supplement: S1 Appendix — (PDF) [file pone.0221643.s004.pdf]

국문

## 건강 문진표

방문일: --

### 기본 정보

성명                      한글:                      영문: (성)                      (이름)

성별                      남 ☐                      여 ☐

생년월일:                      --

|            |
|------------|
| <b>질병력</b> |
|------------|

☐ 아래의 질환이 없다

| 질환명      | 질환있음                     | 현재 투약중                   | 비고                                                                  |
|----------|--------------------------|--------------------------|---------------------------------------------------------------------|
| 고혈압      | <input type="checkbox"/> | <input type="checkbox"/> |                                                                     |
| 당뇨병      | <input type="checkbox"/> | <input type="checkbox"/> |                                                                     |
| 고지혈증     | <input type="checkbox"/> | <input type="checkbox"/> |                                                                     |
| 협심증/심근경색 | <input type="checkbox"/> | <input type="checkbox"/> | <input type="checkbox"/> 관상동맥확장술/스텐트<br><input type="checkbox"/> 수술 |
| 뇌졸중 (중풍) | <input type="checkbox"/> | <input type="checkbox"/> |                                                                     |
| 만성신장질환   | <input type="checkbox"/> | <input type="checkbox"/> | <input type="checkbox"/> 신기능 저하<br><input type="checkbox"/> 투석 중    |
| 간경변      | <input type="checkbox"/> | <input type="checkbox"/> |                                                                     |
| 만성 B형 간염 | <input type="checkbox"/> | <input type="checkbox"/> |                                                                     |
| 만성 C형 간염 | <input type="checkbox"/> | <input type="checkbox"/> |                                                                     |
| 기타질환     | <input type="checkbox"/> |                          | <input type="checkbox"/> 부위:<br><input type="checkbox"/> 질환 명:      |

|   |                                                                                                                                                                                                                                                                                |
|---|--------------------------------------------------------------------------------------------------------------------------------------------------------------------------------------------------------------------------------------------------------------------------------|
| 암 | <input type="checkbox"/> 폐암 <input type="checkbox"/> 위암 <input type="checkbox"/> 대장암/직장암 <input type="checkbox"/> 간암<br><input type="checkbox"/> 유방암 <input type="checkbox"/> 자궁경부암 <input type="checkbox"/> 갑상선암 <input type="checkbox"/> 전립선암<br><input type="checkbox"/> 기타 |
|---|--------------------------------------------------------------------------------------------------------------------------------------------------------------------------------------------------------------------------------------------------------------------------------|

|       |                                                                                                                                                                                                                                                                                                                                                                                                                                                                                                                                                                                                    |
|-------|----------------------------------------------------------------------------------------------------------------------------------------------------------------------------------------------------------------------------------------------------------------------------------------------------------------------------------------------------------------------------------------------------------------------------------------------------------------------------------------------------------------------------------------------------------------------------------------------------|
| 복부 수술 | 수술부위:<br><div style="display: flex; justify-content: space-between;"> <div><input type="checkbox"/> 위/십이지장</div> <div><input type="checkbox"/> 대장/직장</div> <div><input type="checkbox"/> 맹장</div> </div> <div style="display: flex; justify-content: space-between;"> <div><input type="checkbox"/> 담낭</div> <div><input type="checkbox"/> 간</div> <div><input type="checkbox"/> 췌장</div> </div> <div style="display: flex; justify-content: space-between;"> <div><input type="checkbox"/> 신장</div> <div><input type="checkbox"/> 자궁</div> <div><input type="checkbox"/> 난소/나팔관</div> </div> 진단명: |
|-------|----------------------------------------------------------------------------------------------------------------------------------------------------------------------------------------------------------------------------------------------------------------------------------------------------------------------------------------------------------------------------------------------------------------------------------------------------------------------------------------------------------------------------------------------------------------------------------------------------|

|        |               |
|--------|---------------|
| 기타 수술력 | 수술부위:<br>진단명: |
|--------|---------------|

# 비영양

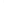

| 약 이름                                                                                                                                                                                                                   | 약 이름                                                                                                                                                                 |
|------------------------------------------------------------------------------------------------------------------------------------------------------------------------------------------------------------------------|----------------------------------------------------------------------------------------------------------------------------------------------------------------------|
| <input type="checkbox"/> 아스피린<br><input type="checkbox"/> 항응고제 (와파린/쿠마딘)<br><input type="checkbox"/> 소염진통제<br><input type="checkbox"/> 스테로이드제<br><input type="checkbox"/> 갑상선호르몬<br><input type="checkbox"/> 갑상선기능항진증약 | <input type="checkbox"/> 골다공증약<br><input type="checkbox"/> 칼슘제<br><input type="checkbox"/> 진정제/수면제<br><input type="checkbox"/> 한약<br><input type="checkbox"/> 기타 ( ) |

|            |
|------------|
| 헬리코박터 제균치료 |
|------------|

헬리코박터 제균치료를 받은 적이 있습니까?

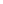

1



1

1

1

|     |  |
|-----|--|
| 가족력 |  |
|-----|--|

부모, 형제, 자매, 자녀 중 아래의 질환을 앓았거나 그로 인해 사망한 경우가 있습니까?

| 질환 명                                                         | 질환 명                                                                                             |
|--------------------------------------------------------------|--------------------------------------------------------------------------------------------------|
| <input type="checkbox"/> 고혈압<br><input type="checkbox"/> 당뇨병 | <input type="checkbox"/> 만성 간염/간경변<br><input type="checkbox"/> 간암<br><input type="checkbox"/> 위암 |

|                                                                                                        |                                                                 |
|--------------------------------------------------------------------------------------------------------|-----------------------------------------------------------------|
| <input type="checkbox"/> 협심증/심근경색 (남성 55세, 여성 65세 이전에 진단된 경우만 해당)<br><input type="checkbox"/> 뇌졸중 (중풍) | <input type="checkbox"/> 대장암/직장암<br><input type="checkbox"/> 폐암 |
|--------------------------------------------------------------------------------------------------------|-----------------------------------------------------------------|

**흡연력**

지금까지 총 5갑 (100개비) 이상의 담배를 피운 적이 있습니까?

☐ 아니오

☐ 과거에 흡연을 하였으나 현재는 끊었음 ▶ 금연 하신 지는 몇 년 되셨습니까? 만 ( ) 년  
 금연 전까지 흡연 기간은? 총 ( ) 년  
 금연 전 하루 평균 흡연량은? ( ) 개비

☐ 현재도 흡연 중 ▶ 흡연 기간은? 총 ( ) 년  
 하루 평균 흡연량은? ( ) 개비

**음주력**

술을 얼마나 자주 마십니까?

◦ 한 달에: ☐ 1번 이하 ☐ 2~4번

◦ 일주일에: ☐ 2번 ☐ 3번 ☐ 4번 ☐ 5번 ☐ 6번 ☐ 7번

술을 드실 때 한 번에 보통 몇 잔씩 마십니까?

(술 종류에 관계없이 각각의 술잔으로 계산합니다. 355cc 맥주 1캔 = 맥주 1.6잔)

☐ 1~2잔 ☐ 3~4잔 ☐ 5~6잔 ☐ 7~9잔 ☐ 10잔 이상

운동력

|                                                                                                                                                                                                                                                                                                                                         |                                                                                                                                                                                                                                                                                                                                         |                                                                                                                                                                                                                                                                                                                                         |
|-----------------------------------------------------------------------------------------------------------------------------------------------------------------------------------------------------------------------------------------------------------------------------------------------------------------------------------------|-----------------------------------------------------------------------------------------------------------------------------------------------------------------------------------------------------------------------------------------------------------------------------------------------------------------------------------------|-----------------------------------------------------------------------------------------------------------------------------------------------------------------------------------------------------------------------------------------------------------------------------------------------------------------------------------------|
| <p>지난 1주일 간, 평소보다 숨이 훨씬 더 차는 격렬한 활동을 하루 10분 이상 한 날은 며칠이었습니까?</p> <p>(예: 달리기, 빠른 속도로 자전거 타기, 단식 테니스, 등산, 무거운 물건 나르기 등)</p>                                                                                                                                                                                                               | <p>지난 1주일 간, 평소보다 숨이 조금 더 차는 중간 정도 활동을 하루 30분 이상 한 날은 며칠이었습니까?</p> <p>(예: 보통속도 자전거 타기, 복식 테니스, 가벼운 물건 나르기, 걸레질하기 등)</p>                                                                                                                                                                                                                 | <p>지난 1주일 간, 한 번에 적어도 10분 이상 걸은 날은 며칠이었습니까?</p> <p>(교통 수단 이용할 때 걸은 것뿐만 아니라 오락 활동, 여가 시간에 걸은 것도 포함)</p>                                                                                                                                                                                                                                  |
| <div> <input type="checkbox"/> 0일      <input type="checkbox"/> 1일         </div> <div> <input type="checkbox"/> 2일      <input type="checkbox"/> 3일         </div> <div> <input type="checkbox"/> 4일      <input type="checkbox"/> 5일         </div> <div> <input type="checkbox"/> 6일      <input type="checkbox"/> 7일         </div> | <div> <input type="checkbox"/> 0일      <input type="checkbox"/> 1일         </div> <div> <input type="checkbox"/> 2일      <input type="checkbox"/> 3일         </div> <div> <input type="checkbox"/> 4일      <input type="checkbox"/> 5일         </div> <div> <input type="checkbox"/> 6일      <input type="checkbox"/> 7일         </div> | <div> <input type="checkbox"/> 0일      <input type="checkbox"/> 1일         </div> <div> <input type="checkbox"/> 2일      <input type="checkbox"/> 3일         </div> <div> <input type="checkbox"/> 4일      <input type="checkbox"/> 5일         </div> <div> <input type="checkbox"/> 6일      <input type="checkbox"/> 7일         </div> |
| <p>그런 날 격렬한 활동을 하면서 보낸 시간:</p> <p>평균 <input type="text"/> <input type="text"/> <input type="text"/> 분/일</p>                                                                                                                                                                                                                             | <p>그런 날 중간 정도 활동을 하면서 보낸 시간:</p> <p>평균 <input type="text"/> <input type="text"/> <input type="text"/> 분/일</p>                                                                                                                                                                                                                           | <p>그런 날 걸으면서 보낸 시간:</p> <p>평균 <input type="text"/> <input type="text"/> <input type="text"/> 분/일</p>                                                                                                                                                                                                                                    |
